# Supplementary material for: Transcriptome Analysis of Flower Development and Mining of Genes Related to Flowering Time in Tomato (Solanum lycopersicum)
Source: Int J Mol Sci. 2021 Jul 29;22(15):8128. doi: 10.3390/ijms22158128 (PMC8347202; doi:10.3390/ijms22158128)
Supplement: Supplementary file 1 [file ijms-22-08128-s001.zip]

Archive with 6 entries (6 files):
- Figure S1.pdf
- Table S1.xls
- Table S2.xls
- Table S3.xls
- Table S4.xls
- Table S5.xls
