# Supplementary material for: Transcriptome Analysis of Flower Development and Mining of Genes Related to Flowering Time in Tomato (Solanum lycopersicum)
Source: Int J Mol Sci. 2021 Jul 29;22(15):8128. doi: 10.3390/ijms22158128 (PMC8347202; doi:10.3390/ijms22158128)
Supplement: Supplementary file 1 [file ijms-22-08128-s001.zip › Table S1.xls]

## Sheet: 1626069319611_5e4a074e5001
Gene ID	MM_1A Expression	MM_1B Expression	MM_1C Expression	MM_2A Expression	MM_2B Expression	MM_2C Expression	20965_1A Expression	20965_1B Expression	20965_1C Expression	20965_2A Expression	20965_2B Expression	20965_2C Expression
100037489	10.53	5.94	4.29	43.08	15.04	12.42	4.01	8.92	5.15	21.05	16.9	19.26
100037490	31.33	23.25	25.93	78.19	86.45	70.31	31.21	24.25	28.44	90.74	101.32	106.88
100037491	0.44	0.4	0.26	0.65	0.76	0.8	0.47	0.6	0.58	0.92	0.41	0.66
100037493	0	0	0	2.19	2.02	2.77	0	0	0	0	283.33	0.98
100037494	13.55	6.98	5.99	20.63	19.4	24.46	7.17	7.02	6.81	40.62	11.42	55.26
100037498	1.06	2.35	1.85	3.72	5.51	3.5	1.43	1.59	2.58	6	3.75	3.86
100037501	21.85	12.57	12.36	22.2	38.7	25.46	7.75	6.59	8.99	39.06	53.17	38.14
100037504	7.36	6.11	4.98	8.65	12.41	9.67	4.82	5.18	6.29	14.58	13.08	12.27
100037505	1.68	4.85	2.59	10.53	11.73	4.13	1.09	0.86	0.71	39.43	72.92	46.75
100037507	0.83	1.53	0.79	0.22	0.29	0.07	1.57	3.12	1.44	0.04	0.07	0.04
100037508	0.79	3.3	1.75	0.1	0.1	0.1	7.55	16.68	4.52	0	0.1	0.1
100037509	8.9	11.12	10.63	29.31	26.39	25.96	11.81	11.58	15.4	22.74	19.1	26.12
100037510	4.95	1.37	1	10.95	12.28	11.83	1	0.87	0.91	11.12	8.63	19.33
100037511	26.07	4.78	3.67	8.29	10.42	10.86	5.15	4.85	6.01	20.74	14.75	12.78
100037512	13.97	6.1	4.9	1.38	2.7	1.75	5.65	4.28	6.62	2.72	3.89	1.33
100037513	67.35	45.74	50.42	108.63	95.74	129.93	75	35.06	50.48	45.63	67.77	29.28
100037514	0.52	0.17	0.02	0	0	0	0.02	0.02	0.07	0	0.15	0
100037515	6.78	12.29	8.12	20.28	37.62	7.12	7	9.2	4.39	64.41	233.09	57.8
100037516	42.97	17.35	10.68	18.1	12	12.02	12.11	24.04	13.36	4.03	6.01	5.44
100037517	32.56	23.08	22.83	17.91	16.31	20.61	19.5	27.72	24.12	5.57	7.68	6.43
100037728	0.42	0.25	0.06	0.26	0.39	0.88	0.19	0.15	0.09	0.25	0.51	0.58
100037729	0.13	0	0.75	403.2	461.33	338.87	0	0.48	0.25	707.32	626.33	822.78
100037730	115.22	105.01	129.52	336.53	341.64	445.42	125.09	86.27	115.11	241.38	205.42	526.47
100037732	68.6	19.03	13.83	49.79	48.02	48.35	16.24	18.57	20.37	39.02	60.66	32.14
100037733	15.8	7.98	7.09	27.99	24.57	35.84	8.92	7.85	10.58	36.49	19.26	58.54
100037735	10.97	3.12	2.31	15.41	20.85	25.97	1.62	2.33	1.5	8.2	11.43	10.65
100037736	10.22	1.29	0.82	15.8	22.81	4.78	1.02	0.55	0.7	2.89	109.55	1.65
100125904	16.57	16.72	13.01	12.34	14.9	9.98	20.97	16.71	18.87	59.06	42.05	35.6
100125906	2.47	1.96	1.21	23.53	15.48	21.46	2.76	2.46	3.14	35.01	9.63	15.35
100125909	97.77	54.02	69.52	306.74	442.57	361.64	31.8	23.61	39.02	159.93	81.39	287.88
100125910	7.38	9.06	8.32	4.94	3.64	5.27	13.15	15.99	15.23	2.78	6.24	3.13
100134877	55.16	40.19	39	53.6	68.28	71.24	37.46	33.7	39.37	93.29	64.1	88.4
100134880	2113.59	3693.43	3704.61	1774.16	1477.53	849.91	2397.26	2182.7	2277.77	4710.03	1615.17	2182.88
100134881	2.67	1.05	0.96	1.36	4.27	1.73	0.78	0.33	0.8	2.81	4.77	2.78
100134883	13.73	41.83	31.56	16.94	52.75	9.98	14.17	19.96	21.18	95.77	8.74	96.3
100134884	20.91	18.57	15.98	11.45	11.73	11	15.91	17.73	17.07	7.22	8.03	6.8
100134889	0.71	0.52	0.32	6.5	2.4	2.02	0.43	0.78	0.74	7.46	3.49	14.13
100134891	14.59	5.83	4.23	9.26	12.47	12.57	4.27	4.76	5.23	10.91	6.81	9.91
100134892	13.31	7.4	4.84	4.1	3.81	4.38	8.1	11.92	9.5	3.83	5.13	3.32
100134896	1.87	1.17	0.74	9.16	4.79	6.47	1.23	1.57	1.63	10.45	8.32	20.37
100134897	9.76	2.41	2.04	6.58	11.48	7.83	1.51	1.43	2.09	10.16	7.24	11.24
100134903	18.07	12.43	10.22	28.61	34.68	39.79	10.93	14.27	12.88	21.52	27.67	21.07
100134906	13.58	2.09	2.36	0	0	0.05	0.44	0.05	0.49	0.06	0.06	0.06
100134908	4.12	2.52	1.84	5.36	8.85	8	0.92	0.56	1.91	9.51	7.56	8.71
100134910	13.97	19.63	13.34	26.94	34.88	30.9	15.44	32.61	17.94	17.88	16.04	31.95
100134911	7.41	8.85	3.5	9.74	15.94	2.8	2.79	5.76	3.64	84	19.56	9.38
100134912	0	0	0	0.18	0.12	4.65	0.06	0	0	0.06	0	0.06
100134913	9.79	3.04	2.12	2.54	2.36	1.94	2.86	3.35	3.51	3.5	4.05	4.71
100134914	3.18	2.7	2.28	6.1	6.5	6.87	2.08	3.19	3.6	6.41	7.17	4.41
100135703	0.75	0.58	0.59	4.21	10.56	4.08	1.36	1.01	1.36	4.75	14.52	5.7
100136887	5.28	3.25	1.97	13.89	17.14	7.37	2.48	2.9	2.47	19.05	7.31	32.7
100147715	73.16	126.15	92.57	54.68	86.33	37.72	76.66	84.59	71.38	32.19	27.15	17.73
100147716	0.82	0.11	0.09	1.03	0.4	0.89	0.25	0.14	0.15	1.31	0.73	1.7
100147717	569.76	314.11	728.01	1334.11	937.04	1445.06	566.62	134.64	451.62	841.11	572.39	1291.43
100147719	0.72	0.26	0.53	36.83	41.45	12	2.3	0.77	1.06	5.58	2.73	7.73
100147720	28.88	6.79	3.91	94.88	101.78	53.86	4.9	5.43	7.81	25.85	60.74	43.51
100147722	131.62	70.33	64.19	752.46	792.22	990.22	44.66	41.72	73.74	502.9	760.36	622.67
100147727	0.28	0.05	0.33	143.08	215.34	3.7	0.11	0.81	0.11	1105.8	1162.11	26.27
100147728	25.58	16.6	13.55	19.23	28.6	25.43	12.78	12.35	16.67	35.01	23.2	30.05
100191110	189.98	145.7	170.6	541	546.16	603.06	157.78	97.08	149.23	496.76	271.18	725.93
100191114	160.1	256.2	283.17	327.43	443.08	252.72	169.33	128.3	227.57	1331.11	341.82	318.12
100191115	0	4.13	4.07	0	0	0	3.67	11.68	5.63	0	0	0
100191116	19.87	12.26	10.27	36.04	30.72	38.33	9.11	9.52	11.52	60.89	31.29	53.95
100191117	5.46	2.05	1.38	6.25	7.05	6.24	2.19	2.37	2.45	6.29	5.71	6.53
100191118	39.33	28.63	27.63	68.69	76.82	62.91	25.09	38.53	32.74	52.1	95.33	50.34
100191121	13.68	7.11	6.41	29.92	44.44	50.89	5.26	5.48	8.91	24.61	24.11	27.88
100191123	13.47	4.58	2.88	4.75	5.78	3.78	1.97	4.48	3.42	2.05	1.75	1.84
100191125	33.94	18.9	13.66	37.23	43.05	50.12	13.84	12.57	17.25	26.28	23.41	34.92
100191126	18.02	21.76	19.86	39.8	61.66	39.01	16.73	16.13	19.9	33.92	25.66	30.38
100191127	119.63	94.62	69.11	222.34	116.58	161.15	81.36	114.55	96.24	97.66	126.9	322.91
100191129	2.4	12.94	5.77	1.45	5.44	1.66	21.01	28.67	4.21	0.26	0.22	0.11
100191131	3.5	2.64	1.72	4.83	4.12	5.57	1.86	2.18	2.38	7.18	6	16.11
100191133	11.64	10.05	9.12	16.4	14.78	17.99	9.24	7.95	9.68	17.36	20.57	12.41
100191134	59.24	52.31	45.22	1.01	1.51	1.07	58.06	9	63.48	0.45	0.73	0.55
100191135	14.6	12.02	9	19.75	22.42	20.13	7.12	5.61	8.38	31.74	19.46	34.95
100191136	42.42	28.7	23.47	11.43	13.97	12.88	33.04	49.6	26.82	10.37	16.48	8.72
100191137	20.78	17.85	24.48	65.5	47.31	53.74	31.05	35.83	40.46	182.43	62.34	226.36
100191138	14.55	5.11	3.39	20.07	17.38	17.42	3.99	4.78	5.5	12.8	23.08	9.8
100240705	0.18	2.76	1.49	0	0.03	0	2.32	1.82	2.77	0	0	0
100271890	571.17	361.95	398.17	105.22	182.87	99.22	294.85	192.68	298.77	56.63	218.25	47.01
100301920	15.11	17.4	14.45	6.38	7.89	6.08	13.09	14.98	17.63	9.34	7.35	4.39
100301921	38.93	23.89	25.26	62.41	71.68	66.94	19.6	18.68	26.4	42.55	73.54	42.33
100301923	20.47	14.32	8.67	38.27	38.78	38.77	8.24	8.06	8.42	33.34	31.77	27.91
100301924	11.89	38.99	31.49	11.87	12.79	17.05	48.49	66.62	55.17	12.47	8.69	7.3
100301925	0.27	0.29	0.46	4.34	13.08	0.69	2.15	4.58	1.04	0	0.07	0.1
100301926	56.86	35.72	30.54	36.51	64.94	22.74	24.41	16.09	20.47	43.92	49.72	24.46
100301927	40.71	21.57	18.67	22.07	26.36	15.03	17.5	21.16	20.28	171.64	37.21	30.9
100301934	2.9	7.95	6.85	0.19	0.38	0.55	11.45	17.96	10.66	0.14	0.42	0.09
100301936	20.91	0.71	1.54	11.52	15.54	36.08	1.39	0.54	3.55	155.12	42.94	54.06
100301941	1.74	1.26	0.72	0.88	2.68	1.47	0.81	0.8	0.49	2.33	0.95	2.34
100301942	33.9	25.45	12.46	14.81	24.88	13.37	2.73	4.06	4.5	28.25	13.83	41.01
100301943	31.62	40.69	43.97	73.66	90.73	90.9	35.49	24.72	35.69	76.08	64.72	113.39
100301944	4.26	2.92	1.62	6.73	6.25	4.18	1.47	1.63	2.87	12.46	6.48	17.49
100301945	24.34	94.1	84.61	15.44	33.21	38.26	70.91	66.66	82.93	23.42	15.71	17.46
100301981	14.02	20.67	18.59	34.47	59.56	42.54	12.62	11.81	14.14	40.69	27.58	55.58
100313501	0.16	0.03	0	0	0	0	0.08	0.05	0.1	0	0	0
100313952	47.46	36.73	27.43	22.12	25.75	25.59	36.38	50.44	41.53	14.73	18.32	15.49
100316872	14.59	0.03	18.35	2.06	2.68	2.59	0	0.08	0.69	3.62	0.66	3.43
100316873	274.22	144.29	170.92	711.74	547.93	660.31	191.04	104.02	170.54	328.15	347.85	611.81
100316875	0.46	0	0	0.27	0.53	1.1	0.26	0.7	0.45	22.94	1.13	1.45
100316877	3.2	3.39	2.36	3.14	4.26	2.95	1.81	2.5	2.3	10.38	4.26	16.93
100316879	22.07	16.55	12.81	23.57	27.67	21.15	9.95	10.42	14.08	22.45	20.78	22.79
100316880	17.06	12.81	13.92	5.69	9.11	5.82	16.16	15.9	15.25	190.87	23.39	308.14
100316882	19.78	7.91	5.73	19.72	17.37	22.44	7.62	6.81	7.51	16.01	13.57	22.36
100316884	45.51	9.18	14.17	3.59	11.95	4.8	24.41	23.99	17.94	46.61	16.64	17.2
100316887	1.98	1.22	0.96	7.88	8.47	5.91	0.39	0.44	1.6	4.65	3.79	5.32
100316891	9.76	0.13	1.01	2.6	5.41	1.05	0.66	0.47	0.56	3.1	0.98	2.36
100316893	0.63	0.36	0.37	4.6	5.35	3.32	0.31	0.42	0.49	3.37	10.97	6.87
100316894	46.12	19.57	17.02	42.1	46.51	39.61	17.49	19.17	17.29	35.39	38.28	32.31
100316895	28.23	18.37	18.1	13.18	21.76	9	22.16	29.81	20.32	10.74	16.27	4.27
100316896	70.49	99.12	109.69	35.93	52.75	47.16	112.9	145.69	109.9	52.5	51.02	48.2
100316897	40.65	51.03	54.01	39.51	31.43	40.45	63.68	67.05	61.36	12.43	22.83	14.24
100316901	253.54	227.8	187.97	517.67	608.76	395.41	157.27	121.68	137.15	390.1	307.94	302.56
100322875	24.73	14.45	12.3	36.84	33.26	40.07	12.89	10.58	13.1	34.95	32.54	29.85
100462655	3.66	4.27	3.55	1.78	1.69	1.53	5.35	8.21	5.98	0.62	0.83	1.24
100500729	27.48	37.59	35.41	25.21	20.86	26.4	29.72	28.92	35.44	9.61	16.67	9.94
100505457	43.65	13.35	10.55	5	6.46	6.63	10.13	11.4	12.83	6.21	8.25	4.76
100527965	11.56	21.38	16.95	5.45	9.44	7.1	24.89	34.83	22.18	7.89	6.44	4.12
100527967	5.52	6.64	7.72	29.6	22.44	28.79	3.7	3.81	3.78	58.27	23.27	41.03
100527968	25.57	25.06	28.72	63.96	69.79	81.73	26.44	17.4	28.11	97.21	55.52	97.95
100527969	31.76	3.31	1.84	0	0.06	0.06	2.01	2.42	1.65	0.41	3.06	0.23
100527970	2.22	2.49	3.31	0.52	0.52	1.2	2.73	3.86	2.58	0.33	0.74	0.52
100527971	7.25	12.06	8.09	5.91	7.41	7.66	13.11	27.09	13.16	7.48	6.4	5.46
100527972	1.64	2.16	1.36	0.27	0.38	0.05	1.48	1.4	1.38	0.82	0.37	0.34
100527974	8.64	17.63	14.35	3.48	4.34	4.52	23.21	47.48	25.71	4	3.07	2.12
100529100	3.56	2.03	3.59	9.61	7.91	11.76	3.68	3.74	5.01	10.17	6.46	15.79
100529102	12.81	0.4	0.47	7.85	4.17	7.09	0.68	0.53	0.64	6.23	3.58	7.82
100529106	8.67	5.12	8.4	3.1	3.75	1.05	5.25	1.82	6.16	2.6	4.41	3.96
100529127	1.31	0.4	0.58	0.8	0.7	0.58	0.05	0.07	0.15	0	7.21	0.03
100529136	5.88	0	0	0	0	0	0.08	0.03	0.03	0	0.03	0
100529139	123.1	11.45	11.4	0.35	0.41	0.4	8.15	5.12	17	2.48	0.64	0.81
100529140	39.61	13.7	11	32.66	28.36	27.84	10.5	11.29	12.28	49.96	19.32	44.6
100736245	40.94	20.51	17.66	34.53	75.75	43.6	19.63	19.26	23.83	24.47	23.3	16.16
100736246	2.73	6.38	4.47	2.2	3.21	2.39	5.86	6.54	6.54	2.02	1.93	1.95
100736436	0.93	6.11	6.79	0.07	0.21	0.07	2.6	3.18	3.29	5.37	0.28	0.31
100736439	45.43	36.73	30.6	96.52	106.54	85.43	38.29	50.94	32.69	85.09	81.28	106.72
100736441	24.06	11.96	16.79	123.2	65.3	65.36	15.01	10.55	28.1	89.79	32.99	147.25
100736444	15.44	9.8	6.49	48.49	45.3	21.04	4.5	6.69	6.73	26.12	16.92	31.03
100736445	13.92	23.05	18.16	0.36	0.41	0.32	22.98	23.69	29.46	0.34	0.56	0.35
100736446	426.29	865.75	701.95	308.79	408.76	168.8	526.24	513.98	470.94	447.92	156.37	220.12
100736448	38.39	26.58	21.26	3.19	3.75	4.37	31.95	59.2	36.05	1.09	3.86	1.73
100736450	33.76	67.71	51.61	20.16	30.57	31.3	46.87	57.44	55.19	24.5	24.63	18.02
100736451	25.47	9.82	14.34	34.84	41.83	40.67	16.42	12.52	15.51	53.48	124.46	85.56
100736454	3.43	1.04	0.74	3.58	4.16	3.85	0.7	1.05	1.66	6.78	2.23	8.14
100736455	0.08	0.15	0.04	0	0	0	1.05	1.69	0.22	0	0.04	0
100736456	14.34	7.1	6.99	11.79	11.89	8.8	7.07	7.97	8.35	25.78	8.1	15.11
100736457	22.51	52.34	56.09	19.81	22.72	22.27	53.62	61.38	50.93	17.53	14.27	24.4
100736459	9.02	6.71	8.02	21.92	27.6	24.76	4.37	4.61	5.38	14.07	18.99	11.41
100736464	59.65	88.71	94.13	70.62	96.52	76.74	80.8	78.91	99.03	176.05	203.47	84.95
100736466	2.16	0.9	0.99	0.21	1.01	0.03	4.52	7.02	3.97	0.1	0.14	0.17
100736469	38.41	21.92	24.37	82.24	107.99	104.24	19.34	18.09	22.34	76.23	96.05	102.83
100736470	31.83	30.1	20.65	69.74	67.46	67.42	13.62	13.5	18.12	34.42	46.24	53
100736471	16.52	16.1	13.86	8.47	9.27	11.58	18.92	21.98	22.22	8.04	8.59	6.74
100736473	11.25	13.59	12.71	31.17	62.97	52.41	7.97	3.72	7.19	19.21	29.04	107.48
100736474	13.13	10.12	8.54	17.37	17.96	16.22	8.61	10.55	12.17	20.07	14.67	22.33
100736476	2.26	1.46	1.29	0.59	0.5	0.73	1.56	2.28	1.74	0.68	3.58	0.32
100736477	25.71	58.31	56.05	9.21	18.66	20.02	82.03	109.03	86.06	5.38	6.29	5.69
100736478	7.43	7.68	7.43	28.6	22.64	37.44	5.86	5.12	12.35	45.62	22.52	33.98
100736480	0.39	0.61	0.25	1.03	0.52	1.53	0.25	0	0.63	1.54	0.39	3.32
100736486	2.39	1.55	1.38	2.08	2.36	2.01	0.82	0.56	1.15	2.74	3.2	2.04
100736487	1.95	0.99	0.94	1.13	1.39	0.74	2.99	5.46	2.69	0.53	4.25	0.46
100736493	5.13	4.47	5.52	17.6	29.52	14.62	8.68	14.73	5.99	6.51	22.52	4.21
100736498	176.06	29.95	37.66	500.82	548.5	421.65	33.45	43.28	49.04	785.64	551.69	1329.21
100736499	167.63	121.87	123.61	187.92	255.04	193.3	97.78	75.74	104.76	169.09	225.37	167.3
100736500	38.33	79	98.42	41.89	18.77	25.22	39.07	39.59	40.46	25.64	20.52	44.22
100736502	4.84	0.01	0.01	0.11	0.03	0.06	0.14	0.03	0.3	0.01	0.21	0
100736503	17.85	8.46	6.51	67.4	93.57	65.77	8.31	6.87	7.14	24.48	39.03	42.84
100736504	1.28	3.94	1.42	0.24	1.45	0.69	8.83	11.16	1.43	0.97	0.27	0.4
100736506	24.43	21.52	17.9	37.03	48.1	37.46	15.9	16.03	17.46	28.18	29.06	34.97
100736509	37.31	68.35	59.44	28.09	33.31	29.45	55.21	59.85	69.88	26.13	16.16	31.84
100736510	10.4	11.87	8.16	18.79	19.06	20.92	7.77	7.49	10.03	13.98	25.69	12.21
100736513	8.18	13.47	8.42	7.4	4.47	7.12	15.03	16.76	11.92	0.96	1.9	2.03
100736515	38.81	23.31	13.73	4.62	4.51	4.65	9.95	10.63	6.94	8.2	3.92	1.87
100736516	28.56	19.1	17.19	43.2	47.05	39.73	17.69	16.41	18.79	64.56	32.49	46.55
100736517	0.27	0.95	0.52	0	0	0	0.72	2.54	0.32	0	0	0
100736521	9.16	10.03	11.89	2.63	4.56	2.76	9.52	11.31	8.72	2.4	2.5	1.68
100736522	9.93	9.15	12.44	7.3	8.41	9.19	18.52	22.35	17.35	6.05	6.8	6.8
100736523	8.08	8.68	13.1	1.09	1.74	2.13	15.07	23.52	14.72	7.23	2.61	1.73
100736525	22.13	19.63	17.98	19.45	24.86	22.61	20.7	30.64	23.01	335.71	46.33	125.69
100736527	259.81	530.37	599.49	119.89	117.19	126.2	641.23	650.33	669.66	319.25	420.84	328.86
100736528	379.77	344.19	224.66	196.33	265.6	106.46	190.73	218.79	144	53.18	50.59	24.98
100736529	0.94	13.44	8.21	0.11	1.41	0.11	4.55	7.46	4.34	0.04	0	0
100736530	43.73	46.84	39.28	29.39	28.83	29.69	50.67	63.08	49.36	9.13	23.69	10.33
100736534	8.68	9.47	6.32	9.9	13.06	12.98	8.76	10.97	8.37	19.74	21.34	20.09
100736537	16.21	15.94	13.18	6.44	10.09	8.28	15.07	15.04	18.35	31.06	13.87	14.81
100736538	41.38	31.53	27.57	37.23	37.58	42.6	28.82	32.22	31.78	65.99	40.25	91.02
100736539	28.31	16.66	10.38	21.98	19.29	18.37	11.1	16.52	15.02	31.46	48.67	26.32
100736540	11.31	13.93	12.25	29.18	26.14	41.78	6.83	10	8.6	32.28	20.53	27.6
100736541	1.15	2.37	2.18	0.12	0.12	0.04	4.08	6.13	3.54	0.08	0	0.16
100736543	1.72	0.71	0.34	2.79	3.14	2.34	0.78	1.26	1.2	3.65	2.24	2.33
100736544	10.17	0.1	0.13	0.58	0.82	0.53	0.27	0.1	0.33	0.75	1.99	1.09
100750252	0	0	0	0.36	1.53	0.26	0	0.17	0	0.09	1.8	0
100750256	1.09	0.98	0.9	1.67	2.87	2.45	1.04	0.65	0.72	2	2.3	1.83
100820707	33.6	24.54	18.92	33.02	27.4	33.86	19.85	24.6	20.55	26.21	62.71	32.27
100874535	0.22	0.11	0.04	0.89	0.37	0.4	0.32	0.07	0.04	2.55	0.07	1.02
100874537	0.37	0.65	0.55	1.62	1.54	0.81	0.37	1.34	0.8	2.31	1.24	1.98
100874538	11.86	12.51	1.27	0.11	0.32	0	7.9	2.55	5.56	0.11	1.41	0
100874539	30.72	15.92	10.79	44.19	53.05	25.92	23.08	28.93	20.91	27.16	19.61	35.13
100874540	4.21	4.11	2.75	1.66	2.82	4.01	6.47	7.67	8.2	32.58	13.87	35.65
100874542	0.92	0.57	11.59	0.13	0.13	0.19	0.71	0.63	0.64	0.26	0.13	0.2
101055499	8.89	11.22	11.08	5.82	6.67	5.84	16.24	20.77	16.59	7.52	4.6	10.16
101055501	1.47	1.22	1.01	4.82	5.16	3.21	1.01	0.71	1.04	3.55	9.24	3.03
101055502	10.46	9.45	8.22	15.82	21.3	22.62	8.17	7.85	10.08	20.68	30.37	19.46
101055503	24.17	23.09	14.57	28.71	31.66	43.16	11.9	15.37	14.64	60.86	143.83	58.55
101055507	0.79	0.92	0.95	23.7	19.29	34.86	0.61	0.33	0.38	4.29	6.61	4.91
101055513	8.03	35.3	37.25	4.81	2.48	6.3	33.83	31.02	33.34	0.48	1.18	1.09
101055514	96.31	111.47	91.2	39.32	35.75	33.69	97.54	126.4	110.1	22.48	33.94	15.47
101055518	32.13	26.06	25.44	35.02	27.89	51.16	34.37	30.34	35.01	3.95	24.41	6.93
101055519	157.61	94.67	148.23	478.04	648.51	690.82	122.37	45.01	120	541.4	244.74	856.56
101055520	4.73	4.58	4.65	11.16	14.84	12.4	5.14	4.6	5.6	17.7	23.9	14.02
101055523	3.63	3.48	4.06	9.15	12.96	10.14	4.01	3.22	4.99	7.28	4.21	8.13
101055524	65.51	40.8	52.97	139.5	500.54	588.73	45.59	36.52	45.41	158.5	138.64	136.51
101055525	26.8	34.77	38.09	33.07	25.6	34.41	40.44	41.53	44.02	14.39	20.79	12.7
101055526	17.9	25.59	32.85	12.44	17.86	10.74	34.77	45.45	33.04	19.07	13.59	12.09
101055527	10.64	5.59	5.18	14.98	17.89	13.55	5.66	6.7	7.6	12.62	13.92	13.44
101055528	6597.66	11052	10708.5	4958.4	2428.04	872.03	4275.54	3555.58	3513.53	15183.4	4450.74	4223.21
101055532	52.66	31.51	20.37	21.06	41.35	23.97	13.64	12.88	14.04	30.62	23.69	20.14
101055534	1.78	3.04	3.24	1.42	2.26	2.68	5.43	9.25	2.88	31.53	1.31	35.23
101055537	16.78	17.32	19.22	19.08	14.56	23.92	26.74	23.4	22.41	1.57	11.2	4.81
101055541	7.89	8.89	4.7	15.88	16.08	9.94	6.01	10.43	8.28	6.61	8.56	25.44
101055542	3.61	2.99	1.71	0.27	0.33	0.18	4.31	5.63	2.84	0.44	0	1.48
101055545	44.52	13.98	14.68	6.54	9.23	10.36	17.02	12.91	20.9	10.16	5.31	7.91
101055548	24.39	17.64	17.81	32.01	65.5	29.94	11.27	9.75	12.84	48.63	80.34	14.12
101055549	2.06	4.26	4.7	0.58	0.33	0.41	2.35	1.65	2.25	2.05	1.91	2.71
101055552	64.61	27.77	20.98	13.05	11.61	10.75	18.87	36.2	18.91	16.04	8.26	16.26
101055553	0.92	0.39	0.3	2.65	1.12	1.1	0.6	0.77	0.4	1.52	2.05	2.72
101055555	3.08	1.64	1.57	18.22	13.11	10.78	6.49	4.05	8.76	13.35	9.43	18.02
101055557	39.51	47.88	44.21	41.67	45.52	51.75	34.53	26.69	31.27	51.85	57.34	67.28
101055558	66.77	0.73	0.91	8.72	8.59	7.85	0.89	0.52	1.46	1.47	23.36	8.38
101055559	15.89	9.82	9.34	0.98	0.86	0.91	8.37	12.72	11.09	2.79	1.7	2.01
101055560	12.99	9.95	8.3	1.93	2.56	3.14	7.44	5.07	6.24	1.26	24.83	1.08
101055561	12.31	11.6	12.4	30.91	13.29	28.32	9.48	10.53	16.04	20.14	23.1	19.51
101055564	11.92	14.49	11.69	2.9	3.43	3.86	15.54	19.82	16.48	3.17	3.98	2.24
101055565	79.53	134.82	163.27	28.99	41.94	37.69	186.08	162.09	211.27	36.43	46.79	95.99
101055566	17.28	24.03	56.32	150.39	169.28	293.3	40.26	25.86	63.02	284.01	157.98	556.16
101055567	2.91	2.09	2.07	5.41	6.45	6.2	5.44	4.89	5.71	6.71	7.08	8.68
101055569	3.57	6.07	3.37	0.7	0.66	0.76	9.36	1.53	18.37	0.46	0.5	0.36
101055572	179.18	272.05	324.81	293.86	464.72	436.66	239.38	193.12	274.79	1593.52	315.79	1745.28
101055573	13.83	2.17	1.43	16.74	14.65	18.88	1.33	0.63	1.93	1.29	13.37	4.25
101055575	24.65	30.84	24.86	14.3	15.15	15.36	28.05	30.14	31.75	9.72	11.16	10.09
101055576	10.49	8.1	6.08	1.71	1.51	2.51	9.11	11.51	10.9	0.67	1.47	1.56
101055579	4.32	9.65	6.34	1.57	5.64	2.94	10.04	29.36	14.4	222.87	4.56	72.93
101055581	96.69	7.69	5.89	4.15	6.65	5.3	6.53	5.3	6.34	4.35	4.63	6.22
101055582	5.36	2.79	3.9	5.7	8.23	6.22	2.63	3.01	4.1	5.89	9.31	5.24
101055583	4.97	2.52	4.83	8.21	8.51	4.49	2.6	0.95	4.05	98.84	8.36	163.82
101055585	21.42	4.95	4.56	14.11	37.46	16.05	3.42	2.39	2.08	9.06	41.58	12.49
101055586	2.36	6.92	4.52	16.82	19.63	17.25	6.06	11.26	6.67	9.23	9.04	29.47
101055587	16.97	24.57	33.37	48.04	29.33	45.71	25.52	11.84	26.61	50.53	25.04	71.82
101055592	7.6	1.14	2.18	7.71	7.8	8.14	2.68	1.71	1.83	15.29	8.07	21.88
101055593	8.25	10.36	8.73	3.69	8.43	9.82	9.22	9.87	12.19	3.52	4.69	3.71
101055594	1.87	1.77	1.51	0.34	0.66	0.43	1.73	2.2	1.83	1.21	0.6	1.19
101055596	4.62	6	4.34	18.24	29.11	17.57	16.38	11.3	29.74	11.07	8.78	11.27
101055598	11.85	9.16	7.32	21.86	27.73	25.22	8.79	12.01	9.77	17.14	16.71	24.71
101055600	44.54	99.14	112.59	27.13	38.43	48.25	102.9	105.28	105.68	45.22	33.56	36.94
101055601	11.1	11.37	15.85	38.34	44.43	35.63	11.32	8.38	10.93	36.89	35.32	31.49
101055603	4.82	3.51	2.51	6.79	8.64	5.82	3.06	2.49	4.8	10.2	7.37	8.4
101055604	30.9	27.27	20.39	15.91	16.73	14.25	26.31	34.44	24.1	8.14	11.2	7.09
101055605	34.1	22.55	18.58	62.4	99.92	79.12	16.9	14.2	16.67	88.01	63.78	82.3
101055608	22.43	26.87	23.87	16.99	21.86	22.43	33.95	35.76	34.18	55.14	69.01	38.06
101055611	0.77	0.68	0.6	1.44	1.13	1.09	0.81	0.62	0.79	0.88	2.35	1.72
101055612	43.03	22.38	17.17	18.26	20.7	19.05	18.52	16.58	22.16	80.44	12.9	45.03
101055613	0.39	0.59	0.28	0.51	0.34	0.27	0.44	0.48	0.54	2.17	0.56	3.74
101243626	13.63	9.01	4.78	4.55	4.07	3.38	7.04	12.88	6.38	6.97	4.61	10.09
101243629	10.35	2.17	1.99	4.57	6.5	4.16	1.42	1.22	1.88	6.08	3.79	9.28
101243631	11.11	19.16	18.05	15.33	23.5	23.3	10.22	11.84	14.75	113.92	9.28	58.66
101243633	2.55	1.08	0.94	1.06	0.96	1.21	0.99	1.85	1.7	0.23	0.59	0.27
101243635	5	4.44	2.1	1.89	1.44	1.28	3.61	4.92	4.47	0.22	0.96	0.41
101243636	44.33	55.76	42.49	9.89	7.89	10.12	65.5	91.54	75.03	3.3	10.37	6.14
101243644	3.01	2.86	2.14	0.66	0.62	0.78	2.14	3.47	2.88	0.45	0.42	0.24
101243648	19.44	14.16	14.74	16.22	14.87	13.06	18.92	28.62	18.04	8.21	11.31	7.93
101243651	0.16	0.53	0.26	0	0.08	0.1	0.49	0.9	0.44	0	0.05	0.03
101243653	22.42	30.3	31.03	13.31	14.48	15.21	40.05	49.22	42.86	14.07	14.39	12.71
101243654	28.81	35.69	30.71	17.09	16.52	19.21	31.16	37.88	37.73	14.49	16.13	12.86
101243655	137.53	117.14	109.5	168.52	222.36	199.69	116.71	119.01	120.31	308.57	197.13	255.86
101243656	178.1	198.62	225.22	91.83	208.68	38.98	91.41	90.1	96.63	413.99	729.29	142.87
101243657	0.67	2.03	2.41	0.06	0.22	0.16	1.37	3.04	1.89	2.33	0.5	0.78
101243658	3.19	1.88	1.22	0.63	0.49	0.87	2.42	3.42	2.52	0.4	0.53	0.63
101243659	24.08	9.02	4.32	29.27	24.54	10.67	4.95	9.51	4.37	16.95	21.77	23.13
101243668	0.12	2.7	2.45	0.12	0.07	0.02	2.62	3.89	2.46	0.02	0.05	0.05
101243669	3.02	1.9	1.04	2.03	3.18	2.5	0.98	1.26	1.12	2.61	1.66	1.85
101243671	18.8	14.31	18.59	6.62	2.56	2.92	5.77	5.21	5.78	0.63	3.07	1.62
101243672	3.53	2.15	1.45	0.43	0.36	0.58	2.07	5.27	3.6	0.18	0.32	0.3
101243674	3.43	1.66	0.49	1.71	2.43	2.27	1.23	1.54	0.86	3.26	3.23	3
101243675	0	0.41	0	1.43	3.93	2.3	0	0.07	0.07	5.45	1.79	4.17
101243684	48.52	11.54	16.75	67.55	62.88	40.38	14.77	14.46	20.17	44.88	80.19	103.81
101243686	830.27	0	0	0.08	0.08	0	0.15	0.22	0.15	0.08	2.32	0.23
101243687	18.23	12.67	14.84	19.93	13.38	18.5	16.49	13.96	16.08	5.64	9.52	7.09
101243689	2.12	0.57	0.42	2.09	1.08	1.24	0.61	0.62	0.34	3.05	0.94	3.6
101243690	11.24	2.95	2.87	9.37	9.31	13.03	4.18	2.54	4.92	14.97	23.64	18.3
101243692	17.21	0.27	0.31	2.03	3.39	2.15	0.07	0.03	0.24	1.07	8.5	0.49
101243696	6.19	1.35	0.85	7.55	6.53	4.92	1.15	1.49	1.6	13.1	6.7	9.81
101243697	1.47	2.21	2.51	0.64	0.05	0.38	4.05	5.61	3.14	0.15	0.05	0.1
101243699	108.29	142	141.77	23.56	24.77	22.46	133.17	91.17	127.19	6.58	27.72	21.13
101243702	4.03	1.61	1.54	9.15	13.36	10.77	0.82	1.13	1.64	13.44	11.59	14.2
101243704	49.32	34.02	28.63	63.87	91.24	67.71	28.04	27.23	30.25	68.24	53.03	61.37
101243709	0.26	0.08	0.08	1.34	1.75	0.92	0.03	0.1	0.1	3.35	0.34	1.3
101243711	9.73	4.85	5.5	4.48	4.86	5.01	3.79	2.4	4.64	10.01	10.98	12.9
101243714	23.28	21.24	22.16	30.8	36.21	30.26	11.43	10.53	11.75	48.23	24.71	34.49
101243715	4.43	1.87	2.05	1.78	1.32	1.86	1.51	2.28	1.61	2.77	14.89	3.53
101243720	2.37	1.65	1.22	8.35	8.01	4.5	1.11	0.88	0.99	6.82	3.41	9.25
101243721	4.09	1.7	2.19	0.2	0.08	0	3.57	6.35	3.01	0.08	0.08	0.16
101243722	0	0	0	6.09	5.63	1.87	0	0	0.18	0	146.76	2.73
101243725	0.09	0	0	0.16	0.16	0.74	0	0.03	0	0	6.71	0.09
101243727	23.03	9.9	8.68	17	19.65	20.95	7.42	7.01	11.15	18.34	23.56	21.92
101243730	6.37	8.22	7.64	2.2	1.87	3.52	14.55	14.54	11.33	2.8	1.37	2.97
101243735	5.17	7.14	7.1	2.77	3.26	3.44	10.08	8.91	11.31	2.85	2.1	2.9
101243736	0	0	0	0.03	0	0.23	0	0	0	0	2.11	0
101243738	8.49	0.82	1.44	0	0	0	0	0	0.12	0	0.12	0
101243740	41.74	84.03	75.82	57.78	102.16	30.74	78.65	78.02	67.69	28.7	20.87	18.41
101243743	3.86	8.14	2.87	4.92	3.78	4.74	1.8	2.78	2.92	6.42	4.84	4.92
101243744	13.28	15.53	17.69	22.36	30.44	28.61	16.8	16.3	18.69	37.32	27.78	41.12
101243748	1.86	1.59	1.71	1.57	0.96	1.5	1.77	2.49	1.8	0.24	0.81	0.75
101243754	15.66	18.25	20.01	11.23	13.65	14.65	30.93	25.76	30.33	10.36	13.65	10.11
101243755	26.66	26.47	23.71	24.2	33.6	48.04	22.61	20.01	25.18	33.77	72.58	40.82
101243757	6.87	4.16	3.74	3.52	3.85	3.8	5.57	11.15	6.42	2.7	3.61	2.7
101243759	0.6	0.56	0.26	0.76	0.74	1.02	0.4	0.54	0.24	0.83	0.46	1.37
101243761	35.02	17.88	15.48	117.82	76.63	99.03	22.91	22.14	14.59	38.26	56.12	84.47
101243766	731.18	690.12	1150.67	1471.39	857.28	918.72	921.68	437.93	1066.39	2790.86	664.46	3544.64
101243767	1.72	1.28	2.04	5.94	4.72	3.68	1	0.47	1.29	11.98	5.68	10.8
101243774	25.8	21.73	18.63	41.5	45.35	51.53	25.73	17.63	34	10.89	29.7	14.03
101243775	2.85	1.52	1.22	0.79	0.68	0.8	2.15	2.38	2.3	0.36	0.4	0.53
101243777	16	19.23	15.37	2.39	2.54	5.96	23.38	30.2	22.08	12.29	9.61	5.7
101243784	27.34	10.52	19.94	91.2	58.2	80.05	13.08	9.5	10.66	29.48	63.7	40.96
101243787	0	0	0	3.96	3.02	1.82	0	0.04	0.04	0	295.7	3.05
101243788	5.01	4.23	5.28	14.29	17.26	16.52	7.03	5.91	6.98	19.54	14.92	24.27
101243792	1.49	0.33	0.33	1.57	0.81	0.87	0.2	0.26	0.33	11.12	1.91	1.62
101243795	20.52	13.46	12.98	26.19	33.73	26.72	9.99	12.23	13.46	24.55	19.77	21.67
101243801	0	0	0	0.04	0.09	0	0	0	0	0	3.75	0
101243803	0.84	0.7	0.31	0	0.04	0	0.03	0	0.14	0	0.14	0.03
101243804	14.26	12.11	13.17	15.23	9.04	16.18	17.65	16.95	14.27	4.03	8.92	4.23
101243805	0.07	0.07	0	1.64	0.55	0.2	0.07	0	0.07	0.61	0.14	0.14
101243810	9.1	5.96	4.35	30.43	21.47	30.77	5.11	5.73	6.15	18.84	15.19	34.57
101243813	3.67	3.36	8.65	5.61	1.65	1.98	0.32	0.63	0.64	0.16	0.11	0.11
101243814	34.71	6.19	5.27	14.29	27.95	19.65	7.95	7.66	8.3	22.61	47.77	24.04
101243817	0.18	0.35	0.13	0	0.03	0.03	0.2	0.2	0.28	0.03	0	0
101243818	33.66	45.78	49.99	41.96	41.43	43.51	48.4	50.34	42.61	5.21	21.51	3.9
101243821	41.64	18.89	13.25	8.48	3.84	7.89	17	19.46	21.11	5.02	7.8	4.13
101243824	0.05	0	0	3.5	3.15	18.72	0	0	0	0	63.15	0.88
101243827	14.94	23.33	26.94	15	13.59	17.31	31.57	31.74	26.01	4.3	12.54	4.9
101243829	15.96	53.06	55.41	2.83	7.15	5.39	50.72	49.84	51.89	6.88	4.11	4.17
101243831	122.29	172.25	130.98	74.25	55.3	47.08	118.81	178.23	115.32	127.8	50.75	23.13
101243834	13.35	16.76	12.6	3.46	2.94	3.74	15.61	25.47	15.95	5.62	3.84	1.69
101243835	6.99	8.17	10.88	21.97	26.09	22.21	12.56	8.42	10.57	51.34	13.16	104.9
101243841	1.96	0.35	0.3	1.35	2.08	2.23	0.3	0.6	0.5	1.29	1.71	1.49
101243843	45.97	26.14	22.32	74.25	79.3	64.64	18.65	20.71	17.66	90.7	129.87	55.87
101243845	0.45	1.53	3.52	0.35	0.05	0.2	1.22	0.53	2.27	0.74	0.15	0.25
101243847	0.09	0	0	0.61	0.69	1.1	0	0	0	1.03	1.04	3.01
101243850	31.91	37.95	33.61	16.71	15.56	16.08	47.11	58.14	43.25	7.54	12.42	8.17
101243852	6.97	3.53	2.03	8.13	8.71	7.51	2.48	1.87	3.03	6.48	9.48	7.72
101243853	0.7	0.04	0.17	7.25	8.07	4.44	0.04	0	0.21	10.84	0.88	0.92
101243860	4.87	1.63	1.17	4.84	5.46	5.17	0.67	1.25	1.32	4.56	2.39	6.49
101243862	2.1	1.17	0.83	2.76	2.66	2.49	0.85	1.43	1.16	3.89	2.89	4.23
101243864	401.1	297.31	330.21	918.67	801.97	990.37	347.34	204.87	344.1	781.32	637.41	1157.67
101243865	0.49	0.47	0.19	0	0.31	0.04	0.34	0.62	0.52	0.04	0.04	0.15
101243866	4.69	3.12	1.46	5.62	5.37	6.2	2.09	3.08	2.71	3.89	3.35	8.19
101243868	5.94	5.02	3.91	16.68	12.61	8.25	2.83	3.31	2.72	21.36	6.15	16.01
101243870	2.02	0.16	0.55	0.73	1.24	1.05	0.33	0.11	0.27	0.9	20.56	1.51
101243871	14.42	10.61	9.96	9.78	8.45	11.48	14.52	17.6	16	3.74	6.93	5.64
101243873	0.52	0.88	0.9	1.63	1.73	2.25	0.3	0.45	0.25	5.53	1.69	13.55
101243876	5.13	6.64	6.32	3.58	5.66	5.38	7.27	6.68	6.76	6.2	11.62	8.73
101243878	13.64	9.4	9.25	33.52	31.26	31.45	16.79	12.37	12.43	34.58	25.5	45.39
101243879	15.46	14.69	11.81	4.81	4.22	4.07	14.37	19.46	16.95	3.14	2.88	2.41
101243886	30.36	28.44	18.19	27.09	37.06	14.11	15.39	23.77	18.94	47.88	25.78	96.09
101243887	20.27	24.02	26.14	28.9	51.77	46.12	31.09	26.97	33.13	60.77	57.97	63.91
101243888	1.74	2.85	2.06	0.29	0.03	0.19	2.66	4.42	3.31	0.03	0.06	0.03
101243889	1.54	4.43	4.4	14.54	26.58	26.28	10.86	15.07	10.35	11.27	10.96	27.77
101243890	30.05	19.96	23.7	61.45	70.42	68.53	22.37	20.03	18.72	54.61	41.99	113.25
101243892	0.96	0.88	1.23	0.29	0.1	0.47	1.23	1.11	1.54	0.1	0.1	0.14
101243894	39.61	22.15	20.14	35.73	41.26	30.59	13.42	14.13	15.57	248.63	30.69	221.14
101243897	1.14	97.79	1.67	3.71	3.02	1.62	4.41	1.53	2.87	6.67	295.78	3.57
101243899	19.32	32.85	33.25	9.32	13.53	12.05	38.14	42.48	41.68	14.12	16.37	14.13
101243902	6.39	3.06	1.28	3.26	3.67	4.61	1.81	2.33	2	4.02	3.89	4.19
101243904	40.71	39.34	34.36	24.23	23.17	21.83	10.04	11.7	10.01	5.98	4.91	4.22
101243907	61.51	6.12	15.78	271.61	270.76	399.67	7.34	1.91	15.43	140.3	138.32	351.19
101243908	7.51	5.53	5.72	20.05	15.52	16.84	7.16	5.6	4.54	3.43	7.71	12.56
101243909	0.86	2.08	2.13	0	0.41	0.3	1.44	2.52	0.83	0.3	0.1	0.1
101243910	9	9.66	8.5	1.74	1.26	2.31	12.03	15.24	11.42	1.3	0.54	1.37
101243911	25.48	1.13	4.58	0.04	0.06	0.25	0.52	0.83	0.55	0.22	0.18	0.11
101243917	101.78	38.8	39.54	187.9	86.09	134.32	51.76	35.77	45.85	32.97	62.57	83.62
101243919	5.01	9.38	9.08	2.37	6.28	6.21	11.19	8.44	9.72	2.91	1.75	4.22
101243920	14.62	4.02	2.42	13.33	11.92	11.56	3.01	3.47	2.91	15.42	16.6	14.47
101243922	70.51	104.54	100.36	94.45	126.04	124.21	86.37	102.52	85.57	936.92	69.27	487.37
101243924	0	0.57	1.48	3.62	4.31	6.67	1.77	0.28	0.3	5.79	3.73	5.65
101243925	7.28	18.79	16.57	3.8	6.24	6.35	24.36	28.08	22.95	1.93	1.97	3.08
101243926	0.44	0.41	0.26	1.05	1.61	1.04	0.38	0.37	0.45	1.06	0.48	1.04
101243929	30.52	0.95	21.54	2.97	2.87	4.14	2.67	3.2	2.76	1.71	171.31	4.7
101243932	4.56	3.28	5.56	22.64	35.39	13.89	12.38	10.77	7.5	20.07	104.52	25.56
101243933	3.09	2.85	1.94	1.73	2.07	3.19	3.33	3.81	3.47	0.54	1.95	0.41
101243935	18.89	14.78	12.8	35.65	19.52	25.15	12.36	16.86	13.41	25.2	20.67	37.6
101243937	0.08	0.07	0.06	3.33	3.47	16.48	0.23	0.15	0.13	0.04	54.64	1.12
101243945	0.11	0.15	0.05	0	0.05	0.05	0	0	0.05	0	6.4	0.05
101243946	0	0	0.16	1.27	0.96	0.47	0	0	0	0	500.06	0.63
101243947	4.92	5.45	4.37	8.71	14.42	7.56	4.68	7.82	5.61	10.34	15.93	11.83
101243953	11.26	26.1	26.28	3.59	12.53	4.78	30.65	35.33	18.47	6.36	4.44	5.44
101243960	3.21	1.44	2.65	0.06	0.32	0	0.31	0.12	0.18	0.38	0.19	0.19
101243971	0.13	0.04	0.04	0.18	0.34	0.06	0.01	0.05	0.05	0.22	0.8	0.09
101243972	2.22	0.16	0.25	1	1.23	3.43	0.2	0.11	0.11	0.93	5.31	0.94
101243975	35.36	16.61	10.3	49.67	43.32	51.01	12.81	12.29	15.65	4.93	52.47	1.61
101243979	1.63	0.33	0.4	0.96	1.84	1	0.67	0.32	0.4	2.77	1.16	1.49
101243980	5.46	2.32	1.4	6.01	5.53	6.81	1.61	2.46	2.4	5.77	5.11	6.92
101243983	13.05	16.81	15.38	5.69	6.66	6.9	15.82	15.08	16.69	6.15	5.82	5.24
101243985	1.13	0.37	0.35	1.78	1.74	1.48	0	0.03	0.06	1.7	0.78	2.29
101243993	3.93	2.71	1.99	1.69	1.42	1.9	2.67	4.61	3.66	0.62	1.05	0.95
101244000	0.04	0	0.01	0	0	0	0.56	0.63	0.51	0.99	0.66	0.84
101244001	26.14	5.43	4.46	7.32	4.84	3.73	7.02	16.41	5.75	0.78	3.72	1.39
101244002	11.64	4.12	6.16	0.49	1.48	0.78	6.59	6.79	8.91	5.46	1.94	4.88
101244003	18.53	6.74	8.3	8.98	17.11	9.25	5.98	1.94	6.35	42.13	19.69	40.64
101244004	0	0	0	30.69	29.8	184.1	0	0.04	0	0.05	468.12	7.81
101244007	0	0.11	0.04	0.46	0.54	0.49	0.04	0.07	0	0.11	0.77	0.19
101244011	0.19	0.03	0	0.59	0.5	0.18	0	0	0	0.34	0.12	0.59
101244012	31.59	31.1	29.14	10.24	18.66	16.05	28.88	38.69	39.98	18.84	24.83	12.09
101244013	104.12	92.54	92.84	240.51	279.25	263.12	82.65	84.68	77.42	176.14	330.33	185.14
101244014	13.21	15.48	12.97	4.09	5.41	5.94	14.16	16.67	16.89	5	2.74	4.26
101244015	2.6	5.22	4.06	1.03	1.74	0.91	3.94	5.33	4.05	2.31	0.47	3.78
101244018	9.46	9.57	7.06	4.97	4.72	5.44	8.29	9.88	9.33	4	4.26	3.19
101244023	3.6	0	0	1.03	1.15	4.83	0	0	0	0.05	36.09	0.66
101244031	11.2	9.62	10.27	10.37	10.26	13.51	8.25	8.2	9.27	14.83	14.31	16.08
101244032	7.77	8.27	6.25	7.48	15.24	13.3	7.15	6.16	5.21	14.67	8.77	16.01
101244036	49.3	33.43	39.18	117.48	119.59	155.51	29.37	17.91	29.24	53.35	58.71	99.22
101244038	40.59	23.98	18.01	17.13	18.06	15.64	30.07	44.91	28.46	12.61	15.88	14.16
101244039	8.33	12.39	10.94	1.87	3.25	2.26	11.89	15.01	13.6	4.63	1.87	2.91
101244041	15.72	9.3	10.99	38.07	34.03	49.4	11.14	8.12	13.8	16.91	23.07	24.96
101244042	2.43	1.67	0.75	0.61	0.36	0.5	1.72	2.64	2.07	0.11	0.47	0.39
101244043	14.75	7.4	5.6	5.22	5.71	5.92	7.04	11.98	9.09	1.91	5.23	1.81
101244045	3.09	0.83	1.4	5.97	7.27	6.8	2	1.13	1.98	4.55	13.86	6.53
101244047	3.84	2.68	1.91	7.22	8.03	7.25	2.61	3.15	1.87	12.41	5.04	25.73
101244049	1.29	5.06	3.52	0.18	0.33	0.2	8.91	15.78	9.16	0.05	0.1	0.05
101244054	0.8	0	0.24	3.42	4.09	2.89	0.36	0	0.29	0.91	1.52	2.77
101244057	28.31	6.83	8.82	0.08	0.32	0.28	8.14	4.44	11.39	0.33	0.4	0.04
101244058	16.72	22.56	29.03	26.03	32.43	39.36	22.62	19.48	27.55	81.94	25.94	64.52
101244060	2.75	3.13	2.61	27.98	12.01	28.37	5.03	2.1	2.5	12.16	16.22	30.16
101244061	0.05	0	0	0.37	0.21	0.91	0.05	0	0	0	2.52	0.05
101244069	11.37	9.16	6.61	7.35	6.08	9.88	13.26	12.92	10.94	3.93	6.67	5.62
101244074	107.35	0.32	0.45	3.26	7.14	5.23	0.26	0.18	0.36	2.36	3.23	3.24
101244075	0.25	0.26	0.04	0.21	0.54	0.87	0.45	0.16	0.24	0.59	1.04	1.5
101244077	0.39	0.25	0.03	0.08	0.05	0.05	0.36	0.41	0.48	0.08	0.08	0.16
101244079	9.31	1.05	0.6	0.72	0.58	0.33	0.44	1.55	0.56	0.1	0.38	0
101244080	49.46	51.82	54.7	15.75	24.47	13.78	44.22	44.35	63.78	49.58	27.42	51.93
101244084	887.69	1193.9	1284.03	680.28	522.02	658.61	1616.31	1761.59	1609.31	370.71	525.25	499.38
101244085	0.42	1.91	1.98	0.32	0.61	0.44	2.8	4.05	2.17	0.76	0.19	0.48
101244087	3.1	2.55	1.96	1.98	1.64	2.97	1.65	1.84	2.32	2.93	10.68	1.72
101244088	22.55	15.04	22.74	50.38	48.16	62.16	25.02	15.41	23.22	14.26	28.48	33.46
101244091	0.39	0.24	0.2	0.32	0.23	0.31	0.27	0.04	0.2	0.11	8.35	0.11
101244092	9.08	27.22	41.58	2.49	4.2	5.45	60.86	73.08	53.42	3.34	5.53	3.56
101244100	28.61	94.47	98.17	71.98	119.38	180.34	64.94	66.28	45.15	27.88	43.8	44.08
101244101	0.17	0.03	0.07	3.31	6.25	3.87	0.21	0.1	0.61	3.52	0.81	9.26
101244103	2.6	1.93	1.22	1.69	2.02	1.88	3.16	1.21	6.17	3.47	3.22	3.1
101244107	58.84	63.04	54.86	24.91	27.81	30.97	71.39	86.81	67.46	27.5	24.87	20.07
101244113	60.04	34.39	31.03	81.16	87.99	108.36	53.35	47.59	61.11	46.12	78.63	57.14
101244123	374.08	314.51	297.18	192.54	151.85	130.29	290.29	316.39	299.64	129.73	207.99	78.89
101244124	16.3	23.85	25.69	51.12	54.85	49.08	18.56	15.03	21.62	66.8	72.62	55.73
101244128	4.94	3.21	2.5	9.63	4.92	6.04	1.25	0.96	1.64	7.9	5.48	4.62
101244131	55.46	31.16	25.62	41.31	55.94	33.56	18.7	14.72	19.26	25.06	37.63	25.61
101244133	11.05	5.07	3.56	2.01	2.48	1.94	3	3.44	3.99	0.84	1.76	0.39
101244135	17.73	19.92	17.55	11.2	12.66	10.48	26.69	32.49	27.01	43.32	12.35	47.14
101244136	0.73	0.87	1.28	2.7	1.67	4.09	1.19	1.88	1.2	17.17	3.82	15.58
101244139	187.15	156.87	206.54	320.86	427.85	469.52	201.42	148.46	199.08	294.45	512.8	365.99
101244140	2.62	1.88	1.92	1.07	0.63	0.92	1.49	1.88	2.85	1.11	0.85	0.58
101244141	0.35	0.05	0.34	0.15	0	0.1	0.29	1.53	0.19	0.05	0.05	0
101244142	42.37	58.79	57.53	128.43	121.38	92.76	46.91	67.62	53.54	80.56	56.89	127.66
101244143	0.96	0	0.09	6.14	5.77	4.8	0	0.18	0.28	13.62	9.06	30.49
101244145	13.2	22.51	24.65	24.17	31.67	26.04	24.41	24.07	23.28	44.94	25.26	59.18
101244150	5.98	20.04	20.49	3.3	3.52	3.05	31.01	35.66	27.23	1.96	1.81	3.25
101244154	3.42	1.2	0.45	1.65	1.44	0.77	0.7	1.19	1.07	5.35	2.92	1.57
101244164	2.47	0.76	0.8	6.19	4.05	4.94	0.94	1.14	0.62	2.18	2.48	5.16
101244166	3.58	0.61	1.2	0.08	0.36	0.62	0.35	0.11	0.23	0	21.95	0.16
101244167	71.66	69.84	73.23	429.87	786.58	589.29	93.42	46.26	95	180.44	318.05	159.25
101244173	2.52	1.76	1.53	1.31	1.06	1.31	2.55	3.4	2.41	0.39	0.98	0.59
101244174	16.54	22.71	23.5	5.24	3.73	8.2	38	40.92	29.25	3.69	6.87	6.11
101244175	0.11	0.56	0.42	0.37	0.32	0.47	0.52	1.12	0.72	1.9	1.12	1.58
101244176	41.93	49.93	58.66	62.32	53.77	52.06	62.82	40.66	55.08	148.41	32.31	297.75
101244177	2.99	0.85	0.64	14.6	16.99	11.72	0.76	1.12	3.57	8.22	9.91	21.92
101244182	0.61	0.33	0.26	0.65	1.07	0.26	0.26	0.33	0.26	1.1	0.27	0.99
101244183	18.34	21.43	18.74	8.79	9.81	9.68	17.46	18.38	18.71	8.04	11.18	8.32
101244192	2.03	0.95	0.82	1.28	1.16	0.16	0.98	0.92	0.85	2.61	1	1.94
101244193	51.33	52.15	46.65	26.76	32.67	29.18	62.36	77.87	56.96	24.2	35.02	21.16
101244194	9.02	18.95	17.5	9.9	12.25	13.16	27.6	36.04	34.79	6.57	10.43	7.13
101244195	1.08	1.21	0.68	0.24	0.21	0.5	1.09	1.36	1.13	0.15	0.69	0.96
101244196	29.09	65.02	62.95	19.1	23.73	17.43	50.89	38.3	57.42	79.11	19.43	37.06
101244199	2.12	2.77	2.87	2.97	2.58	2.6	4.72	4.9	4.21	6.65	12.27	6.3
101244203	0.98	0.31	1.04	0.65	0.65	0.16	0.48	1.01	0.63	7.36	2.45	15.35
101244208	1.94	1.21	2.4	0.72	0.84	0.52	1.76	1.69	1.99	0.79	0.84	0.31
101244210	37.74	47.05	45.37	29.37	67.1	41.44	22.7	20.29	21.28	92.25	52.66	84.45
101244220	14.07	21.79	17.12	30.13	48.46	42.7	16.55	19.65	13.04	53.25	10.63	67.74
101244223	1.59	2.81	2.11	0.52	0.26	0.47	2.99	3.77	3.23	0.12	0.1	0.25
101244224	13.83	15.61	14.93	9.41	11.21	13.45	16.8	19.47	19.25	7.62	8.45	6.98
101244228	18.05	11.68	7.83	2.31	1.13	2.04	12.98	21.05	16.4	0.73	0.17	1.43
101244233	0.05	2.52	3.41	0.05	0.25	0.05	2.49	3.96	1.83	0	0	0
101244234	0	0	0	0	7.9	0	0	0	0	0	0.21	0
101244235	0	0	0	4	2.93	19.73	0	0	0	0	51.74	0.96
101244237	22.64	48.3	50.26	46.39	73.48	46.74	44.5	34.53	54.95	148.01	51.73	86.28
101244240	7.98	11.97	10.65	2.36	2.71	2.51	13.51	17.71	14.15	3.03	2.64	1.48
101244241	84.74	69.11	65.43	136.98	112.36	105.45	45.43	46.61	54.91	144.01	181.53	171.32
101244243	11.64	0	0	0	0	0.05	0	0	0	0.05	0.05	0
101244244	0.14	0	0	0.55	0.56	0.27	0	0.13	0	0	856.29	0.96
101244251	2.58	3.19	1.83	1.28	1.15	0.97	2.62	3.42	1.98	2.31	0.85	2.01
101244253	1.68	0.99	0.31	10.27	10.28	59.14	0.39	0.38	0.16	0.08	150.19	4.05
101244257	27.08	15.46	9.15	10.73	9.68	9.56	14.18	23.79	17.01	27.86	12.48	26.55
101244259	2.75	0.04	0	0.27	0.07	0.26	0.02	0.07	0.07	0.2	0.11	0.23
101244265	996.35	227.44	231.16	3454.9	1189.53	540.98	83.16	28.28	70.14	9460.23	3500.65	4208.83
101244266	3.38	1.64	1.38	17.07	40.69	1.74	1.93	1.88	2.15	4.11	88.86	3.89
101244268	2.18	3.4	1.75	0.33	0.31	0.51	6.07	0.48	13.31	0.21	0.62	0.24
101244269	3.34	7.57	5.36	2.91	3.3	2.42	9.43	6.36	15.34	4.19	4.23	1.8
101244273	1.76	0.56	0.38	1.05	1.84	1.54	0.32	0.19	0.38	2.53	1.12	1.43
101244280	7.1	5.03	3.83	22.03	21.92	26.42	3.04	3.13	3.17	24.49	15.34	33.64
101244282	6.6	3.06	1.83	5.56	13.14	7.72	1.31	1.79	0.93	9.37	3.79	9.12
101244283	0.73	1.54	1.35	0.54	1.07	0.65	0.87	1.17	1.22	0.44	0.29	0.34
101244285	60.51	57.59	52.12	123.79	168.26	121.24	57.52	66.92	67.42	102.02	86.29	159.79
101244286	5.36	2.41	1.45	0.64	0.43	0.68	2.55	4.99	2.65	0.46	0.12	0.6
101244289	0.24	0.05	0.1	0	0	0.05	0.29	0.28	0.14	0	0	0
101244290	0.22	0.1	0.05	0.6	0.76	1.27	0.11	0	0.08	0.54	13.14	1.52
101244292	1.21	0.54	0.22	0.64	0.8	0.87	1.87	2.46	1.72	4.02	2.6	3.73
101244293	57.99	40.9	45.78	42.92	31.6	49.65	35.72	36.01	42.33	47.23	116.98	87.59
101244297	37.62	20.93	18.36	35.03	47.07	61.08	16.78	16.35	19.68	41.64	33.4	62.93
101244298	39.1	48.22	56.76	96.42	50.99	102.05	27.81	20.21	35.68	174.05	90.53	176.99
101244300	0	0	0	0.93	0.4	0.26	0	0	0	8.73	0	0.46
101244304	40.64	20.53	18.19	74.07	59.92	73.38	22.52	20.21	21.63	32.73	55.75	38.36
101244305	0	0	0	0.18	0.1	0.18	0	0	0	0	19.8	0.05
101244306	4.8	3.79	3.41	3.35	2.3	4.09	5.05	5.91	6.21	1.11	3.36	1.73
101244309	12.28	18.23	15.88	7	5.99	8.5	19.94	21.83	23.88	3.58	4.35	4.34
101244313	3.98	2.51	1.55	8.15	8.16	5.44	0.89	1.84	3.24	5.26	4.77	8.73
101244314	26.25	19.66	15.93	24.16	37.2	24.34	15.72	14.66	19.9	85.77	26.38	47.08
101244319	3.44	2.44	3.27	1.67	1.36	1.23	5.35	3.75	6.45	0.62	0.63	0.72
101244320	14.5	10.04	7.15	6.26	4.52	4.82	12.29	21.92	10.66	1.53	4.35	1.88
101244321	8.05	4.76	3.86	5.26	3.76	4.81	4.73	9.18	5.44	1.34	3.66	2.44
101244322	6.04	4.06	4.09	9.43	10.6	11.16	3.89	3.19	4.24	9.93	12.01	8.06
101244324	33.73	49.48	70.28	120.1	122.95	109.99	45.48	60.25	69.48	75.86	88.28	127.53
101244327	1.17	0.85	0.63	1.27	1.32	1.24	1.04	0.96	0.8	2.04	1.59	1.44
101244329	22.39	16.56	11.09	28.13	31.46	26.89	11.98	13.38	13.6	24.99	23.36	28.67
101244331	0.54	0.05	0	1.54	1.56	6.95	0	0	0.03	0	18.18	0.48
101244335	0.38	0.48	0.25	0	0	0	0.74	0.48	0.49	0.06	0	0.31
101244346	89.18	115.37	116.89	44.64	32.79	38.76	205.51	227.7	186.74	49.54	33.11	72.1
101244348	58.8	83.51	74.03	27.86	36.91	41.84	78.36	87.11	83.98	33.02	81.72	24.42
101244352	2.51	0.84	0.47	2.17	2.5	2.89	0.52	0.55	0.64	2.17	1.46	2.05
101244354	13.51	6.15	5.7	113.57	96.8	94.43	5.44	6.08	6.37	135.53	213.33	258
101244358	0	0	0	1.73	1.61	10.6	0	0	0	0	26.9	0.6
101244360	9.56	10.14	6.69	2.36	3.48	2.37	10.56	12.31	9.77	4.23	3.86	1.29
101244365	656.95	298.01	437.39	127.26	137.71	88.29	150.85	51.71	228.58	124.69	117.45	43.42
101244367	21.84	17.6	18.5	11.45	10.85	10.68	30.88	32.33	22.89	2.43	8.22	3.55
101244368	40.8	45.4	45.98	22.83	22.62	23.68	52.89	63.57	57.05	18.21	18.82	17.68
101244370	29.26	60.51	68.18	64.26	62.06	99.93	37.54	32.37	50.52	97.29	53.26	103.34
101244374	21.58	16.63	13	11.23	9.47	10.87	18.23	25.48	18.35	7.02	9.5	6.71
101244375	0.04	0	0	12.08	12.69	12.76	0.04	0	0	0	450.05	5.09
101244376	0	0.48	0.77	0	0.05	0	1	0.85	0.86	0	0	0
101244390	0	0	0.02	0.48	0.16	0.07	0.02	0	0	0.21	0.02	0.21
101244394	0.93	0.38	0.35	0.65	0.72	1.35	0.35	0.21	0.47	1.07	0.7	0.93
101244395	3.58	0.1	0.05	0	0	0.05	0.3	0.1	0.1	0	0.05	0
101244399	2.61	0.76	1.71	40.82	47.82	30.31	1.17	0.99	9.34	37.11	7.3	38.53
101244408	24.71	21.81	19.64	43.36	51.85	58.54	24.62	23.01	23.48	31.59	32.25	52.69
101244410	2.21	0.16	0.05	0	0	0	0	0.02	0.19	0	0.34	0
101244412	36.44	31.65	24.32	45.8	31.12	39.19	35.75	40.17	26.08	3.11	24.3	4.6
101244414	4.9	5.52	4.92	1.82	2.56	2.43	5.07	5.31	6.25	1.81	1.89	1.26
101244417	27.45	24.44	34.81	46.5	35.68	33.24	33.67	32.12	36.69	64.88	48.79	81.68
101244426	2.55	1.16	0.65	15.71	25.8	12.96	0.36	0.52	0.53	10.25	8.59	17.21
101244429	2.18	20.94	13.33	0.55	1.86	0.8	14.18	15.79	6.34	5.09	0.82	2.01
101244430	121.85	389.69	180.72	44.34	48.58	49.44	138.4	47.19	119.82	71.54	107.08	32.33
101244431	0	0.21	0.16	0	0	0	0.32	0.58	0.41	0	0	0
101244432	7.62	5.94	3.02	9.35	7.62	6.98	3.77	6.07	4.41	11.94	8.74	14.84
101244433	1.6	1.68	1.84	5.58	6.38	5.81	2.52	2.18	2.04	6.12	5.84	8.85
101244435	19.6	20.07	18.74	59.19	69.36	35.01	10.85	12.19	14.78	37.67	81.66	29.17
101244438	0	0.18	0.23	0	0	0	0.61	1.32	0.23	0	0	0
101244440	0.27	0	0.26	1.91	2.58	2.28	0	0	0	5.08	2.3	18.33
101244441	10.32	14.2	10.61	8.59	8.29	8.33	14.93	10.57	14.65	37.29	6.6	56.46
101244445	18.09	13.27	10.83	23.29	33.63	30.21	8.31	7.54	10.48	24.35	24.11	25.15
101244450	87.57	58.06	75.24	174.76	136.96	169.99	70.68	52.77	83.15	101.74	157.86	122.85
101244454	5.48	3.5	2.85	0.61	0.44	1.02	4.69	5.06	5.11	0.23	0.35	0.35
101244455	8.19	7.19	5.57	0	0	0.24	5.82	3.54	6.7	0.03	0.03	0.03
101244460	1.82	1.4	1.05	3.67	3.87	2.69	0.91	0.77	1.16	3.82	3.85	3.54
101244463	18.81	52.17	45.8	7.54	25.4	14.04	43.3	41.46	34.23	5.65	11.34	3.33
101244464	381.23	430.36	484.6	159.07	161.36	142.72	742.45	947.81	600.79	125.24	148.69	115.33
101244465	7.88	9.85	10.11	0.21	0.21	0.2	15.18	36.12	13.15	0.21	0.35	0.21
101244466	45.88	33.79	29.53	87.85	87.26	83.72	33.55	27.08	37.97	113.63	82.41	125.89
101244469	46.38	29.37	24.39	69.72	62.18	71.88	29.4	34.24	30.95	94.06	67.65	42.74
101244471	0.15	0.05	0.05	2.08	1.93	1.93	0.24	0.38	0.24	6.9	2.27	23.11
101244472	7.97	10.98	7.83	6.13	7.95	7.19	10.41	13.25	7.63	3.73	3.17	4.48
101244473	12.87	17.19	17.04	12.15	19.24	18.02	11.15	9.31	10.9	13.33	30.55	13.06
101244475	39.73	14.68	14.89	50.99	49.02	38.64	9.51	9.15	11.17	40.21	52.02	33.78
101244485	9.01	8.68	8.44	13.59	19.71	20.48	8.65	8.2	10.15	9.75	10.89	14.64
101244489	4.21	2.76	2.53	9.34	10.85	6.3	4.05	5.61	3.17	16.26	14.66	13.44
101244491	4.56	0.48	0.62	4.88	5.92	2.45	0.57	0.65	1.47	6.39	8.7	4.3
101244493	1.05	0.11	0.02	1.1	0.75	0.59	0.11	0.13	0.06	3.42	1.88	0.58
101244494	0.11	0.14	0.24	0.11	0.11	0.07	0.27	0.24	0.21	0.04	17.83	0.04
101244496	59.56	75.24	82.11	25.84	42.17	36.81	70.17	73.27	66.19	92.17	24.43	73.18
101244503	38.69	92.65	103.69	11.22	7.78	8.75	121.36	122.5	126.34	33.36	55.43	13.03
101244508	0.28	1.54	0.52	0	0	0	3.76	0.09	8.44	0	0.06	0
101244509	1.1	0.42	0.27	0.51	0.25	0.81	0.14	0.11	0.04	0.55	49.68	1.59
101244511	1.86	1.14	1.52	0.51	0.65	0.66	1.45	1.8	1.52	1.01	2.45	0.36
101244513	0.2	0	0.4	1.95	0.72	2.11	0.1	0.19	0.4	3.54	0.1	14.54
101244514	11.16	26.68	30.71	16.45	38.19	29.65	22.03	16.02	15.4	49.33	27.23	25.39
101244515	24.41	22.27	20.46	56.04	74.39	82.39	19.3	17.02	18.9	96.41	69.88	122.47
101244516	7.92	8.84	6.45	1.8	1.6	2.41	7.94	14.67	8.51	1.17	0.33	0.97
101244523	2.49	3.78	3.67	1.81	2.78	2.92	5.57	8.34	4.17	7.58	4.39	11.51
101244526	0.4	0.29	0.17	0.07	0.03	0.08	0.32	0.74	0.54	0	0.14	0
101244527	1.48	6.4	4.99	0.8	0.8	0.9	6.61	12.37	6.14	0.68	0.57	0.85
101244528	3.99	0.4	1.15	6.4	7.78	7.63	1.55	1.2	2.37	27.29	6.38	63.97
101244530	3.07	0.75	0.57	0.27	0.15	0.21	1.02	1.17	1.39	0.33	0.57	0.22
101244532	31.05	39.87	34.1	23.86	29.28	21.17	46.13	55.16	42.66	23.35	20.98	17.07
101244535	34.93	24.36	19.96	39.27	24.39	35.71	32.04	31.44	25.9	3.87	18.11	9.44
101244536	1.45	15.28	8.98	0.07	0.36	0.14	34.53	32.51	40.75	0	0	0.14
101244537	0.29	0.3	0.29	0.79	1.6	1.34	0.39	0.4	1	0.93	0.35	0.5
101244541	0.36	0	0	0.12	0.24	0.71	0	0	0	0	467.38	1.31
101244542	5.77	2.02	1.64	1.13	1.06	1.21	2.75	2.73	2.67	1.15	3.35	1.02
101244544	11.36	9.13	17.39	38.7	34.63	54.24	16.36	7.17	17.25	34	34.95	43.25
101244545	28.72	42.51	33.17	5.66	7.7	6.42	30.94	44.26	40.57	5.89	13.34	4.81
101244550	40.2	50.55	46.03	29.83	31.73	29.96	53.76	60.9	58.59	27.26	22.08	25.12
101244553	1.67	0.74	0.43	0	0.03	0.03	1.43	1.71	1.11	0.03	0.03	0.03
101244560	28.11	23.76	25.99	50.62	55.38	73.74	22.32	18.08	27.48	38.66	32.54	51.75
101244562	2.92	1.17	1.02	34.07	28.61	8.84	1.26	0.87	1.24	32.29	16.89	5.88
101244563	26.44	25.1	24.39	24.35	29.5	24.86	19.83	16.58	26	35.23	33.11	75.18
101244569	0.33	0.3	0.26	0.04	0.1	0.02	0.18	0.22	0.3	0.12	0.21	0.04
101244570	27.7	7.57	5.56	0.9	3.56	1.33	7.57	8.64	11.16	36.36	19.37	1.59
101244571	26.3	32.19	28.32	11.76	11.08	12.5	32.84	34.67	35.18	5.59	8.73	6.88
101244577	56.88	63.16	74.28	49.92	66.63	55.05	68.51	69.32	70.97	172.84	144.97	126.85
101244579	46.99	29.82	22.36	12.18	14.14	12.6	32.85	46.16	32.64	9.98	15.13	8.28
101244581	61.32	32.58	25.23	147.67	160.23	165.93	30.27	25.02	23.12	97.63	81.33	149.44
101244582	3.79	0.17	0.13	16.06	11.19	16.01	0.09	0.09	0.7	38.83	8.38	32.23
101244583	32.18	27.88	24.91	16.37	15.64	18.43	30.4	37.76	32.11	5.43	11.23	6.71
101244584	84.37	0.76	1.55	4.25	6.06	6.28	0.42	0.41	0.7	4.29	4.55	7.5
101244586	26.79	35.18	36	16.6	17.56	16.54	40.89	40.7	37.22	19	16.6	13.14
101244590	22.07	17.21	17.33	50.71	50.43	69.95	17.65	12.98	19.63	14.06	36.11	25.18
101244592	81.78	105.53	116.81	69.04	54.97	81.02	125.15	110.75	121.79	30.82	42.49	21.8
101244596	1.72	0.09	0	0	0	0	0	0	0	0	8.36	0.09
101244597	15.19	23.84	21.61	2.39	3.17	2.71	19.01	27.03	17.67	2.18	2.78	1.6
101244598	14.17	14.82	13.56	31.85	33.92	30.06	10.84	13.12	13.99	87.35	21.08	77.15
101244600	0.08	0.36	0.32	0.25	0.25	0.49	1.14	0.08	2.16	0	0.12	0.08
101244601	47.51	49.92	50.09	29.76	19.66	25.65	67.46	82.51	53.61	20.97	25.97	24.68
101244602	6.33	3.89	1.87	1.38	2.6	2.6	6.27	4	9.83	2.04	3.74	2
101244604	561.4	640.33	609.93	313.4	276.36	256.49	816.19	1014.41	723.73	247.91	264.2	244.64
101244606	6.91	9.21	14.72	34.57	22.6	35.75	5.91	2.97	11.11	20.28	9.88	31.27
101244607	267.63	267.02	257.91	110.38	98.21	108.97	346.65	528.83	309.47	55.84	70.26	57.62
101244611	83.03	90.73	89.1	40.73	43.44	41.64	121.59	161.4	112.13	36.15	41.8	35.78
101244612	13.22	4.11	2.7	11.94	7.94	11.06	4.06	3.54	4.12	3.15	5.63	3.57
101244616	0.16	0.03	0	2.69	2.71	16.89	0	0.03	0	0.03	31.57	0.66
101244617	257.94	275.19	272.43	123.99	150.67	130.2	396.63	545.74	369.97	177.82	104.02	162.8
101244618	3.75	0.23	0.18	0	0.09	0.04	0.25	0.21	0.7	0.54	0.33	0.02
101244620	59.54	52.86	48.94	25.94	22.64	29.04	76.35	95.21	78.19	15.55	24	18.93
101244623	1.5	0.47	0.78	96.05	220.62	30.15	1.79	2.17	2.12	12.25	293.05	14.27
101244624	19.18	5.4	6.54	4.76	1.15	1.89	3.35	3.18	6.56	1.9	2.9	1.69
101244627	0.26	0	0.05	1.11	0.21	1.86	0.21	0.2	0.31	0.52	0.32	0.1
101244630	0.23	0	0	0.06	0.06	0.08	0	0	0	0	1.69	0
101244632	1.54	5.08	3.2	0.69	0.73	1	4.36	9.46	5.94	0.36	0.67	0.45
101244634	39.68	45.25	47.43	33.36	29.35	26.93	57.68	63.88	46.76	62.35	49.72	57.93
101244635	4.31	2.2	1.31	1.41	1.33	0.98	0.36	0.85	0.57	2.16	1.44	1.95
101244640	8.06	14.82	14.44	1.36	3.16	2.62	37.79	46.02	50.82	3.16	2.46	3.09
101244650	2.05	0.79	0.56	3.1	2.06	3.98	0.89	1.19	0.79	6.08	3.34	1.06
101244652	0.26	0.16	0.5	8.39	4.2	2.01	0.17	0.16	1.41	6.03	0.86	2.8
101244658	6.2	7.16	6.77	3.95	5.15	4.43	11.29	13.25	10.36	3.59	3.61	2.64
101244659	0.28	0.53	0.77	0.05	0.05	0	0.68	0.94	0.99	0.51	0.09	0.55
101244663	4.08	3.02	3.08	5.81	5.66	5.03	2.85	3.01	3.33	6.14	3.75	7.86
101244665	0.24	0.16	0.16	0.24	0.69	1.43	0.04	0.16	0.2	1.21	1.22	2.26
101244667	10.3	3.02	2.21	20.33	19.97	25.71	1.5	2.18	2.31	28.02	16.96	37.95
101244668	0.78	0.4	0.63	0	0.1	0.1	0.75	0.57	0.47	0.46	0.1	0.46
101244671	2.07	4.15	1.19	0	0.23	0.03	8.42	0.12	16.77	0	0.1	0
101244672	52.07	18.74	17.62	2.3	2.61	2.72	18.45	24.94	26.46	3.1	11.96	3.06
101244674	48.67	31.91	28.5	102.7	92.16	112.32	25.77	16.64	25.74	84.83	57.54	126.26
101244677	0.18	0.1	0	74.71	85.96	489.01	0.1	0.61	0.17	0.17	1838.13	29.46
101244686	0	0	0.01	0	0.01	0.04	0	0	0.01	0.23	0	0.06
101244694	8.81	6.95	5.34	14.62	14.36	19.03	5.93	5.31	5.74	14.91	16	33.24
101244695	7.11	11.29	9.49	1.55	1.95	1.67	14.4	17.94	13.76	0.69	0.81	1.06
101244696	1.54	0.94	0.84	6.1	6.31	10.89	1.64	1.32	2.48	3.91	1.67	8.23
101244697	59.61	33.02	43.75	138.09	98.11	142.63	32.72	24	26.02	49	50.1	109.61
101244699	13.47	14.3	13.87	33.15	48.06	43.19	10.59	8.68	12.21	49.01	36.45	45.52
101244700	22.7	14.1	17.72	41.03	73.36	65.19	10.23	11.25	14.49	93.42	65.89	62.48
101244701	5.03	4.58	4.46	4.44	4	4.94	5.25	6.26	5.25	1.39	2.05	1.42
101244708	18.94	18.22	17.76	18.7	16.72	18.76	17.16	17.34	15.37	5.04	10.5	8.07
101244709	35.44	54.27	68.58	58.28	53.88	74.17	60.89	56.8	58.25	16.46	34.82	27.82
101244710	17.69	12.45	11.51	25.91	29	26.8	11.72	11.04	13.78	22.38	26.03	23.46
101244713	2.07	2.33	2.58	1.22	1.74	1.42	2.93	4.04	3.18	0.52	0.87	0.24
101244714	4.57	2.04	1.43	8.27	13.37	6.97	3.42	3.5	2.17	13.62	19.65	19.94
101244716	2.59	8.82	10.16	5.58	3.43	2.76	1.66	2.4	3.05	9.1	2.13	5.17
101244718	166.34	152.44	162.19	75.2	33.34	52.1	199.26	218.18	175.58	33.8	97.84	40.56
101244719	7.69	5.44	3.61	5.37	8.61	5.27	3.82	4.23	5.1	9.56	5.75	8.75
101244720	6.13	2.36	1.63	12.5	9.22	9.54	2.29	2.61	1.68	14.37	9.3	21.73
101244725	6.11	31.28	25.24	20.47	16.62	17.31	36.55	38.71	22.48	74.69	32.25	43.43
101244726	5.06	15.91	10.45	1.85	2.47	5.98	7.94	9.57	8.81	2.23	2.42	6.98
101244727	6.06	5.11	4.69	7.41	9.3	8.31	4.03	4.35	4.41	12.98	9.3	10.8
101244730	6.38	5.58	4.08	1.93	2.41	3.38	5.11	8.54	6.86	1.69	6.71	1.87
101244732	0	0	0	1.7	2.01	1.28	0	0	0	3.28	2.22	18.03
101244734	0.51	3.84	2.64	0	0.25	0.17	10.39	0.4	9.58	0.17	0.25	0.08
101244736	243.18	209.35	184.6	110.41	96.49	102.83	285.23	427.76	231.72	72.13	77.23	71.61
101244745	1.56	7.02	7.59	0.94	3.84	2.07	5.13	6.63	6.07	0.54	0.16	0.78
101244747	50.15	22	20.17	63.12	63.16	61.16	14.94	11.69	21.47	15.68	66.86	1.56
101244748	0.8	0.28	0.19	1.22	2.89	2.1	0.25	0.25	0.28	0.41	0.77	1.02
101244752	11.89	4.51	5.17	21.84	17.68	30.93	5.56	3.84	6.05	8.74	12.12	13.8
101244753	1.74	1.7	1.45	0.63	0.52	0.73	1.98	3.09	2.45	0.04	0.58	0.21
101244762	2.88	2.73	2.57	5.97	5.43	7.4	3.12	3.12	2.95	1.85	2.88	2.97
101244764	0.04	0.02	0.02	1.57	1.04	6.6	0	0	0	0	12.44	0.24
101244768	9.96	1.36	1.39	0.91	0.74	0.42	0.8	0.85	1.55	1.07	2.19	2.2
101244769	14.74	9.05	6.07	13.45	14.49	15.2	7.29	6.64	8.8	13.13	13.9	14.5
101244772	65.64	53.02	45.09	31.51	27.3	35.57	60.24	66.26	54.68	23.23	37.1	18.92
101244774	1.03	0.09	0.05	6.5	3.93	3.89	0.05	0	0.05	0.54	10.23	0.83
101244775	0	0	0	0.28	0.09	0.83	0	0	0	0	15.17	0
101244777	41.99	73.16	81.31	31.26	24.78	35.74	90.2	75.76	95.99	16.39	22.47	14.42
101244781	15.7	6.35	6.56	12.41	15.85	18.81	5.52	4.78	7.42	15.28	9.52	21.19
101244782	8.23	8.42	8.26	5.26	6.42	7.15	8.92	9.07	8.99	3.53	4.58	3.33
101244787	13.78	7.43	5.89	5.21	4.07	6.66	7.72	10.41	9.23	3.51	3.94	3.36
101244788	2.24	0.76	0.62	0.93	0.91	1.23	0.87	0.76	1.12	2.43	1.79	2.31
101244789	0.8	0.18	0.19	8.49	8.91	2.04	0.37	0.23	0.69	3.05	2.42	4.75
101244790	46.76	25.56	25.84	13.78	15.41	13.96	24.27	21.36	25.65	18.45	86.28	8.67
101244797	12.55	8.29	6.79	15.23	27.46	18.47	5.44	5.03	7.67	9.14	12.74	8.21
101244799	155.12	242.32	234.28	89.55	61.57	82.49	366.74	490.33	358.46	27.57	68	36.8
101244800	4.36	1.62	0.67	0	0.3	0.54	62.27	89.72	64.07	15.28	13.51	10.18
101244806	14.09	125.5	8.68	0	0.12	0.17	40.98	0	34.43	0.06	0	0.12
101244810	0.1	0	0.05	1.35	1.68	1.31	0	0	0	0.14	0.14	0.14
101244816	0.87	0.57	0.54	2.34	1.38	1.82	0.86	1.07	0.69	0.59	0.88	1.86
101244819	5.58	5.83	6.49	16.03	18.12	14.43	3.63	4.73	5.34	15.64	23.99	8.27
101244820	2.63	2.47	1.76	0.9	1.09	1.12	3.46	4.84	3.87	0.41	0.97	0.63
101244822	0.3	0.21	0.16	0.81	0.86	2.61	0.09	0.1	0.09	0.29	10.76	0.65
101244823	13.55	0.08	0	0.07	0.02	0.08	0.13	0.1	0.06	0	0.93	0
101244824	17.63	13.23	13.03	8.03	8.83	8.11	16.24	20.36	14.85	4.75	6.98	6.84
101244826	26.98	26.28	29.77	16.14	18.84	12.18	36.12	42.44	37.42	12.88	15.25	8.15
101244827	16.16	5.41	13.9	17.87	36.23	14.56	4.3	3.48	5.56	8.91	41.26	8.28
101244828	29.78	33.9	28.03	8.44	5.72	8.31	44.08	55.06	48.04	3.09	6.4	5.66
101244829	0.54	1.24	0.65	0	0	0	4.73	0.02	9.28	0	0	0
101244833	50.06	37.13	42.55	100.09	75.6	96.42	44.48	31.55	33.43	27.67	52.2	40.31
101244837	2.99	4.8	5.76	5.89	5.22	6.66	4.27	1.86	5.08	14.43	6.58	5.89
101244841	29.82	35.05	36.14	29.31	31.23	32.73	42.65	39.89	40.03	16.34	29.9	14.1
101244843	17.92	17.5	21.56	76.79	64.01	88.77	16.21	14.83	18.96	44.31	56.2	65.24
101244852	0	0	0	0	0.26	0	0	0	0	0	1.14	0.17
101244854	57.66	53.7	52.09	98.43	128.93	139.22	55.32	49.26	51.74	66.23	94.52	80.18
101244859	34.65	12.7	12.36	27.05	32.89	90.27	11.48	12.55	9.39	13.17	255.17	14.81
101244865	0.11	0.02	0.04	0.06	0.11	0.15	0	0	0.02	0.21	0.24	0.11
101244866	0.49	12.03	8.37	0.19	0.11	0.07	6.92	10.36	8.06	0.11	0	0.3
101244867	2.45	1.83	1.55	4.57	6.23	5.57	1.71	2.04	1.21	8.26	12.21	1.86
101244869	1.55	1.17	1.32	0.63	0.36	0.65	2.7	3.43	2.11	0.42	0.93	0.4
101244872	0.02	0	0	0.05	0.1	0.11	0	0	0	0	2.14	0
101244873	3.15	4.8	3.01	0.45	0.36	0.09	3.23	5.11	2.92	0.09	0.09	0
101244876	10.69	7.28	7.2	9.74	7.72	8.23	2.55	3.13	2.74	0.44	5.17	1.13
101244879	3.53	5.77	5.35	9.84	10.8	12.69	6.25	5.35	7.04	3.26	12.95	0.99
101244882	577.26	506.74	615.51	1184.97	1200.49	1160.26	717.14	541.18	565.72	765.63	785.91	1157.24
101244883	9.55	2.17	1.53	7.81	6.17	8.29	1.27	1.47	1.73	3.12	3.69	3.4
101244884	7.29	2.87	2.1	11.78	10.89	6.73	2.76	3.78	2.83	15.33	5.54	13.79
101244887	14.68	19.72	15.79	8.78	9.88	6.05	11.25	12.24	9.43	12.51	2.49	3.91
101244892	209.06	199.67	167.14	119.23	107.32	113.02	214.2	292.98	201.86	84.18	99.71	91.46
101244893	14.53	37.43	27.1	0.68	1.31	1	30.03	43.15	31.03	0.9	0.74	0.28
101244894	26.65	14.5	20.3	144.52	137.74	137.4	40.53	21.91	14.51	66.53	57.18	259.62
101244901	10.15	10.37	9.9	4.89	5.12	5.12	10.22	11.88	11.8	4.35	3.59	3.74
101244902	110.33	84.17	86.88	38	21.9	29.48	136.73	194.69	111.82	13.69	29.19	18.45
101244903	17.13	13.74	11.47	9.76	11.57	10.42	6.42	8.48	7.61	3.18	4.74	2.82
101244904	483.83	460.61	484.36	235.17	186.1	183.36	679.89	974.87	581.21	151.58	171.19	154.22
101244906	150.82	67.71	51.97	110.72	140.97	86.4	44.25	52.35	44.71	114.94	185.81	110.15
101244907	31.88	2.59	2.41	17.73	10.99	7.79	1.96	1.25	2.42	27.49	39.35	54.31
101244908	3.65	2.56	1.97	2.65	3.78	2.98	1.65	1.93	1.6	4.49	2.24	4.66
101244909	22.08	18.47	14.52	15.38	20.06	14.15	18.34	21.91	19.61	121.04	16.68	142.99
101244912	5.72	5.35	3.73	2.71	6.8	3.25	2.31	3.51	1.96	7.89	5.65	5.47
101244915	2.55	0.71	0.58	3.83	2.32	3.17	0.35	0.32	0.4	3.16	4.05	0.15
101244916	20.36	14.96	14.58	4.17	5.6	4.08	11.66	16.04	9.44	2.36	7.52	2.31
101244918	3.33	2.49	3.02	7.11	11.96	8.62	3.53	5.3	2.98	17.03	16.31	17.79
101244919	5.6	8.72	6.7	2.34	2.83	3.11	8.93	12.74	9.07	2.77	1.68	5.56
101244921	0	0	0.16	0.08	0	0	3.37	24.6	3.67	0	0.25	0
101244923	14.64	7.14	6.71	37.34	63.87	35	6.96	9.09	7.37	42.05	49.21	33.68
101244925	1.02	0.32	0.3	1.99	1.08	0.35	0.14	0.13	0.19	0.44	0.97	0.27
101244926	12.12	6.26	3.83	2.99	1.37	3.22	6.42	10	7.93	0.56	0.79	1.01
101244929	1.2	0.04	0.04	0.04	0.4	0.09	0.13	0.04	0.04	0.04	2.36	0.4
101244939	20.52	4.52	4.33	12.31	9.95	13.85	7.01	3.48	8.36	23.22	21.95	9.88
101244943	83.8	129.96	133.54	65.08	80.73	71.14	153.06	152.96	145.98	61.8	66.12	58.7
101244950	7.25	1.88	2.57	1.15	0.77	0.75	4.17	4.91	3.17	0.98	1.75	1.9
101244953	0.41	1.66	0.96	2.21	0.81	2.02	0.99	2.62	1.16	5.7	1.9	9.17
101244955	0	4.01	3.53	0	0	0	0.79	0	2.21	0	0	0
101244957	269.38	256.51	248.12	131.22	100.36	110.7	353.62	533.15	287.58	35.29	105.86	49.4
101244959	5.52	5.81	7.17	17.61	18.66	21.09	2.65	3.07	3.41	12.11	11.49	16.73
101244960	3.93	3.86	3.36	1.97	2.29	1.7	4.87	6.31	5.36	1.38	2.56	1.1
101244961	4.89	0.77	1.14	4.74	4.4	3.27	0.82	0.24	0.63	33.06	25.79	12.16
101244962	6.14	0.78	0.53	0.05	0.05	0.04	0.13	0.35	0.48	0.09	0.14	0.04
101244964	23.01	21.89	18.03	7.45	7.51	8.28	29.66	40.48	30.19	7.04	10.82	5.19
101244966	33.75	48.86	39.94	9.26	4.79	7.05	71.4	95.08	66.13	2.24	7.99	6.18
101244967	0.53	0.77	0.39	0.29	0.54	0.35	1.4	0.84	1.92	0.04	0.27	0.07
101244969	13.43	73.49	65.96	1.5	2.51	2.27	85.44	124.08	93.92	1.48	2.73	0.97
101244970	7.37	7.21	7.07	6.37	6.27	5.55	3.77	4.61	4.46	1.77	2.58	1.84
101244972	27.39	20.28	15.33	14.79	14.75	17.12	19.73	24.62	20.03	7.1	8.52	7.24
101244975	0.73	86.05	24.84	0	0	0	0.08	0	0	0	0	0
101244976	0.06	0	0	1.55	1.31	5.88	0.12	0	0.06	0	28.45	1.12
101244981	1286.8	789.6	1155	1571.27	1867.35	1783.55	975.09	642.95	1128.76	2141.26	1302.43	2885
101244982	0.03	0.09	0.03	33.01	39.21	196.47	0	0	0.03	0.03	795.99	11.12
101244985	0.88	0.14	0.07	2.21	1.33	1.3	0.29	0.07	0.14	1.39	0.89	1.31
101244988	1.31	0.6	0.55	1.42	1.3	2.32	0.58	0.67	0.61	0.62	0.75	1.36
101244989	6.13	3.73	8.97	15.92	19.25	26.85	2.26	0.67	2.42	39.46	12.41	24.14
101244993	1.23	1.52	1.55	1.18	1.88	1.95	1.09	1.07	0.63	2.27	1.94	1.63
101244998	12.04	14.49	14.66	5.18	6.55	7.06	18.11	19.75	15.25	1.59	6.05	1.73
101245011	0.47	0.06	0.04	0.19	0.23	0.69	0.02	0.1	0.08	0.02	2.21	0.19
101245012	103.21	182.97	130.84	73.46	80.03	80.08	119.98	109.64	131.2	146.66	214.28	104.51
101245017	41.23	180.86	178.6	21.34	25.92	24.57	191.45	205.57	194.64	14.43	13.02	12.95
101245022	0.34	1.12	1.25	0	0	0	4.05	9.77	3.65	0	0	0
101245023	108.13	84.59	87.56	37.33	41.91	44.3	92.34	93.17	99.36	38.98	55.24	40.22
101245027	0.08	0.02	0.06	1.06	0.64	2.67	0.03	0.05	0.06	0.86	11.43	0.52
101245028	9.5	6.13	3.63	1.38	0.96	1.74	5.98	10.03	7.74	0.51	0.42	0.94
101245031	121.85	80.39	59.39	47.04	37.98	41.79	83.96	134.56	91.12	27.17	29.78	30.95
101245032	7.96	6.63	7.5	17.86	27.26	19.85	8.69	7.08	6.47	15.47	11.84	22.97
101245033	0.14	0.18	0.18	0.37	0.23	0.04	0.22	0.09	0.22	0.91	0.23	0.64
101245035	78.98	158.44	177.49	92.41	82.74	100.37	146.96	139.93	166.85	65.42	62.9	70.56
101245037	0.18	0.06	0.06	2.65	1.65	3.57	0.12	0	0	0.18	0.77	0.41
101245038	3.54	3.94	2.88	2.55	2.22	2.5	4.44	5.29	4.53	0.92	2.1	0.84
101245039	5.44	0.5	1.11	1.04	0.64	0.8	0.18	0.24	0.15	1.09	0.52	1.25
101245043	0.51	1.51	1.88	0	0	0	3.42	1.72	3.32	0.06	0	0
101245044	9.67	11.4	9.62	0.98	1	1.49	15.55	18.29	17.73	0.54	0.67	0.63
101245049	48.49	120.7	120.21	48.83	49.42	59.67	112.45	122.54	111.5	45.7	60.97	21.9
101245052	2.11	2.55	1.37	0.43	0.4	0.45	3.35	1.61	5.83	0.24	0.7	0.56
101245054	6	0	0	0	0.24	0.08	0	0	0	0	3.17	0
101245058	0.17	0.42	0.23	0	0	0.06	0.2	0.34	0.28	0	0.03	0.06
101245070	3.38	0.61	0.69	0.64	1.39	2.44	0.55	0.91	0.66	0.44	15.89	0.52
101245073	0.69	0.26	0.32	2.15	2.41	11.17	0.65	0.67	0.64	0.69	33.02	1.68
101245076	23.18	18.18	15.61	10.38	13.43	11.82	18.5	23.07	21.24	6.47	11.6	7.74
101245080	0.78	2.44	1.01	0.04	0	0	4.79	0	9.68	0	0	0
101245084	5.68	3.25	2.39	13.91	15.07	10.75	2.23	2.94	1.42	9.35	8.97	6.52
101245090	0.09	0.05	0.02	0	0	0.02	0	0	0.02	0	0.8	0.05
101245093	2.11	28.03	19.68	0.14	0.32	0.27	1.53	0.71	0.8	0.37	0.37	0.23
101245097	14.78	5.35	4.16	11.96	13.38	10.63	4.87	5.96	5.21	8.75	19.36	8.55
101245104	43.7	30.11	27.25	41.51	44.08	45.24	26.77	27.07	29.89	75.65	45.95	104.78
101245105	27.86	28.25	28.43	66.76	68.72	64.35	21.45	24.3	25.49	41.36	54.34	55.84
101245111	2.68	9.92	7.32	2.61	2.02	1.65	9.85	8.93	8.39	13.92	4.22	6.99
101245112	7.79	2.98	1.47	5.33	5.13	3.42	2.14	2.02	2.88	18.93	9.67	8.36
101245115	0.85	21.52	1.11	0.18	0.35	0.45	32.67	1.54	25.41	0.18	12.6	0.42
101245119	0.08	4	2.69	0	0	0	6.47	14.13	2.19	0	0	0
101245125	4.62	3.25	2.15	3.22	4.4	3.49	2.23	3.48	3.07	4.36	4.48	6.61
101245129	6.36	6.11	7.75	46.98	41.32	51.66	4.2	4.29	5.34	54.61	36.96	31.45
101245133	1.13	0.47	0.24	1.44	2.67	1.69	0.54	0.58	0.35	0.57	4.3	1.48
101245134	44.04	61.2	52.52	30.35	18.4	23.11	95.02	107.84	109.07	16.15	16.74	20.76
101245136	196.12	460.78	614.34	5.98	1.6	2.14	387.86	216.89	457.25	32.58	10.73	21.01
101245139	15.2	16.08	14.76	11.03	14.63	15.79	0	0.11	0.22	0	0.23	0.5
101245143	0.13	0.05	0.08	0.15	0.2	0.18	0.03	0.02	0.06	0.25	0.25	0.25
101245148	3.79	3.36	2.05	1.31	1.46	1.82	5.49	4.52	6.77	0.7	1.12	1.26
101245149	4.35	8.04	4.87	6.65	15.89	12.21	3.95	4.93	4.39	2.23	16.55	1.4
101245150	1.21	0.38	1.31	2.28	2.42	3.56	1.31	0.38	0.52	2.93	2.43	7.68
101245153	6.02	16.43	14.8	48.58	51.24	32.31	5.86	4.44	6.46	14.43	17.8	12.04
101245154	0	0	0	0.18	0.04	0.11	0	0	0	0	11.83	0.04
101245156	1.08	1.58	0.77	2.46	1.39	3.68	0.68	0.75	0.69	1.23	1.91	2.03
101245157	40.45	74.24	40.6	15.13	65.01	55.91	52.71	47.31	36.63	104.21	61.77	98.97
101245158	1.66	0.61	0.45	1.59	4.62	0.75	0	0	0	1.07	0.11	0.23
101245159	0.08	0	0	3.07	15.72	2.7	0	0.15	0	4.18	81.5	7.37
101245160	1.03	0.54	0.45	0.42	0.42	0.59	0.72	0.85	0.85	0.09	0.39	0.04
101245163	71.52	20.51	19.89	183.16	127.9	132.89	22.66	16.99	21.12	33.93	65.62	73.55
101245171	0.27	0.16	0.13	1.29	1.73	1.5	0.22	0.24	0.4	0.71	0.52	1.66
101245174	23.83	27.45	28.13	14.99	18.72	17.21	32.86	35.48	31.57	14.34	15	12.65
101245178	62.71	65.49	62.58	28.76	35.04	37.15	82.97	113.97	82.41	17.12	24.65	20.39
101245181	8.39	22.66	25.29	4.27	8.66	4.88	23.4	25.42	25.21	5	3.19	2.51
101245182	16.69	6.08	4.76	3.38	2.92	4.02	7.37	9.03	8.94	1.89	17.51	2.18
101245183	6.58	8.64	7.2	4.1	4.74	3.99	8.91	11.51	10.73	3.63	4.39	3.42
101245189	21.5	43.3	39.03	4.15	2.42	9.63	62.16	72.31	59.91	1.83	8.15	2.63
101245190	0.06	0	0.12	2.71	3.08	1.44	0.06	0	0	0.37	0.43	0.43
101245191	4.22	4.1	4.14	16.15	38.93	8.98	4.49	5.54	3.74	5.21	24.99	11.51
101245195	16.1	12.5	7.57	3.82	4.47	1.14	2.28	3.2	3.5	0.84	1.81	0.42
101245201	519.49	562.75	622.32	199.23	211.41	189.61	923.89	1197.82	722.25	253.58	231.36	248.56
101245202	2.06	0.42	0.35	0.63	0.56	0.17	0.17	0.5	0.33	6.31	0.14	1.59
101245204	0.21	0	0	0.65	0.5	3.82	0	0	0	0	17.43	0.27
101245205	517.46	513.46	498.22	289.49	208.64	215.76	627.8	878.7	573.98	154.35	203.18	159.88
101245207	5.97	0.99	1.02	38.5	9.73	31.6	0.42	0.74	0.92	9.12	5.83	26.1
101245215	0.97	1.82	1.82	0.04	0.12	0.2	1.15	1.63	1.68	0	0.08	0.12
101245216	1.25	0.25	0.21	0.05	0.37	0.1	0.36	1.06	0.46	0.05	0.16	0
101245219	60.41	40.02	43.59	102.61	115.41	139.4	48.29	33.63	51.32	102.04	77.59	122.04
101245220	49.48	16.47	16.48	67.77	48.88	60.01	14.7	16.94	20.18	84.17	49.02	110.71
101245221	9.09	26.77	22.39	5.17	5.04	10.32	19.89	26.65	24.93	3.54	3.77	2.25
101245224	329.8	233.7	242.26	334.12	351.07	335.95	252.74	279.29	223.69	496.06	440.57	471.44
101245233	0.22	0.41	0	3.96	3.88	2.11	0.14	0.41	0.7	4.63	0.22	0.78
101245237	11.81	0.41	0.97	3.19	4.67	3.84	0.42	0.4	0.87	2	9.96	2.39
101245240	4.23	2.72	3.25	13.23	8.74	7.77	4.07	3.36	6.2	14.87	5.64	22.99
101245242	1.08	0.9	0.41	1.12	2.24	3.27	0.92	0.55	0.82	2.13	5.17	1.05
101245247	0.99	0.61	0.49	6.26	6.68	1.25	0.42	0.14	0.07	4.02	3.56	2.25
101245249	265.64	293.67	327.44	130.59	141.02	122.4	464.42	586.83	380.74	167.78	187.45	164.09
101245251	2.45	1.28	0.89	3.87	2.34	2.85	1.73	2.17	2.2	0.3	2.68	0.82
101245253	5.92	13.15	15.06	4.7	5.94	4.48	8.19	5.78	11.11	18.99	14.53	7.88
101245255	0	0.12	0	1.19	0.75	0.12	0.06	0	0	0.43	0.13	0.25
101245256	8.56	4.22	4.65	7.85	10.16	9.59	3.06	2.89	3.87	8.49	10.95	7.02
101245262	1.27	0.9	0.64	2.7	1.74	1.77	0.32	0.8	0.74	1.69	1.2	2.53
101245263	8.73	10.22	11.66	4.31	3.75	5.82	6.42	3.77	6.74	1.89	3.75	2.21
101245264	484.15	510.36	489.82	240.1	184.93	196.77	713.93	916.64	638.37	148.74	194.26	173.98
101245265	18.57	16.62	13.32	4.4	1.08	5.07	24.74	29.74	22.48	0.62	0.26	1.12
101245268	2.08	4.88	5.91	2.03	2.38	1.65	6.76	6.54	4.83	0.4	1.1	0.29
101245269	0.78	0.18	0.15	0.48	0.45	0.84	0.16	0.11	0.37	0.09	0.13	0.06
101245270	33.54	47.69	47.46	14.62	17.21	17.84	55.35	68.86	53.55	12.8	11.54	9.66
101245271	0.29	0.68	0.33	0.41	0.1	0.21	2.43	1.01	5.59	0.02	1.34	0.04
101245274	17.93	8.42	8.14	34.73	36.78	37.04	6.17	4.87	8.83	40.35	25.1	38.23
101245278	4.1	2.45	1.68	23.14	23.36	21.04	1.28	1.48	1.51	15.12	17.34	15.09
101245279	31.13	14.21	16.33	42.05	32.24	42.49	21.17	15.14	19.37	38.19	39.53	30.46
101245281	13.46	2.82	3.42	4.82	10.63	6.15	2.42	1.28	2.7	7.45	6.89	8.61
101245282	1.82	0.64	1.49	18.39	26.53	33.12	0	0	0	2.05	0.06	1.93
101245283	72.39	55.46	45.26	34.62	39.52	32.71	65.31	103.26	62.72	22.78	27.75	22.99
101245287	0.69	0.19	0.39	5.56	8.96	5.26	0.58	0.28	0.19	23.46	4.19	17.98
101245289	3.85	2.56	1.34	6.13	6.05	7.99	1.28	1.08	1.63	9.09	6.15	5.24
101245290	34.39	31.47	28.71	51.54	70.75	63.45	35.6	35.83	34.6	85.39	79.94	61.89
101245292	9.42	6.01	4.97	6.62	8.4	9.51	4.75	4.43	5.51	8.38	9.79	8.33
101245293	54.84	74.7	85.19	29.59	25.72	33.04	53.98	50.77	60.92	17.61	30.34	14.49
101245295	0.17	0	0	0	0	0.06	0.06	0	0	0.17	10.9	0
101245296	36.08	26.83	25.92	67.51	80.05	66.49	27.69	22.35	32	72.42	50.31	76.2
101245297	5.15	6.71	8.24	13.42	10.52	15.57	9.64	5.74	7.73	21.51	7.88	24.45
101245298	8.57	0	0	0.65	0.16	0.24	0	0.08	0	0.32	0.98	0.48
101245299	177.73	203.8	304.1	521.37	465.66	706.8	242.98	125.82	256.43	236.63	251.27	487.71
101245301	19.58	23.63	26.99	126	79.15	88.46	87.9	97.93	63.92	34.77	166.1	74.34
101245302	76.38	54.1	58.16	130.96	124.87	148.51	49.61	33.4	62.34	139.56	90.97	169.59
101245304	1.97	1.43	0.92	0.71	0.75	0.81	1.9	1.25	2.44	0.23	0.97	0.54
101245308	16.64	15.87	15.28	36.3	51.2	50.91	15.58	9.82	13.92	35.13	39.66	35.67
101245313	0.1	0.1	0.1	1.12	1.43	0.9	0.1	0	0	1.52	2.35	7.46
101245316	2	9.98	7.73	23.64	9	6.4	18.28	23.89	19.83	9.58	4.89	8.23
101245320	299.43	279.18	253.93	164.3	160.18	141.91	341.66	506.83	330.8	169.63	157.75	169.04
101245322	1.96	0.5	0.77	0.16	0.46	0.61	0.51	0.28	0.6	0.1	0.16	0.13
101245324	2.52	2.03	1.39	2.35	4.7	3.97	0.88	1.15	1.47	5.14	2.94	4
101245327	45.26	37.98	28.63	27.6	22.17	23.15	35.76	56.09	42.62	15.6	22.08	14.33
101245329	0.3	0	0	1.27	0.9	0.37	0.07	0	0	3.77	0.15	1.85
101245331	2.3	3.06	2.53	0.76	0.85	0.53	3.33	4.01	3.72	0.65	0.75	1.07
101245334	8.21	21.93	17.27	8.96	5.68	8.01	14.58	18.88	10.36	4.8	3.59	3.05
101245336	4.87	4.9	4.45	14.49	22.45	17.39	3.96	4.16	3.2	16.83	9.17	21.15
101245338	144.12	102.72	120.91	9.88	9.58	10.2	69.36	35.22	92.75	9.3	19.17	7.32
101245339	113.59	104.84	136.65	240.11	245.05	276.62	159.89	95	121.23	94.64	137.26	249.41
101245342	18.71	19.14	14.59	10.06	12.26	10.51	19.75	31.01	19.38	9.83	9.72	7.85
101245343	51.5	45.23	39.18	25.18	19.02	22.46	54.32	80.75	51.09	14.4	19.68	14.85
101245346	2.14	2.57	2.31	5.19	5.86	6.87	5.61	9.73	5.3	2.92	3.5	4.96
101245347	10.69	3.56	2.41	0.16	0.27	0.7	1.82	0.21	3.17	0.22	0.55	0.82
101245350	9.84	8.26	6.78	3.52	2.57	3.8	8.32	9.03	9.7	1.9	3.24	2.6
101245353	0.5	0.12	0.16	1.81	1.48	2.02	0.02	0.03	0.07	1.17	0.58	0.99
101245356	465.31	455.37	473.97	183.43	118.84	147.96	808.1	1039.85	608.36	143.21	168.8	151.4
101245357	1.5	0	0.02	0.21	0.19	0.12	0.07	0.02	0	0.18	1.25	0.25
101245358	29.9	86.16	80.82	10.41	11.94	9.68	81.04	91.89	93.37	22.51	7.43	34.96
101245364	3.35	2.78	2.28	15.25	14.44	14.62	3.44	3.01	2.25	5.76	9.02	15.28
101245370	8.2	5.13	2.17	0	0	0	3.22	0	1.04	0	0	0
101245371	4.18	3.24	2.17	1.35	0.5	1.28	3.43	4.91	4.5	0.06	0.47	0.64
101245376	16.07	8.24	5.03	9.28	7.62	7.87	6.11	7.31	6.26	11.99	9.55	15.68
101245378	61.5	52.09	48.12	35.54	35.4	35.09	62.81	78.44	60.24	20.75	27.08	18.86
101245380	0.19	3.67	1.49	0.1	0	0	0.12	0.18	0.23	0.33	0.1	0.1
101245381	24.67	15.41	18	31.55	30.02	33.87	25.69	24.25	21.41	59.73	32.79	69.25
101245382	6.35	6.25	5.27	4.9	3.65	6.73	7.27	8.69	8.12	1.79	4.05	2.32
101245384	1.77	1.11	0.84	1.01	1.23	0.93	1.48	1.76	1.45	0.22	0.68	0.22
101245395	4.1	0.8	0.57	0	0.08	0.01	0.81	1.16	1	0.02	0.32	0.02
101245397	6.36	6.35	5.19	2.98	3.35	3.13	9.81	11.73	11.35	3.85	3.38	2.67
101245398	2.38	9.7	5.87	0.36	0.27	0.31	18.89	36.2	16.66	0.45	0.32	0.45
101245400	4.68	4.46	7.77	74.49	126.13	77.66	3.83	6.61	9.47	96.55	108.44	51.12
101245405	141.42	124.97	118.62	75.33	77.06	77.46	114.98	135.62	138.06	57.71	66.35	40.47
101245406	29.97	40.89	49.14	84.76	128.8	106.9	51.05	34.14	43.9	125.91	82.71	140.08
101245410	3.48	0.04	0.35	0.16	0.04	0.46	0	0.04	0	0.16	0.43	0.04
101245411	3.28	0.48	0.37	14.52	13.16	15.07	0.04	0	0.22	1.87	1.95	4.63
101245413	36.04	35.62	41	62.81	81.02	59.1	30.43	28.33	36.22	48.27	78.12	59.45
101245415	1.66	0.48	0.3	1.52	1.46	2.47	0.35	0.29	0.59	0.55	2.27	0.8
101245416	0.34	0.37	0.38	0.8	1.73	0.53	0.38	0.3	0.52	1.69	2.19	0.84
101245418	9.98	5.88	4.1	5.59	12.69	10.38	3.12	2.77	3.33	12.05	15.06	17.08
101245419	1.22	0.66	0.38	0.66	0.45	0.67	0.85	1.31	0.97	0.18	0.7	0.13
101245423	2.31	1.62	0.63	0.19	0.19	0.17	0.94	0.25	1.46	0.03	0.46	0.1
101245425	0.79	0.51	0.07	1.14	0.72	1.84	0.44	0.18	0.47	0.26	51.74	0.64
101245431	67.29	56.51	65.5	18.4	20.52	16.05	96.69	147.47	81.4	5.82	16.84	7.43
101245434	32.86	24.12	22.85	29.18	47.72	37.86	23.41	23.35	25.46	53.58	38.78	49.28
101245440	6.75	3.61	2.27	5.02	4.57	4.07	0.04	0.03	0.1	0.18	0.11	0.07
101245443	16.63	15.23	15.86	37.17	41.96	43.04	12.59	10.16	13.39	28.55	32.66	30.06
101245445	2.34	4.07	3.17	0.34	0.84	0.4	2.23	3.43	2.98	0.47	0.25	0.16
101245452	8.53	12.56	9.62	0.27	2.47	2.63	16.2	23.86	10.48	4.44	2.87	3.79
101245454	124.42	37.54	46.12	52.05	44.17	35.67	24.27	21.01	29.76	30.29	43.66	42.69
101245455	21.64	42.8	34.02	7.12	6.34	7.18	20.47	19.91	23.83	6.44	11.09	2.86
101245458	90.47	214.74	179.11	50.29	56.58	46.46	206.88	267.48	198.4	41.56	34.01	52.9
101245464	7.93	10.91	10.28	10.87	11.16	13.11	7.53	7.82	7.8	11.13	33.52	10.28
101245470	59.2	0.99	20.47	26.03	32.93	162.39	1.01	1.41	1.29	3.52	598.78	11.72
101245473	0.82	0.56	0.52	2.12	6.17	2.81	1.67	1.07	1.65	1.69	1.88	3.21
101245475	13.89	13.84	18.83	33.5	45.68	46.61	15.34	12	13.84	24.79	20.28	35.42
101245482	1.67	4.33	4.64	0.3	1.98	0.84	3.88	5.91	3.33	0.77	0.52	0.81
101245487	1.37	0.12	0.19	1.33	1.04	1.4	0.18	0.49	0.32	0.46	1.68	0.94
101245489	6.8	5.78	4.81	2.54	2.15	2.61	6.41	7.92	7.32	0.85	2.56	1.86
101245490	0.05	0.04	0.04	0.68	0.36	0.75	0	0	0	0	0	0.14
101245491	66.96	75.39	73.65	24.92	27.09	30.01	87.11	113.31	88.4	20.8	23.64	18.65
101245494	118.05	95.97	82.93	72.4	54.67	56.5	121.27	187.43	103.51	47.96	61.66	46.01
101245495	275.45	433.88	376.47	85.53	44.4	67.52	708.97	833.36	717.95	35.76	22.97	59.3
101245497	25.33	35.01	34.38	56.67	89.44	78.65	41.08	24.73	49.54	20.7	53.88	23.17
101245498	17.26	10.52	9.72	19.39	19.01	21.42	10.63	11.46	11.26	16.15	14.43	36.26
101245500	22.15	11.12	8.55	29.25	27.93	28.37	7.01	5.55	7.73	32.2	22.39	35.88
101245501	0.09	0.02	0	0.45	0.41	2.16	0.04	0	0.03	0.04	8.36	0.16
101245503	12.26	7.97	7.53	30.06	23.86	31.49	8.11	7.36	7.09	17.11	16.14	29.13
101245505	184.08	190.34	210.14	261.47	167.72	247.05	327.46	312.28	225.33	36.67	136.72	84.52
101245513	49.8	56.5	63.15	52.2	74.82	67.16	49.5	45.26	63.65	142.17	86.17	80.78
101245514	37.41	15.64	16.89	33.46	17.72	19.12	13.93	15.07	15.65	23.14	47.97	16.07
101245515	0.18	0.18	0.31	0.53	1.24	0.63	0.11	0.11	0.6	0.61	0.8	1.78
101245517	14.37	3.29	2.75	46.22	31.52	45.32	9.14	5.69	7.14	7.25	53.12	5.09
101245518	3.56	1.18	1.25	4.57	3.35	3.64	1.72	3.62	2.32	4.22	18.68	5.53
101245519	60.4	19.93	19.95	13.01	44.45	48.76	20.89	13.88	21.37	56.57	120.03	62.33
101245520	1.63	3.65	3.11	0.69	1.11	1.86	2.36	1.72	2.67	3.78	2.77	3.54
101245523	1.39	0.89	0.41	1.35	2.07	0.3	0.61	0.4	0.45	0.46	5.49	1.03
101245525	24.28	16.83	18.86	10.38	10.84	10.12	20.07	23.76	17.78	7.51	9.33	6.73
101245527	1.07	0.64	0.36	0.32	0.45	0.48	0.72	0.52	0.31	0.06	0.21	0.02
101245530	312.3	427.6	575.67	1151.04	963.89	1085.25	458.53	403.25	464.58	501.29	879.52	269.2
101245534	136.72	281.44	289.52	102	113.82	115.5	340.34	343.5	374.62	88.83	81.32	87.24
101245536	2.78	1.54	1.79	8.22	6.08	9.25	2.14	2.13	2.59	12.2	8.3	15.63
101245539	1.17	0.88	0.65	3.35	1.51	4.42	0.33	0.24	1.05	6.06	1.68	12.43
101245541	19.06	24.77	35.61	8.33	15.24	7.92	30.99	30.58	30.25	5.58	5.49	8.48
101245546	0.49	0.26	0.14	0.12	0.06	0	0.52	2.21	1.03	0.03	0.16	0.06
101245554	180.67	227.6	207.16	237.07	306.22	151.07	169.12	120.86	164.84	350.89	251.7	298.61
101245555	2.11	3.48	3.8	0.57	0.7	1.31	4.18	4.56	5.79	0.21	1.47	0.69
101245557	120.35	134.55	171.04	0.43	0.43	0.47	151.04	0.67	182.79	0.48	0.32	0.21
101245558	79.72	56.21	52.84	149.77	89.06	140.2	61.27	48.94	55.71	35.76	60.27	70.94
101245562	17.48	13.5	11.25	7.42	8.65	7.32	10.84	14.22	11.21	4.63	4.5	5.52
101245564	79.95	76.25	67.55	115.26	166.13	132.57	74.73	82.33	70.48	147.88	143.37	154.04
101245569	1.36	0.76	1.33	0.56	0.56	0.16	3.44	4.1	3.02	0.16	0.56	0
101245576	0.59	0.75	0.7	0.51	0.49	0.68	1.19	1.31	1.03	0.1	0.55	0.08
101245582	28.33	19.32	16.61	26.74	22.26	26.39	7.39	7.7	8.63	22.09	18.1	25.03
101245588	6.8	7.98	9.11	9.65	12.8	14.38	9.4	10.45	10.39	17.26	12.36	29.14
101245591	45.61	24.26	17.24	15.71	12.85	16.6	25.71	42.82	26.58	9.21	11.92	9.4
101245596	5.77	3.53	2.29	7.9	7	7.24	2.25	2.65	2.66	3.12	3.74	3.56
101245600	3.19	1.48	0.96	3.23	4.39	4.76	0.55	0.56	0.83	5.39	2.86	2.88
101245602	5.72	15.14	12.04	3.59	2.05	1.67	26.56	68.12	27.17	0.85	3.34	1.1
101245606	15.26	13.3	9.34	18.1	19	20.4	11	11.81	10.83	27.2	13.95	36.62
101245610	0.73	1.97	2.16	0.37	1.15	0.63	2.29	2.42	1.82	0.91	1.33	0.59
101245612	3.76	3.19	2.08	3.64	3.53	4.1	2.07	2.91	2.52	9.09	3.55	7.68
101245615	6.47	5.13	4.13	2.27	3.02	1.93	4.94	6.9	6.01	3.61	3.57	2.22
101245616	41.25	1.47	2.77	20.27	25.82	8.38	1.62	0.88	4.11	9.39	171.95	11.48
101245617	33.73	8.26	5.47	0	0	0	5.78	2.93	6.97	0.15	0.23	0.12
101245620	0	0	0	0	0	0.07	0	0	0	0	20.23	0
101245626	49.3	142.04	254.5	52.19	56.11	54.41	187.25	128.66	154.02	207.04	38.09	189.59
101245628	7.36	9.5	10.43	4.9	4.41	6.22	10.47	10.79	10.95	3.18	3.47	2.31
101245632	6.9	4.24	7.48	6.26	9.48	8.97	2.7	4.61	4.33	7.6	39.4	4.73
101245634	3.35	3.34	1.75	9.66	11.38	8.98	3.03	1.14	4.38	16.69	8.57	17.28
101245637	5.14	8.63	7.45	4.95	4.71	5.46	7.08	7.85	6.87	2.78	3.3	2.71
101245639	17.75	19.79	16.13	10.27	11.49	12.61	20.8	22.61	19.6	7.09	8.68	7.05
101245640	14.96	3.65	1.99	21.02	15.2	15.07	1.31	1.51	2.37	11.84	8.21	9.55
101245642	2.06	4.64	4.36	2.99	4.37	4.97	3.58	6.53	4.1	1.85	1.39	1.86
101245645	12.9	3.2	3.04	9.74	7.84	6.78	1.8	2	3.55	9.23	6.99	4.83
101245647	12.99	8.32	7.54	22.92	27.96	19.68	6.93	7.5	7.75	53.24	63.27	55.85
101245652	132.82	100.49	86.41	60.34	54.26	56.14	127.26	223.34	107.87	29.9	44.99	31.7
101245653	27.27	33.3	30.11	12.42	14.61	15.91	44.19	37.8	55.46	11.11	14.02	11.22
101245656	2.34	0.97	0.75	0.4	0.31	0.32	0.55	0.93	0.92	0.21	0.21	0.17
101245659	2.12	6.22	4.92	0.26	0.58	0.32	7.57	13.29	6.11	0.06	0.19	0.7
101245664	30.56	12.01	17.36	7.03	19.96	7.5	27.25	17.44	41.07	59.35	22.58	21.81
101245672	12.18	5.3	4.47	9.9	13.21	14.19	4.78	4.1	5.21	11.33	10.34	15.64
101245673	49.7	71.4	81.13	33.87	39.72	50.29	92.09	107.31	87.41	16.83	13.05	34.48
101245674	0	0	0	0.83	0.59	0	0	0	0	0	0.08	0.08
101245675	7.89	10.47	7.81	12.01	17.48	15.08	6.74	5.3	6.73	13.94	8.22	14.15
101245679	8.63	23.99	21.99	4.14	7.88	9.33	33.36	52.81	36.87	4.72	4.05	3.55
101245683	50.3	31.34	30.6	96.32	58.92	93.06	43.6	31.66	31.84	55.12	35.17	141.69
101245684	4.3	7	6.37	39.49	41.92	19.63	4.38	7.38	3.28	37.92	31.39	86.27
101245686	186.1	127.12	129.46	99.52	72.66	71.97	175.14	239.12	147.62	66.18	62.15	82.39
101245689	0.33	0	0.04	0.78	0.41	0.72	0.07	0.04	0.11	0.37	0.07	1.95
101245692	14.7	10.23	6.51	2.39	2.03	3.61	11.33	13.23	12.32	1.13	2.09	1.43
101245693	8.75	26.92	29.4	5.93	7.55	6.23	24.77	27	30.4	16.17	5.98	8.55
101245695	3	0.58	0.36	1.42	1.05	3.39	0.49	0.45	0.58	0.54	8.88	1.74
101245696	2.18	2.1	2.09	0.51	0.9	0.5	1.76	1.85	2.34	2.29	5.73	2.99
101245697	1.1	0	0.08	1.56	1.55	1.04	0.12	0.04	0.16	2.23	0.57	4.51
101245698	41.44	41.74	43.93	111.27	86.57	116.37	33.71	27.49	32.26	57.19	46.49	69.84
101245702	14.45	9.81	9.62	3.46	3.74	4.55	11.64	12.47	12.22	2.8	21.69	2.14
101245704	14.92	4.99	2	0.57	1.62	0.64	0.78	0.44	1.05	1.58	1.73	1.27
101245708	15.57	29.99	23.56	36.93	25.06	36.09	16.07	20.29	19.96	43.27	25.03	67.68
101245709	2.41	7.2	7.5	7.38	5.3	4.27	7.47	9.94	9.21	2.07	1.14	2.6
101245711	14.79	2.13	2.28	0.69	2.85	0.42	0.59	0.9	0.84	1.88	0.61	0.94
101245712	0.68	0.53	0.29	0	0	0	0.34	0.28	0.28	0	0	0
101245713	13.28	23.74	24.97	6.67	8.16	8.42	26.39	23.63	28.92	9.02	6.32	8.98
101245714	10.71	6.5	6.89	18	15.54	16.82	9.36	7.66	7.16	12.95	14.32	11.58
101245719	0.2	0.09	0.04	0.17	1.24	0.16	0.03	0.03	0.03	0.14	0.13	0.11
101245720	15.36	15.07	12.37	21.35	35.54	22.72	11.41	12.83	8.03	40.99	32.37	22.83
101245721	8.3	5.91	4.45	3.97	3.54	4.31	6.41	7.97	7.62	2.07	2.45	2.38
101245724	17.02	105.61	126.25	2.66	12.03	8.53	111.98	132.64	121.77	4.91	4.42	3.72
101245732	67.55	34.89	25.09	90.44	90.47	77.8	32.3	37.15	33	100.86	73.76	110.94
101245735	9.59	3.31	3.47	8.38	9.67	8.47	3.09	4.85	3.55	22.41	17.13	18.91
101245736	15.06	4.88	6.12	1.91	2.66	2.28	5.05	4.83	3.94	1.35	0.87	1.89
101245737	59.23	53.22	57.77	26.73	24.74	23.87	71.74	96.65	67.07	17.39	23.18	18.11
101245748	2.7	2.58	2.97	0.52	0.97	0.5	3.72	5.97	4.24	0.32	0.71	0.77
101245756	23.64	25.9	25.72	10.37	13.47	12.73	31.71	39.01	33.23	9.02	11.69	7.43
101245759	0.13	0.04	0.11	0	0	0	0.06	0.23	0.04	0	0	0
101245763	50.24	41.45	34.48	94.93	71.12	80.94	39.39	44.2	36.04	79.1	55.2	117.83
101245764	37.93	39.69	35.19	32.53	45.62	44.1	4.19	7	4.07	4.94	4.3	3.65
101245767	4.9	7.97	5.75	2.32	2.28	3.66	7.37	8.93	10.45	1.34	2.37	1.58
101245768	5.98	6.95	4.28	2.11	2.68	1.67	4.28	7.85	6.36	0.32	0.89	1.12
101245771	2.15	2.28	2.54	2.47	2.1	2.3	3.41	3.83	2.76	0.23	1.34	0.34
101245772	12.38	8.85	6.57	4.57	4.47	4.41	7.82	13.67	7.83	2.55	3.7	2.84
101245776	28.4	40.06	47.03	16.9	23.78	20.23	48.31	51.09	49.21	19.54	19.68	16.44
101245781	23.85	12.03	11.27	6.56	3.38	0.73	9.15	5.23	17.63	0.65	1.32	0.93
101245784	0.41	0.17	0.17	1.18	1.3	0.58	0.17	0.62	0.86	2.87	1.12	2.76
101245785	42.45	42.03	45.62	87.16	79.09	99.61	49	38.11	39.55	35.29	55.97	55.52
101245788	51.79	31.73	29.93	12.78	17.87	15.38	36.6	45.46	39.43	14.53	14.46	11.93
101245792	0	0	0	0.71	0.61	1.53	0	0	0	0	8.4	0.26
101245793	143.05	274.17	268.05	46.05	24.8	40.26	458.3	641.55	361.67	7.49	10.31	18.01
101245795	1.48	0.28	0.27	3.64	3.48	5.17	0.84	1.25	0.69	5.11	3.2	9.79
101245797	30.89	29.45	27.13	29.76	36.06	35.63	23.59	21.72	27.87	60.48	42.22	31.73
101245801	23.08	17.06	22.52	6.88	7.49	6.99	40.87	42.8	27.35	2.32	7.51	4.04
101245802	9.34	10.27	10.82	8.16	7.93	9.78	11.73	15.86	13.72	4.78	5.68	5.26
101245803	26.07	21.08	24.91	46.93	67.97	62.3	20.03	16.73	20.37	78.5	56.48	78.48
101245805	42.55	134.69	162.05	33.05	23.38	31.14	107.3	97.71	89.45	46.72	26.48	27.06
101245814	35.55	23.21	20.22	80.73	41.43	53.89	24.33	18.68	26.7	20.23	37.1	24.04
101245815	17.49	66.2	60.65	16.05	12.39	14.2	33.9	26.85	47.29	31.71	18.76	25.47
101245818	0.1	0.18	0	0.19	0.24	0.47	0.28	0.32	0.37	2.91	0.38	4.35
101245820	2.34	1.07	0.97	6.76	7.82	7.6	1.55	0.95	1.97	4.51	3.4	8.25
101245822	4.44	3.37	2.14	1.61	1.12	1.99	2.7	2.28	4.21	4.69	3.01	2.38
101245831	2.69	1.6	0.98	0.68	0.35	0.81	1.67	2.6	2.04	0.16	0.35	0.35
101245833	1.67	1.66	2.23	2.41	5.43	5.37	1.51	1.21	1.68	2.66	3.22	5.58
101245840	52.64	14.98	14.46	29.18	46.88	32.17	13.47	12.37	13.26	28.36	59.93	17.87
101245843	4.98	3.13	2.46	4.15	6.59	5.76	2.08	2.53	2.78	4.61	7.51	3.26
101245844	4.46	1.93	1.33	6.89	9.88	10.5	1.6	1.29	1.45	6.52	4.07	7.06
101245847	23.29	27.69	26.2	13.4	16.06	16.69	29.66	34.71	29.92	12.29	14.9	12.46
101245849	0.39	0.19	0.16	1.11	0.87	0.62	0	0.04	0.11	1.53	1.07	1.93
101245851	34.04	49.98	35.9	23.58	25.55	24.97	65.43	39.15	103.02	48.75	97.5	45.59
101245856	3.73	2.75	2.9	6.76	10.7	9.07	4.28	4.92	4.38	5.04	33.96	5.88
101245858	5.68	3.96	3.01	7.7	8.73	9.3	2.8	2.96	2.7	2.91	6.98	3.36
101245860	12.67	2.79	1.5	13.29	8.32	8.12	2.7	2.74	2.15	2.75	5.3	7.61
101245867	2.36	0.04	0	0	0	0	0	0.07	0	0	0.04	0
101245869	42.51	40.12	45.9	52.78	70.06	58.73	44.79	36.46	35.65	79.87	49.36	78.01
101245871	36.36	38.88	40.01	32.18	27.85	40.62	46.7	46.23	35.88	11.85	22.46	15.59
101245873	148.43	133.66	114.1	67.9	59.72	65.82	228.92	293.98	216.26	73.69	84.74	75.49
101245874	7.1	3.82	7.28	44.17	20.31	17.78	3.6	3.49	5.78	121.19	8.53	117.88
101245882	7.37	3.44	3.06	10.29	7.36	10.38	3.8	3.07	3.59	3.57	9.14	6.07
101245884	15.81	13.64	10.1	6.2	6.76	6.37	12.92	19.83	14.21	5.05	6.38	3.73
101245886	52.16	21.29	19.15	29.1	18.34	15.2	17.53	20.39	18.06	37.86	31.65	47.95
101245889	125.37	147.75	138.22	79.87	87.35	86.82	171.69	222.76	166.72	86.73	86.63	67.22
101245893	154.25	160.78	158.37	89.88	87.35	91.74	215.09	288.07	187.45	63.77	85.41	62.23
101245895	2.62	2.89	3.75	8.75	11.04	6.51	4.08	5.83	2.86	6	3.1	12.95
101245896	7.95	1.51	1.36	38.17	15.64	14.2	1.74	0.67	1.91	9.24	7.67	12.88
101245898	4.93	0.06	0.06	0.07	0.1	0.06	0.06	0.03	0.06	0.03	0.1	0
101245905	12.99	1.56	2.43	3.21	2.81	1.76	4.31	9.26	2.16	4.98	5.42	6.01
101245913	150.95	117.61	118.22	134.11	115.15	136.01	130.18	164.2	142.21	244.12	212.1	245.3
101245916	9.17	4.09	4.13	0	0	0	4.49	7.81	7.51	0	0.15	0.07
101245919	5993.48	0.26	0.27	0.34	0.62	0.67	0.34	0.33	0.2	0.41	4.05	0.41
101245920	10.48	4.09	2.52	4.82	3.89	4.13	3.5	7.36	3.99	1.62	2.57	1.53
101245923	0.9	0	0	2.84	3.24	16.27	0	0	0.03	0	36.86	0.9
101245933	135.36	626.15	662.42	71.44	122.1	113.16	740.8	768.06	700.39	70.52	65.93	61.44
101245934	13.87	0.85	1.95	3.16	6.51	5.18	2.31	0.3	2.59	17.6	3.42	24.99
101245937	9.17	1.35	1.54	4.62	5.04	4.54	0.97	1.35	1.46	8.09	2.73	6.86
101245941	0.51	0.11	0.11	2.42	2.31	11.49	0.09	0.23	0.16	0.19	22.57	1.23
101245944	4.77	2.2	1.35	5.04	5.5	5.05	1.9	2.6	1.97	7.2	4.64	9.93
101245945	73.54	12.08	20.78	29.43	32.2	31.3	9.57	11.48	13.88	29.44	35.76	25.14
101245946	10.09	8.59	8.84	3.91	4.25	5.36	7.94	9.54	9.91	2.21	4.36	1.74
101245949	7.53	6.84	3.09	5.59	5.1	3.76	3.73	3.52	4	7.99	7.59	6.48
101245956	99.54	139.03	148	47.14	39.44	37.13	215.26	269.63	190.84	85.53	49.94	57.01
101245961	35.17	41.38	40.93	25.18	28.14	26.23	42.37	47.9	48.43	20.16	22.43	16.71
101245962	5.95	2.6	2.66	1.24	0.95	1.39	5.03	8.53	3.77	8.5	2.78	6.22
101245965	0.46	0.16	0.17	2.65	1.95	2.47	0.17	0.16	0.06	0	1.67	0
101245971	1.87	7.62	6.27	0.78	0.43	0.8	11.81	19.33	11.43	0.13	0.11	0.21
101245980	61.8	40.83	39.03	32.92	16.24	27.5	49.87	60.23	41.66	7.35	16.38	10.74
101245991	1.55	0.22	0.56	1.07	0.87	1.19	0.56	0.29	0.44	0.9	0.61	2.15
101245992	1.88	1.97	1.74	0.54	1.51	1.05	4.48	6.4	5.16	13.05	5.61	5.46
101245993	8.93	14.29	23.81	50.91	30.08	84.6	4.51	1.8	23.45	17.91	7.17	21.57
101245995	14.68	23.54	19.66	8.55	16.46	26.29	23.17	14.95	26.81	6.83	5.11	9.41
101245996	27.83	22.4	19.54	27.9	23.84	33.28	27.26	28.62	26.35	5.91	15.24	8.95
101245999	9.45	4.76	5.55	14.07	13.52	7.63	6.35	7.54	5.72	30	14.86	6.87
101246000	66.17	79.94	76.31	29.69	22.72	27.22	120.6	175.11	92.63	6.61	16.07	8.14
101246001	0.79	3.24	2.65	0.73	0.88	0.89	3.16	4.37	3.35	1.36	2.13	0.55
101246005	3.9	3.17	2.74	3.54	3.3	9.39	2.52	3.22	2.59	2.6	20.77	2.71
101246007	74.77	107.37	122.22	42.2	53.61	50.98	104.79	106.01	117.93	61.68	58.24	46.01
101246010	8.11	5.82	5.48	12.17	12.72	15.9	5.35	5	6.57	4.91	6.93	6.62
101246025	6.84	5.63	3.98	8.16	11	8.91	4.5	5.97	5.15	12.14	11.59	8.62
101246027	5.9	1.82	1.26	6.7	9.24	6.73	1.17	1.5	1.94	5.4	4.93	5.24
101246028	42.25	22.45	21.07	77.89	71.75	101.27	18.57	13.4	22.63	61.94	37.73	88.14
101246029	0.08	0.16	0.16	1.39	2.22	0.96	0.08	0.39	0.16	0.81	0.58	1.14
101246031	21.12	20.7	19.85	18.48	15.76	9.28	23.85	26.67	21.26	23.21	35.88	24.27
101246032	9.46	7.92	6.22	9.87	12.89	12	6.23	3.69	7.27	17.89	7.83	18.55
101246036	1.49	0.74	0.23	29.73	9.49	21.57	0.76	0.91	0.81	1.54	8.12	16.4
101246041	0.71	0.24	0.19	0.94	0.61	1.56	0.05	0.11	0.4	0.76	0.5	1.18
101246042	2.71	0.72	0.58	4.63	2.05	2.93	0.69	0.92	0.75	1.82	1.61	4.13
101246044	7	3.87	3.11	3.13	2.89	2.36	3.28	5.17	3.3	0.89	2.14	1.52
101246050	40.19	20.93	18.41	21.26	40.26	27.69	14.14	10.42	17.46	32.24	32.16	22.5
101246051	22.3	25.57	20.33	5.24	3.99	6.27	31.33	37.21	29.68	2.63	2.87	2.53
101246052	3.46	0.09	0.23	0	0	0	0.18	0	0.09	0	0.09	0
101246054	0	0	0	0.48	0.33	0.8	0	0	0	0	23.93	0.33
101246056	5.72	12.48	12.13	4.3	5.66	5.29	12.2	17.13	16.75	6.25	3.35	4.71
101246065	0.04	0	0	0.13	0.08	0.57	0	0	0	0.04	3.67	0.33
101246067	25.11	6.52	5.93	7.15	6.92	5.4	9.95	13.15	9.56	11.02	15.66	10.47
101246068	583.39	620.72	677.27	324.04	291.45	285.76	995.57	1327.33	854.22	194.62	270	225.35
101246069	5.49	2.07	1.71	2.08	3.65	2.1	2.05	1.93	1.77	3.99	3.48	3.89
101246074	13.8	8.77	7.42	19.45	22.77	20.68	8.28	7.92	7.77	23.8	18.15	22.55
101246079	1.73	0.95	0.62	6.38	20.01	19.17	0.33	0.14	0.23	8.56	0.86	2.64
101246083	2.12	3.1	2.66	7.04	8.41	6.03	4.85	6.72	4.42	4.01	7.73	9.99
101246085	34.08	1.97	2.8	68.03	55.19	111.02	9.21	8.27	19.24	270.12	98.37	307.63
101246092	24.6	75.01	61.16	13.13	15.98	8.72	47.51	48.39	46.15	74.19	11.25	25.36
101246093	1127.47	928.43	871.25	548.94	406.23	382.21	1039.62	986.08	1351.22	409.34	420.64	201.19
101246095	71.55	39.19	34.68	59.3	82.21	72.15	29.55	32.45	37.42	76.18	61.2	50.12
101246098	3.88	1.42	0.88	0.45	1.55	0.1	13.43	0.66	17.28	0.89	0.52	0.34
101246102	0.8	0.09	0	29.8	27.79	25.15	0	0.06	0.09	47.4	42.17	63.18
101246103	5.02	8.28	6.79	1.06	1.06	1.12	8.57	4.03	7.55	1.27	1.11	1.36
101246105	0.97	0.2	0.05	0.87	1.38	0.75	0.05	0.15	0.15	0.15	0.05	0.2
101246106	0.2	0.39	0.3	0	0.03	0.03	1.03	0.75	0.29	2.28	0.24	7.61
101246110	1.27	0.49	0.43	1.73	1.62	1.29	0.57	1.18	1.17	1.26	1.26	1.48
101246111	15.26	11.67	10.42	5.99	6.34	8.25	13.32	15.41	14.97	3.75	5.73	3.43
101246113	3.93	3.47	2.34	2.42	2.7	2.66	3.2	3.83	3.06	1.42	1.54	1.18
101246116	7.06	4.71	4.68	2.43	2.42	3.24	6.21	8.67	6.51	1.85	2.91	1.15
101246118	1.76	1.28	0.9	0	0	0	0.16	0	0	0	0	0
101246119	0.42	0	0.14	0.05	0.19	0	0.09	0.54	0.63	0	0	0.09
101246120	27.1	43.15	40.64	15.74	19.39	16.7	34.15	38.55	40.61	15.63	12.91	13.44
101246121	76.1	98.62	97.68	45.35	42.64	47.64	133.96	157.99	133.08	25.74	30.35	27.68
101246122	0	0	0	0	0	0	0	0	0	0.56	0.08	0.16
101246124	9.6	5.14	4.26	5.99	6.26	11.99	4.62	3.83	4.32	5.04	21.68	4.33
101246125	10.37	56.56	62.78	8.72	18.25	15.43	58.53	54.35	50.54	5.85	7.01	4.73
101246126	6.46	4.1	3.97	10.33	13.76	9.66	4.74	5.11	4.89	14.58	14.98	13.23
101246129	0.76	0.04	0.28	2.83	3.06	1.96	0.09	0.04	0.46	3.35	1.09	4.08
101246134	0.14	1.45	0.74	0	0.07	0	2.7	6.77	2.6	0	0	0.07
101246135	103.55	163.22	96.82	41.08	59.73	19.42	72.03	83.3	58.95	59.02	62.29	39.04
101246139	22.94	18.14	14.58	16.51	26.08	25.81	14.86	16.07	20.08	57.48	23.71	53.94
101246140	116.89	85.36	84.65	74.51	72.29	69.71	96.31	116.34	99.92	167.03	291.83	118.3
101246143	0.33	0	2.66	1.77	0.36	0.13	0.13	0	0.66	0	0	0.03
101246145	22.54	14.17	15.65	26.84	26.8	35.26	14.71	10.58	16.29	8.41	14.09	13.93
101246148	55.69	90.91	96.61	33.46	37.65	38.01	88.96	91.15	121.04	50.11	29.8	36.89
101246149	2.34	3.04	1.47	5.25	10.53	12.7	2.84	3.82	1.37	6.43	3.3	4.64
101246151	18.8	35.93	35.43	10.92	14.78	10.14	35.96	35.8	40.9	16.43	8.85	11.51
101246156	9.04	7.74	6.69	3.51	3.15	1.99	8.85	13.65	9.68	2.02	3.06	1.28
101246163	2.27	14.81	2.5	1.61	1.52	1.53	3.11	3.82	4.11	1.64	0.67	1.25
101246166	12.55	21.1	22.07	9.41	11.27	11.95	31.8	14.13	48.42	9.06	9.26	7.6
101246167	17.9	21.54	20.55	23.43	29.78	30.51	13.2	13.53	14.19	42.97	34.54	37.02
101246171	47.61	32.66	33.57	68.04	60.23	74.08	65.59	66.27	65.06	136.47	123.62	163.43
101246177	6.92	5.51	3.35	9.04	18.95	13.35	4.76	4.35	6.3	16.26	9.34	19.77
101246179	16.85	5.05	5.2	3.03	19.86	3.44	5.09	5.21	3.4	12.23	15.52	6.66
101246181	2.06	0.78	0.31	0.57	1.28	0.74	0	0.02	0.05	0.15	0.04	0.08
101246182	2.61	7.77	9.4	0.07	0.58	0.93	14.58	26.72	12.25	0.36	0.29	0.29
101246183	11.06	6.68	4.31	2.67	2.99	2.73	4.76	9.46	5.33	1.79	1.66	1.51
101246185	0	7.61	7.74	0.86	0.33	1.43	3.05	7.29	3.09	0.13	0.8	0.53
101246187	6.11	3.48	2.87	5.93	5.62	7.33	3.28	3.51	3.54	4.94	7	6.52
101246188	1.86	2.07	1.88	4.72	4.41	2.85	1.15	1.54	1.2	8.37	3.61	4.19
101246190	1.07	1.07	1.15	0.05	0	0.05	1.43	1.26	3.35	0.05	0.2	0.15
101246195	0.3	0	0	1.22	0.61	0	0.1	0	0	0.4	19	0.2
101246197	6.47	5.32	3.81	6.83	8.07	7.42	4.21	5.37	4.33	9.28	5.35	9.76
101246198	13.42	20.4	16.28	21.86	26	29.75	13.12	9.79	9.73	26.99	17	31.09
101246199	31.68	27.2	25.57	45.62	61.66	62.42	21.99	20.55	22.64	36.99	46.04	32.29
101246203	7.51	4.43	3.34	5.24	4.42	6.34	2.89	4.06	3.38	6.18	6.79	5.35
101246204	2.63	1.36	0.94	0.51	0.3	0.35	1.54	1.7	1.27	1.31	0.71	0.86
101246206	5.23	2.07	2.29	1.16	1.49	0.86	1.84	2.12	2.74	1.01	1.45	0.95
101246207	101.26	204	208.58	108.36	140.23	126.45	205.55	233.06	245.58	48.66	100.63	37.23
101246212	2.77	0.35	0.28	2.94	1.85	1.1	0.88	0.5	0.69	2.73	1.72	5.69
101246213	2.97	1.77	1.13	1.09	0.74	0.75	1.66	2.46	1.48	0.36	0.7	0.52
101246218	13.68	6.65	7.38	20.01	13.64	17.15	8.99	9.06	8.35	13.74	19.14	21.94
101246219	0	0	0	0.13	0.02	0.31	0	0	0	0	4.92	0.02
101246223	0.07	2.27	1.51	0.21	0.1	0.13	0.88	1.24	1.49	0.2	0.14	0.07
101246231	0.98	0.03	0	0.04	0	0.03	1.89	2.44	0.54	4.16	2.15	2.19
101246236	17.58	24.79	25.29	13.68	19.84	20.06	31.59	32.97	30.65	13.63	12.83	11.74
101246237	3.38	8.34	6.48	0	0	0	0.46	0	0.23	0	0	0
101246239	20.26	76.07	67.61	0.1	0.57	0.28	69.52	79.24	79.36	0.05	0.1	0.14
101246241	38.22	9.38	33.05	7.7	8.23	4.47	0.97	1	1.75	7.24	11.97	8.08
101246245	0.99	0.44	0.58	7.1	6.26	4.36	0.45	0.6	1.9	1.72	0.84	4.85
101246247	1.34	2.48	1.56	0.04	0.67	0.31	2.6	5.52	2.26	1.05	0.57	0.35
101246249	29.16	16.03	14.58	76.8	73.22	102.29	8	7.24	12.29	92.8	75.41	94.58
101246250	1.33	0.96	0.57	2.67	2.29	2.03	1	0.52	0.64	6.83	2.23	4.27
101246253	5.87	2.75	1.9	0.97	1.4	0.95	3.03	6.35	2.7	0.71	0.32	0.68
101246254	50.14	42.19	38.34	22.94	25.56	21.01	48.37	79.4	42.62	20.58	23.05	22.87
101246256	373.95	307.7	276.22	190.36	142.48	141.68	427.23	645.22	394.38	157.23	135.76	146.3
101246257	58.35	27.66	51.73	29.93	48.92	45.45	22.15	16.79	26.86	33.21	34.02	49.22
101246258	0.03	0.12	0.03	0.16	0.19	0.78	0.03	0	0	0	17.99	0.06
101246259	9.83	2.61	1.16	0.74	1.69	0.58	1.6	3.42	2.3	2.31	2.03	1.43
101246261	22.73	11.45	9.94	14.89	18.74	15.62	9.77	9.68	10.83	16.34	21.49	16.4
101246262	4.21	3.21	6.42	20.04	16.43	13.23	7.14	10.02	6	30.31	19.75	52.21
101246264	0.11	0.07	0.07	0.99	0.49	1.41	0.07	0	0	0.66	0.11	1.12
101246265	12.29	26.95	22.47	6.11	3.29	8	35.03	41.32	36.9	1.28	1.67	3.2
101246270	10.57	15.57	13.87	9.89	20.77	13.79	9.11	5.12	6.82	12.7	22.71	10.53
101246272	4.28	4.38	3.22	5.9	8.56	7.1	4.54	4.05	4.16	11.59	6.33	11.17
101246275	5.21	1.4	0.99	89.25	150.57	91.8	1.25	0.17	1.96	122.22	141.95	83.83
101246281	1.65	4.7	5.19	1.21	1.54	1.23	4.38	2.38	4.75	8.09	2.02	3.1
101246284	7.6	12.27	11.04	3.76	1.52	2.37	11.28	15.53	12.16	1.95	3.15	2.31
101246285	2.31	0.46	0.29	1.2	1.16	4.26	0.35	0.17	0.63	0.16	16.85	0.28
101246288	0.62	3.19	2.17	0.13	0.13	0.13	2.93	4.34	1.93	0.1	0.47	0.39
101246295	6.85	7.23	10.76	29.04	34.16	10.69	8.02	3.34	7.9	16.67	6.39	6.77
101246299	0.21	0.57	0.32	6.66	7.47	13.86	0.34	0.71	0.55	0.48	85.61	1
101246300	10.04	10.53	7.59	2.95	2.84	3.73	11.87	16.66	12.04	1.58	2.64	2.09
101246301	1.21	0.19	0.33	8.99	8.73	7.01	0.28	0.23	0.52	12.07	16.46	6.07
101246302	5.62	3.21	2.91	9.6	6.59	7.94	4.14	3.29	3.74	7.57	6.11	12.98
101246304	51.46	35.17	34.32	130.34	121.61	203.23	25.99	20.93	27.84	187.85	104.91	149.49
101246316	0.94	0	0.01	0.06	0.15	0.07	0	0	0.01	0.2	0.13	0.12
101246317	93.54	116.95	108.87	220.31	258.84	181.42	112.26	114.82	115.48	225.02	486.87	207.86
101246324	23.16	45.86	54.2	15.47	13.35	10.93	74.21	66.45	64.58	18	20.42	20.63
101246325	11.82	8.27	5.87	5.26	4.71	5.27	9.4	13.74	10.11	1.43	3.04	1.82
101246330	0.18	0.43	0.23	0.03	0.03	0.03	0.7	1.77	0.71	0.03	0.03	0.06
101246334	1.06	3.1	2.68	0.3	0.47	0.37	4.11	5.01	3.8	0.41	0.3	0.27
101246336	0.24	0.21	0.01	0.31	0.27	0.23	0.18	0.24	0.19	0.56	0.38	0.33
101246340	4.72	7.04	8.14	1.24	2.4	1.44	3.87	2.61	4.27	1.6	0.76	1.16
101246341	20.02	12.75	10.7	28.18	43.24	17.94	16.42	13.6	14.3	47.46	121.03	30.28
101246345	6.26	12.1	9.08	10.22	14.7	8.56	17.88	14.4	20.89	21.43	23.11	14.48
101246348	1.08	0.43	0.48	0.35	0.58	0.72	0.73	1.37	0.71	0.12	0.41	0.18
101246354	2.13	1.09	0.68	0.53	0.49	0.52	1.08	2.14	1.5	0.22	0.42	0.38
101246356	4.94	0.84	0.56	3.48	1.92	4.22	0.29	0.31	0.17	0.52	20.97	0.83
101246359	2.88	5.31	5.05	3.01	5.23	3.48	5.64	8.29	6.64	16.66	7.28	9.21
101246360	62.58	54.69	55.57	86.39	53.96	81.89	94.38	87.76	62.25	7.13	42.95	21.82
101246361	62.25	32.89	34.69	84.33	69.53	86.06	31.04	30.66	34.95	61.38	55.76	64.31
101246365	85	68.94	52.56	163.09	177.32	136.93	59.26	58.08	50.66	98.8	109.26	58.46
101246367	13.27	3.78	3.61	20.22	11.33	13.41	4.17	4.01	3.63	3.8	6.77	11.94
101246369	20.73	19.64	17.83	9.77	10.25	10.5	24.63	38.21	26.3	8.18	9.17	7.87
101246374	48.49	47.44	44.19	77.86	95.42	91.98	45.6	35.81	58.67	114.96	96.06	71.6
101246377	315.36	285.54	259.43	178.91	173.8	156.32	343.54	498.03	298.64	165.06	148.75	161.55
101246381	48.21	36.9	75.48	115.35	130.73	92.47	33.23	31.12	117.17	151.15	71.9	109.74
101246382	81.59	77.55	74.88	52.01	75.6	63.6	77.2	84.91	81.79	162.03	86.85	137.39
101246383	7.19	5.75	4.24	3.49	2.86	2.92	8.59	8.89	6.95	2.26	2.54	2.38
101246384	0.68	0.17	0.07	4.93	2.06	3.62	1.13	0.94	0.46	2.11	2.13	4.69
101246388	17.46	14.87	13.16	9.06	9.08	9.86	19.04	25.3	21.55	3.71	6.84	3.7
101246390	11.8	3.9	7.91	58.76	39.8	40.96	8.88	8.49	10.38	45.41	28.84	96.78
101246393	0.06	0.18	0.63	1.17	4.49	0.96	0.24	0.3	0.03	0.7	1.01	1.5
101246394	11.76	13.13	11.76	11.97	13.96	18.33	14.98	18.55	15.36	4.59	12.61	3.49
101246396	3.76	0.26	0.75	12.04	16.89	23.57	0.59	0.24	1.27	16.96	13.09	18.57
101246397	23.57	14.47	11.02	27.17	26.12	29.09	12.88	9.61	11.52	19.99	36.3	26.69
101246404	0.24	0.13	0.03	2.27	2.38	14.84	0.05	0.03	0.26	0.05	31.34	0.6
101246409	7.28	3.31	1.87	12	9.64	9.9	3.43	6.87	4.61	11.83	7.15	10.71
101246410	82.2	68.58	61.26	215.33	170.16	174.82	66.66	70.16	56.07	128.98	130.71	168.87
101246417	39.98	29.38	26.75	25.78	21.43	25.13	34.67	50.62	36.42	15.69	18.25	16.14
101246418	16.77	20.04	25.6	63	44.27	43.65	20.63	17.59	18.85	37.36	29.12	37.28
101246420	96.32	23.52	41.49	641.22	203.68	210.8	34.58	26.62	44.8	166.22	320.75	290.67
101246423	9.04	7.45	4.36	1.71	0.55	2.06	8.41	10.3	9.15	0.31	0.45	0.48
101246424	3.21	10.08	14.25	17.11	16.68	14.37	11.56	16.79	11.77	72.99	13.29	37.36
101246428	130.34	98.2	79.92	53.82	45.36	53.17	110.31	156.19	119.77	25.06	36.22	28.06
101246429	34.59	29.26	29.97	41.67	28.79	53.46	34.41	27.3	34.16	9.61	21.16	14.68
101246430	6.94	1.77	1.7	5.78	5.98	23.94	1.62	3.56	3.26	3.27	61.35	2.5
101246431	0.05	0	0	5.26	5.03	26.29	0	0	0	0.07	84.87	1.32
101246432	0	0.07	0	9.61	8.19	52.33	0	0	0	0	86.47	2.47
101246434	14.08	10.58	6.5	4.26	4.66	4.95	4.48	3.59	4.33	2.06	4.46	1.52
101246437	13.82	9.14	7.18	8.53	5.07	5.55	4.11	5.06	4.61	11.22	10.91	6.45
101246438	0.06	0.04	0	0	0	0	0.04	0.03	0.1	0	0	0
101246439	1.07	0	0	1.73	1.49	7.8	0.2	0.08	0.2	0.03	36.63	0.49
101246440	0.41	0.5	0.27	0.86	0.72	1.5	0.44	0.29	1.07	1.54	0.46	2.47
101246448	9.24	147.49	94.49	0	0	0.03	19.94	0	22.1	0	0	0
101246451	9.51	1.08	0.63	0	0.4	0.4	0.95	1.07	0.78	0.16	1.05	0.16
101246456	38.95	64.78	71.49	36.07	26.7	8.76	30.93	24.2	35.02	0	1.75	0.72
101246457	14.46	12.09	14.29	17.67	11.06	21.28	16.04	12.81	16.98	2.31	8.28	6.58
101246459	11.12	1.42	1.21	46.28	34.93	37.73	1.09	1.43	1.36	18.52	15.55	26.88
101246461	3.4	1.93	1.5	7.38	8.7	5.95	1.74	2.15	2.93	5.93	4.22	4.05
101246462	0.46	0.37	0.45	0.85	0.85	0.38	0.15	0.22	0.22	2	0.7	0.69
101246463	15.73	14.95	14.92	10.27	11.35	12.03	0	0	0	0	0	0
101246470	31.75	47.95	57.26	30.77	29.5	38.08	76.33	62.57	69.22	13.39	20.33	15.91
101246472	1.04	5.68	6.25	0.04	0.48	0.51	8.33	19.88	9.29	0.48	0.96	0.68
101246473	0.08	0.21	0.1	0.68	0.56	0.83	0	0.02	0	0	0.04	0.18
101246478	21.91	11.15	7.14	22.97	50.52	24.62	8.54	9.18	10.61	23.31	22.79	8.79
101246479	5.65	3.6	5.4	0.51	2.62	1.85	10.08	12.58	7.31	3.03	2.69	3.17
101246490	28.41	9.34	7.46	25.13	33.02	28.1	6.29	6.67	8.43	30.69	44.11	34.51
101246493	6.76	3.7	2.63	1.63	2.53	1.32	3.18	5.05	2.92	1.71	2.02	2.6
101246495	3.05	8.17	7.35	1.19	2.07	1.94	7.41	7.92	9.71	1.04	4.36	1.13
101246498	3.14	2.51	1.12	5.59	8.54	4.07	1.16	2.67	2.14	4.12	2.43	6.94
101246502	242.58	127.56	96.56	70.34	55.96	53.67	153.97	306.25	139.94	56.03	57.91	62.68
101246505	7.07	3.61	3.12	3.05	3.15	2.37	3.84	5.75	3.85	0.83	1.7	1.33
101246511	4.36	1.73	1.46	12.74	21.25	10.54	1.53	1.31	2.02	41.68	40.69	20.85
101246514	200.62	339.67	366.07	93.74	79.01	101.53	378.59	437.04	392.25	81.8	95.74	57.41
101246516	0.18	0.07	0.05	0.2	0.37	0.28	0.05	0.05	0.09	0.09	0.21	0.3
101246518	24.99	14.53	14.32	28.7	36.25	26.27	11.83	16.27	12.95	23.43	32.83	31.42
101246519	8.79	10.74	10.57	10.14	9.63	15.92	17.02	18.54	18.14	43.33	20.38	39.91
101246530	6.93	2	3.15	0.37	0.5	0.61	2.9	1.75	2.41	0.37	1.62	0.12
101246536	0.81	0.69	0.83	0.78	0.53	0.64	1.17	1.42	1.6	0.09	0.34	0.16
101246540	1.99	5.9	7.2	0.2	0.33	0.2	4.52	3.76	5.05	0.45	0.37	0.32
101246541	14.79	16.02	14.93	30.25	32.76	28.78	16.19	17.96	10.96	26.18	21.64	19.62
101246543	3.72	1.71	1.18	8.05	10.74	9.29	1.56	1.89	2.95	22.99	19.34	15.93
101246550	74.56	32.2	35.29	60.54	89.09	75.39	27.95	19.87	33.24	105.08	85.29	132.32
101246552	0.19	0.04	0.05	0.32	0.33	0.36	0.07	0.04	0.03	0.21	0.2	0.32
101246554	23.2	10.29	8.73	33.83	20.59	29.83	11.48	11.88	10.45	15.42	19.49	24.06
101246557	0.3	0.16	0.04	1.63	1.41	8.64	0	0	0.04	0.08	13.08	0.34
101246558	0.03	0	0.03	0.03	0	0.03	0	0	0	0.09	0.06	0.09
101246560	0.28	1.07	0.41	0.61	0.7	0.64	0.28	0.18	0.36	0.74	0.47	1.02
101246564	27.07	15.65	13.93	45.66	54.53	41.31	15.3	14.54	13.69	70.23	38.34	74.33
101246565	0.98	1.35	1.01	0.16	0.42	0.25	1.06	1.02	1.33	1.14	0.21	0.14
101246566	121.47	92.94	73.56	44	31.71	30.52	104.68	146.31	95.27	48.85	44.21	23.86
101246567	5.24	4.58	2.99	0.8	0.47	0.87	5.47	4.77	5.4	1.44	0.99	0.89
101246576	2.72	1.02	0.69	2.11	2.11	4.78	1.06	1.54	1.27	1.42	16.43	1.36
101246577	49.29	29.7	34.78	83.26	146.3	98.73	18.66	28.13	15.78	108.13	53.1	171.79
101246579	61.78	29.25	33.82	147.63	135.74	169.53	31.07	20.07	38.13	84.67	88.81	139.46
101246585	14.49	13.83	11.34	7.93	8.15	10.03	14.01	15.63	12.97	5.46	7.51	4.83
101246586	0.72	0.04	0.05	1.02	0.92	4.31	0.05	0.05	0.02	0.07	16.95	0.55
101246589	41.09	46.56	47.78	28.07	32.82	30.59	57.01	61.95	56.83	24.44	27.5	22.4
101246594	216.97	91.88	56.33	29.95	51.36	5.71	40.77	58.45	34.7	5.07	83.36	5.38
101246595	1.11	3.72	1.87	0.11	0.07	0.18	2.86	2.91	4.8	0.11	0.22	0.11
101246598	1.01	0.48	0.22	11.23	13.19	4.74	0.22	0.38	0.16	0.78	94.65	0.34
101246603	14.84	1.18	2.24	0	0.71	0.19	1.44	1.73	0.92	0.19	0.14	0
101246605	46.86	130.02	140.95	31.09	34.52	49	169.38	143.52	128.4	42.03	55.4	51.75
101246606	9.49	8.15	7.33	15.57	23.87	19.83	8.81	8.48	8.67	33.62	13	55.82
101246610	7.16	15.99	7.45	2.33	3.95	1.77	14.17	18.3	17.95	2.18	2.06	3.08
101246611	3.94	1.88	1.19	8.75	8.5	5.39	1.31	1.51	1.86	5.38	10.07	10.02
101246612	0.37	0.27	0.32	0.16	0.73	0.28	0.12	0.12	0.12	0.73	0.2	1.9
101246615	1.42	0.64	0.35	1.23	2.41	2.32	0.27	0.42	0.53	2.16	1.39	2.13
101246616	46.41	57.63	58.52	28.59	28.4	30.77	74.85	71.66	77.35	19.84	30.69	13.44
101246620	1.26	0.65	0.67	1.85	2.21	2.12	0.23	0.16	0.71	1.04	0.37	1.23
101246622	0.81	4.4	3.52	0.05	0.2	0.19	3.75	0.52	8.94	0.18	0.21	0.17
101246624	15.02	8.09	7.63	11.78	10.56	12.47	6.69	9.09	8.58	16.85	31.72	14.85
101246626	0.57	0	0.17	0.35	2.3	1.86	0.11	0	0.11	0.23	1.33	0.69
101246627	232.56	296.25	427.75	295.29	167.59	252.47	566.14	428.34	366.26	60.31	147.25	179.11
101246628	16.32	19.46	22.04	49.96	51.26	76.2	20.92	16.05	20.62	40.51	30.01	58.97
101246638	0.12	0	0	0.68	0.34	2.5	0.07	0.05	0.02	0	5.6	0.12
101246639	7.89	43.13	42.65	0.19	0.2	0.1	41.24	57.38	51.49	0	0	0.1
101246641	14.77	12.48	13.3	12.32	20.05	15.87	10.77	8.85	7.73	26.57	18.97	17.32
101246642	44.65	21.81	24.19	9.6	7.2	2.33	11.4	13.36	17.64	5.06	26.83	1.61
101246643	12.77	2.87	1.85	3.59	2.99	3.2	3.39	5.72	3.89	1.02	2.24	1.94
101246648	3.03	8.44	6.9	3.09	5.69	4.07	4.67	6.79	5.51	29.3	9.4	4.4
101246649	0	0	0	1.33	1.67	0.44	0	0	0	0	187.2	2.42
101246651	236.71	160.27	200.7	6.44	10.36	7.51	3.95	4.07	2.56	13.12	4.68	15.98
101246656	69.09	62.02	64.35	63.06	75.77	75.32	29.81	24.95	29.12	26.57	28.84	30.8
101246658	986.39	948.12	763.28	434.38	367.13	357.76	1135.18	1747.41	1010.67	450.14	444.15	395.21
101246661	8.38	8.95	6.85	3.68	7	5.02	9.66	12.82	11.77	4.59	4.58	3.85
101246662	79.06	63.07	67.31	26.74	45.19	29.59	46.19	36.64	47.43	37.88	54.99	16.38
101246664	17.46	11.88	10.38	23.5	23.75	31.98	12.41	11.78	12.38	12.67	18.75	13.15
101246665	1.52	0.71	1.04	4.57	2.39	14.04	8.09	13.59	0.57	6.33	5.47	4.5
101246666	1.37	0.08	0.67	3.43	3.69	0.59	0	0.16	0.33	16.33	0.26	2.04
101246667	0.04	0	0	0.04	0.08	0	0.04	0	0	0.42	2.22	0
101246669	105.28	133.47	142.53	41.17	62.23	84.14	121.39	129.11	135.87	146.46	77.84	178.87
101246670	8.18	6.05	5.9	3.95	2.86	3	5.85	5.65	8.44	22.36	12.81	16.9
101246671	1.28	0.93	0.33	0.06	0.08	0.31	0.71	1.94	1.04	0.01	0.06	0
101246672	41.5	28.98	24.4	94.55	100.53	116.27	25.16	24.25	29.43	94.3	84.75	88.26
101246675	0	0.89	2.66	2.98	4.51	14.44	0.22	0.02	0.48	0.07	65.04	1.22
101246680	1.44	2.93	3.23	5.21	6.25	7.18	1.73	2.06	3.23	5.91	3.24	4.99
101246681	0.19	4.37	2.76	130.59	18.55	60.09	2.38	6.06	1.41	8.4	6.14	23.36
101246683	6.78	2.59	2.66	15.87	19.36	18.12	1.85	2.37	2.78	20.98	8.18	23.14
101246684	23.96	13.97	11.2	74.53	113.96	108.64	7.78	5.04	13.47	30.34	51.77	56.07
101246685	0.03	0.03	0	0.29	0.46	0.38	0	0	0	0.29	0.13	0.13
101246686	0.8	0.25	0.07	1.17	1.97	2.97	0.14	0.04	0.35	1.24	1.64	1.69
101246688	17.01	14.28	12.73	40.53	51.68	39.55	13.47	12.21	15.88	16.41	82.83	17.67
101246690	0.06	0.07	0.02	1.46	0.52	0.14	0.03	0.11	0.07	0.26	0.15	0.12
101246692	2.19	3.97	5.22	6.8	9.08	6.65	5.15	8.42	4.39	26.4	9.38	13.19
101246693	35.77	42.78	43.32	27.38	27.02	26.08	49.82	57.19	50	22.3	24.06	20.02
101246694	7.44	5.53	5.19	35.2	34.48	36.76	5.48	4.05	3.17	57.46	19.18	97.85
101246697	25.02	24.45	24.36	13.01	16.99	17.66	30.86	32.44	30.38	11.7	16.07	11.21
101246700	14.74	0.03	0.03	2.44	4.01	12.37	0	0	0	0.9	35.1	0.9
101246701	18.41	20.97	14.03	7.94	8.19	8.06	15.35	16.65	12.42	13.07	11.15	8.84
101246704	1.65	3.09	2.51	1	0.8	0.62	4.24	5.39	3.83	1.09	0.94	1.15
101246706	2.11	7.51	5.92	0.85	2.9	1.77	9.11	16.98	8.01	1.2	0.85	2.22
101246713	48.18	33.86	30.42	27.15	36.48	13.89	27.59	21.13	27.4	74.33	52.05	20.56
101246714	0.28	0.25	0.18	2.48	2.59	1.14	0	0.04	0.69	0.61	0.53	2.38
101246715	13.74	12.73	10.5	7.69	6.02	8.96	15.22	19.77	16.52	3.83	5.43	4.09
101246719	104.49	79.53	80.53	188.99	228.81	183.73	105.46	111.69	89.58	436.04	161.96	600.28
101246727	1.37	1.2	1.83	3.51	5.1	5.68	0.91	1.47	1.43	4.29	3.02	8.6
101246729	1.51	7.93	3.24	0.68	0.61	0.47	2.42	3.9	4.31	0.79	0.75	0.69
101246730	23.92	37.53	15.98	34.1	14.66	39.62	24.33	42.6	38.87	8.31	25.95	10.69
101246731	0.39	0.65	0.33	0.15	0.24	0.19	1.19	2.24	0.75	0.34	0.29	0.1
101246732	10.31	0.65	0.75	0.71	0.52	0.72	0.59	0.46	0.68	0.49	0.48	0.35
101246736	2.67	4.67	2.45	10.35	7.33	5.6	9.07	1.27	8.39	12.84	9.14	9.63
101246737	2.67	2.64	1.39	0.62	0.6	0.6	1.84	3.73	1.29	0.86	0.96	0.71
101246738	2.52	1.1	0.79	2.77	7.68	4.19	0.76	0.62	1.23	3.29	2.37	4.65
101246746	0.3	0.1	0.45	0.81	0.41	1.44	0.3	0.34	0.2	0.15	5.07	0.7
101246748	2.6	1.38	1.41	0.05	0.05	0	1.6	2.23	1.66	0.23	0.28	0.05
101246754	4.45	3.23	2.46	7.36	7.82	7.79	3.32	3.49	3.86	3.4	7.38	4.73
101246758	419.73	548.28	672.16	463.94	290.31	345.49	773.31	735.52	563.84	183.64	278.82	192.46
101246760	81.66	99.56	88.13	15.74	25.89	0.73	92.08	131.53	142.24	3.01	70.84	1.99
101246761	0.97	0.17	0.35	4.25	4.15	4.75	0.04	0	0.12	0.2	0.18	0.05
101246762	2.76	2	1.19	1.42	1.48	1.36	1.75	2.24	1.61	0.32	0.84	0.26
101246763	15.03	7.84	9.47	22.22	38.98	31.72	7.91	4.56	8.01	77.81	30.64	193.44
101246764	305.42	282.35	288.57	172.36	132.12	122.42	414.86	569.18	330.46	128.07	130.89	135.07
101246765	3.97	5.54	3.97	1.53	2.29	1.75	4.27	9.05	2.88	4.58	9.47	3.11
101246771	3.74	4.65	5.45	8.07	8.25	7.54	3.23	2.8	3.66	3.18	3.51	2.65
101246773	1.61	0.7	0.55	1.23	1.47	1.15	0.64	0.58	0.52	1.33	1.58	1.29
101246779	3.24	9.09	8.81	1.6	2.97	2.16	10.65	10.56	10.64	3.59	2.97	4.4
101246786	13.37	5.11	3.84	7.08	10.97	10.17	3.61	3.89	3.77	8.93	8.23	8.7
101246790	17.6	12.32	12.75	8.54	7.2	8.66	14.94	19.11	13.24	4.85	8.11	4.36
101246791	0.63	0.34	0.23	1.78	1.54	1.12	0.31	0.38	0.31	0.9	0.63	1.02
101246792	9.77	7.68	5.6	26.8	53.78	29.97	4.14	3.62	3.31	69.08	59.4	41.67
101246794	1.61	0.89	0.98	0.28	0.43	0.08	2.1	2.6	2.39	0.32	1.29	0.64
101246799	6.32	5.64	3.37	2.78	1.85	2.53	5.92	10.82	5.77	1.46	1.5	2.13
101246803	3.02	3.2	1.51	3.22	1.34	1.53	2.55	3.43	4.04	4.55	6.89	7.22
101246804	56.66	120.7	95.63	36.45	39.24	38.62	107.95	137.96	109.81	18.65	24.06	17.66
101246810	5.86	2.45	2.45	0.47	1.34	0.68	8.26	1.5	12.61	2.14	2.97	0.4
101246811	98.54	145.09	156.02	65	45.2	67.24	177.85	163.35	178.3	73.04	69.95	46.86
101246812	0.3	0.37	0.05	0.68	1.18	0.21	0.23	0.2	0.33	3.81	0.43	0.34
101246817	34.14	0.12	0.19	0.13	0.13	0.43	0.06	0	0	0	3.79	0.19
101246821	200.98	183.69	167.93	217.72	308.76	294.65	154.79	119.8	165.13	301.22	278.52	290.58
101246825	56.94	68.26	70.18	28.07	40.93	27.06	68.71	78.92	63.13	25.51	31.2	18.39
101246827	11.37	5.28	3.79	4.79	3.93	4.13	4.99	9.26	5.64	1.33	2.25	2.24
101246828	111.83	115.37	111.4	56.49	50.57	48.34	180.14	249.86	165.86	43.74	47.8	49.19
101246829	134.3	152.37	165.3	55.74	49.55	50.45	112.11	87.23	132.77	123.43	78.08	7.74
101246832	4.84	6.27	3.61	0.47	0.6	0.58	5.39	9.69	6.13	0.23	0.36	0.39
101246835	93.42	112.94	144.11	168.65	168.41	166.27	119.59	127.24	123.91	259.09	217.59	211.18
101246836	8.51	4.94	3.97	29.02	33.01	11.46	3.26	3.27	4.91	11.21	11.65	11.41
101246840	2.99	1.18	1.25	5.16	6.33	7.61	1.78	1.27	1.36	5.51	4.01	5.93
101246846	0	0	0	0.58	0.3	1.65	0	0	0.07	0	59.88	0.65
101246848	45.87	11.24	12.14	0	0.15	0.34	96.21	3.99	103.59	1.33	0.45	0.25
101246850	230.85	167.95	173.67	55.66	50.9	43.8	310.76	480.58	244.89	38.66	49.71	35.39
101246858	2.19	5.07	2.04	0	0	0	8.72	0.11	20.12	0.06	0	0.06
101246861	0.83	0.99	0.88	0	0.69	0	1.49	1.65	1.27	0.55	0.63	0.21
101246864	16.47	29.87	27.09	4.18	2.5	6.78	46.88	49.66	49.83	2.86	1.67	3.11
101246865	0	0	0.04	1.55	0.93	1.04	0	0	0.04	0.48	0.62	0.35
101246866	0.05	0	0	1.69	1.25	3.89	0	0	0	0	73.02	0.54
101246867	0.36	0.66	0.6	0	0	0	0	0	0	0	0	0
101246870	293.99	197.73	305.59	561.6	636.05	977.3	265.85	113.06	190.82	1065.26	196.41	2322.06
101246874	0.23	0.17	0.39	0	0	0	0.44	0.38	0.38	0	0.11	0
101246876	2.09	0.78	1.13	1.76	2.57	1.68	0.7	0.29	0.91	4.62	1.01	1.48
101246877	3.96	9.74	8.46	2.11	2.56	1.94	16.61	2.96	20.13	2.25	2.15	1.49
101246879	12.16	16.22	18.19	1.17	1.64	1.75	18.4	17.8	21.96	0.79	5.52	0.77
101246880	12.49	12.45	10.63	6.22	7.69	8.53	13.34	17.49	13.9	2.65	5.26	2.96
101246885	24.15	21.87	19.2	7.65	8.27	8.44	27.09	34.58	23.76	7.41	9.4	6.09
101246889	1.64	4.01	2.03	0.06	0.09	0.08	4.64	0.05	10.3	0.05	0.14	0.05
101246891	8.52	6.18	8.87	14.58	23.78	24.15	6.36	3.45	4.56	28.47	17.44	34.96
101246893	8.12	2.86	1.79	0.35	0.5	0.64	2.25	2.33	2.73	0.48	1.35	0.26
101246899	1.44	0.74	0.5	0.71	0.51	0.59	0.82	1.7	0.83	0.13	0.58	0.19
101246903	48.04	34.03	33.35	48.05	52.95	39.82	25.33	23.05	27.85	52.53	68.6	47.09
101246906	93.65	64.4	54.94	49.27	46.35	43.6	71.86	109.18	71.38	24.63	40.65	26.67
101246907	0.17	0.06	0.25	0.65	0.8	0.4	0.25	0.04	0.19	0.75	0.43	0.64
101246909	0.82	0.12	0.12	1.07	1.29	1.69	0.28	0	0.03	0.53	38.39	0.85
101246912	4.69	2.98	1.94	3.72	4.27	6.28	2.18	2.22	2.59	3.6	10.5	3.01
101246918	31.14	30.79	30.01	15.94	17.04	14.47	38.91	52.46	32.53	9.49	13.17	8.98
101246921	6.56	15.4	17.34	0.95	0.73	0.68	21.57	27.32	22.35	2.79	1.65	3.31
101246927	0	0.03	0	0.04	0.47	0.25	0	0	0.04	0.07	3.39	0.15
101246929	10.77	8.11	8.48	5.13	4.93	4.57	7.18	9.37	7.39	2.04	3.25	2.05
101246932	1	8.34	1.3	0.16	0.47	0.5	1.36	0.67	1.47	0.41	12	0.35
101246937	8.44	5.11	4.6	1.04	2.13	0.63	0.06	0	0.13	0.07	0.32	0
101246938	15.51	22.01	21.48	9.89	11.81	13.54	25.38	27.57	29.55	8.4	8.87	7.31
101246939	0.61	0.94	0.96	1.05	3	1.42	0.42	0.91	0.66	2.7	0.58	3.17
101246948	0.4	0.06	0.49	0.44	1.08	1.8	0.63	0.45	0.68	2.1	12.54	3.15
101246949	35.88	31.84	35.25	26.45	23.56	21.94	52.41	67.31	43.61	19.1	26.28	19.05
101246952	52.95	40.9	45.28	120.38	115.86	127.74	37.81	31.84	41.4	42.89	70.69	61.67
101246954	1	3.44	2.78	2	4.15	3.01	1.05	2.12	1.71	7.01	2.08	5.94
101246960	27.52	29.32	29.88	19.09	22.29	23.59	46.24	54.24	39.59	17.51	22.09	14.02
101246961	494.39	628.96	575.43	2043.65	726.69	116.85	245.96	195.69	143.81	6151.46	1641.13	1286.04
101246968	37.19	33.55	31.38	21.38	36.5	33.24	28.66	15.76	30.01	57.52	37.5	59.41
101246970	25.39	1.42	1.04	20.18	21.09	28.12	1.79	2.27	1.41	53.16	99.31	25.47
101246975	1	0.13	0.07	1.88	1.01	1.51	0.33	0.45	0.26	2.6	1.21	1.8
101246976	101.28	267.19	326.2	86.26	37.48	55.53	456.96	429.4	283.48	154.18	36.98	768.5
101246977	0.44	0.13	0.09	1.43	1.83	2.27	0.12	0.18	0.23	1.58	0.77	2.07
101246978	93.78	24.77	19.08	40.43	28.24	8.31	13.78	13.18	16.36	49.72	46.9	13.8
101246986	16.66	9.33	6.15	14.29	19.26	26.22	6.95	8.55	7.35	5.95	9.11	8.73
101246988	335.28	244.7	210.3	169.1	131.79	115.42	317.72	467.36	262.55	107.41	123.4	111.93
101246992	0.13	0.27	0.17	0.45	0.37	0.8	0.11	0.44	0.67	1.43	0.56	1.48
101246993	17.96	11.64	7.68	1.93	0.66	1.76	13.78	19.5	14.68	0.61	0.2	0.86
101246994	68.89	65.33	73.7	91.39	104.84	105.23	54.06	50.24	66.29	104.62	123.33	85.17
101246996	57.07	66.13	76.16	143.79	129.98	151.16	73.54	55.28	65.72	37.49	81.36	45.19
101246998	6.84	5.55	6.1	5.87	7.65	8.04	4.73	3.58	6.36	11.91	6.17	14.6
101247008	85.86	87.12	75.98	34.79	17.51	27.77	123.98	203.78	120.91	4.3	11.2	12.9
101247011	22.14	2.14	1.49	7.84	9.67	10.28	6.05	6.32	3.42	6.38	17.18	7.85
101247013	0.51	0	0.07	0.37	0.62	0.57	0.07	0.18	0	0.95	1.03	0.51
101247014	2.36	0.51	0.55	2.29	2.01	1.77	0.59	0.57	1.06	2.41	2.2	2.56
101247016	0.94	0.66	0.68	6.45	6.27	5.14	0.44	0.34	1.21	5.5	4.09	9.95
101247017	7.64	7.32	7.03	32.5	36.58	38.34	9.17	6.17	6.03	29.8	21.86	47.36
101247023	559.35	290.54	285.43	3717.97	754.14	667.83	183.54	344.83	174.31	239.11	836.52	1248.63
101247024	2.05	1.77	2.35	6.81	7.21	10.65	6.26	3.5	12.41	9.56	6.18	4.71
101247025	5.76	4.27	3.25	1.87	2	2.84	4.41	7.68	4.48	0.41	2.32	0.54
101247026	28.39	17.14	16.04	36.71	35.08	39.27	19.27	15.1	15.27	31.32	31.22	40.69
101247028	11.5	12.91	13.98	0.22	0.29	0.17	8.47	1.65	9.86	1.07	1.79	1.07
101247031	14.22	13.13	10.96	7.8	6.11	6.86	18.52	26.33	17.75	2.92	4.94	4.28
101247032	56.55	107.56	105.47	31.98	87.41	97.19	109.39	99.24	138.01	43.61	32.71	36.18
101247033	7.7	1.96	1.56	1.28	0.62	1.16	2.2	1.66	3.09	1.23	40.26	1.16
101247034	118.59	133.89	121.52	50.36	52.32	60.03	134.57	158.7	132.81	29.02	36.59	24.76
101247035	0.32	0.27	0.55	0.75	1.3	1.14	0.23	0.4	0.27	0.69	0.51	1.2
101247036	50.7	75.86	57.34	36.99	76.59	41.84	52.27	52.46	47.58	188.36	43.48	181.28
101247037	5.69	5.18	4.27	8.57	17.2	5.31	5.86	6.09	6.28	3.58	5.43	2.96
101247043	28.79	65.23	69.73	23.42	26.03	27.11	65.56	58.55	70.43	14.84	23.98	13.49
101247044	0.23	0	0	14.47	18.32	82.68	0.22	0.21	0	0.23	247.15	4.24
101247045	0.87	0.46	0.6	4.21	4.63	16.95	0.69	0.25	0.25	0.26	28	2.48
101247047	1.77	0.18	0.22	9.66	3.74	5.93	0.22	0.14	0.79	5.87	3.04	8.7
101247048	5.27	1.09	1.41	26.18	41.29	17.02	1.33	0.38	0.93	21.39	54.03	29.45
101247051	34.68	41.39	36.37	5.27	9.09	6.7	57.66	83.04	69.99	10.2	14.17	10.62
101247053	174.54	118.76	102.72	0.03	0	0.04	12	0	11.61	0	0.04	0
101247054	139.49	74.17	83.55	57.51	50.51	47.4	40.8	41.25	41.97	45.84	50.09	46.39
101247062	4.49	3.01	2.33	7.31	8.95	9.44	1.92	1.91	2.72	4.58	6.1	8.01
101247064	7.1	10.34	10.23	2.33	2.8	1.5	12.55	17.27	11.17	2.62	3.01	1.57
101247067	100.47	51.76	43.71	45.88	26.53	35.87	60.81	90.47	53.37	4.55	12.77	4.8
101247070	320.87	334.83	343.62	169.82	124.27	133.81	472.91	601.46	408.61	124.48	133.3	128.89
101247071	11.38	8.59	7.64	5.59	6.43	5.9	10.25	13.29	9.46	4.49	4.88	3.93
101247075	0.93	0.57	0.91	7.78	19.58	12.71	0.26	0.26	0.51	2.58	16.92	2.02
101247077	10.25	7.03	6.09	12.13	13.06	10.55	14.58	17.22	13.49	9.25	14.3	11.82
101247080	7.36	15.14	15.25	0.55	0.82	1.31	28.8	21.79	29.09	1.08	1.28	0.38
101247082	11.86	15.03	15.29	5.07	7.6	8.53	27.89	40.39	26.18	3.52	5.55	7.22
101247083	0.06	0.36	0.37	14.67	17.01	65.26	0.25	0.24	0.18	0.82	220.52	5.67
101247087	12.83	9.42	7.04	12.76	14.53	12.86	8.65	8.89	7.62	16.53	9.77	18.73
101247088	3.12	1.97	1.31	1.69	1.46	1.95	1.82	2.88	2.76	0.25	1.64	0.36
101247090	48.89	78.09	75.17	5.21	9.56	4.67	89.14	104.11	95.74	9.84	13.37	4.13
101247092	13.84	10.84	9.06	16.9	22.27	21.78	10.8	8.14	15.85	25.3	24.41	23.35
101247098	14.5	4.68	3.6	7.35	7.49	6.48	3	2.34	3.61	13.94	9.77	8.44
101247100	0.04	0	0	0	0.04	0	0	0	0	0.4	0.28	0.04
101247101	1.76	0	0.16	0.08	0	0.16	0	0	0	0	31.78	0
101247104	28.76	31.24	23.73	23.25	18.82	17.87	36.96	52.95	33.07	15.56	16.38	16.34
101247111	18.86	27.46	34.89	51.55	54.69	59.78	31.53	22.36	18.19	52.1	39.53	61.94
101247114	17.59	23.77	22.72	10.92	10.85	11.97	27.39	25.68	25.31	9.47	9.88	6.82
101247117	6.75	4.81	3.97	30.01	32.57	30.92	4.48	6.12	3.61	21.64	18.45	49.94
101247118	23.93	29.17	30.17	12.88	15.99	12.1	32.03	35.89	31	11.34	11.63	9.32
101247124	10.41	10.91	20.72	3.43	4.89	2.66	18.02	5.81	31.4	9.6	24.68	5.53
101247128	6.22	13.22	21.03	23.1	28.17	41.77	14.44	7.99	16.9	15.74	52.1	55.82
101247129	0.91	0.17	0.08	0	0	0.04	0.06	0.17	0.08	0.02	0	0
101247130	1.39	4.53	6.3	2.93	1.83	0.72	3.15	3.48	6.02	1.16	1.39	1.01
101247131	49.69	19.76	13.68	15.39	10.13	12.15	19.93	34.77	17.57	2.71	9.36	4.18
101247133	0.14	0.62	0.57	0	0	0	0.28	0.69	0.21	0	0	0
101247147	37.7	33.56	29.03	37.73	40.68	44.16	28.11	27.72	24.38	42.21	44.93	54.94
101247149	12.59	9.84	8.63	37.89	97.9	52.82	8.35	7.45	11.71	228.84	158.43	217.77
101247154	0.19	0.18	0	1.58	1.58	1.37	0.09	0.26	0.36	1.11	0.75	0.83
101247158	12.8	0.22	0.45	0.43	0.77	0.49	0.11	0	0.2	0.56	2.86	0.31
101247163	114.49	92.69	79.33	58.75	48.46	52.75	127.7	169.08	112.82	33.37	39.63	39.42
101247164	18.56	4.57	3.95	0.01	0.09	0.1	9.69	11.24	10.94	0.01	0.85	0
101247168	1.19	1.36	0.85	0.64	0.23	0.18	1.03	5.18	1.77	0.36	1.24	0.55
101247171	0.69	2.6	0.5	24.63	12.13	16.24	0.31	0.49	0.4	20.52	13.52	7.58
101247173	5.32	18.68	15.5	3.28	5.77	5.32	18	17.27	29.22	7.92	5.42	4.25
101247174	34.1	13.92	7.66	58.89	62.49	31.4	6.58	17.66	7.9	57.11	23.6	72.74
101247176	1.45	0.8	0.73	1.07	0.75	0.79	0.33	0.41	0.31	0.4	0.48	0.23
101247177	4.64	5.81	4.24	2.78	1.96	1.81	5.08	10.17	6.35	3.48	3.11	1.77
101247179	13.16	14.68	11.85	8.84	12.43	9.79	21.37	17.62	26.08	8.26	8.31	8.41
101247182	18.56	10.76	12.11	48.23	59.72	53.23	6.39	4.82	6.84	39.24	62.02	73.03
101247183	8.89	10.97	10.94	16.84	31.85	18.6	5.16	4.55	6.44	27.27	21.38	29.47
101247185	118.66	140.23	141.39	65.9	62.6	69.78	222.79	310.6	204.28	70.92	57.25	57.55
101247187	4.76	1.26	0.7	2.31	2.28	0.77	0.52	1.12	1.06	5.12	2.2	0.9
101247189	4.49	4.83	7.73	15.47	23.59	22.04	4.88	2.64	5.37	33.34	19.45	27.5
101247192	0	0.09	0.06	0.03	0	0.12	0.03	0.09	0.03	0	2.2	0.06
101247195	99.37	86.48	83.13	93.9	97.38	121.43	106.79	110.05	101.7	137.09	287.4	144.99
101247196	9.24	0.83	1.19	52.03	57.48	84	1.27	1.84	2.03	50.18	34.04	40.7
101247199	0.9	1.34	2.26	3.97	2.7	4.66	0.5	0.12	0.87	6.49	3.87	6.2
101247210	17.14	12.43	14.81	31.88	34.65	45.18	13.89	9.53	15.62	33.56	28.15	37.19
101247213	86.67	161.55	136.89	59.98	65.41	28.96	162	193.66	112.42	58.17	36.36	41.86
101247215	12.74	16.81	17.1	4.32	5.26	4.99	15.29	16.61	17.85	6.15	4.87	4.95
101247216	1.51	11.21	10.17	0.1	0.12	0.25	14.88	20.7	17.55	0.1	0.03	0.06
101247223	10.47	10.54	9.65	12.68	12.43	10.49	4.99	7.2	6.4	2.39	3.18	2.77
101247232	103.85	18.43	14.02	5.18	3.49	9.64	8.36	4.6	11.11	1.07	2.95	0.36
101247236	0.37	0	0	0	0	0.03	0	0	0.03	0.73	0.4	0
101247244	654.58	603.23	611.15	312.22	254.15	228.92	859.29	1239.33	669.3	198.17	249.09	223.65
101247247	82.79	28.72	29.96	145.98	174.34	161.43	32.95	26.35	28.68	167.9	193.58	105.84
101247255	0.99	0.31	0.2	1.49	1.05	1.28	0.46	0.25	0.65	0.35	4.45	1.01
101247256	87.33	88.82	76.32	39.51	41.29	48.77	92.6	112.32	95.23	41.38	44.88	34.41
101247257	269.75	240.61	257.18	80.81	113.55	19.02	57.04	38.5	18.3	306.48	56.5	129.49
101247259	6.82	11.34	12.82	1.14	0.96	0.8	18.05	12.55	27.66	0.99	2.37	1.04
101247261	0.17	0.16	0.05	1.61	1.11	0.86	0.3	0.16	0.43	0.69	0.66	1.38
101247269	7.31	4.48	3.48	3.62	4.35	2.65	3.39	6.2	3.58	0.78	2.23	0.73
101247271	14.25	11.6	9.42	7.31	4.43	7.76	15.03	18.67	15.37	6.99	7.16	6.38
101247272	70.48	26.38	21.01	149.32	184.6	146.5	15.04	18.36	23.04	92.39	150.32	109.02
101247276	3.84	7.56	3.7	4.08	17.58	4.21	5.94	14.1	3.44	0.96	1.19	2.57
101247280	49.86	18.33	19.26	28.98	41.29	45.85	14.96	16.92	19.44	65.33	44.08	19.47
101247282	29.29	12.29	8.54	9.03	5.5	6.21	12.9	24.23	14.54	2.75	4.49	4.59
101247283	1.16	0.68	0.37	0.88	0.48	0.67	0.61	1.25	0.6	0.06	0.44	0.17
101247284	3.34	0.82	0.69	10.81	9.47	8.95	0.58	0.43	0.68	0.78	6.27	1.11
101247287	11.6	10.19	4.14	7.15	25.6	3.39	1.2	2.12	1	8.56	0.33	2.94
101247288	1.74	0.98	0.32	6	5.94	0.74	0.29	0.57	0.76	2.49	1.92	1.78
101247293	27.04	27.04	26.81	53.7	69.85	77.28	26.68	19.44	27.9	84.32	39.09	111.51
101247294	1.21	2.4	0.58	0.44	1.65	0.76	5.38	11.62	5.2	0.64	0.82	0.85
101247302	24.76	16.76	19.79	29.87	18.64	32.38	7.67	4.6	7.79	5.39	7.77	12.22
101247305	5.89	2.38	6.37	0	0	0	18.1	21.16	18.02	0.23	0.46	0.08
101247310	335.21	333.96	363.16	166.08	105.57	126.55	525.93	678.6	393.28	80.74	121.45	98.49
101247314	4.44	7.51	6.19	0.76	1.78	1.28	8.59	10.91	8.42	1.3	0.87	0.7
101247315	14.9	38.07	21.54	1.34	1.96	1.17	30.71	41.11	34.95	6.64	3.81	1.46
101247316	6	1.67	1.22	10.06	11.07	9.65	2.27	2.34	2.16	7.36	6.13	6.68
101247319	1.23	0.75	0.49	6.25	5.45	3.69	0.38	0.38	0.99	3.52	2.08	2.74
101247326	0.1	0.09	0	6.03	5.24	31.02	0	0.09	0	0.1	66.85	1.31
101247327	13.46	4.63	4.4	3.13	3.29	4.23	3.06	4.38	4.2	10.22	6.54	3.98
101247331	16.99	22.57	35.27	8	15.4	6.69	20.74	22.14	20.64	47.55	8.96	32.89
101247334	0.26	2.33	1.91	0.2	0.4	0.25	2.24	3	2.98	0.34	0.11	0.13
101247335	7.02	5.9	6.31	4.36	5.07	5.57	5.3	5.29	4.49	1.57	2.31	1.91
101247336	12.82	8.69	10.62	0	0	0.66	3.34	0	4.09	0	0	0
101247340	13.24	7.61	5.54	28.78	40.43	28.73	4.45	5.09	4.02	16.04	17.72	21.81
101247342	77.67	29.78	27.78	102.32	118.98	145.42	26.04	24.86	30.84	50.17	94.21	62.3
101247352	115.02	105.72	87.49	39.46	20.42	20.53	108.43	129.3	97.76	21.43	29.91	28.63
101247354	0.05	0	0.05	0.28	0.37	0.86	0	0.04	0	0	14.42	0.18
101247355	1142.34	1612.05	1860.34	677.58	703.93	649.49	2389.04	3008.42	1942.66	809.35	675.56	761.28
101247359	0.06	0.02	0.02	0	0.04	0.04	0.14	0.22	0.36	0.39	1.21	0.66
101247361	4.39	2.01	1.56	1.79	1.34	1.65	2.6	2.58	2.11	1.55	0.66	0.56
101247363	2.23	0.07	0	0.77	2.46	2.64	0.08	0.07	0.22	0.84	2.7	0.31
101247368	9.8	8.5	10.01	28.18	46.39	37.05	7.26	5.46	7.38	32.52	24.21	35.14
101247369	92.61	26.04	26.36	160.34	82.53	163.4	11.24	11.4	18.24	105.04	113.38	118.07
101247371	71.22	78.31	76.53	36.29	45.46	39.72	87.9	109.41	84.16	33.42	33.69	32.64
101247372	11.26	5.37	4.7	11.3	13.6	12.91	4.36	6.31	7.04	14.96	15.75	11.92
101247374	49.33	1.59	1.42	3.89	5.04	2.06	1.42	1.49	1.63	11.63	10.12	2.91
101247376	162.82	407.79	479.12	179.54	177.68	217.4	561.23	587.49	530.57	136.74	122.29	189.64
101247378	0.04	0.17	0.37	0	0	0.04	0.29	0.32	0.66	0	0.04	0
101247380	0	1.03	0.46	0.07	0.11	0	0.39	0.97	0.73	0	0	0.04
101247382	9.06	7.45	6.83	16.22	17.96	18.22	6.54	7.4	6.67	15.65	25.13	14.22
101247383	53.14	46.12	40.95	28.23	23.39	25.61	50.95	70.87	55.29	15.78	20.76	14.93
101247384	1295.47	1010.29	849.64	553.2	486.04	467.36	1159.23	1586.92	1000.34	461.59	453.09	490.34
101247385	18.36	16.09	17.43	19.08	28.36	27.16	21.27	17.54	16.37	56.19	48.9	59.27
101247386	13.45	9.41	9.63	9.06	14.68	16.15	9.91	12.54	10.55	109.34	128.83	25.81
101247387	2.02	0.52	0.65	6.19	5.62	5.31	0.45	0.47	0.59	7.28	5.73	4.78
101247389	1.07	0.27	0.19	3.83	3.34	4.77	1.83	1.79	1.76	8.36	5.13	16.92
101247391	0.86	32.92	8.39	0.23	0.18	0.02	1.95	0.18	1.58	0.57	0.16	0.23
101247392	153.22	285.1	321.28	107.33	129.84	100.19	323.43	364.14	302.32	170.14	121.06	177.19
101247398	16.02	8.4	6.1	39.46	35.69	39.68	3.2	4.7	5.43	29.04	26.63	28.8
101247399	3.17	8.44	6.72	1.08	2.93	1.43	7.22	14.2	4	0.82	0.7	1.01
101247401	3.9	1.62	1.4	4.26	4.92	3.3	1.23	2.08	1.83	3.79	2.89	4.35
101247403	797.77	525.75	542.19	306.68	200.98	212.58	812.23	1294.75	618.9	134.27	217.43	171.84
101247407	4.79	2.06	0.56	5.58	6.4	3.25	0.78	0.43	0.78	2.26	1.61	2.59
101247408	9.1	8.43	8.94	10.55	15.96	19.11	6.85	5.81	5.59	11.83	105.75	8.7
101247413	63	44.41	37.83	73.71	81.82	78.49	33.82	42.45	34.15	82.84	75.56	82.59
101247416	55.27	29.61	30.57	110.02	92.75	119.23	30.69	17.64	32.67	52.29	60.96	82.37
101247419	20.68	12.37	14.35	41.24	39.26	56.03	14.75	11.54	16	17.89	25.9	30.35
101247430	6.01	5.14	4.2	9.43	10.31	23.59	2.73	3.42	3.2	14.51	51.29	16.47
101247432	21.79	17.07	15.69	21.81	27.39	25.71	12.98	11.59	16.47	23.18	29.56	20.69
101247434	10.62	16.27	17.18	2.96	3.65	3.36	18.31	18.29	18.89	3.37	3.38	1.75
101247436	4.39	1.71	1.45	4.21	4.38	3.77	1.56	2.11	1.86	2.94	3.74	3.9
101247437	0.12	0.87	0.53	0	0	0	0.57	0.28	1	0.04	0.04	0.04
101247438	1.25	4.66	3.37	0.35	1.24	0.41	3.95	6.17	4.83	0.28	0.03	0.38
101247444	47.9	41.14	38.78	93.8	149.76	154.91	33.67	20.94	44.3	217.62	111.93	275.94
101247446	8.76	2.6	2.09	1.26	1.77	1.04	1.69	2.03	4.26	3.82	1.21	1.26
101247449	38.38	9.6	10.34	25.8	35.52	25.33	5.25	5.22	7.52	22.5	22.5	13.49
101247455	10.85	43.52	42.8	9.3	8.93	8.43	49.72	50.66	40.32	2.3	2.73	3.86
101247458	0	0.05	0	0.1	0.98	0.4	0	0.05	0.02	0.05	0.08	0.08
101247459	11.36	14.67	14.7	7.08	7.08	7.96	20.53	24.03	23.13	4.9	5.55	7.66
101247461	0	0	0	0.81	0.61	0.33	0	0	0	0.6	1.55	0.07
101247471	5.2	3.14	2.77	7.79	11.97	12.43	4.73	8.45	1.03	5.05	4.4	56.52
101247478	0	0	0	7.17	6.64	40.86	0	0	0.06	0	59.19	1.33
101247479	6.33	4.21	4.67	10.73	12.15	10.16	4.36	5.25	4.55	21.33	20.82	19.29
101247482	100.71	81.35	79.73	63.04	31	51.68	118.4	119.81	120.94	21.47	68	31.56
101247486	41.56	41.58	53.6	148.35	220.16	164.52	38.96	30.53	42.53	111.42	109.6	166.1
101247488	112.31	83.71	76.51	217.69	115.23	123.62	58.81	57.98	66.81	61.69	71.21	49.54
101247490	2.39	2.03	2.57	3.02	2.17	3.9	2.65	2.02	1.77	0.28	1.45	0.41
101247492	6.28	1.72	2.25	3.7	3.25	6.23	3.12	1.83	3.26	6	2.85	6.18
101247499	1.49	1.92	4.37	9.89	12.71	7.8	4.19	2.66	1.95	22.49	10.63	60.77
101247502	30.37	17.58	16.54	2.61	1.66	2.99	20.65	27.34	26.29	1.04	1.77	0.74
101247503	14.39	8.99	8.95	53.57	44.51	48.14	10.03	6.48	12.17	80.51	91.73	100.65
101247506	342.93	162.94	202.51	150.31	97.77	90.36	157.72	189.73	205.17	234.6	192.54	199.21
101247512	3.64	3.48	2.85	0.34	0.4	0.16	3.21	4.86	3.29	0.08	0.06	0.08
101247515	11.37	21.66	16.22	11.06	14.42	12.11	19.69	30.78	27.09	3.84	5.19	7.1
101247518	1.2	1.24	0.78	2.1	7.62	1.96	0.39	0.66	0.68	0.4	1.31	1.19
101247519	3.36	7.26	7.44	0.43	1.29	0.48	12.36	22.06	12.39	0.24	0.43	0.61
101247523	4.11	3.22	3.07	5.05	4.89	4.97	2.66	4.03	2.81	8.32	5.31	7.83
101247524	0.89	0.18	0.03	0	0	0	0.05	0.18	0.18	0	0.39	0.03
101247526	10.86	9.63	7.22	1.21	4.22	3.32	11.03	17.71	12.2	2.19	2.52	1.37
101247532	149.69	168.71	236.15	229.53	163.01	238.28	289.17	207.08	208.73	67.99	116.86	107.94
101247537	0	0	0	0.13	0.13	0.63	0	0	0	0	32.42	0.06
101247538	12.16	37.69	31.69	5.13	5.87	5.89	46.14	64.63	48.24	4.01	4.05	5.23
101247539	2.32	4.82	4.84	0.93	1.58	2.15	5.63	6.66	5.72	0.28	1.55	0.25
101247540	2.62	0.91	1.98	0.83	1.2	0.35	1.86	4.37	1.16	362.86	128.11	1.06
101247541	13.6	14.08	13.58	63.05	79.88	53.09	12.05	14.73	11.15	103.43	52.41	127.57
101247545	0.35	0.01	0.05	0.96	0.9	1.11	0.05	0.02	0.04	1.28	0.18	0.64
101247547	6.51	1.93	2.7	7.47	8.75	6.32	4.67	4.74	4.43	12.34	18.74	7.41
101247549	457.06	511.3	529.69	198.17	191.05	170.86	802.21	1072.39	661.49	174.86	205.46	188.95
101247553	40.19	44.99	45.07	26.94	32.03	36.17	52.82	58.88	63.07	26.46	28.68	22.71
101247556	11.83	8.75	8.22	23.56	24.4	28.93	9.39	9.87	9.8	15.17	20.85	18.47
101247557	3839.49	4149.15	3275.21	2507.38	2417.02	133.82	1244.69	660.09	504.56	9442.48	1877.6	3363.78
101247560	0.29	0	0	34.49	32.33	42.03	0.09	0	0.19	0	1363.47	16.93
101247561	1.14	0.8	0.54	2.12	2.28	3.48	0.34	0.8	0.3	4.98	2.32	6.2
101247564	21.12	25.27	24.61	12.2	16.01	14.69	28.92	36.02	27.71	13.26	11.81	12.7
101247573	1.81	2.79	3.31	1.14	2.16	1.07	3.69	3.86	3.18	0.75	1.14	1.18
101247574	298.26	214.31	188.49	167.13	108.04	122.45	277.88	405.84	234.25	87.57	123.53	99.3
101247578	56.86	17.42	18.7	151.64	69.29	159.46	15.28	18	17.49	78.7	69.03	145.96
101247586	56.87	28.23	25.55	72.74	82.6	65.44	19.89	25.9	24.47	69.54	69.32	67.36
101247587	0	0	0	80.96	92.59	319.03	0.14	0.39	0.14	1.53	1151.88	27.82
101247591	3.02	5.2	4.05	1.3	1.27	1.35	4.9	6.96	5.4	1.19	1.74	0.71
101247596	5.18	9.61	8.83	3.34	4.1	2.67	10.26	7.94	9.98	2.23	2.57	2.05
101247598	145.51	87.81	100.42	18.48	3.88	1	71.68	93.76	65.67	282.8	4.64	40.87
101247603	0.99	4.09	0.86	0.57	0.63	0.25	0.92	0.69	0.71	1.38	0.26	0.85
101247605	63.51	43.93	31.48	20.8	20.96	19.78	46.89	73.58	42.63	17.31	25.34	15.08
101247606	0.52	0.15	0.13	0.18	0.17	0.25	0.04	0.11	0.13	0.48	0.17	0.23
101247608	289.93	243.58	214.81	129.93	80.48	79.98	359.33	573.01	235.63	69.1	105.03	90.37
101247609	2.18	1.47	1.74	5.01	3.6	5.39	2.08	3.87	2.7	8.81	4.01	11.05
101247611	26.37	14.17	10.85	40.83	40.2	32.75	10.35	13.39	14.4	41.25	36.57	44.19
101247612	20.14	102.77	88.79	6.19	6.17	2.25	152.85	218.63	146.2	2.07	2.96	4.71
101247619	5.85	1.79	2.25	38.48	31.04	30.6	5.31	2.47	4.17	18.9	17.98	39.01
101247622	5.81	6.22	5.64	8.34	4.93	5.84	5.16	3.77	6.98	18.58	4.45	18.1
101247625	7.55	12.63	10.29	4.94	8.48	9.71	14.09	23.93	15.71	6.6	6.21	5.73
101247627	0.16	0.05	0.16	0.71	2.12	1.33	0.05	0.05	0.05	0.38	0.38	0.49
101247630	6.3	4.51	4.2	6.34	4.37	6.31	6.45	5.65	4.66	0.33	3.13	1.76
101247633	5.35	2.69	1.71	2.56	2.06	2.69	2.92	3.09	4.96	1.19	2.29	1.36
101247637	98.25	0.39	3.22	3.8	3.44	4.85	0.55	0.58	0.49	8.83	4.41	6.64
101247639	1.35	1.61	1.74	0.59	1.48	0.9	2.62	2.85	2.03	0.65	0.56	0.56
101247640	5.06	6.84	5.47	2.21	0.81	2.71	8.73	11.33	8.79	0.37	0.39	1.05
101247643	3.76	2.72	4.99	9.11	9.71	9.44	3.57	2.57	4.88	8.52	8.01	9.8
101247644	0.24	0.32	0.28	2.3	2.65	0.95	0.17	0.43	0.77	1.83	1.4	2.33
101247646	30.54	11.83	10.7	3.82	2.83	3.13	10.24	14.43	13.28	4.44	11.13	1.88
101247648	19.45	16.36	12.64	15.63	16.73	17.37	36.5	19	47.85	17.7	15.08	16.7
101247650	0.49	0.14	0.21	2.82	9.77	6.14	0.02	0.02	0.23	1.4	0.72	1.36
101247653	3.73	1.46	0.84	0.81	0.33	0.89	2.15	2.23	3.6	0.17	0.26	0.22
101247654	0	0	0	0.22	0.04	0.04	0	0.04	0	0.04	5.79	0
101247655	489.7	162.64	254.49	226.98	366.72	145.04	467.15	315.79	441.19	1237.9	372.9	599.87
101247658	12.55	11.25	11.37	5.3	5.07	6.19	11.64	8.05	13.9	6.52	7.02	3.69
101247659	0.77	0.92	0.75	8.2	13.38	6.88	1.31	1.4	2.47	15.47	5.06	13.52
101247661	15.64	17.59	20.2	15.16	13.28	16.62	20.65	21.12	24.17	8.93	13.53	6.87
101247662	36.89	37.36	37.54	22.98	29.26	31.68	50.67	52.38	50.74	16.02	23.67	18
101247663	0.91	0.42	0.25	0.4	0.23	0.43	0.45	0.71	0.4	0.04	0.19	0.08
101247665	278.4	372.79	377.02	141.94	122.68	136.6	630.69	777.1	519.16	98.11	109.3	108.12
101247666	51.21	40.73	41.58	95.72	140.27	94.43	45.1	36.57	43.21	98.28	130.67	109.41
101247667	25.83	19.42	14.65	8.34	9.52	12.03	19.62	16.44	17.67	55.89	19.12	40.24
101247668	0	0	0	0.17	0.21	0.34	0	0.07	0	0	36.62	0.14
101247670	6.32	6.28	4.48	5.8	5.42	7.43	3.77	4.46	3.03	1.04	1.8	0.79
101247678	50.42	59.59	58.01	31.54	35.53	39.66	67.31	81.9	67.75	24.62	28.67	25.68
101247679	30.32	19.71	15.61	31.28	92.51	49.97	9.14	8.73	19.42	24.88	17.74	13.51
101247683	4.91	1.48	1.41	9.88	9.96	4.56	1.21	0.6	2.29	6.1	3.82	3.16
101247687	6.65	5.79	5.92	18.1	22.57	15.56	6.17	4.92	5.96	26.05	9.89	34.76
101247689	10.45	6.49	11.42	61.01	55.98	72.77	7.75	3.64	7.55	13.09	15.28	20.06
101247691	348.94	289.3	343.31	222.78	184.11	168.72	469.22	676.89	397.46	139.96	171.09	159.94
101247695	5.06	7.5	5.87	2.68	2.37	2.94	7.75	11.9	7.34	1.42	1.69	1.87
101247697	27.65	0.02	0	12.69	13	70.29	0	0	0	0.02	282.27	4.14
101247699	9.12	11.29	9.09	5.94	5.84	5.57	10.13	12.04	11.19	3.02	5.84	2.24
101247705	1.53	1.64	0.6	7.53	5.72	5.19	0.82	0.59	0.72	22.45	4.53	33
101247706	21.63	14.89	17.81	41.47	54.61	37.9	12.91	14.84	15.3	55.03	44.26	74.38
101247707	49.03	13.97	15.32	7.68	7.38	8.25	10.62	6.36	12.95	16.28	11.73	33.51
101247708	43.21	81.16	78.21	26.76	38.88	30.57	95.25	103.22	86.77	28.88	26.75	30.24
101247709	0	0	0	0.09	0.17	0.13	0	0	0	0.34	0.17	0.17
101247712	11.23	29.83	29.17	1.22	2.33	1.43	40.01	41.35	41.21	4.65	2.3	2.19
101247714	0.94	0.51	0.35	0.53	0.49	0.81	0.55	0.44	0.66	0.24	0.24	0.2
101247719	8.75	4.69	3.53	11.03	15.23	14.72	3.73	3.66	4.33	10.88	11.16	10.88
101247723	16.96	8.19	12.31	31.75	14.32	57.1	2.22	2.05	3.85	20.46	91.63	48.65
101247726	10.55	7.71	8.03	14.26	20.03	18.12	9.15	7.11	7.07	23.78	23.31	27.83
101247735	44.68	0.11	0.81	10.37	35.71	2.6	0.11	0.04	0.29	0.52	91.8	1.57
101247740	12.46	3.26	2.96	8	6.48	7.31	3.15	3.5	4.2	24.44	10.5	33.43
101247747	162.47	255.01	328.68	269.26	441.55	288.99	170.27	127.68	179.47	330.35	274.93	382.47
101247749	6.41	4.22	2.89	2.01	1.57	2.13	4.36	5.48	5.13	1.04	1.49	1.28
101247754	2.03	0.98	0.68	2.84	4.51	4.05	0.42	0.67	0.38	6.66	1.71	4
101247755	37.43	34.15	25.18	8.14	12.69	7.78	25.61	29.96	23.47	14.06	7.45	7.94
101247757	28.54	25.04	25.8	16.11	12.27	12.53	35.86	53.09	35.46	7.16	10.44	9.31
101247758	7.19	9.83	11.71	3.11	4.47	3.71	10.08	11.81	12.19	5.12	3.77	4.13
101247762	0.91	0.11	0.06	55.42	57.7	391.48	0.04	0.02	0.11	0.11	1133.76	16.35
101247765	1.69	6.39	2.16	0	0	0	11.08	0	21.81	0	0	0
101247768	4.18	2.69	1.41	12.31	17.46	16.78	0.68	0.92	1.49	10.38	6.99	15.53
101247770	10.04	7.77	6.63	17.89	29.54	16.68	14.92	12.29	15.4	58.72	115.59	27.28
101247772	119.28	119.66	116.62	48.89	63.63	54.88	114.98	79.72	141.91	97.47	69.01	39.68
101247777	0.11	0.2	0.07	0.92	0.85	0.52	0.14	0.14	0.17	1.4	0.64	1.27
101247780	0.1	1.16	0.41	0.11	0	0.2	0.75	1.81	1.08	0	0	0
101247786	1.94	1.17	0.65	0	0	0	0	0	0	0	1.91	0
101247787	6.24	3.87	3.57	1.86	2.11	2.25	4.28	6.48	4.29	1.58	2.57	1.84
101247788	57.68	6.61	7.24	20.98	17.74	17.58	5.56	5.1	6.17	14.2	18.22	9.63
101247789	10.5	5.62	3.43	17.46	15.97	17.38	1.5	1.85	1.29	2.44	1.95	4.26
101247790	7.63	5.38	5.69	15.57	20.89	38.05	3.51	2.78	3.43	11.46	96.87	15.16
101247801	483.31	518.5	582.27	233.21	195.54	202.03	810.39	1048.72	684.62	179.09	196.43	180.31
101247803	95.69	100.48	77.86	132.93	194.57	183.66	75.4	84.73	93.45	242.59	242.63	190.08
101247804	5.18	4.01	3.27	1.28	1.64	1.92	3.27	3.12	3.31	12.52	2.91	23.47
101247806	0.92	0.1	0.11	1.43	5.22	0.43	0.07	0.08	0	0	1.74	0
101247807	27.32	27.16	22.11	9.64	15.31	14.08	51.62	44.81	48.57	84.57	17.77	38.69
101247810	0.44	0.36	0.24	0.58	0.98	1.21	0.31	0.22	0.24	0.64	0.33	0.95
101247812	52.49	13.42	11.83	148.47	103.08	89.52	13.84	9.82	10.99	61.48	51.8	156.98
101247814	1.71	0	0	0.92	0.79	0.13	0.13	0	0.51	3.53	0.4	0.78
101247815	4.61	4.05	5.68	1.69	1.96	1.71	3.17	2.82	4.67	2.72	1.68	1.76
101247818	0	0	0.03	0	0	0	0.36	0.35	0.13	0.2	2.81	0.27
101247819	6.02	7.4	5.91	8.57	18.88	12.01	6.55	9.44	7.48	16.16	16.13	17.49
101247820	3.07	7.56	6.18	3.74	3.09	3.14	5.95	7.71	5.15	2.61	1.82	0.78
101247825	0.56	2.29	3.13	13.63	13.84	5.24	0.68	0.85	1.26	2.21	1.12	1.24
101247828	19.97	6.28	4.23	1.01	0.86	1.4	5.07	5.74	6.07	1.33	0.62	3.48
101247830	9.26	0.61	0.33	2.54	6.55	2.43	1.41	2.67	1.39	11.43	26.53	8.06
101247835	34.53	19.64	16.58	35.65	49.61	33.64	19.13	18.48	20.09	33.81	45.21	30.26
101247838	1.75	116.94	2.69	2.75	2.58	2.8	1.03	3.9	1.97	3	9.46	3.81
101247841	9.76	7.52	9.23	41.98	43.26	35.4	6.61	3.69	9.2	40.42	37.46	38.74
101247843	1.87	0.04	0.05	0.01	0	0	0.1	0	0.13	0	0	0
101247847	15.51	16.25	16.25	25.42	32.48	22.43	10.15	13.75	7.79	29.41	14.67	19.69
101247848	10.02	6.92	4.5	2.01	0.76	2	6.15	9.4	7.65	0.27	0.43	0.58
101247849	0.03	0	0	0.62	0.35	0.07	0	0	0	0	1.76	0
101247855	8.57	19.35	23.23	3.1	5.51	5.81	24.35	22.78	17.83	1.92	1.96	2.63
101247857	2780.31	881.53	536.6	2131.64	621.27	28.49	505.69	488.46	268.57	2801.61	576.87	1342.18
101247860	7.37	5.92	3.64	12.44	10.89	11.79	4.04	4.72	4.75	2.51	7.83	1.9
101247863	0.5	0.21	0.21	0.5	0.8	0.5	0.23	0.32	0.18	0.08	0.17	0.15
101247865	1.29	1.14	0.77	6.51	4.34	1.94	0.71	0.65	0.6	78.17	33.45	43.42
101247867	3.31	2.33	1.78	8.33	7.95	8.69	2.26	2.09	2	20.78	6.83	36.76
101247868	1.94	5.76	1.6	0.12	0.13	0.24	10.2	0.32	22.81	0.12	0.07	0
101247870	0.06	1.48	0.87	0.06	0	0	0.7	0.79	0.8	0	0.06	0
101247871	15.36	11.13	9.58	13.77	14.45	15.38	7.36	7.01	8.57	15.92	10.46	16.47
101247873	0.07	0	0.14	0	0	0	0.21	0.07	0	1.69	0	2.11
101247877	1.37	0.36	0.22	0.29	0.25	0.12	0.25	0.4	0.46	0.1	0.06	0.12
101247878	5.04	8.92	9.47	2.86	4.89	5.32	20.01	11.87	15.98	3.65	4.35	6.44
101247880	55.31	7.39	12.48	236.71	285.98	285.89	10.02	7.13	21.89	268.72	201.53	330.5
101247884	3.41	0.17	0.11	0	0.03	0	0	0	0	0	0	0
101247885	12.28	31.68	32.41	5.03	8.85	9.08	30.51	26.03	31.87	3.15	6.96	2.62
101247887	5.54	3.71	2.5	0.93	1.29	0.55	2.34	3.6	2.11	2.39	1.32	1.45
101247888	0.59	0.88	0.54	16.61	18.97	50.15	0.45	0.35	0.31	18.44	109.75	27.8
101247893	3.56	3.58	3.58	2.88	2.68	2.99	2.9	3.62	3.57	0.64	1.77	0.43
101247899	0.25	1.13	1.07	0.17	0	0.04	1.11	1.06	1.52	0.34	0.39	0.17
101247901	11.83	7.57	5.4	4.47	5.93	5.37	9.35	10.45	10.63	3.79	3.63	4
101247902	1.04	0.52	0.45	0.39	1.96	0.3	0.91	0.74	0.71	3.7	1.19	1.19
101247909	25.17	7.49	7	92.15	119.92	71.41	5.3	6.87	6.85	58.31	42.8	97.28
101247910	31.6	10.68	7.38	23.83	24.96	28.04	8.22	8.41	11.75	19.45	17.76	15.68
101247911	3.16	6.59	6.98	11.27	9.74	5.49	6.13	7.87	8.94	3.77	2.3	2.44
101247913	0	0.07	0.11	0.04	0.16	0.19	0.72	1.64	0.79	0.12	0.04	0.08
101247915	146.67	169.81	157.9	48.96	53.63	47.86	101.61	87.57	100.97	58.59	87.78	40.35
101247917	0.45	1.2	0.79	0	0	0.26	2.19	3.41	1.57	0.18	0.18	0
101247918	74.39	83.36	80.68	37.64	45.19	50.33	99.72	115.55	104.06	35.04	41.45	29.51
101247919	0.04	0	0	2.53	3.2	12.69	0.04	0	0	0	45.33	0.86
101247920	3.38	3.04	2.32	3.15	4.75	3.22	3.2	3.76	2.65	11.59	3.26	5.39
101247921	22.02	49.14	57.42	27.71	30.23	37.87	64.48	72.53	36.87	20.57	15.14	23.94
101247922	1.59	3.21	2.33	0.72	0.89	0.97	3.58	4.03	2.82	1.21	0.52	0.58
101247926	9.48	8.04	8.53	24.71	21.53	26.24	8.53	7.12	9.05	20.16	14.61	20.58
101247928	30.42	18.92	15.14	14.81	12.48	13.97	21.69	36.68	22.88	4.68	9.59	6.7
101247929	20.76	45.76	44.93	14.22	18.41	18.29	52.54	55.46	63.02	24.85	16.09	4.62
101247934	53.29	56.55	55.53	25.05	40.57	33.53	62.91	65.79	87.2	28.3	33.64	23.88
101247935	19.64	19.74	14.37	8.68	10.28	7.93	19.75	24.69	19.18	10.19	9.6	8.07
101247949	1.08	5.29	3.18	0.26	0.3	0.55	8.34	4.94	14.23	0.13	0.35	0.04
101247951	6.45	8.51	7.87	10.27	16.03	42.56	9.41	8.93	8.3	7.42	82.16	7.54
101247953	1.13	0.15	0.11	1.64	3.18	3.34	0.39	0.17	0.64	34.86	3.43	8.13
101247958	10.69	9.29	6.2	12.35	14.99	8.92	5.22	7.13	4.68	18.36	7.55	8.76
101247960	14.28	7.96	10.05	3.22	6.64	3.56	6.63	2.47	7.81	11.51	4.2	14.76
101247962	7.95	6.41	5.61	0	0	0	0	0	0.14	0	0	0
101247964	0.51	0.38	0.48	1.62	2.2	0.94	0.29	0.31	0.27	0.41	0.28	0.46
101247970	5.56	3.08	2.16	2.16	2.38	2.6	3.15	5.37	3.35	0.58	1.56	1.02
101247974	11.52	8.78	8.75	13.39	18.09	16.25	8.46	7.07	9.18	25.21	15.01	19.89
101247976	2.02	0.75	0.59	4.74	6.73	5.18	0.75	0.97	1.33	5.82	3.79	3.44
101247977	25.58	21.36	20.89	37.53	45.81	51.85	24.57	26.48	26.82	62.74	64.66	52.7
101247978	7.55	13.83	12.12	5.87	10.7	7.5	12.71	20.55	9.12	7.06	4.19	6.66
101247979	3.34	1.76	1.19	7.46	3.36	3.92	1.49	2.23	1.7	2.06	3.5	3.51
101247980	49.89	22.08	15.36	87.65	81.17	93.06	16.38	15.83	18.6	6.7	54.01	8.56
101247981	0.07	0.03	0.22	0	0.03	0.07	0.35	2.93	0.46	0.27	0.02	0.1
101247982	17.68	14.33	16.52	54.59	42.78	50.3	16.88	14.14	14.14	15.86	24.28	33.22
101247990	0.08	0.22	0.19	0	0	0.04	3.39	7.26	3.92	0.08	0	0.08
101247992	81.77	0.67	0.99	0.51	0.61	0.7	0.69	0.48	0.89	0	92.74	0.2
101247995	4.48	5.17	5.57	7.68	8.94	7.28	3.35	3.72	5.21	10.21	5.19	6.93
101247996	0.68	0.44	0.45	6.13	7.98	4.99	0.71	0.61	1.81	6.6	0.91	6.8
101247997	0	0	0	0	0.09	0.26	0	0	0	0.18	0.36	0.44
101247998	11.8	12.23	12.54	13.87	11.18	16.05	14.49	15.13	14.04	3.96	7.34	5.07
101248000	0.3	0.91	1.81	0.6	1.3	0.73	0.88	1.39	2.99	6.24	1.65	2.98
101248001	0	0.11	0.13	0.31	1.33	1.4	0.02	0	0.07	0	14.52	0.05
101248007	0.07	0.01	0.07	0.3	0.2	0.08	0.01	0.01	0.01	0.06	0.04	0.15
101248009	7.79	1.41	1.03	1.02	1.49	0.76	0.28	0.3	0.32	11.44	1.55	23.36
101248013	4.13	19.55	16.21	13.12	19.62	14.54	6.66	9.33	6.77	2.31	3.03	1.03
101248014	4.07	2.01	2.37	2.28	1.46	1.21	3.97	4.57	2.47	0.14	1.74	0.39
101248016	0.68	2.32	1.34	0.04	0.04	0.07	12.94	13.49	19.25	0.47	0.14	0.36
101248019	0.2	0.09	0.1	0.26	0.25	0.53	0.23	0.15	0.11	1.53	5.68	1.62
101248023	48.38	28.09	22.79	86.65	113.94	79.99	27.17	32	32.33	55.33	56.28	64.08
101248026	4.82	1.08	1.44	46.88	27.8	49.1	1.06	1.24	1.59	67.07	85.65	30.82
101248035	25.01	8.57	5.4	12.09	12.65	13.47	7.36	10.35	8	12.02	22.85	17.59
101248040	5.51	4.01	2.22	0.71	0.58	0.84	4.2	7.71	5.16	0.21	0.34	0.46
101248043	0.43	0.14	0.18	0.05	0.05	0.1	0.28	0.31	0.41	0	0.07	0
101248044	55	63.95	64.22	18.57	25.16	20.03	92.67	116.26	92.11	19.37	17.5	19.67
101248045	3.19	1.76	1.31	1.48	1.29	1.66	1.92	3.04	1.75	0.68	1.17	0.66
101248049	1.87	21.82	22.18	0.35	0.04	0.4	17.02	29.47	18.93	0.13	0.15	0.1
101248050	0.22	0.22	0.09	1.16	0.48	0.22	0.19	0.19	0.37	2.16	0.61	1.57
101248052	110.14	68.06	61.95	210.55	256.49	220.5	49.92	44.52	58.34	175.62	268.04	205.77
101248055	0.06	0	0	0.44	0.12	1.06	0	0	0	0	28.41	0.16
101248056	51.18	43.28	48.26	84.6	81.51	115.16	56.21	46.39	49.63	47.54	63.84	58.48
101248058	1.59	1.96	1.03	8.23	8.55	5.67	1.49	3.16	1.63	7.02	2.48	18.59
101248059	18.78	8.3	7.46	46.61	86.69	56.55	8.31	5	9.45	128.1	40.9	187.64
101248063	0.67	0.53	0.33	2.23	3.91	6.68	0.22	0	0.22	1.99	1.9	1.76
101248067	12.64	5.43	8.62	21.04	84.27	48.43	6.64	4.74	6.15	169.6	31.35	98.62
101248071	11.11	22.54	19.7	7.72	5.84	6.72	20.13	23.69	26.07	4.92	3.22	5.37
101248072	36.6	0.65	0.17	38.39	83.78	17.58	0.17	0	0.08	0.77	42.14	0.34
101248073	8.54	9.4	6.57	7.65	10.05	10.56	6.86	10.56	8.45	46.42	10.54	22.94
101248075	48.2	18.55	16.06	18.45	10.53	12.11	27.54	48.31	25.01	3.02	7.39	4.71
101248077	0.91	1.3	0.81	3.22	3.17	1.84	1.21	1.45	1.53	2.73	3.13	1.99
101248079	197.86	179.06	400.49	368.71	129.66	107.34	175.26	87.19	297.14	12.83	39.15	41.21
101248083	0	0	0	0.3	0.65	0	0	0	0	0.08	6.29	0
101248085	15.17	12.91	9.77	8.61	8.55	8.61	13.47	18.74	14.09	5.83	6.19	5.63
101248087	24.7	20.95	22.67	9.11	2.48	3.12	30.19	33.68	26.52	224.76	1.96	72.04
101248088	3.23	0.25	0.38	0	0	0.15	0.4	0.29	0.43	0.02	0.04	0.02
101248089	0.5	0.11	0.19	0.4	0.62	0.19	0.14	0.19	0.16	1.17	0.31	1.68
101248091	7.65	1.05	0.85	24.6	22.08	15.87	0.44	0.84	0.73	14.65	7.72	15.61
101248092	379.28	537.63	682.8	0.46	0.36	0.15	386.44	1.56	448.82	0.2	0.1	0.3
101248095	0.11	0.06	0.02	0.67	0.93	0.2	0.03	0.07	0.18	0.54	0.2	0.42
101248097	0.06	0.06	0.17	4.18	6.21	0.96	0	0.06	0.06	0.8	0.29	0.63
101248098	197.65	86.29	82.17	388.13	157.76	275	93.19	82.62	75.11	84.99	133	154.29
101248100	0	0	0	0	0	0	0.39	0.24	0.09	0.03	3.24	0.09
101248107	370.22	338.76	318.98	198.71	146.27	178.35	456.44	628.39	431.48	128.75	155.45	135.21
101248108	7.07	3.79	3.85	24.24	34.48	25.5	3.6	2.39	4.27	29.91	31.25	14.33
101248112	311.47	296.26	301.86	123.05	98.91	118.85	549.84	777.96	451.82	112.55	171.28	123.68
101248113	38.59	23.01	22.67	77.34	41.56	64.33	25.08	16.43	20.51	24.01	30.98	42.93
101248114	33.39	30.59	32.32	16.61	18.94	18	47.69	54.82	41.78	7.04	14.54	10.61
101248124	10.82	0.17	0.09	4.49	4.41	2.93	0.17	0	0.34	2.19	11.14	0.96
101248126	31.45	14.83	16.54	39.81	51.35	51.52	11.52	11.52	15.67	47.23	50.8	34.72
101248128	0.04	0	0.08	0.64	1.12	0.08	0	0.04	0.04	0.2	13.63	0.71
101248129	5.11	0.09	0.07	0	0.04	0	0.04	0.02	0	0.04	0.02	0.07
101248130	0.25	2.15	0.61	0	0	0	1.28	0.06	2.78	0	0	0
101248131	19.21	9.91	11.02	13.4	22.29	14.68	9.24	7.22	8.59	19.17	21.5	18.01
101248132	76.96	34.63	26.33	79.2	103.85	74.69	21.86	20.21	24.57	54.34	42.88	70.73
101248133	4.16	6.54	7.15	12.3	18.2	9.41	6.12	4.96	6.64	34.44	11.95	30.51
101248135	71.74	97.77	83.62	11.2	6.69	12.68	131.79	179.94	119.58	4.17	2.14	6.01
101248138	113.45	65.21	102.74	54.79	61.85	23.23	77.24	49.61	28.15	936.68	227.62	440.42
101248139	13.15	3.57	3.73	17.5	14.61	19.78	3.53	3.59	4.53	13.06	10.25	15.79
101248144	4.18	1.88	2.73	3.19	6.63	5.06	1.92	2.53	2.39	3.54	4.08	4.53
101248148	190.28	165.18	162.6	98.17	75.52	94.25	223.24	281.85	189.55	41.96	85.36	48.95
101248149	0.39	1.91	0.82	0	0	0	2.53	0	6.44	0	0	0
101248151	4.12	0.54	0.84	0.13	0.04	0.2	0.42	0.43	0.04	0.05	0.25	0.11
101248153	23.16	16.9	11.71	22.56	31.05	30.77	8.81	9.8	9.6	30.2	28.71	21.05
101248155	0.37	0.45	0.53	0.75	0.98	3.5	0.43	0.36	0.33	0.27	64.37	0.47
101248156	5.02	1.82	1.26	3.92	3.61	4.42	1.14	1.23	1.58	3.39	2.89	3.07
101248157	3.34	3.35	2.42	7.38	4.65	7.86	2.75	4.47	2.74	3.87	3.74	6.84
101248167	16.98	33.62	34.66	14.56	15.31	17.71	35.01	32.41	39.49	11.02	12.95	9.11
101248168	0.25	1.33	1.49	4.44	4.12	18.26	1.55	0.6	1.41	1.32	66.95	2.07
101248180	0.31	0.74	0.39	2.4	2.18	1.94	0.45	0.81	0.55	1.81	0.38	2.43
101248184	10.44	5.91	5.62	23.05	33.91	28.44	5.15	5.46	6.39	40.02	45.7	27.61
101248186	0.37	0.33	0.27	0.77	1.02	0.97	0.24	0.43	0.17	0.67	0.32	0.69
101248187	0.03	0.32	0.15	0.25	0.18	0.03	0.15	0.3	0.18	2.99	0.37	0.18
101248189	24.05	16.11	14.44	28.2	22.25	26.14	17.02	14.89	15.66	59.36	13.8	89.96
101248192	76.43	90.2	75.96	41.8	58.05	43.02	99.43	143.37	90.33	53.58	46.27	44.18
101248193	3.06	1.38	1.31	1.56	3.45	1.87	1.31	1.32	1.65	6.66	8.24	3.04
101248194	66.46	71.56	103.04	172.11	209.86	246.53	98.7	56.58	89.96	106.88	110.55	167.5
101248195	21.6	2.74	1.93	0.05	0.05	0.11	2.01	0.16	1.72	0.05	0.3	0.05
101248196	12.62	5.58	3.99	5.55	6.56	6.78	3.87	4.71	5.85	12.25	6.04	15.78
101248202	12.32	1.68	4.69	7.34	12.36	10.56	2.87	1.3	2.56	3.5	10.03	4.65
101248208	180.1	70.14	61.82	97.57	106.09	111.82	69.85	82.5	67.75	132.74	121.38	189.94
101248209	28.3	43.71	59.02	7.72	7.06	8.31	95.15	126.93	66.4	0.84	2.55	2.64
101248210	15.02	14.45	10.88	21.53	26.74	23.05	7.95	7.25	9.07	169.31	18.23	94.94
101248211	1.24	0.93	0.99	0.19	0.18	0.14	0.99	1.02	1.03	0.09	0.14	0
101248212	2.79	1.11	1.01	3.49	4.31	2.83	1.42	0.71	1.15	4.24	8.02	13.36
101248215	0.5	0	0	0	0	0	0	0	0	0	3.43	0
101248216	4.5	5.54	6.24	2.58	1.44	2.95	7.78	6.62	7.84	0.14	1.15	0.43
101248221	0.48	1.49	1.28	0.21	0.27	0.29	2.06	2.64	2.95	0.25	0.25	0.2
101248222	5.69	8.54	8.14	6.47	11.15	14.22	6.12	1.82	7.74	11.73	9.61	13.53
101248223	1.13	0.51	0.33	3.44	3.7	2.1	0.48	0.8	0.47	4.07	1.17	2.81
101248225	0.72	10.53	3.91	0.18	0.09	0.09	0.18	0	0	0.09	0.09	0.36
101248226	20.16	8.7	8.11	15.55	13.98	16.11	6.42	5.77	7.63	10.77	20.79	11.91
101248229	8.18	5.42	5.45	11.35	14.91	15.49	5.17	5.6	6.36	12.02	17.37	14.36
101248230	4.84	3.74	3.85	11.16	8.25	9.55	4.03	4.12	4.38	10.76	8.2	18.16
101248231	3.85	1.07	0.14	0.07	0.07	0	0.14	0	0	0.21	0.07	0
101248236	22.76	22.9	20.67	4.64	1.56	1.26	15.18	5.62	21.91	13.67	18.17	6.31
101248237	4.21	172.43	443.42	1.79	0.99	0.97	2.37	0.51	2.96	15.04	1.53	0.89
101248238	33.4	40.3	37.79	17.94	20.56	24.47	49.55	63.54	48.46	19.76	20.18	16.17
101248240	1.16	0.23	0.48	0.18	0.37	0.24	0	0	0	0	42.58	0
101248242	153.2	151.9	233	120.39	229.26	49.3	229.73	216.82	306.57	624.91	424.35	378.26
101248251	682.39	817.72	766.5	385.43	270.61	294.48	1103	1326.09	977.48	311.58	314.33	312.07
101248252	7.04	8.04	7.21	8.69	10.13	15.02	6.23	4.57	6.19	18.31	8.28	15.14
101248253	0.21	0.86	0.36	0.05	0	0	2.75	4.31	1.64	0	0	0.05
101248254	679.57	253.25	363.71	755.23	569.13	805.68	231.88	131.65	363.4	1045.15	891.62	277.36
101248255	9.86	1.09	2.15	54.72	27.6	34.22	2.48	0.54	4.11	26.4	13.27	66.46
101248258	1.05	0.26	0.15	3.65	3.21	3.44	0.39	0.43	0.29	2.66	3.23	4.28
101248261	4.83	2.32	1.31	9.27	10.44	9.43	1.17	1.79	2.1	9.06	8.02	10.22
101248262	1.78	2.86	3.14	1.45	1.24	1.91	2.31	2.12	3.02	0.96	1.1	0.86
101248263	27.93	18.05	17.4	41.65	43.43	53.31	17	16.14	19.08	22.8	50.24	36.69
101248264	0.23	0.33	0.21	0	0.1	0.02	0.46	0.67	0.7	0.1	0.08	0.06
101248265	0	0	0	0	0.21	0.27	0	0	0	0	3.42	0.07
101248269	0.74	0.22	0.17	1.15	1.24	1.1	0.19	0.31	0.39	1.42	0.69	2.44
101248270	14.13	5.52	4.49	20.24	16.37	18.6	3.97	4.44	5.81	16.79	11	21.05
101248276	4.49	18.54	21.49	9.85	51.08	7.66	4.37	5.59	8.46	31.52	12.82	31.84
101248277	32.33	32.27	27.44	26.87	13.62	29.03	43.94	44.91	36.6	3.34	17.46	4.22
101248282	0.17	0.24	0.07	2.3	1.99	14.27	0.78	0.12	1.63	0.02	25.61	0.77
101248283	6.44	8.4	11.43	1.88	1.8	1.52	13.17	9.23	14.16	5.18	1.97	4.21
101248294	1.53	0.99	0.93	4.21	3.79	3.44	1.5	3.59	1.05	1.03	1.04	1.71
101248296	10.93	1.85	2.39	9.95	13.42	10.82	1.73	1.36	1.8	35.46	12.6	37.82
101248299	29.6	38.87	36.59	22.01	31.34	25.67	45.31	50.57	45.73	16.39	20.26	15.51
101248301	20.43	90.05	52.07	63.88	102.95	12.67	134.2	115.34	87.75	48.39	22.9	10.37
101248302	835.98	866.05	896.19	436.81	433.97	385.45	991.21	1257.5	845.62	323.14	313.34	314.8
101248303	4.13	3.53	2.31	1.54	1.07	2.34	3.51	4.71	3.08	1.22	0.87	1.36
101248304	6.69	1.41	0.72	2.29	6.94	1.95	2.02	2.45	2.21	4.17	14.78	2.41
101248316	35.49	26.47	21.89	33.04	40.2	27.52	20.64	23.69	20.93	41.96	52.22	42.33
101248317	5.3	0	0	0.44	0.39	1.85	0.02	0.02	0.02	0	6.01	0.12
101248318	7.49	5.56	4.01	2.11	2.28	4.7	4.23	1.94	3.09	7.17	10.92	3.22
101248330	6.65	2.5	4.14	24.58	15.46	31.17	5	2.94	3.71	7.78	16.38	12.83
101248335	0.5	0	0.39	2.89	3.6	6.65	0.29	0.38	0	0.4	2	1.28
101248337	10.77	14.95	18.51	45.16	20.67	39.83	15.5	13.14	16.96	0.54	20.9	1.81
101248338	0.22	0.21	0.09	0	0	0.03	0.19	0.18	0.68	0	0.06	0
101248341	80.64	58.33	66.77	141.94	155.64	144.65	71.86	56	56.1	105.1	115.22	120.06
101248342	0	0	0	0.06	0.02	0.28	0	0	0	0.03	1.41	0
101248343	3.44	1.84	0.81	16.17	19.35	83.53	13.5	1.21	13.49	0.08	284.02	4.61
101248344	7.13	3.48	3.17	7.33	10.16	7.27	3.53	2.81	4.28	25.02	10.38	11.38
101248347	27.83	20.29	14.94	10.64	8.02	10.39	21.66	31.36	20.15	4.26	8.23	3.88
101248353	0.83	0.09	0.05	1.12	3.17	5.33	0.07	0.09	0.11	0.51	2.66	0.28
101248357	1.68	1.46	0.91	0.61	2.6	1.29	0.71	0.64	0.56	1.18	0.48	1.67
101248358	12.1	15.42	11.11	4.27	4.23	4.44	14.33	25.44	17.47	1.83	2.13	2.59
101248360	1.97	2.37	2.44	25.09	40.28	35.59	1.92	2.59	2.43	25.36	22.52	45.58
101248365	0	0	0	1.69	1.28	5.42	0	0	0	0	37.13	0.47
101248367	888.37	1180.58	1321.27	1975.12	2631.85	2471.2	835.02	646.18	1133.26	35.54	1660.38	17.59
101248373	5.78	2.49	2.02	0.86	0.6	0.9	2.52	4.18	3.09	15	0.73	10.61
101248374	4.68	1.6	1.31	6.94	7.88	8.01	1.84	2.12	1.69	15.5	9.43	30.49
101248375	0.89	0.74	0.26	0.41	0.42	0.21	0.79	0.89	1.63	0.17	0.22	0.33
101248377	15.69	18.2	31.85	4.9	6.01	5.63	17.1	16.05	16.72	7.89	5.77	6.95
101248383	1.16	0.15	0.06	0.48	0.46	2.06	0.04	0.09	0.06	0	6.27	0.12
101248385	17.92	12.09	11.49	50.61	54.52	60.15	11.98	11.45	13.09	55.77	46.13	63.51
101248386	13.2	4.53	3.01	2.29	2.51	1.74	3.95	4.2	4.3	0.62	4.69	1.02
101248387	2.49	2.77	2.95	9.25	2.09	2.45	4.06	2.95	2.83	0.31	1.57	0.41
101248389	25.91	19.56	17.15	16.76	14.77	15.58	23.49	31.86	23.84	12.11	12.57	10.14
101248400	1.8	1.05	0.41	1.87	2.33	2.51	0.69	0.83	1.28	3.34	5.5	4
101248404	119.25	123.36	116.23	44.77	53.97	39.4	121.69	147.59	124.05	124.86	115.22	51.28
101248406	0.14	224.02	0.13	0	0	0	1.6	0.06	0.07	0	0.21	0
101248407	44.36	59.07	66.98	145.16	113.16	145.13	43.77	53.45	51.61	66.89	90.89	127.82
101248409	32.57	19.43	14.32	27.94	34.4	20.12	18.35	19.49	19.22	22.16	74.49	21.14
101248412	15.86	0	0.04	0	0.12	0.04	0	0	0	0.04	0	0.04
101248413	0.19	0.46	0.56	0	0.1	0.09	5.25	6.53	2.19	1	0.65	1.65
101248416	0.56	2.61	1.5	0	0	0	5.13	0	7.89	0	0	0
[truncated: 8,597 more rows]
