# Supplementary material for: Transcriptome Analysis of Flower Development and Mining of Genes Related to Flowering Time in Tomato (Solanum lycopersicum)
Source: Int J Mol Sci. 2021 Jul 29;22(15):8128. doi: 10.3390/ijms22158128 (PMC8347202; doi:10.3390/ijms22158128)
Supplement: Supplementary file 1 [file ijms-22-08128-s001.zip › Table S2.xls]

## Sheet: Table S2A
Table S2A GO_biological processes enrichment information sheet.
GO_P Term ID	GO_P Term Desc	GO_P Term Level1	GO_P Term Level2	Term Candidate Gene Num	Total Candidate Gene Num	Term Gene Num	Total Gene Num	Rich Ratio	P value	Q value
GO:0006412	translation	biological_process	cellular process	210	6349	289	14485	0.726644	1.10871e-23	2.84052e-20
GO:0006270	DNA replication initiation	biological_process	cellular process	18	6349	18	14485	1	3.51784e-07	0.000450636
GO:0002181	cytoplasmic translation	biological_process	cellular process	27	6349	33	14485	0.818182	8.64248e-06	0.00738068
GO:0000278	mitotic cell cycle	biological_process	cellular process	45	6349	64	14485	0.703125	1.60856e-05	0.00824224
GO:0007018	microtubule-based movement	biological_process	cellular process	44	6349	62	14485	0.709677	1.36679e-05	0.00824224
GO:0006260	DNA replication	biological_process	cellular process	34	6349	46	14485	0.73913	3.33309e-05	0.0142323
GO:0006414	translational elongation	biological_process	cellular process	15	6349	16	14485	0.9375	3.95785e-05	0.0142887
GO:0045787	positive regulation of cell cycle	biological_process	biological regulation	26	6349	33	14485	0.787879	4.46175e-05	0.0142887
GO:0009607	response to biotic stimulus	biological_process	response to stimulus	37	6349	52	14485	0.711538	6.0362e-05	0.0171831
GO:0006952	defense response	biological_process	response to stimulus	282	6349	550	14485	0.512727	0.000208834	0.0535033
GO:0000470	maturation of LSU-rRNA	biological_process	cellular component organization or biogenesis	10	6349	10	14485	1	0.000260698	0.0560465
GO:0003333	amino acid transmembrane transport	biological_process	localization	34	6349	49	14485	0.693878	0.000262513	0.0560465
GO:0009734	auxin-activated signaling pathway	biological_process	biological regulation	147	6349	271	14485	0.542435	0.000324552	0.0593929
GO:0010083	regulation of vegetative meristem growth	biological_process	biological regulation	18	6349	22	14485	0.818182	0.000304795	0.0593929
GO:0007049	cell cycle	biological_process	cellular process	76	6349	129	14485	0.589147	0.000384164	0.0615143
GO:0009744	response to sucrose	biological_process	response to stimulus	43	6349	66	14485	0.651515	0.000381505	0.0615143
GO:0007088	regulation of mitotic nuclear division	biological_process	biological regulation	22	6349	29	14485	0.758621	0.000462672	0.0697274
GO:0051301	cell division	biological_process	cellular process	119	6349	216	14485	0.550926	0.000525	0.074725
GO:0009611	response to wounding	biological_process	response to stimulus	108	6349	194	14485	0.556701	0.000560997	0.0756461
GO:0009690	cytokinin metabolic process	biological_process	biological regulation	27	6349	38	14485	0.710526	0.000626306	0.0764093
GO:0045490	pectin catabolic process	biological_process	metabolic process	64	6349	107	14485	0.598131	0.000613679	0.0764093
GO:0009926	auxin polar transport	biological_process	biological regulation	33	6349	49	14485	0.673469	0.000750439	0.0873921
GO:0048316	seed development	biological_process	developmental process	48	6349	77	14485	0.623377	0.000802888	0.0894347
GO:0055114	oxidation-reduction process	biological_process	metabolic process	154	6349	290	14485	0.531034	0.000840206	0.089692
GO:0048439	flower morphogenesis	biological_process	developmental process	22	6349	30	14485	0.733333	0.00101687	0.104208
GO:0000027	ribosomal large subunit assembly	biological_process	cellular component organization or biogenesis	19	6349	25	14485	0.76	0.00110675	0.109057
GO:0001732	formation of cytoplasmic translation initiation complex	biological_process	cellular component organization or biogenesis	14	6349	17	14485	0.823529	0.00135668	0.128734
GO:0009773	photosynthetic electron transport in photosystem I	biological_process	cellular process	12	6349	14	14485	0.857143	0.00161943	0.147631
GO:0045926	negative regulation of growth	biological_process	biological regulation	21	6349	29	14485	0.724138	0.0017287	0.147631
GO:0071244	cellular response to carbon dioxide	biological_process	cellular process	10	6349	11	14485	0.909091	0.00172601	0.147631
GO:0009641	shade avoidance	biological_process	response to stimulus	16	6349	21	14485	0.761905	0.00267482	0.220789
GO:0080110	sporopollenin biosynthetic process	biological_process	cellular component organization or biogenesis	7	6349	7	14485	1	0.00310242	0.220789
GO:0090307	mitotic spindle assembly	biological_process	cellular component organization or biogenesis	7	6349	7	14485	1	0.00310242	0.220789
GO:0098869	cellular oxidant detoxification	biological_process	cellular process	20	6349	28	14485	0.714286	0.00290607	0.220789
GO:1904668	positive regulation of ubiquitin protein ligase activity	biological_process	biological regulation	7	6349	7	14485	1	0.00310242	0.220789
GO:2000030	regulation of response to red or far red light	biological_process	biological regulation	7	6349	7	14485	1	0.00310242	0.220789
GO:0000462	maturation of SSU-rRNA from tricistronic rRNA transcript (SSU-rRNA, 5.8S rRNA, LSU-rRNA)	biological_process	cellular component organization or biogenesis	14	6349	18	14485	0.777778	0.00363494	0.245071
GO:0048658	anther wall tapetum development	biological_process	developmental process	9	6349	10	14485	0.9	0.00360619	0.245071
GO:0000079	regulation of cyclin-dependent protein serine/threonine kinase activity	biological_process	biological regulation	28	6349	43	14485	0.651163	0.00395066	0.246868
GO:0006633	fatty acid biosynthetic process	biological_process	cellular process	51	6349	87	14485	0.586207	0.00380716	0.246868
GO:0051260	protein homooligomerization	biological_process	cellular component organization or biogenesis	22	6349	32	14485	0.6875	0.00386615	0.246868
GO:0010015	root morphogenesis	biological_process	developmental process	23	6349	34	14485	0.676471	0.00433016	0.257997
GO:0016042	lipid catabolic process	biological_process	metabolic process	91	6349	168	14485	0.541667	0.00431457	0.257997
GO:0000028	ribosomal small subunit assembly	biological_process	cellular process	15	6349	20	14485	0.75	0.0047284	0.273163
GO:0006364	rRNA processing	biological_process	metabolic process	45	6349	76	14485	0.592105	0.00490457	0.273163
GO:0009851	auxin biosynthetic process	biological_process	biological regulation	12	6349	15	14485	0.8	0.00485158	0.273163
GO:0005975	carbohydrate metabolic process	biological_process	metabolic process	158	6349	310	14485	0.509677	0.00632567	0.329884
GO:0006109	regulation of carbohydrate metabolic process	biological_process	biological regulation	6	6349	6	14485	1	0.00708181	0.329884
GO:0008283	cell proliferation	biological_process	cell proliferation	21	6349	31	14485	0.677419	0.00619113	0.329884
GO:0008284	positive regulation of cell proliferation	biological_process	cell proliferation	28	6349	44	14485	0.636364	0.00635802	0.329884
GO:0010555	response to mannitol	biological_process	response to stimulus	6	6349	6	14485	1	0.00708181	0.329884
GO:0032465	regulation of cytokinesis	biological_process	biological regulation	6	6349	6	14485	1	0.00708181	0.329884
GO:0042545	cell wall modification	biological_process	cellular component organization or biogenesis	42	6349	71	14485	0.591549	0.00659692	0.329884
GO:0060236	regulation of mitotic spindle organization	biological_process	biological regulation	6	6349	6	14485	1	0.00708181	0.329884
GO:0071028	nuclear mRNA surveillance	biological_process	biological regulation	6	6349	6	14485	1	0.00708181	0.329884
GO:0000226	microtubule cytoskeleton organization	biological_process	cellular component organization or biogenesis	23	6349	35	14485	0.657143	0.00742808	0.335711
GO:0009831	plant-type cell wall modification involved in multidimensional cell growth	biological_process	cellular component organization or biogenesis	8	6349	9	14485	0.888889	0.00746899	0.335711
GO:0016099	monoterpenoid biosynthetic process	biological_process	cellular process	14	6349	19	14485	0.736842	0.00824518	0.352069
GO:0048527	lateral root development	biological_process	developmental process	24	6349	37	14485	0.648649	0.00799106	0.352069
GO:0055085	transmembrane transport	biological_process	localization	74	6349	136	14485	0.544118	0.0081559	0.352069
GO:0010252	auxin homeostasis	biological_process	biological regulation	21	6349	32	14485	0.65625	0.0106297	0.446449
GO:0006468	protein phosphorylation	biological_process	cellular process	207	6349	419	14485	0.494033	0.0114131	0.454642
GO:0006636	unsaturated fatty acid biosynthetic process	biological_process	cellular process	12	6349	16	14485	0.75	0.0116641	0.454642
GO:0009934	regulation of meristem structural organization	biological_process	biological regulation	9	6349	11	14485	0.818182	0.012067	0.454642
GO:0010951	negative regulation of endopeptidase activity	biological_process	biological regulation	9	6349	11	14485	0.818182	0.012067	0.454642
GO:0032875	regulation of DNA endoreduplication	biological_process	biological regulation	12	6349	16	14485	0.75	0.0116641	0.454642
GO:0035336	long-chain fatty-acyl-CoA metabolic process	biological_process	metabolic process	9	6349	11	14485	0.818182	0.012067	0.454642
GO:1902456	regulation of stomatal opening	biological_process	cellular process	9	6349	11	14485	0.818182	0.012067	0.454642
GO:0000467	exonucleolytic trimming to generate mature 3'-end of 5.8S rRNA from tricistronic rRNA transcript (SSU-rRNA, 5.8S rRNA, LSU-rRNA)	biological_process	cellular component organization or biogenesis	5	6349	5	14485	1	0.016164	0.476003
GO:0006261	DNA-dependent DNA replication	biological_process	metabolic process	13	6349	18	14485	0.722222	0.0141615	0.476003
GO:0006598	polyamine catabolic process	biological_process	cellular process	5	6349	5	14485	1	0.016164	0.476003
GO:0006662	glycerol ether metabolic process	biological_process	metabolic process	18	6349	27	14485	0.666667	0.0140867	0.476003
GO:0007112	male meiosis cytokinesis	biological_process	cellular process	5	6349	5	14485	1	0.016164	0.476003
GO:0007142	male meiosis II	biological_process	cellular component organization or biogenesis	5	6349	5	14485	1	0.016164	0.476003
GO:0009623	response to parasitic fungus	biological_process	multi-organism process	5	6349	5	14485	1	0.016164	0.476003
GO:0009955	adaxial/abaxial pattern specification	biological_process	developmental process	5	6349	5	14485	1	0.016164	0.476003
GO:0010430	fatty acid omega-oxidation	biological_process	cellular process	5	6349	5	14485	1	0.016164	0.476003
GO:0010466	negative regulation of peptidase activity	biological_process	biological regulation	5	6349	5	14485	1	0.016164	0.476003
GO:0010584	pollen exine formation	biological_process	cellular component organization or biogenesis	18	6349	27	14485	0.666667	0.0140867	0.476003
GO:0015969	guanosine tetraphosphate metabolic process	biological_process	metabolic process	5	6349	5	14485	1	0.016164	0.476003
GO:0019310	inositol catabolic process	biological_process	cellular process	5	6349	5	14485	1	0.016164	0.476003
GO:0019919	peptidyl-arginine methylation, to asymmetrical-dimethyl arginine	biological_process	cellular process	5	6349	5	14485	1	0.016164	0.476003
GO:0031145	anaphase-promoting complex-dependent catabolic process	biological_process	cellular process	5	6349	5	14485	1	0.016164	0.476003
GO:0033314	mitotic DNA replication checkpoint	biological_process	regulation of biological process	5	6349	5	14485	1	0.016164	0.476003
GO:0035017	cuticle pattern formation	biological_process	developmental process	5	6349	5	14485	1	0.016164	0.476003
GO:0051415	microtubule nucleation by interphase microtubule organizing center	biological_process	cellular component organization or biogenesis	5	6349	5	14485	1	0.016164	0.476003
GO:1901957	regulation of cutin biosynthetic process	biological_process	biological regulation	5	6349	5	14485	1	0.016164	0.476003
GO:0006863	purine nucleobase transport	biological_process	localization	14	6349	20	14485	0.7	0.016451	0.478948
GO:0031347	regulation of defense response	biological_process	biological regulation	24	6349	39	14485	0.615385	0.019566	0.563236
GO:0051321	meiotic cell cycle	biological_process	cellular process	25	6349	41	14485	0.609756	0.020154	0.573719
GO:0080167	response to karrikin	biological_process	response to stimulus	51	6349	93	14485	0.548387	0.0209897	0.590941
GO:0000741	karyogamy	biological_process	cellular component organization or biogenesis	8	6349	10	14485	0.8	0.0229202	0.611682
GO:0007623	circadian rhythm	biological_process	rhythmic process	44	6349	79	14485	0.556962	0.0222249	0.611682
GO:0009684	indoleacetic acid biosynthetic process	biological_process	biological regulation	8	6349	10	14485	0.8	0.0229202	0.611682
GO:0009789	positive regulation of abscisic acid-activated signaling pathway	biological_process	cellular process	33	6349	57	14485	0.578947	0.0226066	0.611682
GO:0032147	activation of protein kinase activity	biological_process	cellular process	33	6349	57	14485	0.578947	0.0226066	0.611682
GO:0006457	protein folding	biological_process	cellular process	54	6349	100	14485	0.54	0.025685	0.678401
GO:0005983	starch catabolic process	biological_process	cellular process	9	6349	12	14485	0.75	0.029501	0.689694
GO:0006334	nucleosome assembly	biological_process	cellular process	25	6349	42	14485	0.595238	0.0293739	0.689694
GO:0009610	response to symbiotic fungus	biological_process	multi-organism process	6	6349	7	14485	0.857143	0.0309582	0.689694
GO:0009643	photosynthetic acclimation	biological_process	response to stimulus	6	6349	7	14485	0.857143	0.0309582	0.689694
GO:0009933	meristem structural organization	biological_process	developmental process	9	6349	12	14485	0.75	0.029501	0.689694
GO:0010315	auxin efflux	biological_process	biological regulation	13	6349	19	14485	0.684211	0.0269802	0.689694
GO:0015770	sucrose transport	biological_process	localization	9	6349	12	14485	0.75	0.029501	0.689694
GO:0019253	reductive pentose-phosphate cycle	biological_process	cellular process	14	6349	21	14485	0.666667	0.0296282	0.689694
GO:0030261	chromosome condensation	biological_process	cellular component organization or biogenesis	6	6349	7	14485	0.857143	0.0309582	0.689694
GO:0034427	nuclear-transcribed mRNA catabolic process, exonucleolytic, 3'-5'	biological_process	biological regulation	6	6349	7	14485	0.857143	0.0309582	0.689694
GO:0034475	U4 snRNA 3'-end processing	biological_process	cellular process	6	6349	7	14485	0.857143	0.0309582	0.689694
GO:0034969	histone arginine methylation	biological_process	cellular component organization or biogenesis	6	6349	7	14485	0.857143	0.0309582	0.689694
GO:0042128	nitrate assimilation	biological_process	cellular process	22	6349	36	14485	0.611111	0.0275979	0.689694
GO:0051017	actin filament bundle assembly	biological_process	cellular component organization or biogenesis	14	6349	21	14485	0.666667	0.0296282	0.689694
GO:0051096	positive regulation of helicase activity	biological_process	biological regulation	6	6349	7	14485	0.857143	0.0309582	0.689694
GO:1902457	negative regulation of stomatal opening	biological_process	biological regulation	6	6349	7	14485	0.857143	0.0309582	0.689694
GO:2000022	regulation of jasmonic acid mediated signaling pathway	biological_process	response to stimulus	23	6349	38	14485	0.605263	0.0282957	0.689694
GO:2000038	regulation of stomatal complex development	biological_process	biological regulation	9	6349	12	14485	0.75	0.029501	0.689694
GO:0000076	DNA replication checkpoint	biological_process	cellular process	4	6349	4	14485	1	0.0368907	0.700103
GO:0000082	G1/S transition of mitotic cell cycle	biological_process	cellular process	4	6349	4	14485	1	0.0368907	0.700103
GO:0006885	regulation of pH	biological_process	biological regulation	15	6349	23	14485	0.652174	0.0319004	0.700103
GO:0009263	deoxyribonucleotide biosynthetic process	biological_process	cellular process	4	6349	4	14485	1	0.0368907	0.700103
GO:0009299	mRNA transcription	biological_process	cellular process	10	6349	14	14485	0.714286	0.0350367	0.700103
GO:0009555	pollen development	biological_process	multicellular organismal process	75	6349	145	14485	0.517241	0.0332219	0.700103
GO:0010600	regulation of auxin biosynthetic process	biological_process	biological regulation	4	6349	4	14485	1	0.0368907	0.700103
GO:0015696	ammonium transport	biological_process	localization	4	6349	4	14485	1	0.0368907	0.700103
GO:0015749	monosaccharide transmembrane transport	biological_process	localization	4	6349	4	14485	1	0.0368907	0.700103
GO:0016554	cytidine to uridine editing	biological_process	cellular process	18	6349	29	14485	0.62069	0.0368608	0.700103
GO:0019856	pyrimidine nucleobase biosynthetic process	biological_process	cellular process	4	6349	4	14485	1	0.0368907	0.700103
GO:0019877	diaminopimelate biosynthetic process	biological_process	cellular process	4	6349	4	14485	1	0.0368907	0.700103
GO:0043086	negative regulation of catalytic activity	biological_process	biological regulation	17	6349	27	14485	0.62963	0.0354795	0.700103
GO:0044210	'de novo' CTP biosynthetic process	biological_process	cellular process	4	6349	4	14485	1	0.0368907	0.700103
GO:0045739	positive regulation of DNA repair	biological_process	biological regulation	4	6349	4	14485	1	0.0368907	0.700103
GO:0046203	spermidine catabolic process	biological_process	cellular process	4	6349	4	14485	1	0.0368907	0.700103
GO:0051592	response to calcium ion	biological_process	response to stimulus	4	6349	4	14485	1	0.0368907	0.700103
GO:0055047	generative cell mitosis	biological_process	cellular component organization or biogenesis	4	6349	4	14485	1	0.0368907	0.700103
GO:0070979	protein K11-linked ubiquitination	biological_process	cellular process	4	6349	4	14485	1	0.0368907	0.700103
GO:0080005	photosystem stoichiometry adjustment	biological_process	biological regulation	4	6349	4	14485	1	0.0368907	0.700103
GO:0009627	systemic acquired resistance	biological_process	immune system process	20	6349	33	14485	0.606061	0.038965	0.730532
GO:0010374	stomatal complex development	biological_process	developmental process	11	6349	16	14485	0.6875	0.0396346	0.730532
GO:0016998	cell wall macromolecule catabolic process	biological_process	cellular process	11	6349	16	14485	0.6875	0.0396346	0.730532
GO:0019748	secondary metabolic process	biological_process	metabolic process	11	6349	16	14485	0.6875	0.0396346	0.730532
GO:0000724	double-strand break repair via homologous recombination	biological_process	cellular process	30	6349	53	14485	0.566038	0.0415622	0.760589
GO:0007267	cell-cell signaling	biological_process	signaling	12	6349	18	14485	0.666667	0.0434259	0.762035
GO:0010026	trichome differentiation	biological_process	cellular process	12	6349	18	14485	0.666667	0.0434259	0.762035
GO:0035435	phosphate ion transmembrane transport	biological_process	localization	7	6349	9	14485	0.777778	0.0427373	0.762035
GO:0048830	adventitious root development	biological_process	developmental process	7	6349	9	14485	0.777778	0.0427373	0.762035
GO:0052544	defense response by callose deposition in cell wall	biological_process	cellular component organization or biogenesis	12	6349	18	14485	0.666667	0.0434259	0.762035
GO:1905582	response to mannose	biological_process	response to stimulus	7	6349	9	14485	0.777778	0.0427373	0.762035
GO:0009737	response to abscisic acid	biological_process	response to stimulus	187	6349	388	14485	0.481959	0.044448	0.774666
GO:0009416	response to light stimulus	biological_process	response to stimulus	66	6349	128	14485	0.515625	0.0468125	0.804924
GO:0010197	polar nucleus fusion	biological_process	cellular component organization or biogenesis	13	6349	20	14485	0.65	0.0465345	0.804924
GO:0009807	lignan biosynthetic process	biological_process	cellular process	8	6349	11	14485	0.727273	0.051862	0.874148
GO:0051276	chromosome organization	biological_process	cellular component organization or biogenesis	8	6349	11	14485	0.727273	0.051862	0.874148
GO:0090698	post-embryonic plant morphogenesis	biological_process	developmental process	8	6349	11	14485	0.727273	0.051862	0.874148
GO:0000012	single strand break repair	biological_process	cellular process	2	6349	3	14485	0.666667	0.407936	0.878702
GO:0000024	maltose biosynthetic process	biological_process	cellular process	3	6349	3	14485	1	0.084187	0.878702
GO:0000041	transition metal ion transport	biological_process	localization	1	6349	1	14485	1	0.438315	0.878702
GO:0000050	urea cycle	biological_process	cellular process	1	6349	1	14485	1	0.438315	0.878702
GO:0000053	argininosuccinate metabolic process	biological_process	cellular process	1	6349	1	14485	1	0.438315	0.878702
GO:0000056	ribosomal small subunit export from nucleus	biological_process	localization	3	6349	4	14485	0.75	0.226076	0.878702
GO:0000070	mitotic sister chromatid segregation	biological_process	cellular component organization or biogenesis	6	6349	10	14485	0.6	0.237199	0.878702
GO:0000086	G2/M transition of mitotic cell cycle	biological_process	cellular process	2	6349	3	14485	0.666667	0.407936	0.878702
GO:0000132	establishment of mitotic spindle orientation	biological_process	cellular component organization or biogenesis	1	6349	1	14485	1	0.438315	0.878702
GO:0000162	tryptophan biosynthetic process	biological_process	cellular process	10	6349	19	14485	0.526316	0.292081	0.878702
GO:0000187	activation of MAPK activity	biological_process	biological regulation	6	6349	12	14485	0.5	0.440037	0.878702
GO:0000212	meiotic spindle organization	biological_process	cellular process	3	6349	4	14485	0.75	0.226076	0.878702
GO:0000256	allantoin catabolic process	biological_process	cellular process	2	6349	3	14485	0.666667	0.407936	0.878702
GO:0000272	polysaccharide catabolic process	biological_process	metabolic process	21	6349	36	14485	0.583333	0.0567398	0.878702
GO:0000280	nuclear division	biological_process	cellular component organization or biogenesis	3	6349	4	14485	0.75	0.226076	0.878702
GO:0000281	mitotic cytokinesis	biological_process	cellular process	4	6349	6	14485	0.666667	0.236241	0.878702
GO:0000302	response to reactive oxygen species	biological_process	response to stimulus	15	6349	30	14485	0.5	0.307785	0.878702
GO:0000354	cis assembly of pre-catalytic spliceosome	biological_process	cellular component organization or biogenesis	2	6349	2	14485	1	0.192104	0.878702
GO:0000372	Group I intron splicing	biological_process	cellular process	1	6349	1	14485	1	0.438315	0.878702
GO:0000379	tRNA-type intron splice site recognition and cleavage	biological_process	metabolic process	1	6349	1	14485	1	0.438315	0.878702
GO:0000381	regulation of alternative mRNA splicing, via spliceosome	biological_process	biological regulation	15	6349	29	14485	0.517241	0.250363	0.878702
GO:0000387	spliceosomal snRNP assembly	biological_process	cellular component organization or biogenesis	10	6349	17	14485	0.588235	0.158209	0.878702
GO:0000395	mRNA 5'-splice site recognition	biological_process	cellular component organization or biogenesis	5	6349	8	14485	0.625	0.238458	0.878702
GO:0000447	endonucleolytic cleavage in ITS1 to separate SSU-rRNA from 5.8S rRNA and LSU-rRNA from tricistronic rRNA transcript (SSU-rRNA, 5.8S rRNA, LSU-rRNA)	biological_process	cellular component organization or biogenesis	7	6349	10	14485	0.7	0.0889772	0.878702
GO:0000448	cleavage in ITS2 between 5.8S rRNA and LSU-rRNA of tricistronic rRNA transcript (SSU-rRNA, 5.8S rRNA, LSU-rRNA)	biological_process	cellular component organization or biogenesis	1	6349	1	14485	1	0.438315	0.878702
GO:0000454	snoRNA guided rRNA pseudouridine synthesis	biological_process	cellular component organization or biogenesis	1	6349	1	14485	1	0.438315	0.878702
GO:0000461	endonucleolytic cleavage to generate mature 3'-end of SSU-rRNA from (SSU-rRNA, 5.8S rRNA, LSU-rRNA)	biological_process	cellular component organization or biogenesis	3	6349	3	14485	1	0.084187	0.878702
GO:0000463	maturation of LSU-rRNA from tricistronic rRNA transcript (SSU-rRNA, 5.8S rRNA, LSU-rRNA)	biological_process	cellular component organization or biogenesis	11	6349	18	14485	0.611111	0.107778	0.878702
GO:0000466	maturation of 5.8S rRNA from tricistronic rRNA transcript (SSU-rRNA, 5.8S rRNA, LSU-rRNA)	biological_process	cellular process	5	6349	9	14485	0.555556	0.351197	0.878702
GO:0000472	endonucleolytic cleavage to generate mature 5'-end of SSU-rRNA from (SSU-rRNA, 5.8S rRNA, LSU-rRNA)	biological_process	cellular component organization or biogenesis	4	6349	6	14485	0.666667	0.236241	0.878702
GO:0000480	endonucleolytic cleavage in 5'-ETS of tricistronic rRNA transcript (SSU-rRNA, 5.8S rRNA, LSU-rRNA)	biological_process	cellular component organization or biogenesis	4	6349	6	14485	0.666667	0.236241	0.878702
GO:0000492	box C/D snoRNP assembly	biological_process	cellular component organization or biogenesis	2	6349	3	14485	0.666667	0.407936	0.878702
GO:0000493	box H/ACA snoRNP assembly	biological_process	cellular component organization or biogenesis	1	6349	1	14485	1	0.438315	0.878702
GO:0000494	box C/D snoRNA 3'-end processing	biological_process	metabolic process	1	6349	1	14485	1	0.438315	0.878702
GO:0000495	box H/ACA snoRNA 3'-end processing	biological_process	cellular process	1	6349	1	14485	1	0.438315	0.878702
GO:0000710	meiotic mismatch repair	biological_process	metabolic process	2	6349	3	14485	0.666667	0.407936	0.878702
GO:0000712	resolution of meiotic recombination intermediates	biological_process	cellular component organization or biogenesis	7	6349	11	14485	0.636364	0.153929	0.878702
GO:0000720	pyrimidine dimer repair by nucleotide-excision repair	biological_process	cellular process	4	6349	5	14485	0.8	0.119797	0.878702
GO:0000722	telomere maintenance via recombination	biological_process	biological regulation	3	6349	5	14485	0.6	0.385494	0.878702
GO:0000727	double-strand break repair via break-induced replication	biological_process	metabolic process	3	6349	3	14485	1	0.084187	0.878702
GO:0000730	DNA recombinase assembly	biological_process	cellular component organization or biogenesis	2	6349	3	14485	0.666667	0.407936	0.878702
GO:0000731	DNA synthesis involved in DNA repair	biological_process	metabolic process	2	6349	3	14485	0.666667	0.407936	0.878702
GO:0000735	removal of nonhomologous ends	biological_process	cellular process	1	6349	1	14485	1	0.438315	0.878702
GO:0000902	cell morphogenesis	biological_process	cellular process	12	6349	24	14485	0.5	0.341038	0.878702
GO:0000904	cell morphogenesis involved in differentiation	biological_process	cellular component organization or biogenesis	1	6349	1	14485	1	0.438315	0.878702
GO:0000911	cytokinesis by cell plate formation	biological_process	cellular process	16	6349	31	14485	0.516129	0.243264	0.878702
GO:0000913	preprophase band assembly	biological_process	cellular component organization or biogenesis	2	6349	3	14485	0.666667	0.407936	0.878702
GO:0000914	phragmoplast assembly	biological_process	cellular component organization or biogenesis	1	6349	1	14485	1	0.438315	0.878702
GO:0000919	cell plate assembly	biological_process	cellular component organization or biogenesis	3	6349	5	14485	0.6	0.385494	0.878702
GO:0000920	septum digestion after cytokinesis	biological_process	cellular process	1	6349	1	14485	1	0.438315	0.878702
GO:0000973	posttranscriptional tethering of RNA polymerase II gene DNA at nuclear periphery	biological_process	cellular process	4	6349	6	14485	0.666667	0.236241	0.878702
GO:0001193	maintenance of transcriptional fidelity during DNA-templated transcription elongation from RNA polymerase II promoter	biological_process	cellular process	1	6349	1	14485	1	0.438315	0.878702
GO:0001561	fatty acid alpha-oxidation	biological_process	cellular process	2	6349	2	14485	1	0.192104	0.878702
GO:0001678	cellular glucose homeostasis	biological_process	biological regulation	4	6349	6	14485	0.666667	0.236241	0.878702
GO:0001709	cell fate determination	biological_process	cellular process	5	6349	8	14485	0.625	0.238458	0.878702
GO:0001927	exocyst assembly	biological_process	cellular component organization or biogenesis	2	6349	3	14485	0.666667	0.407936	0.878702
GO:0002103	endonucleolytic cleavage of tetracistronic rRNA transcript (SSU-rRNA, LSU-rRNA, 4.5S-rRNA, 5S-rRNA)	biological_process	metabolic process	2	6349	2	14485	1	0.192104	0.878702
GO:0002128	tRNA nucleoside ribose methylation	biological_process	cellular process	1	6349	1	14485	1	0.438315	0.878702
GO:0002182	cytoplasmic translational elongation	biological_process	cellular process	1	6349	1	14485	1	0.438315	0.878702
GO:0002191	cap-dependent translational initiation	biological_process	cellular process	1	6349	1	14485	1	0.438315	0.878702
GO:0002221	pattern recognition receptor signaling pathway	biological_process	biological regulation	6	6349	11	14485	0.545455	0.337124	0.878702
GO:0002229	defense response to oomycetes	biological_process	multi-organism process	24	6349	46	14485	0.521739	0.160254	0.878702
GO:0002238	response to molecule of fungal origin	biological_process	multi-organism process	11	6349	20	14485	0.55	0.216472	0.878702
GO:0002239	response to oomycetes	biological_process	response to stimulus	8	6349	14	14485	0.571429	0.230305	0.878702
GO:0002253	activation of immune response	biological_process	biological regulation	8	6349	15	14485	0.533333	0.312796	0.878702
GO:0002679	respiratory burst involved in defense response	biological_process	immune system process	2	6349	2	14485	1	0.192104	0.878702
GO:0002926	tRNA wobble base 5-methoxycarbonylmethyl-2-thiouridinylation	biological_process	cellular process	1	6349	1	14485	1	0.438315	0.878702
GO:0002933	lipid hydroxylation	biological_process	cellular process	1	6349	1	14485	1	0.438315	0.878702
GO:0003006	developmental process involved in reproduction	biological_process	developmental process	2	6349	3	14485	0.666667	0.407936	0.878702
GO:0005986	sucrose biosynthetic process	biological_process	cellular process	5	6349	7	14485	0.714286	0.138118	0.878702
GO:0005987	sucrose catabolic process	biological_process	cellular process	4	6349	7	14485	0.571429	0.367073	0.878702
GO:0005992	trehalose biosynthetic process	biological_process	metabolic process	8	6349	14	14485	0.571429	0.230305	0.878702
GO:0005996	monosaccharide metabolic process	biological_process	metabolic process	1	6349	1	14485	1	0.438315	0.878702
GO:0006000	fructose metabolic process	biological_process	metabolic process	4	6349	7	14485	0.571429	0.367073	0.878702
GO:0006002	fructose 6-phosphate metabolic process	biological_process	cellular process	7	6349	13	14485	0.538462	0.324417	0.878702
GO:0006003	fructose 2,6-bisphosphate metabolic process	biological_process	cellular process	1	6349	1	14485	1	0.438315	0.878702
GO:0006021	inositol biosynthetic process	biological_process	cellular process	5	6349	8	14485	0.625	0.238458	0.878702
GO:0006032	chitin catabolic process	biological_process	cellular process	14	6349	25	14485	0.56	0.152611	0.878702
GO:0006066	alcohol metabolic process	biological_process	metabolic process	1	6349	1	14485	1	0.438315	0.878702
GO:0006071	glycerol metabolic process	biological_process	cellular process	11	6349	20	14485	0.55	0.216472	0.878702
GO:0006073	cellular glucan metabolic process	biological_process	cellular process	7	6349	11	14485	0.636364	0.153929	0.878702
GO:0006083	acetate metabolic process	biological_process	cellular process	3	6349	4	14485	0.75	0.226076	0.878702
GO:0006090	pyruvate metabolic process	biological_process	cellular process	2	6349	2	14485	1	0.192104	0.878702
GO:0006094	gluconeogenesis	biological_process	metabolic process	12	6349	19	14485	0.631579	0.0716184	0.878702
GO:0006107	oxaloacetate metabolic process	biological_process	cellular process	3	6349	5	14485	0.6	0.385494	0.878702
GO:0006110	regulation of glycolytic process	biological_process	biological regulation	1	6349	1	14485	1	0.438315	0.878702
GO:0006114	glycerol biosynthetic process	biological_process	cellular process	1	6349	1	14485	1	0.438315	0.878702
GO:0006139	nucleobase-containing compound metabolic process	biological_process	cellular process	2	6349	3	14485	0.666667	0.407936	0.878702
GO:0006144	purine nucleobase metabolic process	biological_process	cellular process	2	6349	3	14485	0.666667	0.407936	0.878702
GO:0006145	purine nucleobase catabolic process	biological_process	cellular process	2	6349	3	14485	0.666667	0.407936	0.878702
GO:0006164	purine nucleotide biosynthetic process	biological_process	cellular process	4	6349	7	14485	0.571429	0.367073	0.878702
GO:0006206	pyrimidine nucleobase metabolic process	biological_process	metabolic process	1	6349	1	14485	1	0.438315	0.878702
GO:0006207	'de novo' pyrimidine nucleobase biosynthetic process	biological_process	cellular process	5	6349	9	14485	0.555556	0.351197	0.878702
GO:0006213	pyrimidine nucleoside metabolic process	biological_process	cellular process	1	6349	1	14485	1	0.438315	0.878702
GO:0006216	cytidine catabolic process	biological_process	metabolic process	1	6349	1	14485	1	0.438315	0.878702
GO:0006227	dUDP biosynthetic process	biological_process	metabolic process	1	6349	1	14485	1	0.438315	0.878702
GO:0006231	dTMP biosynthetic process	biological_process	cellular process	2	6349	2	14485	1	0.192104	0.878702
GO:0006233	dTDP biosynthetic process	biological_process	cellular process	1	6349	1	14485	1	0.438315	0.878702
GO:0006235	dTTP biosynthetic process	biological_process	cellular process	3	6349	3	14485	1	0.084187	0.878702
GO:0006240	dCDP biosynthetic process	biological_process	cellular process	2	6349	2	14485	1	0.192104	0.878702
GO:0006241	CTP biosynthetic process	biological_process	cellular process	6	6349	10	14485	0.6	0.237199	0.878702
GO:0006259	DNA metabolic process	biological_process	cellular process	5	6349	6	14485	0.833333	0.0615752	0.878702
GO:0006265	DNA topological change	biological_process	cellular component organization or biogenesis	6	6349	12	14485	0.5	0.440037	0.878702
GO:0006267	pre-replicative complex assembly involved in nuclear cell cycle DNA replication	biological_process	cellular component organization or biogenesis	2	6349	2	14485	1	0.192104	0.878702
GO:0006268	DNA unwinding involved in DNA replication	biological_process	cellular component organization or biogenesis	6	6349	8	14485	0.75	0.0779135	0.878702
GO:0006269	DNA replication, synthesis of RNA primer	biological_process	cellular process	1	6349	1	14485	1	0.438315	0.878702
GO:0006272	leading strand elongation	biological_process	cellular process	3	6349	3	14485	1	0.084187	0.878702
GO:0006273	lagging strand elongation	biological_process	cellular process	2	6349	3	14485	0.666667	0.407936	0.878702
GO:0006275	regulation of DNA replication	biological_process	cellular process	3	6349	4	14485	0.75	0.226076	0.878702
GO:0006282	regulation of DNA repair	biological_process	cellular process	7	6349	11	14485	0.636364	0.153929	0.878702
GO:0006283	transcription-coupled nucleotide-excision repair	biological_process	cellular process	2	6349	3	14485	0.666667	0.407936	0.878702
GO:0006284	base-excision repair	biological_process	metabolic process	10	6349	20	14485	0.5	0.367691	0.878702
GO:0006285	base-excision repair, AP site formation	biological_process	metabolic process	2	6349	3	14485	0.666667	0.407936	0.878702
GO:0006287	base-excision repair, gap-filling	biological_process	cellular process	2	6349	2	14485	1	0.192104	0.878702
GO:0006289	nucleotide-excision repair	biological_process	cellular process	15	6349	27	14485	0.555556	0.150458	0.878702
GO:0006290	pyrimidine dimer repair	biological_process	cellular process	3	6349	3	14485	1	0.084187	0.878702
GO:0006297	nucleotide-excision repair, DNA gap filling	biological_process	cellular process	2	6349	3	14485	0.666667	0.407936	0.878702
GO:0006298	mismatch repair	biological_process	cellular process	11	6349	18	14485	0.611111	0.107778	0.878702
GO:0006302	double-strand break repair	biological_process	cellular process	11	6349	21	14485	0.52381	0.282741	0.878702
GO:0006303	double-strand break repair via nonhomologous end joining	biological_process	cellular process	7	6349	12	14485	0.583333	0.234211	0.878702
GO:0006308	DNA catabolic process	biological_process	cellular process	2	6349	3	14485	0.666667	0.407936	0.878702
GO:0006312	mitotic recombination	biological_process	cellular process	7	6349	11	14485	0.636364	0.153929	0.878702
GO:0006344	maintenance of chromatin silencing	biological_process	biological regulation	3	6349	4	14485	0.75	0.226076	0.878702
GO:0006346	methylation-dependent chromatin silencing	biological_process	biological regulation	5	6349	7	14485	0.714286	0.138118	0.878702
GO:0006348	chromatin silencing at telomere	biological_process	cellular component organization or biogenesis	1	6349	1	14485	1	0.438315	0.878702
GO:0006349	regulation of gene expression by genetic imprinting	biological_process	biological regulation	5	6349	7	14485	0.714286	0.138118	0.878702
GO:0006351	transcription, DNA-templated	biological_process	cellular process	40	6349	83	14485	0.481928	0.243793	0.878702
GO:0006354	DNA-templated transcription, elongation	biological_process	cellular process	2	6349	2	14485	1	0.192104	0.878702
GO:0006355	regulation of transcription, DNA-templated	biological_process	biological regulation	372	6349	810	14485	0.459259	0.115184	0.878702
GO:0006360	transcription by RNA polymerase I	biological_process	cellular process	9	6349	14	14485	0.642857	0.101831	0.878702
GO:0006361	transcription initiation from RNA polymerase I promoter	biological_process	metabolic process	3	6349	4	14485	0.75	0.226076	0.878702
GO:0006379	mRNA cleavage	biological_process	cellular process	2	6349	3	14485	0.666667	0.407936	0.878702
GO:0006383	transcription by RNA polymerase III	biological_process	cellular process	7	6349	13	14485	0.538462	0.324417	0.878702
GO:0006386	termination of RNA polymerase III transcription	biological_process	cellular process	3	6349	3	14485	1	0.084187	0.878702
GO:0006390	mitochondrial transcription	biological_process	cellular process	1	6349	1	14485	1	0.438315	0.878702
GO:0006398	mRNA 3'-end processing by stem-loop binding and cleavage	biological_process	cellular process	1	6349	1	14485	1	0.438315	0.878702
GO:0006413	translational initiation	biological_process	cellular process	13	6349	22	14485	0.590909	0.11003	0.878702
GO:0006422	aspartyl-tRNA aminoacylation	biological_process	cellular process	1	6349	1	14485	1	0.438315	0.878702
GO:0006433	prolyl-tRNA aminoacylation	biological_process	cellular process	2	6349	3	14485	0.666667	0.407936	0.878702
GO:0006434	seryl-tRNA aminoacylation	biological_process	cellular process	2	6349	2	14485	1	0.192104	0.878702
GO:0006437	tyrosyl-tRNA aminoacylation	biological_process	metabolic process	1	6349	1	14485	1	0.438315	0.878702
GO:0006452	translational frameshifting	biological_process	metabolic process	3	6349	5	14485	0.6	0.385494	0.878702
GO:0006458	'de novo' protein folding	biological_process	cellular process	4	6349	5	14485	0.8	0.119797	0.878702
GO:0006479	protein methylation	biological_process	cellular process	3	6349	4	14485	0.75	0.226076	0.878702
GO:0006508	proteolysis	biological_process	metabolic process	57	6349	126	14485	0.452381	0.407979	0.878702
GO:0006520	cellular amino acid metabolic process	biological_process	cellular process	14	6349	28	14485	0.5	0.318138	0.878702
GO:0006527	arginine catabolic process	biological_process	cellular process	2	6349	3	14485	0.666667	0.407936	0.878702
GO:0006538	glutamate catabolic process	biological_process	cellular process	3	6349	5	14485	0.6	0.385494	0.878702
GO:0006541	glutamine metabolic process	biological_process	cellular process	14	6349	23	14485	0.608696	0.0757746	0.878702
GO:0006545	glycine biosynthetic process	biological_process	biological regulation	1	6349	1	14485	1	0.438315	0.878702
GO:0006546	glycine catabolic process	biological_process	biological regulation	2	6349	2	14485	1	0.192104	0.878702
GO:0006557	S-adenosylmethioninamine biosynthetic process	biological_process	cellular process	3	6349	5	14485	0.6	0.385494	0.878702
GO:0006558	L-phenylalanine metabolic process	biological_process	cellular process	1	6349	1	14485	1	0.438315	0.878702
GO:0006560	proline metabolic process	biological_process	cellular process	2	6349	2	14485	1	0.192104	0.878702
GO:0006562	proline catabolic process	biological_process	cellular process	2	6349	2	14485	1	0.192104	0.878702
GO:0006564	L-serine biosynthetic process	biological_process	metabolic process	3	6349	5	14485	0.6	0.385494	0.878702
GO:0006567	threonine catabolic process	biological_process	metabolic process	3	6349	4	14485	0.75	0.226076	0.878702
GO:0006568	tryptophan metabolic process	biological_process	cellular process	1	6349	1	14485	1	0.438315	0.878702
GO:0006569	tryptophan catabolic process	biological_process	cellular process	1	6349	1	14485	1	0.438315	0.878702
GO:0006570	tyrosine metabolic process	biological_process	cellular process	2	6349	2	14485	1	0.192104	0.878702
GO:0006595	polyamine metabolic process	biological_process	cellular process	1	6349	1	14485	1	0.438315	0.878702
GO:0006596	polyamine biosynthetic process	biological_process	cellular process	6	6349	10	14485	0.6	0.237199	0.878702
GO:0006597	spermine biosynthetic process	biological_process	cellular process	4	6349	6	14485	0.666667	0.236241	0.878702
GO:0006606	protein import into nucleus	biological_process	localization	20	6349	34	14485	0.588235	0.0563741	0.878702
GO:0006611	protein export from nucleus	biological_process	localization	3	6349	4	14485	0.75	0.226076	0.878702
GO:0006629	lipid metabolic process	biological_process	metabolic process	51	6349	98	14485	0.520408	0.0620944	0.878702
GO:0006641	triglyceride metabolic process	biological_process	cellular process	3	6349	3	14485	1	0.084187	0.878702
GO:0006644	phospholipid metabolic process	biological_process	cellular process	7	6349	13	14485	0.538462	0.324417	0.878702
GO:0006680	glucosylceramide catabolic process	biological_process	cellular process	3	6349	3	14485	1	0.084187	0.878702
GO:0006694	steroid biosynthetic process	biological_process	metabolic process	7	6349	11	14485	0.636364	0.153929	0.878702
GO:0006696	ergosterol biosynthetic process	biological_process	cellular process	5	6349	8	14485	0.625	0.238458	0.878702
GO:0006725	cellular aromatic compound metabolic process	biological_process	cellular process	2	6349	2	14485	1	0.192104	0.878702
GO:0006729	tetrahydrobiopterin biosynthetic process	biological_process	cellular process	2	6349	3	14485	0.666667	0.407936	0.878702
GO:0006734	NADH metabolic process	biological_process	cellular process	3	6349	5	14485	0.6	0.385494	0.878702
GO:0006742	NADP catabolic process	biological_process	cellular process	1	6349	1	14485	1	0.438315	0.878702
GO:0006749	glutathione metabolic process	biological_process	cellular process	14	6349	27	14485	0.518519	0.257819	0.878702
GO:0006751	glutathione catabolic process	biological_process	cellular process	3	6349	5	14485	0.6	0.385494	0.878702
GO:0006780	uroporphyrinogen III biosynthetic process	biological_process	metabolic process	1	6349	1	14485	1	0.438315	0.878702
GO:0006782	protoporphyrinogen IX biosynthetic process	biological_process	cellular process	7	6349	11	14485	0.636364	0.153929	0.878702
GO:0006783	heme biosynthetic process	biological_process	cellular process	5	6349	9	14485	0.555556	0.351197	0.878702
GO:0006784	heme a biosynthetic process	biological_process	cellular process	1	6349	1	14485	1	0.438315	0.878702
GO:0006792	regulation of sulfur utilization	biological_process	biological regulation	2	6349	2	14485	1	0.192104	0.878702
GO:0006793	phosphorus metabolic process	biological_process	metabolic process	2	6349	2	14485	1	0.192104	0.878702
GO:0006805	xenobiotic metabolic process	biological_process	cellular process	1	6349	1	14485	1	0.438315	0.878702
GO:0006813	potassium ion transport	biological_process	localization	27	6349	51	14485	0.529412	0.120864	0.878702
GO:0006817	phosphate ion transport	biological_process	localization	11	6349	17	14485	0.647059	0.0684515	0.878702
GO:0006820	anion transport	biological_process	localization	3	6349	5	14485	0.6	0.385494	0.878702
GO:0006824	cobalt ion transport	biological_process	localization	1	6349	1	14485	1	0.438315	0.878702
GO:0006828	manganese ion transport	biological_process	localization	1	6349	1	14485	1	0.438315	0.878702
GO:0006844	acyl carnitine transport	biological_process	localization	2	6349	2	14485	1	0.192104	0.878702
GO:0006855	drug transmembrane transport	biological_process	localization	34	6349	64	14485	0.53125	0.0849508	0.878702
GO:0006857	oligopeptide transport	biological_process	localization	3	6349	5	14485	0.6	0.385494	0.878702
GO:0006865	amino acid transport	biological_process	localization	6	6349	10	14485	0.6	0.237199	0.878702
GO:0006869	lipid transport	biological_process	localization	36	6349	73	14485	0.493151	0.203376	0.878702
GO:0006874	cellular calcium ion homeostasis	biological_process	biological regulation	7	6349	14	14485	0.5	0.418529	0.878702
GO:0006898	receptor-mediated endocytosis	biological_process	localization	9	6349	17	14485	0.529412	0.302064	0.878702
GO:0006900	vesicle budding from membrane	biological_process	cellular component organization or biogenesis	10	6349	16	14485	0.625	0.10541	0.878702
GO:0006913	nucleocytoplasmic transport	biological_process	localization	5	6349	8	14485	0.625	0.238458	0.878702
GO:0006955	immune response	biological_process	immune system process	6	6349	12	14485	0.5	0.440037	0.878702
GO:0006968	cellular defense response	biological_process	response to stimulus	1	6349	1	14485	1	0.438315	0.878702
GO:0006995	cellular response to nitrogen starvation	biological_process	cellular process	9	6349	16	14485	0.5625	0.225905	0.878702
GO:0006998	nuclear envelope organization	biological_process	cellular component organization or biogenesis	1	6349	1	14485	1	0.438315	0.878702
GO:0006999	nuclear pore organization	biological_process	cellular component organization or biogenesis	3	6349	3	14485	1	0.084187	0.878702
GO:0007006	mitochondrial membrane organization	biological_process	cellular process	2	6349	2	14485	1	0.192104	0.878702
GO:0007017	microtubule-based process	biological_process	cellular process	20	6349	36	14485	0.555556	0.105818	0.878702
GO:0007019	microtubule depolymerization	biological_process	cellular process	4	6349	7	14485	0.571429	0.367073	0.878702
GO:0007020	microtubule nucleation	biological_process	cellular component organization or biogenesis	5	6349	6	14485	0.833333	0.0615752	0.878702
GO:0007023	post-chaperonin tubulin folding pathway	biological_process	cellular process	2	6349	3	14485	0.666667	0.407936	0.878702
GO:0007052	mitotic spindle organization	biological_process	cellular component organization or biogenesis	7	6349	11	14485	0.636364	0.153929	0.878702
GO:0007065	male meiosis sister chromatid cohesion	biological_process	cellular component organization or biogenesis	1	6349	1	14485	1	0.438315	0.878702
GO:0007066	female meiosis sister chromatid cohesion	biological_process	cellular component organization or biogenesis	1	6349	1	14485	1	0.438315	0.878702
GO:0007076	mitotic chromosome condensation	biological_process	cellular component organization or biogenesis	5	6349	7	14485	0.714286	0.138118	0.878702
GO:0007091	metaphase/anaphase transition of mitotic cell cycle	biological_process	biological regulation	1	6349	1	14485	1	0.438315	0.878702
GO:0007093	mitotic cell cycle checkpoint	biological_process	biological regulation	2	6349	2	14485	1	0.192104	0.878702
GO:0007094	mitotic spindle assembly checkpoint	biological_process	biological regulation	5	6349	9	14485	0.555556	0.351197	0.878702
GO:0007095	mitotic G2 DNA damage checkpoint	biological_process	biological regulation	2	6349	3	14485	0.666667	0.407936	0.878702
GO:0007131	reciprocal meiotic recombination	biological_process	cellular component organization or biogenesis	17	6349	35	14485	0.485714	0.344418	0.878702
GO:0007140	male meiotic nuclear division	biological_process	cellular component organization or biogenesis	6	6349	8	14485	0.75	0.0779135	0.878702
GO:0007143	female meiotic nuclear division	biological_process	cellular component organization or biogenesis	3	6349	4	14485	0.75	0.226076	0.878702
GO:0007154	cell communication	biological_process	cellular process	1	6349	1	14485	1	0.438315	0.878702
GO:0007163	establishment or maintenance of cell polarity	biological_process	cellular process	2	6349	3	14485	0.666667	0.407936	0.878702
GO:0007164	establishment of tissue polarity	biological_process	developmental process	2	6349	2	14485	1	0.192104	0.878702
GO:0007165	signal transduction	biological_process	cellular process	52	6349	113	14485	0.460177	0.352673	0.878702
GO:0007178	transmembrane receptor protein serine/threonine kinase signaling pathway	biological_process	cellular process	2	6349	3	14485	0.666667	0.407936	0.878702
GO:0007205	protein kinase C-activating G protein-coupled receptor signaling pathway	biological_process	biological regulation	5	6349	8	14485	0.625	0.238458	0.878702
GO:0007276	gamete generation	biological_process	multicellular organismal process	2	6349	2	14485	1	0.192104	0.878702
GO:0007346	regulation of mitotic cell cycle	biological_process	biological regulation	3	6349	4	14485	0.75	0.226076	0.878702
GO:0007349	cellularization	biological_process	developmental process	1	6349	1	14485	1	0.438315	0.878702
GO:0007584	response to nutrient	biological_process	response to stimulus	2	6349	2	14485	1	0.192104	0.878702
GO:0008152	metabolic process	biological_process	metabolic process	31	6349	59	14485	0.525424	0.111605	0.878702
GO:0008153	para-aminobenzoic acid biosynthetic process	biological_process	cellular process	1	6349	1	14485	1	0.438315	0.878702
GO:0008219	cell death	biological_process	cellular process	13	6349	26	14485	0.5	0.329188	0.878702
GO:0008285	negative regulation of cell proliferation	biological_process	biological regulation	14	6349	25	14485	0.56	0.152611	0.878702
GO:0008295	spermidine biosynthetic process	biological_process	metabolic process	6	6349	10	14485	0.6	0.237199	0.878702
GO:0008299	isoprenoid biosynthetic process	biological_process	cellular process	11	6349	22	14485	0.5	0.353817	0.878702
GO:0008356	asymmetric cell division	biological_process	cellular process	8	6349	16	14485	0.5	0.399686	0.878702
GO:0008535	respiratory chain complex IV assembly	biological_process	cellular component organization or biogenesis	1	6349	1	14485	1	0.438315	0.878702
GO:0008645	hexose transmembrane transport	biological_process	localization	1	6349	1	14485	1	0.438315	0.878702
GO:0009051	pentose-phosphate shunt, oxidative branch	biological_process	cellular process	2	6349	3	14485	0.666667	0.407936	0.878702
GO:0009072	aromatic amino acid family metabolic process	biological_process	cellular process	2	6349	3	14485	0.666667	0.407936	0.878702
GO:0009073	aromatic amino acid family biosynthetic process	biological_process	cellular process	8	6349	16	14485	0.5	0.399686	0.878702
GO:0009083	branched-chain amino acid catabolic process	biological_process	metabolic process	3	6349	5	14485	0.6	0.385494	0.878702
GO:0009095	aromatic amino acid family biosynthetic process, prephenate pathway	biological_process	cellular process	1	6349	1	14485	1	0.438315	0.878702
GO:0009117	nucleotide metabolic process	biological_process	cellular process	1	6349	1	14485	1	0.438315	0.878702
GO:0009143	nucleoside triphosphate catabolic process	biological_process	cellular process	2	6349	2	14485	1	0.192104	0.878702
GO:0009156	ribonucleoside monophosphate biosynthetic process	biological_process	cellular process	2	6349	3	14485	0.666667	0.407936	0.878702
GO:0009166	nucleotide catabolic process	biological_process	cellular process	1	6349	1	14485	1	0.438315	0.878702
GO:0009202	deoxyribonucleoside triphosphate biosynthetic process	biological_process	cellular process	1	6349	1	14485	1	0.438315	0.878702
GO:0009204	deoxyribonucleoside triphosphate catabolic process	biological_process	cellular process	1	6349	1	14485	1	0.438315	0.878702
GO:0009220	pyrimidine ribonucleotide biosynthetic process	biological_process	cellular process	1	6349	1	14485	1	0.438315	0.878702
GO:0009231	riboflavin biosynthetic process	biological_process	cellular process	8	6349	15	14485	0.533333	0.312796	0.878702
GO:0009259	ribonucleotide metabolic process	biological_process	cellular process	1	6349	1	14485	1	0.438315	0.878702
GO:0009260	ribonucleotide biosynthetic process	biological_process	cellular process	2	6349	2	14485	1	0.192104	0.878702
GO:0009266	response to temperature stimulus	biological_process	response to stimulus	7	6349	12	14485	0.583333	0.234211	0.878702
GO:0009268	response to pH	biological_process	response to stimulus	1	6349	1	14485	1	0.438315	0.878702
GO:0009308	amine metabolic process	biological_process	metabolic process	4	6349	7	14485	0.571429	0.367073	0.878702
GO:0009398	FMN biosynthetic process	biological_process	cellular process	2	6349	2	14485	1	0.192104	0.878702
GO:0009407	toxin catabolic process	biological_process	cellular process	7	6349	12	14485	0.583333	0.234211	0.878702
GO:0009409	response to cold	biological_process	response to stimulus	121	6349	251	14485	0.482072	0.0895485	0.878702
GO:0009411	response to UV	biological_process	response to stimulus	9	6349	17	14485	0.529412	0.302064	0.878702
GO:0009414	response to water deprivation	biological_process	response to stimulus	115	6349	255	14485	0.45098	0.363284	0.878702
GO:0009415	response to water	biological_process	response to stimulus	3	6349	4	14485	0.75	0.226076	0.878702
GO:0009435	NAD biosynthetic process	biological_process	cellular process	4	6349	7	14485	0.571429	0.367073	0.878702
GO:0009439	cyanate metabolic process	biological_process	cellular process	1	6349	1	14485	1	0.438315	0.878702
GO:0009451	RNA modification	biological_process	cellular process	105	6349	215	14485	0.488372	0.077969	0.878702
GO:0009553	embryo sac development	biological_process	multicellular organismal process	34	6349	64	14485	0.53125	0.0849508	0.878702
GO:0009554	megasporogenesis	biological_process	developmental process	8	6349	12	14485	0.666667	0.0965841	0.878702
GO:0009556	microsporogenesis	biological_process	cellular process	15	6349	27	14485	0.555556	0.150458	0.878702
GO:0009558	embryo sac cellularization	biological_process	multicellular organismal process	3	6349	5	14485	0.6	0.385494	0.878702
GO:0009560	embryo sac egg cell differentiation	biological_process	cellular process	1	6349	1	14485	1	0.438315	0.878702
GO:0009561	megagametogenesis	biological_process	developmental process	12	6349	22	14485	0.545455	0.211664	0.878702
GO:0009617	response to bacterium	biological_process	multi-organism process	46	6349	88	14485	0.522727	0.0681901	0.878702
GO:0009620	response to fungus	biological_process	response to stimulus	28	6349	54	14485	0.518519	0.146343	0.878702
GO:0009624	response to nematode	biological_process	multi-organism process	39	6349	78	14485	0.5	0.161911	0.878702
GO:0009626	plant-type hypersensitive response	biological_process	cellular process	53	6349	117	14485	0.452991	0.408603	0.878702
GO:0009631	cold acclimation	biological_process	response to stimulus	13	6349	27	14485	0.481481	0.39546	0.878702
GO:0009635	response to herbicide	biological_process	response to stimulus	6	6349	8	14485	0.75	0.0779135	0.878702
GO:0009640	photomorphogenesis	biological_process	developmental process	22	6349	42	14485	0.52381	0.167793	0.878702
GO:0009644	response to high light intensity	biological_process	response to stimulus	20	6349	39	14485	0.512821	0.21787	0.878702
GO:0009646	response to absence of light	biological_process	response to stimulus	17	6349	29	14485	0.586207	0.0784292	0.878702
GO:0009653	anatomical structure morphogenesis	biological_process	developmental process	3	6349	3	14485	1	0.084187	0.878702
GO:0009657	plastid organization	biological_process	cellular component organization or biogenesis	4	6349	7	14485	0.571429	0.367073	0.878702
GO:0009658	chloroplast organization	biological_process	cellular process	63	6349	133	14485	0.473684	0.229802	0.878702
GO:0009662	etioplast organization	biological_process	cellular component organization or biogenesis	1	6349	1	14485	1	0.438315	0.878702
GO:0009664	plant-type cell wall organization	biological_process	cellular component organization or biogenesis	42	6349	87	14485	0.482759	0.232277	0.878702
GO:0009668	plastid membrane organization	biological_process	cellular process	3	6349	4	14485	0.75	0.226076	0.878702
GO:0009682	induced systemic resistance	biological_process	immune system process	7	6349	11	14485	0.636364	0.153929	0.878702
GO:0009687	abscisic acid metabolic process	biological_process	cellular process	3	6349	5	14485	0.6	0.385494	0.878702
GO:0009688	abscisic acid biosynthetic process	biological_process	cellular process	7	6349	14	14485	0.5	0.418529	0.878702
GO:0009693	ethylene biosynthetic process	biological_process	biological regulation	14	6349	26	14485	0.538462	0.20215	0.878702
GO:0009695	jasmonic acid biosynthetic process	biological_process	cellular process	11	6349	18	14485	0.611111	0.107778	0.878702
GO:0009696	salicylic acid metabolic process	biological_process	biological regulation	7	6349	12	14485	0.583333	0.234211	0.878702
GO:0009697	salicylic acid biosynthetic process	biological_process	cellular process	3	6349	4	14485	0.75	0.226076	0.878702
GO:0009698	phenylpropanoid metabolic process	biological_process	cellular process	9	6349	16	14485	0.5625	0.225905	0.878702
GO:0009704	de-etiolation	biological_process	developmental process	9	6349	13	14485	0.692308	0.0588919	0.878702
GO:0009718	anthocyanin-containing compound biosynthetic process	biological_process	metabolic process	11	6349	20	14485	0.55	0.216472	0.878702
GO:0009725	response to hormone	biological_process	response to stimulus	10	6349	18	14485	0.555556	0.221247	0.878702
GO:0009735	response to cytokinin	biological_process	response to stimulus	55	6349	110	14485	0.5	0.112944	0.878702
GO:0009736	cytokinin-activated signaling pathway	biological_process	cellular process	29	6349	56	14485	0.517857	0.143092	0.878702
GO:0009738	abscisic acid-activated signaling pathway	biological_process	biological regulation	124	6349	258	14485	0.48062	0.0939164	0.878702
GO:0009740	gibberellic acid mediated signaling pathway	biological_process	response to stimulus	29	6349	62	14485	0.467742	0.365433	0.878702
GO:0009749	response to glucose	biological_process	response to stimulus	20	6349	34	14485	0.588235	0.0563741	0.878702
GO:0009750	response to fructose	biological_process	response to stimulus	6	6349	12	14485	0.5	0.440037	0.878702
GO:0009751	response to salicylic acid	biological_process	response to stimulus	67	6349	143	14485	0.468531	0.25819	0.878702
GO:0009753	response to jasmonic acid	biological_process	response to stimulus	54	6349	107	14485	0.504673	0.0987344	0.878702
GO:0009759	indole glucosinolate biosynthetic process	biological_process	cellular process	6	6349	8	14485	0.75	0.0779135	0.878702
GO:0009767	photosynthetic electron transport chain	biological_process	metabolic process	7	6349	10	14485	0.7	0.0889772	0.878702
GO:0009785	blue light signaling pathway	biological_process	biological regulation	7	6349	12	14485	0.583333	0.234211	0.878702
GO:0009787	regulation of abscisic acid-activated signaling pathway	biological_process	regulation of biological process	15	6349	30	14485	0.5	0.307785	0.878702
GO:0009799	specification of symmetry	biological_process	developmental process	4	6349	5	14485	0.8	0.119797	0.878702
GO:0009809	lignin biosynthetic process	biological_process	cellular process	30	6349	64	14485	0.46875	0.355834	0.878702
GO:0009812	flavonoid metabolic process	biological_process	metabolic process	4	6349	5	14485	0.8	0.119797	0.878702
GO:0009813	flavonoid biosynthetic process	biological_process	metabolic process	29	6349	63	14485	0.460317	0.408984	0.878702
GO:0009814	defense response, incompatible interaction	biological_process	multi-organism process	19	6349	37	14485	0.513514	0.223816	0.878702
GO:0009817	defense response to fungus, incompatible interaction	biological_process	immune system process	12	6349	22	14485	0.545455	0.211664	0.878702
GO:0009828	plant-type cell wall loosening	biological_process	cellular component organization or biogenesis	4	6349	7	14485	0.571429	0.367073	0.878702
GO:0009830	cell wall modification involved in abscission	biological_process	developmental process	1	6349	1	14485	1	0.438315	0.878702
GO:0009832	plant-type cell wall biogenesis	biological_process	cellular component organization or biogenesis	17	6349	36	14485	0.472222	0.401924	0.878702
GO:0009834	plant-type secondary cell wall biogenesis	biological_process	cellular process	27	6349	56	14485	0.482143	0.297781	0.878702
GO:0009845	seed germination	biological_process	developmental process	34	6349	73	14485	0.465753	0.359687	0.878702
GO:0009846	pollen germination	biological_process	multi-organism process	34	6349	69	14485	0.492754	0.213759	0.878702
GO:0009854	oxidative photosynthetic carbon pathway	biological_process	cellular process	4	6349	7	14485	0.571429	0.367073	0.878702
GO:0009855	determination of bilateral symmetry	biological_process	developmental process	1	6349	1	14485	1	0.438315	0.878702
GO:0009856	pollination	biological_process	multi-organism process	3	6349	3	14485	1	0.084187	0.878702
GO:0009860	pollen tube growth	biological_process	cellular process	45	6349	92	14485	0.48913	0.1892	0.878702
GO:0009866	induced systemic resistance, ethylene mediated signaling pathway	biological_process	biological regulation	2	6349	3	14485	0.666667	0.407936	0.878702
GO:0009871	jasmonic acid and ethylene-dependent systemic resistance, ethylene mediated signaling pathway	biological_process	biological regulation	1	6349	1	14485	1	0.438315	0.878702
GO:0009892	negative regulation of metabolic process	biological_process	metabolic process	1	6349	1	14485	1	0.438315	0.878702
GO:0009901	anther dehiscence	biological_process	multicellular organismal process	10	6349	19	14485	0.526316	0.292081	0.878702
GO:0009903	chloroplast avoidance movement	biological_process	cellular process	8	6349	14	14485	0.571429	0.230305	0.878702
GO:0009904	chloroplast accumulation movement	biological_process	cellular process	8	6349	12	14485	0.666667	0.0965841	0.878702
GO:0009909	regulation of flower development	biological_process	biological regulation	38	6349	84	14485	0.452381	0.438587	0.878702
GO:0009913	epidermal cell differentiation	biological_process	cellular process	4	6349	6	14485	0.666667	0.236241	0.878702
GO:0009943	adaxial/abaxial axis specification	biological_process	developmental process	5	6349	6	14485	0.833333	0.0615752	0.878702
GO:0009944	polarity specification of adaxial/abaxial axis	biological_process	developmental process	17	6349	30	14485	0.566667	0.108978	0.878702
GO:0009947	centrolateral axis specification	biological_process	developmental process	2	6349	2	14485	1	0.192104	0.878702
GO:0009954	proximal/distal pattern formation	biological_process	developmental process	4	6349	6	14485	0.666667	0.236241	0.878702
GO:0009956	radial pattern formation	biological_process	developmental process	4	6349	6	14485	0.666667	0.236241	0.878702
GO:0009958	positive gravitropism	biological_process	response to stimulus	11	6349	18	14485	0.611111	0.107778	0.878702
GO:0009965	leaf morphogenesis	biological_process	developmental process	35	6349	76	14485	0.460526	0.389941	0.878702
GO:0009971	anastral spindle assembly involved in male meiosis	biological_process	cellular process	2	6349	2	14485	1	0.192104	0.878702
GO:0009972	cytidine deamination	biological_process	metabolic process	1	6349	1	14485	1	0.438315	0.878702
GO:0009992	cellular water homeostasis	biological_process	biological regulation	3	6349	5	14485	0.6	0.385494	0.878702
GO:0010016	shoot system morphogenesis	biological_process	developmental process	4	6349	7	14485	0.571429	0.367073	0.878702
GO:0010017	red or far-red light signaling pathway	biological_process	biological regulation	8	6349	16	14485	0.5	0.399686	0.878702
GO:0010021	amylopectin biosynthetic process	biological_process	metabolic process	3	6349	5	14485	0.6	0.385494	0.878702
GO:0010022	meristem determinacy	biological_process	developmental process	2	6349	3	14485	0.666667	0.407936	0.878702
GO:0010025	wax biosynthetic process	biological_process	metabolic process	18	6349	32	14485	0.5625	0.10807	0.878702
GO:0010029	regulation of seed germination	biological_process	biological regulation	22	6349	41	14485	0.536585	0.1332	0.878702
GO:0010032	meiotic chromosome condensation	biological_process	cellular process	3	6349	4	14485	0.75	0.226076	0.878702
GO:0010037	response to carbon dioxide	biological_process	response to stimulus	6	6349	8	14485	0.75	0.0779135	0.878702
GO:0010042	response to manganese ion	biological_process	response to stimulus	1	6349	1	14485	1	0.438315	0.878702
GO:0010044	response to aluminum ion	biological_process	response to stimulus	9	6349	14	14485	0.642857	0.101831	0.878702
GO:0010047	fruit dehiscence	biological_process	multicellular organismal process	6	6349	8	14485	0.75	0.0779135	0.878702
GO:0010051	xylem and phloem pattern formation	biological_process	developmental process	12	6349	24	14485	0.5	0.341038	0.878702
GO:0010055	atrichoblast differentiation	biological_process	developmental process	1	6349	1	14485	1	0.438315	0.878702
GO:0010068	protoderm histogenesis	biological_process	developmental process	3	6349	5	14485	0.6	0.385494	0.878702
GO:0010069	zygote asymmetric cytokinesis in embryo sac	biological_process	reproduction	3	6349	5	14485	0.6	0.385494	0.878702
GO:0010075	regulation of meristem growth	biological_process	biological regulation	8	6349	12	14485	0.666667	0.0965841	0.878702
GO:0010088	phloem development	biological_process	developmental process	9	6349	14	14485	0.642857	0.101831	0.878702
GO:0010089	xylem development	biological_process	developmental process	16	6349	28	14485	0.571429	0.109688	0.878702
GO:0010093	specification of floral organ identity	biological_process	developmental process	5	6349	9	14485	0.555556	0.351197	0.878702
GO:0010094	specification of carpel identity	biological_process	developmental process	2	6349	3	14485	0.666667	0.407936	0.878702
GO:0010109	regulation of photosynthesis	biological_process	biological regulation	5	6349	9	14485	0.555556	0.351197	0.878702
GO:0010111	glyoxysome organization	biological_process	cellular component organization or biogenesis	2	6349	2	14485	1	0.192104	0.878702
GO:0010112	regulation of systemic acquired resistance	biological_process	biological regulation	3	6349	4	14485	0.75	0.226076	0.878702
GO:0010114	response to red light	biological_process	response to stimulus	19	6349	40	14485	0.475	0.376737	0.878702
GO:0010119	regulation of stomatal movement	biological_process	biological regulation	26	6349	50	14485	0.52	0.153111	0.878702
GO:0010120	camalexin biosynthetic process	biological_process	cellular process	3	6349	5	14485	0.6	0.385494	0.878702
GO:0010124	phenylacetate catabolic process	biological_process	biological regulation	2	6349	2	14485	1	0.192104	0.878702
GO:0010133	proline catabolic process to glutamate	biological_process	cellular process	2	6349	2	14485	1	0.192104	0.878702
GO:0010136	ureide catabolic process	biological_process	cellular process	2	6349	3	14485	0.666667	0.407936	0.878702
GO:0010148	transpiration	biological_process	localization	3	6349	5	14485	0.6	0.385494	0.878702
GO:0010154	fruit development	biological_process	developmental process	11	6349	19	14485	0.578947	0.157497	0.878702
GO:0010157	response to chlorate	biological_process	response to stimulus	1	6349	1	14485	1	0.438315	0.878702
GO:0010158	abaxial cell fate specification	biological_process	cellular process	6	6349	8	14485	0.75	0.0779135	0.878702
GO:0010161	red light signaling pathway	biological_process	cellular process	3	6349	3	14485	1	0.084187	0.878702
GO:0010162	seed dormancy process	biological_process	developmental process	7	6349	13	14485	0.538462	0.324417	0.878702
GO:0010167	response to nitrate	biological_process	response to stimulus	11	6349	19	14485	0.578947	0.157497	0.878702
GO:0010184	cytokinin transport	biological_process	biological regulation	2	6349	3	14485	0.666667	0.407936	0.878702
GO:0010187	negative regulation of seed germination	biological_process	biological regulation	13	6349	26	14485	0.5	0.329188	0.878702
GO:0010190	cytochrome b6f complex assembly	biological_process	cellular process	5	6349	6	14485	0.833333	0.0615752	0.878702
GO:0010193	response to ozone	biological_process	response to stimulus	13	6349	26	14485	0.5	0.329188	0.878702
GO:0010200	response to chitin	biological_process	response to stimulus	52	6349	110	14485	0.472727	0.26246	0.878702
GO:0010201	response to continuous far red light stimulus by the high-irradiance response system	biological_process	response to stimulus	2	6349	2	14485	1	0.192104	0.878702
GO:0010206	photosystem II repair	biological_process	cellular process	7	6349	11	14485	0.636364	0.153929	0.878702
GO:0010212	response to ionizing radiation	biological_process	response to stimulus	3	6349	3	14485	1	0.084187	0.878702
GO:0010214	seed coat development	biological_process	reproduction	17	6349	34	14485	0.5	0.288851	0.878702
GO:0010215	cellulose microfibril organization	biological_process	cellular component organization or biogenesis	11	6349	18	14485	0.611111	0.107778	0.878702
GO:0010216	maintenance of DNA methylation	biological_process	metabolic process	5	6349	9	14485	0.555556	0.351197	0.878702
GO:0010218	response to far red light	biological_process	response to stimulus	12	6349	24	14485	0.5	0.341038	0.878702
GO:0010220	positive regulation of vernalization response	biological_process	biological regulation	1	6349	1	14485	1	0.438315	0.878702
GO:0010223	secondary shoot formation	biological_process	developmental process	9	6349	17	14485	0.529412	0.302064	0.878702
GO:0010227	floral organ abscission	biological_process	developmental process	7	6349	14	14485	0.5	0.418529	0.878702
GO:0010230	alternative respiration	biological_process	cellular process	1	6349	1	14485	1	0.438315	0.878702
GO:0010231	maintenance of seed dormancy	biological_process	developmental process	3	6349	5	14485	0.6	0.385494	0.878702
GO:0010233	phloem transport	biological_process	localization	5	6349	8	14485	0.625	0.238458	0.878702
GO:0010241	ent-kaurene oxidation to kaurenoic acid	biological_process	cellular process	1	6349	1	14485	1	0.438315	0.878702
GO:0010245	radial microtubular system formation	biological_process	cellular component organization or biogenesis	2	6349	2	14485	1	0.192104	0.878702
GO:0010254	nectary development	biological_process	multicellular organismal process	3	6349	4	14485	0.75	0.226076	0.878702
GO:0010258	NADH dehydrogenase complex (plastoquinone) assembly	biological_process	cellular component organization or biogenesis	3	6349	3	14485	1	0.084187	0.878702
GO:0010265	SCF complex assembly	biological_process	cellular component organization or biogenesis	1	6349	1	14485	1	0.438315	0.878702
GO:0010274	hydrotropism	biological_process	response to stimulus	10	6349	17	14485	0.588235	0.158209	0.878702
GO:0010275	NAD(P)H dehydrogenase complex assembly	biological_process	cellular component organization or biogenesis	2	6349	3	14485	0.666667	0.407936	0.878702
GO:0010304	PSII associated light-harvesting complex II catabolic process	biological_process	cellular process	3	6349	3	14485	1	0.084187	0.878702
GO:0010305	leaf vascular tissue pattern formation	biological_process	multicellular organismal process	13	6349	26	14485	0.5	0.329188	0.878702
GO:0010311	lateral root formation	biological_process	multicellular organismal process	19	6349	34	14485	0.558824	0.107006	0.878702
GO:0010322	regulation of isopentenyl diphosphate biosynthetic process, methylerythritol 4-phosphate pathway	biological_process	biological regulation	3	6349	3	14485	1	0.084187	0.878702
GO:0010325	raffinose family oligosaccharide biosynthetic process	biological_process	metabolic process	3	6349	4	14485	0.75	0.226076	0.878702
GO:0010338	leaf formation	biological_process	developmental process	2	6349	3	14485	0.666667	0.407936	0.878702
GO:0010342	endosperm cellularization	biological_process	developmental process	2	6349	2	14485	1	0.192104	0.878702
GO:0010350	cellular response to magnesium starvation	biological_process	cellular process	1	6349	1	14485	1	0.438315	0.878702
GO:0010358	leaf shaping	biological_process	developmental process	1	6349	1	14485	1	0.438315	0.878702
GO:0010359	regulation of anion channel activity	biological_process	biological regulation	6	6349	12	14485	0.5	0.440037	0.878702
GO:0010360	negative regulation of anion channel activity	biological_process	biological regulation	2	6349	2	14485	1	0.192104	0.878702
GO:0010362	negative regulation of anion channel activity by blue light	biological_process	biological regulation	1	6349	1	14485	1	0.438315	0.878702
GO:0010375	stomatal complex patterning	biological_process	multicellular organismal process	5	6349	7	14485	0.714286	0.138118	0.878702
GO:0010377	guard cell fate commitment	biological_process	multicellular organismal process	2	6349	3	14485	0.666667	0.407936	0.878702
GO:0010380	regulation of chlorophyll biosynthetic process	biological_process	biological regulation	19	6349	32	14485	0.59375	0.0558272	0.878702
GO:0010387	COP9 signalosome assembly	biological_process	cellular component organization or biogenesis	3	6349	5	14485	0.6	0.385494	0.878702
GO:0010392	galactoglucomannan metabolic process	biological_process	metabolic process	2	6349	3	14485	0.666667	0.407936	0.878702
GO:0010411	xyloglucan metabolic process	biological_process	cellular process	22	6349	46	14485	0.478261	0.343615	0.878702
GO:0010413	glucuronoxylan metabolic process	biological_process	cellular process	2	6349	3	14485	0.666667	0.407936	0.878702
GO:0010423	negative regulation of brassinosteroid biosynthetic process	biological_process	biological regulation	2	6349	2	14485	1	0.192104	0.878702
GO:0010424	DNA methylation on cytosine within a CG sequence	biological_process	cellular process	4	6349	5	14485	0.8	0.119797	0.878702
GO:0010426	DNA methylation on cytosine within a CHH sequence	biological_process	metabolic process	2	6349	2	14485	1	0.192104	0.878702
GO:0010434	bract formation	biological_process	developmental process	2	6349	3	14485	0.666667	0.407936	0.878702
GO:0010438	cellular response to sulfur starvation	biological_process	cellular process	3	6349	3	14485	1	0.084187	0.878702
GO:0010439	regulation of glucosinolate biosynthetic process	biological_process	biological regulation	4	6349	5	14485	0.8	0.119797	0.878702
GO:0010447	response to acidic pH	biological_process	response to stimulus	6	6349	10	14485	0.6	0.237199	0.878702
GO:0010450	inflorescence meristem growth	biological_process	developmental process	2	6349	3	14485	0.666667	0.407936	0.878702
GO:0010452	histone H3-K36 methylation	biological_process	metabolic process	4	6349	7	14485	0.571429	0.367073	0.878702
GO:0010468	regulation of gene expression	biological_process	biological regulation	33	6349	71	14485	0.464789	0.368883	0.878702
GO:0010469	regulation of signaling receptor activity	biological_process	biological regulation	5	6349	7	14485	0.714286	0.138118	0.878702
GO:0010477	response to sulfur dioxide	biological_process	response to stimulus	1	6349	1	14485	1	0.438315	0.878702
GO:0010479	stele development	biological_process	developmental process	2	6349	2	14485	1	0.192104	0.878702
GO:0010493	Lewis a epitope biosynthetic process	biological_process	cellular process	1	6349	1	14485	1	0.438315	0.878702
GO:0010497	plasmodesmata-mediated intercellular transport	biological_process	cellular process	7	6349	13	14485	0.538462	0.324417	0.878702
GO:0010529	negative regulation of transposition	biological_process	biological regulation	1	6349	1	14485	1	0.438315	0.878702
GO:0010582	floral meristem determinacy	biological_process	developmental process	9	6349	14	14485	0.642857	0.101831	0.878702
GO:0010588	cotyledon vascular tissue pattern formation	biological_process	developmental process	12	6349	20	14485	0.6	0.109244	0.878702
GO:0010620	negative regulation of transcription by transcription factor catabolism	biological_process	regulation of biological process	1	6349	1	14485	1	0.438315	0.878702
GO:0010647	positive regulation of cell communication	biological_process	biological regulation	1	6349	1	14485	1	0.438315	0.878702
GO:0010730	negative regulation of hydrogen peroxide biosynthetic process	biological_process	biological regulation	1	6349	1	14485	1	0.438315	0.878702
GO:0010792	DNA double-strand break processing involved in repair via single-strand annealing	biological_process	cellular process	1	6349	1	14485	1	0.438315	0.878702
GO:0010865	stipule development	biological_process	developmental process	2	6349	2	14485	1	0.192104	0.878702
GO:0010922	positive regulation of phosphatase activity	biological_process	cellular process	1	6349	1	14485	1	0.438315	0.878702
GO:0010930	negative regulation of auxin mediated signaling pathway	biological_process	biological regulation	8	6349	15	14485	0.533333	0.312796	0.878702
GO:0010960	magnesium ion homeostasis	biological_process	biological regulation	1	6349	1	14485	1	0.438315	0.878702
GO:0010966	regulation of phosphate transport	biological_process	biological regulation	2	6349	3	14485	0.666667	0.407936	0.878702
GO:0015675	nickel cation transport	biological_process	localization	2	6349	2	14485	1	0.192104	0.878702
GO:0015680	protein maturation by copper ion transfer	biological_process	metabolic process	1	6349	1	14485	1	0.438315	0.878702
GO:0015698	inorganic anion transport	biological_process	localization	1	6349	1	14485	1	0.438315	0.878702
GO:0015706	nitrate transport	biological_process	localization	26	6349	46	14485	0.565217	0.0566294	0.878702
GO:0015711	organic anion transport	biological_process	localization	1	6349	1	14485	1	0.438315	0.878702
GO:0015746	citrate transport	biological_process	localization	2	6349	2	14485	1	0.192104	0.878702
GO:0015798	myo-inositol transport	biological_process	localization	2	6349	3	14485	0.666667	0.407936	0.878702
GO:0015810	aspartate transmembrane transport	biological_process	localization	2	6349	2	14485	1	0.192104	0.878702
GO:0015824	proline transport	biological_process	localization	1	6349	1	14485	1	0.438315	0.878702
GO:0015827	tryptophan transport	biological_process	localization	2	6349	2	14485	1	0.192104	0.878702
GO:0015833	peptide transport	biological_process	localization	1	6349	1	14485	1	0.438315	0.878702
GO:0015846	polyamine transport	biological_process	localization	5	6349	8	14485	0.625	0.238458	0.878702
GO:0015853	adenine transport	biological_process	localization	2	6349	2	14485	1	0.192104	0.878702
GO:0015854	guanine transport	biological_process	localization	2	6349	2	14485	1	0.192104	0.878702
GO:0015865	purine nucleotide transport	biological_process	localization	1	6349	1	14485	1	0.438315	0.878702
GO:0015970	guanosine tetraphosphate biosynthetic process	biological_process	cellular process	1	6349	1	14485	1	0.438315	0.878702
GO:0015979	photosynthesis	biological_process	cellular process	47	6349	95	14485	0.494737	0.156676	0.878702
GO:0015994	chlorophyll metabolic process	biological_process	cellular process	3	6349	4	14485	0.75	0.226076	0.878702
GO:0015996	chlorophyll catabolic process	biological_process	cellular process	7	6349	13	14485	0.538462	0.324417	0.878702
GO:0016052	carbohydrate catabolic process	biological_process	metabolic process	1	6349	1	14485	1	0.438315	0.878702
GO:0016075	rRNA catabolic process	biological_process	cellular process	4	6349	6	14485	0.666667	0.236241	0.878702
GO:0016094	polyprenol biosynthetic process	biological_process	cellular process	3	6349	4	14485	0.75	0.226076	0.878702
GO:0016104	triterpenoid biosynthetic process	biological_process	metabolic process	2	6349	3	14485	0.666667	0.407936	0.878702
GO:0016117	carotenoid biosynthetic process	biological_process	metabolic process	10	6349	16	14485	0.625	0.10541	0.878702
GO:0016120	carotene biosynthetic process	biological_process	cellular process	5	6349	6	14485	0.833333	0.0615752	0.878702
GO:0016121	carotene catabolic process	biological_process	cellular process	6	6349	8	14485	0.75	0.0779135	0.878702
GO:0016122	xanthophyll metabolic process	biological_process	cellular process	3	6349	4	14485	0.75	0.226076	0.878702
GO:0016123	xanthophyll biosynthetic process	biological_process	cellular process	5	6349	7	14485	0.714286	0.138118	0.878702
GO:0016124	xanthophyll catabolic process	biological_process	cellular process	2	6349	3	14485	0.666667	0.407936	0.878702
GO:0016310	phosphorylation	biological_process	cellular process	44	6349	96	14485	0.458333	0.383224	0.878702
GO:0016311	dephosphorylation	biological_process	cellular process	15	6349	32	14485	0.46875	0.430238	0.878702
GO:0016480	negative regulation of transcription by RNA polymerase III	biological_process	biological regulation	1	6349	1	14485	1	0.438315	0.878702
GO:0016540	protein autoprocessing	biological_process	metabolic process	2	6349	3	14485	0.666667	0.407936	0.878702
GO:0016572	histone phosphorylation	biological_process	cellular component organization or biogenesis	3	6349	3	14485	1	0.084187	0.878702
GO:0016584	nucleosome positioning	biological_process	cellular component organization or biogenesis	7	6349	10	14485	0.7	0.0889772	0.878702
GO:0017009	protein-phycocyanobilin linkage	biological_process	cellular process	1	6349	1	14485	1	0.438315	0.878702
GO:0017126	nucleologenesis	biological_process	cellular process	2	6349	2	14485	1	0.192104	0.878702
GO:0018022	peptidyl-lysine methylation	biological_process	cellular process	1	6349	1	14485	1	0.438315	0.878702
GO:0018108	peptidyl-tyrosine phosphorylation	biological_process	cellular process	1	6349	1	14485	1	0.438315	0.878702
GO:0018160	peptidyl-pyrromethane cofactor linkage	biological_process	cellular process	1	6349	1	14485	1	0.438315	0.878702
GO:0018171	peptidyl-cysteine oxidation	biological_process	cellular process	2	6349	3	14485	0.666667	0.407936	0.878702
GO:0018293	protein-FAD linkage	biological_process	cellular process	1	6349	1	14485	1	0.438315	0.878702
GO:0018316	peptide cross-linking via L-cystine	biological_process	cellular process	1	6349	1	14485	1	0.438315	0.878702
GO:0018364	peptidyl-glutamine methylation	biological_process	cellular process	1	6349	1	14485	1	0.438315	0.878702
GO:0019265	glycine biosynthetic process, by transamination of glyoxylate	biological_process	biological regulation	1	6349	1	14485	1	0.438315	0.878702
GO:0019285	glycine betaine biosynthetic process from choline	biological_process	biological regulation	2	6349	2	14485	1	0.192104	0.878702
GO:0019288	isopentenyl diphosphate biosynthetic process, methylerythritol 4-phosphate pathway	biological_process	cellular process	4	6349	6	14485	0.666667	0.236241	0.878702
GO:0019343	cysteine biosynthetic process via cystathionine	biological_process	cellular process	2	6349	2	14485	1	0.192104	0.878702
GO:0019344	cysteine biosynthetic process	biological_process	cellular process	5	6349	9	14485	0.555556	0.351197	0.878702
GO:0019358	nicotinate nucleotide salvage	biological_process	metabolic process	2	6349	2	14485	1	0.192104	0.878702
GO:0019365	pyridine nucleotide salvage	biological_process	cellular process	2	6349	2	14485	1	0.192104	0.878702
GO:0019367	fatty acid elongation, saturated fatty acid	biological_process	cellular process	2	6349	2	14485	1	0.192104	0.878702
GO:0019370	leukotriene biosynthetic process	biological_process	cellular process	1	6349	1	14485	1	0.438315	0.878702
GO:0019375	galactolipid biosynthetic process	biological_process	cellular process	5	6349	7	14485	0.714286	0.138118	0.878702
GO:0019388	galactose catabolic process	biological_process	metabolic process	2	6349	2	14485	1	0.192104	0.878702
GO:0019419	sulfate reduction	biological_process	metabolic process	2	6349	3	14485	0.666667	0.407936	0.878702
GO:0019432	triglyceride biosynthetic process	biological_process	cellular process	10	6349	18	14485	0.555556	0.221247	0.878702
GO:0019433	triglyceride catabolic process	biological_process	cellular process	2	6349	3	14485	0.666667	0.407936	0.878702
GO:0019438	aromatic compound biosynthetic process	biological_process	cellular process	4	6349	7	14485	0.571429	0.367073	0.878702
GO:0019450	L-cysteine catabolic process to pyruvate	biological_process	cellular process	1	6349	1	14485	1	0.438315	0.878702
GO:0019458	methionine catabolic process via 2-oxobutanoate	biological_process	cellular process	2	6349	2	14485	1	0.192104	0.878702
GO:0019464	glycine decarboxylation via glycine cleavage system	biological_process	biological regulation	2	6349	3	14485	0.666667	0.407936	0.878702
GO:0019521	D-gluconate metabolic process	biological_process	cellular process	2	6349	3	14485	0.666667	0.407936	0.878702
GO:0019563	glycerol catabolic process	biological_process	cellular process	2	6349	3	14485	0.666667	0.407936	0.878702
GO:0019605	butyrate metabolic process	biological_process	cellular process	3	6349	4	14485	0.75	0.226076	0.878702
GO:0019677	NAD catabolic process	biological_process	cellular process	1	6349	1	14485	1	0.438315	0.878702
GO:0019684	photosynthesis, light reaction	biological_process	cellular process	3	6349	4	14485	0.75	0.226076	0.878702
GO:0019725	cellular homeostasis	biological_process	biological regulation	1	6349	1	14485	1	0.438315	0.878702
GO:0019742	pentacyclic triterpenoid metabolic process	biological_process	cellular process	1	6349	1	14485	1	0.438315	0.878702
GO:0019752	carboxylic acid metabolic process	biological_process	cellular process	13	6349	26	14485	0.5	0.329188	0.878702
GO:0019760	glucosinolate metabolic process	biological_process	cellular process	15	6349	26	14485	0.576923	0.110149	0.878702
GO:0019853	L-ascorbic acid biosynthetic process	biological_process	cellular process	7	6349	14	14485	0.5	0.418529	0.878702
GO:0019878	lysine biosynthetic process via aminoadipic acid	biological_process	metabolic process	1	6349	1	14485	1	0.438315	0.878702
GO:0019941	modification-dependent protein catabolic process	biological_process	cellular process	4	6349	6	14485	0.666667	0.236241	0.878702
GO:0022414	reproductive process	biological_process	reproduction	1	6349	1	14485	1	0.438315	0.878702
GO:0022417	protein maturation by protein folding	biological_process	cellular process	1	6349	1	14485	1	0.438315	0.878702
GO:0022619	generative cell differentiation	biological_process	cellular process	1	6349	1	14485	1	0.438315	0.878702
GO:0023014	signal transduction by protein phosphorylation	biological_process	response to stimulus	30	6349	64	14485	0.46875	0.355834	0.878702
GO:0023052	signaling	biological_process	signaling	3	6349	5	14485	0.6	0.385494	0.878702
GO:0030001	metal ion transport	biological_process	localization	33	6349	60	14485	0.55	0.0534964	0.878702
GO:0030007	cellular potassium ion homeostasis	biological_process	biological regulation	4	6349	7	14485	0.571429	0.367073	0.878702
GO:0030026	cellular manganese ion homeostasis	biological_process	biological regulation	6	6349	12	14485	0.5	0.440037	0.878702
GO:0030042	actin filament depolymerization	biological_process	cellular component organization or biogenesis	8	6349	13	14485	0.615385	0.156892	0.878702
GO:0030071	regulation of mitotic metaphase/anaphase transition	biological_process	biological regulation	1	6349	1	14485	1	0.438315	0.878702
GO:0030154	cell differentiation	biological_process	cellular process	87	6349	193	14485	0.450777	0.389421	0.878702
GO:0030174	regulation of DNA-dependent DNA replication initiation	biological_process	cellular process	2	6349	2	14485	1	0.192104	0.878702
GO:0030187	melatonin biosynthetic process	biological_process	biological regulation	2	6349	3	14485	0.666667	0.407936	0.878702
GO:0030244	cellulose biosynthetic process	biological_process	cellular process	29	6349	56	14485	0.517857	0.143092	0.878702
GO:0030245	cellulose catabolic process	biological_process	cellular process	11	6349	20	14485	0.55	0.216472	0.878702
GO:0030388	fructose 1,6-bisphosphate metabolic process	biological_process	metabolic process	2	6349	2	14485	1	0.192104	0.878702
GO:0030418	nicotianamine biosynthetic process	biological_process	cellular process	1	6349	1	14485	1	0.438315	0.878702
GO:0030447	filamentous growth	biological_process	growth	1	6349	1	14485	1	0.438315	0.878702
GO:0030488	tRNA methylation	biological_process	cellular process	10	6349	17	14485	0.588235	0.158209	0.878702
GO:0030491	heteroduplex formation	biological_process	metabolic process	2	6349	2	14485	1	0.192104	0.878702
GO:0030497	fatty acid elongation	biological_process	cellular process	2	6349	2	14485	1	0.192104	0.878702
GO:0030639	polyketide biosynthetic process	biological_process	metabolic process	2	6349	2	14485	1	0.192104	0.878702
GO:0030643	cellular phosphate ion homeostasis	biological_process	biological regulation	3	6349	4	14485	0.75	0.226076	0.878702
GO:0030865	cortical cytoskeleton organization	biological_process	cellular component organization or biogenesis	3	6349	4	14485	0.75	0.226076	0.878702
GO:0031047	gene silencing by RNA	biological_process	metabolic process	28	6349	57	14485	0.491228	0.249699	0.878702
GO:0031054	pre-miRNA processing	biological_process	biological regulation	3	6349	5	14485	0.6	0.385494	0.878702
GO:0031060	regulation of histone methylation	biological_process	biological regulation	2	6349	3	14485	0.666667	0.407936	0.878702
GO:0031081	nuclear pore distribution	biological_process	cellular component organization or biogenesis	1	6349	1	14485	1	0.438315	0.878702
GO:0031098	stress-activated protein kinase signaling cascade	biological_process	cellular process	28	6349	50	14485	0.56	0.055974	0.878702
GO:0031110	regulation of microtubule polymerization or depolymerization	biological_process	regulation of biological process	2	6349	2	14485	1	0.192104	0.878702
GO:0031115	negative regulation of microtubule polymerization	biological_process	biological regulation	1	6349	1	14485	1	0.438315	0.878702
GO:0031117	positive regulation of microtubule depolymerization	biological_process	cellular component organization or biogenesis	1	6349	1	14485	1	0.438315	0.878702
GO:0031118	rRNA pseudouridine synthesis	biological_process	cellular component organization or biogenesis	3	6349	3	14485	1	0.084187	0.878702
GO:0031120	snRNA pseudouridine synthesis	biological_process	cellular process	3	6349	3	14485	1	0.084187	0.878702
GO:0031122	cytoplasmic microtubule organization	biological_process	cellular component organization or biogenesis	7	6349	12	14485	0.583333	0.234211	0.878702
GO:0031124	mRNA 3'-end processing	biological_process	cellular process	2	6349	3	14485	0.666667	0.407936	0.878702
GO:0031126	snoRNA 3'-end processing	biological_process	cellular process	1	6349	1	14485	1	0.438315	0.878702
GO:0031155	regulation of reproductive fruiting body development	biological_process	biological regulation	2	6349	2	14485	1	0.192104	0.878702
GO:0031167	rRNA methylation	biological_process	cellular component organization or biogenesis	10	6349	16	14485	0.625	0.10541	0.878702
GO:0031222	arabinan catabolic process	biological_process	metabolic process	3	6349	5	14485	0.6	0.385494	0.878702
GO:0031365	N-terminal protein amino acid modification	biological_process	cellular process	3	6349	5	14485	0.6	0.385494	0.878702
GO:0031408	oxylipin biosynthetic process	biological_process	cellular process	21	6349	37	14485	0.567568	0.0782373	0.878702
GO:0031468	nuclear envelope reassembly	biological_process	cellular component organization or biogenesis	2	6349	3	14485	0.666667	0.407936	0.878702
GO:0031505	fungal-type cell wall organization	biological_process	cellular component organization or biogenesis	1	6349	1	14485	1	0.438315	0.878702
GO:0031507	heterochromatin assembly	biological_process	cellular component organization or biogenesis	2	6349	2	14485	1	0.192104	0.878702
GO:0031525	menthol biosynthetic process	biological_process	metabolic process	2	6349	2	14485	1	0.192104	0.878702
GO:0031567	mitotic cell size control checkpoint	biological_process	biological regulation	2	6349	3	14485	0.666667	0.407936	0.878702
GO:0031579	membrane raft organization	biological_process	cellular component organization or biogenesis	1	6349	1	14485	1	0.438315	0.878702
GO:0031640	killing of cells of other organism	biological_process	cell killing	11	6349	22	14485	0.5	0.353817	0.878702
GO:0031848	protection from non-homologous end joining at telomere	biological_process	biological regulation	1	6349	1	14485	1	0.438315	0.878702
GO:0031936	negative regulation of chromatin silencing	biological_process	biological regulation	9	6349	15	14485	0.6	0.158127	0.878702
GO:0031998	regulation of fatty acid beta-oxidation	biological_process	biological regulation	1	6349	1	14485	1	0.438315	0.878702
GO:0032055	negative regulation of translation in response to stress	biological_process	biological regulation	1	6349	1	14485	1	0.438315	0.878702
GO:0032107	regulation of response to nutrient levels	biological_process	response to stimulus	1	6349	1	14485	1	0.438315	0.878702
GO:0032366	intracellular sterol transport	biological_process	localization	1	6349	1	14485	1	0.438315	0.878702
GO:0032467	positive regulation of cytokinesis	biological_process	biological regulation	1	6349	1	14485	1	0.438315	0.878702
GO:0032502	developmental process	biological_process	developmental process	19	6349	38	14485	0.5	0.271885	0.878702
GO:0032504	multicellular organism reproduction	biological_process	multicellular organismal process	2	6349	3	14485	0.666667	0.407936	0.878702
GO:0032774	RNA biosynthetic process	biological_process	cellular process	1	6349	1	14485	1	0.438315	0.878702
GO:0032780	negative regulation of ATPase activity	biological_process	biological regulation	1	6349	1	14485	1	0.438315	0.878702
GO:0032869	cellular response to insulin stimulus	biological_process	cellular process	2	6349	2	14485	1	0.192104	0.878702
GO:0032876	negative regulation of DNA endoreduplication	biological_process	biological regulation	6	6349	8	14485	0.75	0.0779135	0.878702
GO:0032928	regulation of superoxide anion generation	biological_process	biological regulation	2	6349	3	14485	0.666667	0.407936	0.878702
GO:0032959	inositol trisphosphate biosynthetic process	biological_process	cellular process	3	6349	4	14485	0.75	0.226076	0.878702
GO:0032963	collagen metabolic process	biological_process	metabolic process	1	6349	1	14485	1	0.438315	0.878702
GO:0033198	response to ATP	biological_process	response to stimulus	1	6349	1	14485	1	0.438315	0.878702
GO:0033214	iron assimilation by chelation and transport	biological_process	biological regulation	1	6349	1	14485	1	0.438315	0.878702
GO:0033354	chlorophyll cycle	biological_process	cellular process	1	6349	1	14485	1	0.438315	0.878702
GO:0033358	UDP-L-arabinose biosynthetic process	biological_process	metabolic process	3	6349	5	14485	0.6	0.385494	0.878702
GO:0033387	putrescine biosynthetic process from ornithine	biological_process	cellular process	3	6349	3	14485	1	0.084187	0.878702
GO:0033466	trans-zeatin biosynthetic process	biological_process	biological regulation	1	6349	1	14485	1	0.438315	0.878702
GO:0033542	fatty acid beta-oxidation, unsaturated, even number	biological_process	cellular process	1	6349	1	14485	1	0.438315	0.878702
GO:0033566	gamma-tubulin complex localization	biological_process	localization	3	6349	3	14485	1	0.084187	0.878702
GO:0033567	DNA replication, Okazaki fragment processing	biological_process	metabolic process	2	6349	2	14485	1	0.192104	0.878702
GO:0033587	shikimate biosynthetic process	biological_process	cellular process	1	6349	1	14485	1	0.438315	0.878702
GO:0033611	oxalate catabolic process	biological_process	cellular process	2	6349	2	14485	1	0.192104	0.878702
GO:0033614	chloroplast proton-transporting ATP synthase complex assembly	biological_process	cellular component organization or biogenesis	2	6349	3	14485	0.666667	0.407936	0.878702
GO:0033615	mitochondrial proton-transporting ATP synthase complex assembly	biological_process	cellular component organization or biogenesis	1	6349	1	14485	1	0.438315	0.878702
GO:0034051	negative regulation of plant-type hypersensitive response	biological_process	biological regulation	3	6349	5	14485	0.6	0.385494	0.878702
GO:0034059	response to anoxia	biological_process	response to stimulus	1	6349	1	14485	1	0.438315	0.878702
GO:0034080	CENP-A containing nucleosome assembly	biological_process	cellular component organization or biogenesis	2	6349	2	14485	1	0.192104	0.878702
GO:0034090	maintenance of meiotic sister chromatid cohesion	biological_process	cellular component organization or biogenesis	1	6349	1	14485	1	0.438315	0.878702
GO:0034214	protein hexamerization	biological_process	cellular component organization or biogenesis	3	6349	4	14485	0.75	0.226076	0.878702
GO:0034286	response to maltose	biological_process	response to stimulus	2	6349	2	14485	1	0.192104	0.878702
GO:0034355	NAD salvage	biological_process	cellular process	2	6349	2	14485	1	0.192104	0.878702
GO:0034389	lipid droplet organization	biological_process	cellular process	4	6349	6	14485	0.666667	0.236241	0.878702
GO:0034440	lipid oxidation	biological_process	cellular process	2	6349	2	14485	1	0.192104	0.878702
GO:0034453	microtubule anchoring	biological_process	cellular component organization or biogenesis	1	6349	1	14485	1	0.438315	0.878702
GO:0034470	ncRNA processing	biological_process	cellular process	1	6349	1	14485	1	0.438315	0.878702
GO:0034473	U1 snRNA 3'-end processing	biological_process	cellular process	1	6349	1	14485	1	0.438315	0.878702
GO:0034476	U5 snRNA 3'-end processing	biological_process	cellular process	1	6349	1	14485	1	0.438315	0.878702
GO:0034484	raffinose catabolic process	biological_process	metabolic process	1	6349	1	14485	1	0.438315	0.878702
GO:0034501	protein localization to kinetochore	biological_process	localization	1	6349	1	14485	1	0.438315	0.878702
GO:0034508	centromere complex assembly	biological_process	cellular component organization or biogenesis	4	6349	5	14485	0.8	0.119797	0.878702
GO:0034553	mitochondrial respiratory chain complex II assembly	biological_process	cellular component organization or biogenesis	1	6349	1	14485	1	0.438315	0.878702
GO:0034587	piRNA metabolic process	biological_process	cellular process	1	6349	1	14485	1	0.438315	0.878702
GO:0034605	cellular response to heat	biological_process	cellular process	22	6349	47	14485	0.468085	0.393595	0.878702
GO:0034614	cellular response to reactive oxygen species	biological_process	response to stimulus	1	6349	1	14485	1	0.438315	0.878702
GO:0034620	cellular response to unfolded protein	biological_process	cellular process	7	6349	13	14485	0.538462	0.324417	0.878702
GO:0034625	fatty acid elongation, monounsaturated fatty acid	biological_process	cellular process	2	6349	2	14485	1	0.192104	0.878702
GO:0034626	fatty acid elongation, polyunsaturated fatty acid	biological_process	cellular process	2	6349	2	14485	1	0.192104	0.878702
GO:0034629	cellular protein-containing complex localization	biological_process	localization	1	6349	1	14485	1	0.438315	0.878702
GO:0034724	DNA replication-independent nucleosome organization	biological_process	cellular component organization or biogenesis	2	6349	3	14485	0.666667	0.407936	0.878702
GO:0034755	iron ion transmembrane transport	biological_process	localization	1	6349	1	14485	1	0.438315	0.878702
GO:0034757	negative regulation of iron ion transport	biological_process	biological regulation	1	6349	1	14485	1	0.438315	0.878702
GO:0034968	histone lysine methylation	biological_process	cellular component organization or biogenesis	5	6349	7	14485	0.714286	0.138118	0.878702
GO:0034970	histone H3-R2 methylation	biological_process	cellular component organization or biogenesis	2	6349	2	14485	1	0.192104	0.878702
GO:0034971	histone H3-R17 methylation	biological_process	cellular component organization or biogenesis	2	6349	2	14485	1	0.192104	0.878702
GO:0034972	histone H3-R26 methylation	biological_process	cellular component organization or biogenesis	2	6349	2	14485	1	0.192104	0.878702
GO:0034982	mitochondrial protein processing	biological_process	cellular process	3	6349	5	14485	0.6	0.385494	0.878702
GO:0035194	posttranscriptional gene silencing by RNA	biological_process	biological regulation	6	6349	8	14485	0.75	0.0779135	0.878702
GO:0035265	organ growth	biological_process	developmental process	6	6349	9	14485	0.666667	0.148266	0.878702
GO:0035266	meristem growth	biological_process	growth	2	6349	3	14485	0.666667	0.407936	0.878702
GO:0035280	miRNA loading onto RISC involved in gene silencing by miRNA	biological_process	cellular process	1	6349	1	14485	1	0.438315	0.878702
GO:0035344	hypoxanthine transport	biological_process	localization	2	6349	2	14485	1	0.192104	0.878702
GO:0035372	protein localization to microtubule	biological_process	localization	2	6349	2	14485	1	0.192104	0.878702
GO:0035407	histone H3-T11 phosphorylation	biological_process	cellular component organization or biogenesis	1	6349	1	14485	1	0.438315	0.878702
GO:0035444	nickel cation transmembrane transport	biological_process	localization	1	6349	1	14485	1	0.438315	0.878702
GO:0035518	histone H2A monoubiquitination	biological_process	cellular component organization or biogenesis	1	6349	1	14485	1	0.438315	0.878702
GO:0035670	plant-type ovary development	biological_process	developmental process	2	6349	3	14485	0.666667	0.407936	0.878702
GO:0035690	cellular response to drug	biological_process	cellular process	1	6349	1	14485	1	0.438315	0.878702
GO:0035825	homologous recombination	biological_process	cellular process	1	6349	1	14485	1	0.438315	0.878702
GO:0035998	7,8-dihydroneopterin 3'-triphosphate biosynthetic process	biological_process	cellular process	1	6349	1	14485	1	0.438315	0.878702
GO:0036092	phosphatidylinositol-3-phosphate biosynthetic process	biological_process	cellular process	3	6349	5	14485	0.6	0.385494	0.878702
GO:0036149	phosphatidylinositol acyl-chain remodeling	biological_process	cellular process	2	6349	2	14485	1	0.192104	0.878702
GO:0036168	filamentous growth of a population of unicellular organisms in response to heat	biological_process	response to stimulus	1	6349	1	14485	1	0.438315	0.878702
GO:0036170	filamentous growth of a population of unicellular organisms in response to starvation	biological_process	growth	1	6349	1	14485	1	0.438315	0.878702
GO:0036178	filamentous growth of a population of unicellular organisms in response to neutral pH	biological_process	growth	1	6349	1	14485	1	0.438315	0.878702
GO:0036180	filamentous growth of a population of unicellular organisms in response to biotic stimulus	biological_process	growth	1	6349	1	14485	1	0.438315	0.878702
GO:0036228	protein localization to nuclear inner membrane	biological_process	localization	2	6349	2	14485	1	0.192104	0.878702
GO:0036244	cellular response to neutral pH	biological_process	response to stimulus	1	6349	1	14485	1	0.438315	0.878702
GO:0036265	RNA (guanine-N7)-methylation	biological_process	metabolic process	1	6349	1	14485	1	0.438315	0.878702
GO:0036289	peptidyl-serine autophosphorylation	biological_process	cellular process	1	6349	1	14485	1	0.438315	0.878702
GO:0036290	protein trans-autophosphorylation	biological_process	metabolic process	1	6349	1	14485	1	0.438315	0.878702
GO:0036297	interstrand cross-link repair	biological_process	cellular process	5	6349	8	14485	0.625	0.238458	0.878702
GO:0040008	regulation of growth	biological_process	regulation of biological process	90	6349	182	14485	0.494505	0.0721962	0.878702
GO:0040009	regulation of growth rate	biological_process	biological regulation	4	6349	5	14485	0.8	0.119797	0.878702
GO:0042026	protein refolding	biological_process	cellular process	16	6349	34	14485	0.470588	0.415646	0.878702
GO:0042127	regulation of cell proliferation	biological_process	biological regulation	8	6349	15	14485	0.533333	0.312796	0.878702
GO:0042138	meiotic DNA double-strand break formation	biological_process	cellular process	6	6349	9	14485	0.666667	0.148266	0.878702
GO:0042148	strand invasion	biological_process	cellular process	2	6349	3	14485	0.666667	0.407936	0.878702
GO:0042246	tissue regeneration	biological_process	growth	1	6349	1	14485	1	0.438315	0.878702
GO:0042255	ribosome assembly	biological_process	cellular component organization or biogenesis	1	6349	1	14485	1	0.438315	0.878702
GO:0042273	ribosomal large subunit biogenesis	biological_process	cellular component organization or biogenesis	12	6349	22	14485	0.545455	0.211664	0.878702
GO:0042274	ribosomal small subunit biogenesis	biological_process	cellular component organization or biogenesis	4	6349	5	14485	0.8	0.119797	0.878702
GO:0042326	negative regulation of phosphorylation	biological_process	biological regulation	1	6349	1	14485	1	0.438315	0.878702
GO:0042343	indole glucosinolate metabolic process	biological_process	cellular process	6	6349	10	14485	0.6	0.237199	0.878702
GO:0042353	fucose biosynthetic process	biological_process	metabolic process	1	6349	1	14485	1	0.438315	0.878702
GO:0042391	regulation of membrane potential	biological_process	biological regulation	2	6349	2	14485	1	0.192104	0.878702
GO:0042539	hypotonic salinity response	biological_process	response to stimulus	2	6349	2	14485	1	0.192104	0.878702
GO:0042542	response to hydrogen peroxide	biological_process	response to stimulus	30	6349	54	14485	0.555556	0.0550989	0.878702
GO:0042546	cell wall biogenesis	biological_process	cellular component organization or biogenesis	24	6349	52	14485	0.461538	0.419434	0.878702
GO:0042547	cell wall modification involved in multidimensional cell growth	biological_process	cellular process	3	6349	4	14485	0.75	0.226076	0.878702
GO:0042594	response to starvation	biological_process	response to stimulus	11	6349	21	14485	0.52381	0.282741	0.878702
GO:0042617	paclitaxel biosynthetic process	biological_process	cellular process	1	6349	1	14485	1	0.438315	0.878702
GO:0042631	cellular response to water deprivation	biological_process	cellular process	12	6349	21	14485	0.571429	0.156227	0.878702
GO:0042732	D-xylose metabolic process	biological_process	metabolic process	6	6349	12	14485	0.5	0.440037	0.878702
GO:0042742	defense response to bacterium	biological_process	multi-organism process	111	6349	239	14485	0.464435	0.224852	0.878702
GO:0042754	negative regulation of circadian rhythm	biological_process	negative regulation of biological process	1	6349	1	14485	1	0.438315	0.878702
GO:0042761	very long-chain fatty acid biosynthetic process	biological_process	cellular process	5	6349	9	14485	0.555556	0.351197	0.878702
GO:0042779	tRNA 3'-trailer cleavage	biological_process	cellular process	1	6349	1	14485	1	0.438315	0.878702
GO:0042793	plastid transcription	biological_process	cellular process	6	6349	10	14485	0.6	0.237199	0.878702
GO:0042797	tRNA transcription by RNA polymerase III	biological_process	cellular process	3	6349	3	14485	1	0.084187	0.878702
GO:0042820	vitamin B6 catabolic process	biological_process	cellular process	1	6349	1	14485	1	0.438315	0.878702
GO:0042821	pyridoxal biosynthetic process	biological_process	cellular process	1	6349	1	14485	1	0.438315	0.878702
GO:0042823	pyridoxal phosphate biosynthetic process	biological_process	cellular process	2	6349	3	14485	0.666667	0.407936	0.878702
GO:0042882	L-arabinose transmembrane transport	biological_process	localization	1	6349	1	14485	1	0.438315	0.878702
GO:0042981	regulation of apoptotic process	biological_process	biological regulation	2	6349	3	14485	0.666667	0.407936	0.878702
GO:0042989	sequestering of actin monomers	biological_process	biological regulation	3	6349	4	14485	0.75	0.226076	0.878702
GO:0043039	tRNA aminoacylation	biological_process	cellular process	1	6349	1	14485	1	0.438315	0.878702
GO:0043067	regulation of programmed cell death	biological_process	biological regulation	11	6349	21	14485	0.52381	0.282741	0.878702
GO:0043068	positive regulation of programmed cell death	biological_process	regulation of biological process	7	6349	14	14485	0.5	0.418529	0.878702
GO:0043085	positive regulation of catalytic activity	biological_process	biological regulation	6	6349	10	14485	0.6	0.237199	0.878702
GO:0043090	amino acid import	biological_process	localization	2	6349	3	14485	0.666667	0.407936	0.878702
GO:0043111	replication fork arrest	biological_process	biological regulation	2	6349	2	14485	1	0.192104	0.878702
GO:0043137	DNA replication, removal of RNA primer	biological_process	cellular process	2	6349	2	14485	1	0.192104	0.878702
GO:0043153	entrainment of circadian clock by photoperiod	biological_process	biological regulation	1	6349	1	14485	1	0.438315	0.878702
GO:0043269	regulation of ion transport	biological_process	biological regulation	2	6349	2	14485	1	0.192104	0.878702
GO:0043392	negative regulation of DNA binding	biological_process	biological regulation	1	6349	1	14485	1	0.438315	0.878702
GO:0043447	alkane biosynthetic process	biological_process	cellular process	5	6349	9	14485	0.555556	0.351197	0.878702
GO:0043489	RNA stabilization	biological_process	biological regulation	1	6349	1	14485	1	0.438315	0.878702
GO:0043496	regulation of protein homodimerization activity	biological_process	biological regulation	1	6349	1	14485	1	0.438315	0.878702
GO:0043547	positive regulation of GTPase activity	biological_process	biological regulation	9	6349	17	14485	0.529412	0.302064	0.878702
GO:0043570	maintenance of DNA repeat elements	biological_process	cellular component organization or biogenesis	2	6349	2	14485	1	0.192104	0.878702
GO:0043609	regulation of carbon utilization	biological_process	biological regulation	2	6349	2	14485	1	0.192104	0.878702
GO:0043617	cellular response to sucrose starvation	biological_process	cellular process	4	6349	5	14485	0.8	0.119797	0.878702
GO:0043620	regulation of DNA-templated transcription in response to stress	biological_process	cellular process	1	6349	1	14485	1	0.438315	0.878702
GO:0043985	histone H4-R3 methylation	biological_process	cellular process	2	6349	3	14485	0.666667	0.407936	0.878702
GO:0043987	histone H3-S10 phosphorylation	biological_process	cellular component organization or biogenesis	1	6349	1	14485	1	0.438315	0.878702
GO:0043988	histone H3-S28 phosphorylation	biological_process	cellular component organization or biogenesis	1	6349	1	14485	1	0.438315	0.878702
GO:0044011	single-species biofilm formation on inanimate substrate	biological_process	cellular process	1	6349	1	14485	1	0.438315	0.878702
GO:0044205	'de novo' UMP biosynthetic process	biological_process	cellular process	3	6349	5	14485	0.6	0.385494	0.878702
GO:0044238	primary metabolic process	biological_process	metabolic process	1	6349	1	14485	1	0.438315	0.878702
GO:0044255	cellular lipid metabolic process	biological_process	cellular process	5	6349	8	14485	0.625	0.238458	0.878702
GO:0044403	symbiont process	biological_process	multi-organism process	3	6349	3	14485	1	0.084187	0.878702
GO:0044419	interspecies interaction between organisms	biological_process	multi-organism process	1	6349	1	14485	1	0.438315	0.878702
GO:0044458	motile cilium assembly	biological_process	cellular component organization or biogenesis	5	6349	8	14485	0.625	0.238458	0.878702
GO:0044839	cell cycle G2/M phase transition	biological_process	cellular process	2	6349	2	14485	1	0.192104	0.878702
GO:0044843	cell cycle G1/S phase transition	biological_process	cellular process	2	6349	2	14485	1	0.192104	0.878702
GO:0045003	double-strand break repair via synthesis-dependent strand annealing	biological_process	cellular process	3	6349	3	14485	1	0.084187	0.878702
GO:0045004	DNA replication proofreading	biological_process	cellular process	2	6349	2	14485	1	0.192104	0.878702
GO:0045017	glycerolipid biosynthetic process	biological_process	cellular process	3	6349	5	14485	0.6	0.385494	0.878702
GO:0045039	protein import into mitochondrial inner membrane	biological_process	localization	6	6349	9	14485	0.666667	0.148266	0.878702
GO:0045128	negative regulation of reciprocal meiotic recombination	biological_process	cellular component organization or biogenesis	2	6349	3	14485	0.666667	0.407936	0.878702
GO:0045144	meiotic sister chromatid segregation	biological_process	cellular process	1	6349	1	14485	1	0.438315	0.878702
GO:0045165	cell fate commitment	biological_process	cellular process	6	6349	9	14485	0.666667	0.148266	0.878702
GO:0045168	cell-cell signaling involved in cell fate commitment	biological_process	cellular process	1	6349	1	14485	1	0.438315	0.878702
GO:0045227	capsule polysaccharide biosynthetic process	biological_process	cellular process	3	6349	5	14485	0.6	0.385494	0.878702
GO:0045332	phospholipid translocation	biological_process	biological regulation	10	6349	15	14485	0.666667	0.0643005	0.878702
GO:0045454	cell redox homeostasis	biological_process	biological regulation	75	6349	153	14485	0.490196	0.11179	0.878702
GO:0045487	gibberellin catabolic process	biological_process	cellular process	5	6349	8	14485	0.625	0.238458	0.878702
GO:0045493	xylan catabolic process	biological_process	cellular process	10	6349	19	14485	0.526316	0.292081	0.878702
GO:0045595	regulation of cell differentiation	biological_process	biological regulation	2	6349	2	14485	1	0.192104	0.878702
GO:0045717	negative regulation of fatty acid biosynthetic process	biological_process	biological regulation	3	6349	4	14485	0.75	0.226076	0.878702
GO:0045727	positive regulation of translation	biological_process	biological regulation	6	6349	11	14485	0.545455	0.337124	0.878702
GO:0045732	positive regulation of protein catabolic process	biological_process	biological regulation	1	6349	1	14485	1	0.438315	0.878702
GO:0045737	positive regulation of cyclin-dependent protein serine/threonine kinase activity	biological_process	biological regulation	1	6349	1	14485	1	0.438315	0.878702
GO:0045740	positive regulation of DNA replication	biological_process	biological regulation	2	6349	3	14485	0.666667	0.407936	0.878702
GO:0045786	negative regulation of cell cycle	biological_process	biological regulation	3	6349	3	14485	1	0.084187	0.878702
GO:0045839	negative regulation of mitotic nuclear division	biological_process	biological regulation	3	6349	3	14485	1	0.084187	0.878702
GO:0045842	positive regulation of mitotic metaphase/anaphase transition	biological_process	biological regulation	2	6349	3	14485	0.666667	0.407936	0.878702
GO:0045876	positive regulation of sister chromatid cohesion	biological_process	biological regulation	1	6349	1	14485	1	0.438315	0.878702
GO:0045901	positive regulation of translational elongation	biological_process	cellular process	3	6349	5	14485	0.6	0.385494	0.878702
GO:0045903	positive regulation of translational fidelity	biological_process	biological regulation	4	6349	5	14485	0.8	0.119797	0.878702
GO:0045905	positive regulation of translational termination	biological_process	biological regulation	3	6349	5	14485	0.6	0.385494	0.878702
GO:0045910	negative regulation of DNA recombination	biological_process	biological regulation	9	6349	13	14485	0.692308	0.0588919	0.878702
GO:0045948	positive regulation of translational initiation	biological_process	biological regulation	3	6349	5	14485	0.6	0.385494	0.878702
GO:0046040	IMP metabolic process	biological_process	cellular process	1	6349	1	14485	1	0.438315	0.878702
GO:0046081	dUTP catabolic process	biological_process	cellular process	2	6349	3	14485	0.666667	0.407936	0.878702
GO:0046084	adenine biosynthetic process	biological_process	cellular process	1	6349	1	14485	1	0.438315	0.878702
GO:0046085	adenosine metabolic process	biological_process	cellular process	1	6349	1	14485	1	0.438315	0.878702
GO:0046104	thymidine metabolic process	biological_process	cellular process	2	6349	2	14485	1	0.192104	0.878702
GO:0046167	glycerol-3-phosphate biosynthetic process	biological_process	cellular process	1	6349	1	14485	1	0.438315	0.878702
GO:0046177	D-gluconate catabolic process	biological_process	cellular process	1	6349	1	14485	1	0.438315	0.878702
GO:0046208	spermine catabolic process	biological_process	cellular process	6	6349	8	14485	0.75	0.0779135	0.878702
GO:0046244	salicylic acid catabolic process	biological_process	biological regulation	6	6349	11	14485	0.545455	0.337124	0.878702
GO:0046256	2,4,6-trinitrotoluene catabolic process	biological_process	cellular process	1	6349	1	14485	1	0.438315	0.878702
GO:0046283	anthocyanin-containing compound metabolic process	biological_process	metabolic process	3	6349	5	14485	0.6	0.385494	0.878702
GO:0046322	negative regulation of fatty acid oxidation	biological_process	biological regulation	1	6349	1	14485	1	0.438315	0.878702
GO:0046339	diacylglycerol metabolic process	biological_process	cellular process	4	6349	7	14485	0.571429	0.367073	0.878702
GO:0046345	abscisic acid catabolic process	biological_process	metabolic process	3	6349	5	14485	0.6	0.385494	0.878702
GO:0046355	mannan catabolic process	biological_process	cellular process	7	6349	12	14485	0.583333	0.234211	0.878702
GO:0046373	L-arabinose metabolic process	biological_process	metabolic process	3	6349	5	14485	0.6	0.385494	0.878702
GO:0046467	membrane lipid biosynthetic process	biological_process	cellular process	2	6349	2	14485	1	0.192104	0.878702
GO:0046470	phosphatidylcholine metabolic process	biological_process	cellular process	8	6349	16	14485	0.5	0.399686	0.878702
GO:0046471	phosphatidylglycerol metabolic process	biological_process	cellular process	1	6349	1	14485	1	0.438315	0.878702
GO:0046475	glycerophospholipid catabolic process	biological_process	cellular process	2	6349	2	14485	1	0.192104	0.878702
GO:0046488	phosphatidylinositol metabolic process	biological_process	cellular process	2	6349	2	14485	1	0.192104	0.878702
GO:0046520	sphingoid biosynthetic process	biological_process	cellular process	2	6349	2	14485	1	0.192104	0.878702
GO:0046618	drug export	biological_process	response to stimulus	3	6349	4	14485	0.75	0.226076	0.878702
GO:0046621	negative regulation of organ growth	biological_process	biological regulation	6	6349	9	14485	0.666667	0.148266	0.878702
GO:0046622	positive regulation of organ growth	biological_process	biological regulation	3	6349	5	14485	0.6	0.385494	0.878702
GO:0046654	tetrahydrofolate biosynthetic process	biological_process	cellular process	4	6349	6	14485	0.666667	0.236241	0.878702
GO:0046677	response to antibiotic	biological_process	response to stimulus	1	6349	1	14485	1	0.438315	0.878702
GO:0046704	CDP metabolic process	biological_process	cellular process	2	6349	2	14485	1	0.192104	0.878702
GO:0046741	transport of virus in host, tissue to tissue	biological_process	localization	1	6349	1	14485	1	0.438315	0.878702
GO:0046785	microtubule polymerization	biological_process	cellular component organization or biogenesis	3	6349	5	14485	0.6	0.385494	0.878702
GO:0046834	lipid phosphorylation	biological_process	cellular process	4	6349	7	14485	0.571429	0.367073	0.878702
GO:0046855	inositol phosphate dephosphorylation	biological_process	cellular process	6	6349	11	14485	0.545455	0.337124	0.878702
GO:0046856	phosphatidylinositol dephosphorylation	biological_process	cellular process	14	6349	23	14485	0.608696	0.0757746	0.878702
GO:0046900	tetrahydrofolylpolyglutamate metabolic process	biological_process	cellular process	3	6349	3	14485	1	0.084187	0.878702
GO:0046916	cellular transition metal ion homeostasis	biological_process	biological regulation	3	6349	4	14485	0.75	0.226076	0.878702
GO:0046939	nucleotide phosphorylation	biological_process	cellular process	2	6349	2	14485	1	0.192104	0.878702
GO:0046949	fatty-acyl-CoA biosynthetic process	biological_process	cellular process	1	6349	1	14485	1	0.438315	0.878702
GO:0046951	ketone body biosynthetic process	biological_process	cellular process	2	6349	3	14485	0.666667	0.407936	0.878702
GO:0047496	vesicle transport along microtubule	biological_process	localization	1	6349	1	14485	1	0.438315	0.878702
GO:0048016	inositol phosphate-mediated signaling	biological_process	cellular process	2	6349	3	14485	0.666667	0.407936	0.878702
GO:0048194	Golgi vesicle budding	biological_process	cellular component organization or biogenesis	6	6349	9	14485	0.666667	0.148266	0.878702
GO:0048229	gametophyte development	biological_process	developmental process	10	6349	18	14485	0.555556	0.221247	0.878702
GO:0048235	pollen sperm cell differentiation	biological_process	cellular process	16	6349	30	14485	0.533333	0.192941	0.878702
GO:0048268	clathrin coat assembly	biological_process	cellular component organization or biogenesis	12	6349	22	14485	0.545455	0.211664	0.878702
GO:0048312	intracellular distribution of mitochondria	biological_process	cellular process	1	6349	1	14485	1	0.438315	0.878702
GO:0048314	embryo sac morphogenesis	biological_process	developmental process	1	6349	1	14485	1	0.438315	0.878702
GO:0048366	leaf development	biological_process	multicellular organismal process	45	6349	94	14485	0.478723	0.245161	0.878702
GO:0048367	shoot system development	biological_process	developmental process	20	6349	41	14485	0.487805	0.313416	0.878702
GO:0048437	floral organ development	biological_process	developmental process	5	6349	9	14485	0.555556	0.351197	0.878702
GO:0048438	floral whorl development	biological_process	developmental process	2	6349	2	14485	1	0.192104	0.878702
GO:0048440	carpel development	biological_process	multicellular organismal process	8	6349	13	14485	0.615385	0.156892	0.878702
GO:0048441	petal development	biological_process	developmental process	6	6349	11	14485	0.545455	0.337124	0.878702
GO:0048442	sepal development	biological_process	developmental process	2	6349	3	14485	0.666667	0.407936	0.878702
GO:0048448	stamen morphogenesis	biological_process	developmental process	2	6349	3	14485	0.666667	0.407936	0.878702
GO:0048453	sepal formation	biological_process	developmental process	1	6349	1	14485	1	0.438315	0.878702
GO:0048478	replication fork protection	biological_process	biological regulation	1	6349	1	14485	1	0.438315	0.878702
GO:0048479	style development	biological_process	reproduction	2	6349	3	14485	0.666667	0.407936	0.878702
GO:0048497	maintenance of floral organ identity	biological_process	biological regulation	6	6349	9	14485	0.666667	0.148266	0.878702
GO:0048498	establishment of petal orientation	biological_process	developmental process	2	6349	2	14485	1	0.192104	0.878702
GO:0048509	regulation of meristem development	biological_process	developmental process	4	6349	6	14485	0.666667	0.236241	0.878702
GO:0048511	rhythmic process	biological_process	rhythmic process	10	6349	20	14485	0.5	0.367691	0.878702
GO:0048544	recognition of pollen	biological_process	cellular process	33	6349	64	14485	0.515625	0.130917	0.878702
GO:0048653	anther development	biological_process	developmental process	15	6349	32	14485	0.46875	0.430238	0.878702
GO:0048655	anther wall tapetum morphogenesis	biological_process	developmental process	1	6349	1	14485	1	0.438315	0.878702
GO:0048825	cotyledon development	biological_process	developmental process	13	6349	22	14485	0.590909	0.11003	0.878702
GO:0048834	specification of petal number	biological_process	developmental process	1	6349	1	14485	1	0.438315	0.878702
GO:0048838	release of seed from dormancy	biological_process	reproduction	1	6349	1	14485	1	0.438315	0.878702
GO:0048856	anatomical structure development	biological_process	developmental process	1	6349	1	14485	1	0.438315	0.878702
GO:0050000	chromosome localization	biological_process	localization	1	6349	1	14485	1	0.438315	0.878702
GO:0050665	hydrogen peroxide biosynthetic process	biological_process	cellular process	6	6349	8	14485	0.75	0.0779135	0.878702
GO:0050776	regulation of immune response	biological_process	biological regulation	1	6349	1	14485	1	0.438315	0.878702
GO:0050790	regulation of catalytic activity	biological_process	biological regulation	5	6349	8	14485	0.625	0.238458	0.878702
GO:0050821	protein stabilization	biological_process	biological regulation	10	6349	17	14485	0.588235	0.158209	0.878702
GO:0050992	dimethylallyl diphosphate biosynthetic process	biological_process	cellular process	1	6349	1	14485	1	0.438315	0.878702
GO:0051026	chiasma assembly	biological_process	cellular component organization or biogenesis	7	6349	11	14485	0.636364	0.153929	0.878702
GO:0051028	mRNA transport	biological_process	localization	24	6349	50	14485	0.48	0.324056	0.878702
GO:0051050	positive regulation of transport	biological_process	biological regulation	1	6349	1	14485	1	0.438315	0.878702
GO:0051070	galactomannan biosynthetic process	biological_process	metabolic process	2	6349	3	14485	0.666667	0.407936	0.878702
GO:0051083	'de novo' cotranslational protein folding	biological_process	cellular process	2	6349	2	14485	1	0.192104	0.878702
GO:0051209	release of sequestered calcium ion into cytosol	biological_process	biological regulation	3	6349	4	14485	0.75	0.226076	0.878702
GO:0051224	negative regulation of protein transport	biological_process	localization	1	6349	1	14485	1	0.438315	0.878702
GO:0051225	spindle assembly	biological_process	cellular component organization or biogenesis	14	6349	25	14485	0.56	0.152611	0.878702
GO:0051246	regulation of protein metabolic process	biological_process	biological regulation	1	6349	1	14485	1	0.438315	0.878702
GO:0051262	protein tetramerization	biological_process	cellular component organization or biogenesis	1	6349	1	14485	1	0.438315	0.878702
GO:0051289	protein homotetramerization	biological_process	cellular component organization or biogenesis	8	6349	16	14485	0.5	0.399686	0.878702
GO:0051291	protein heterooligomerization	biological_process	cellular component organization or biogenesis	1	6349	1	14485	1	0.438315	0.878702
GO:0051302	regulation of cell division	biological_process	biological regulation	11	6349	19	14485	0.578947	0.157497	0.878702
GO:0051304	chromosome separation	biological_process	cellular process	2	6349	2	14485	1	0.192104	0.878702
GO:0051306	mitotic sister chromatid separation	biological_process	cellular component organization or biogenesis	1	6349	1	14485	1	0.438315	0.878702
GO:0051307	meiotic chromosome separation	biological_process	cellular component organization or biogenesis	3	6349	3	14485	1	0.084187	0.878702
GO:0051315	attachment of mitotic spindle microtubules to kinetochore	biological_process	cellular component organization or biogenesis	3	6349	5	14485	0.6	0.385494	0.878702
GO:0051382	kinetochore assembly	biological_process	cellular component organization or biogenesis	2	6349	3	14485	0.666667	0.407936	0.878702
GO:0051391	tRNA acetylation	biological_process	cellular process	1	6349	1	14485	1	0.438315	0.878702
GO:0051418	microtubule nucleation by microtubule organizing center	biological_process	cellular component organization or biogenesis	2	6349	2	14485	1	0.192104	0.878702
GO:0051453	regulation of intracellular pH	biological_process	biological regulation	8	6349	14	14485	0.571429	0.230305	0.878702
GO:0051503	adenine nucleotide transport	biological_process	localization	1	6349	1	14485	1	0.438315	0.878702
GO:0051555	flavonol biosynthetic process	biological_process	metabolic process	2	6349	3	14485	0.666667	0.407936	0.878702
GO:0051567	histone H3-K9 methylation	biological_process	cellular component organization or biogenesis	4	6349	6	14485	0.666667	0.236241	0.878702
GO:0051568	histone H3-K4 methylation	biological_process	cellular component organization or biogenesis	6	6349	11	14485	0.545455	0.337124	0.878702
GO:0051570	regulation of histone H3-K9 methylation	biological_process	cellular component organization or biogenesis	2	6349	3	14485	0.666667	0.407936	0.878702
GO:0051574	positive regulation of histone H3-K9 methylation	biological_process	biological regulation	2	6349	2	14485	1	0.192104	0.878702
GO:0051639	actin filament network formation	biological_process	cellular component organization or biogenesis	3	6349	5	14485	0.6	0.385494	0.878702
GO:0051641	cellular localization	biological_process	localization	1	6349	1	14485	1	0.438315	0.878702
GO:0051701	interaction with host	biological_process	multi-organism process	1	6349	1	14485	1	0.438315	0.878702
GO:0051726	regulation of cell cycle	biological_process	biological regulation	17	6349	31	14485	0.548387	0.145764	0.878702
GO:0051754	meiotic sister chromatid cohesion, centromeric	biological_process	reproduction	3	6349	4	14485	0.75	0.226076	0.878702
GO:0051775	response to redox state	biological_process	response to stimulus	2	6349	2	14485	1	0.192104	0.878702
GO:0051782	negative regulation of cell division	biological_process	biological regulation	5	6349	8	14485	0.625	0.238458	0.878702
GO:0051783	regulation of nuclear division	biological_process	biological regulation	2	6349	2	14485	1	0.192104	0.878702
GO:0051792	medium-chain fatty acid biosynthetic process	biological_process	cellular process	2	6349	2	14485	1	0.192104	0.878702
GO:0051793	medium-chain fatty acid catabolic process	biological_process	cellular process	1	6349	1	14485	1	0.438315	0.878702
GO:0051924	regulation of calcium ion transport	biological_process	biological regulation	1	6349	1	14485	1	0.438315	0.878702
GO:0051938	L-glutamate import	biological_process	localization	3	6349	4	14485	0.75	0.226076	0.878702
GO:0051983	regulation of chromosome segregation	biological_process	biological regulation	1	6349	1	14485	1	0.438315	0.878702
GO:0052096	formation by symbiont of syncytium involving giant cell for nutrient acquisition from host	biological_process	developmental process	3	6349	3	14485	1	0.084187	0.878702
GO:0052386	cell wall thickening	biological_process	cellular component organization or biogenesis	2	6349	3	14485	0.666667	0.407936	0.878702
GO:0052542	defense response by callose deposition	biological_process	localization	2	6349	2	14485	1	0.192104	0.878702
GO:0052543	callose deposition in cell wall	biological_process	cellular component organization or biogenesis	3	6349	3	14485	1	0.084187	0.878702
GO:0052545	callose localization	biological_process	localization	2	6349	2	14485	1	0.192104	0.878702
GO:0052889	9,9'-di-cis-zeta-carotene desaturation to 7,9,7',9'-tetra-cis-lycopene	biological_process	cellular process	1	6349	1	14485	1	0.438315	0.878702
GO:0055062	phosphate ion homeostasis	biological_process	biological regulation	9	6349	15	14485	0.6	0.158127	0.878702
GO:0055068	cobalt ion homeostasis	biological_process	biological regulation	1	6349	1	14485	1	0.438315	0.878702
GO:0055069	zinc ion homeostasis	biological_process	biological regulation	3	6349	5	14485	0.6	0.385494	0.878702
GO:0060149	negative regulation of posttranscriptional gene silencing	biological_process	biological regulation	3	6349	5	14485	0.6	0.385494	0.878702
GO:0060178	regulation of exocyst localization	biological_process	biological regulation	1	6349	1	14485	1	0.438315	0.878702
GO:0060250	germ-line stem-cell niche homeostasis	biological_process	biological regulation	1	6349	1	14485	1	0.438315	0.878702
GO:0060261	positive regulation of transcription initiation from RNA polymerase II promoter	biological_process	metabolic process	2	6349	2	14485	1	0.192104	0.878702
GO:0060416	response to growth hormone	biological_process	response to stimulus	2	6349	3	14485	0.666667	0.407936	0.878702
GO:0060567	negative regulation of DNA-templated transcription, termination	biological_process	biological regulation	2	6349	2	14485	1	0.192104	0.878702
GO:0060918	auxin transport	biological_process	biological regulation	6	6349	9	14485	0.666667	0.148266	0.878702
GO:0060919	auxin influx	biological_process	biological regulation	4	6349	7	14485	0.571429	0.367073	0.878702
GO:0061062	regulation of nematode larval development	biological_process	biological regulation	2	6349	2	14485	1	0.192104	0.878702
GO:0061077	chaperone-mediated protein folding	biological_process	cellular process	9	6349	15	14485	0.6	0.158127	0.878702
GO:0061408	positive regulation of transcription from RNA polymerase II promoter in response to heat stress	biological_process	cellular process	11	6349	22	14485	0.5	0.353817	0.878702
GO:0061820	telomeric D-loop disassembly	biological_process	biological regulation	2	6349	3	14485	0.666667	0.407936	0.878702
GO:0062034	L-pipecolic acid biosynthetic process	biological_process	cellular process	4	6349	6	14485	0.666667	0.236241	0.878702
GO:0065003	protein-containing complex assembly	biological_process	cellular component organization or biogenesis	1	6349	1	14485	1	0.438315	0.878702
GO:0065004	protein-DNA complex assembly	biological_process	cellular component organization or biogenesis	2	6349	3	14485	0.666667	0.407936	0.878702
GO:0070131	positive regulation of mitochondrial translation	biological_process	biological regulation	2	6349	2	14485	1	0.192104	0.878702
GO:0070192	chromosome organization involved in meiotic cell cycle	biological_process	cellular process	2	6349	3	14485	0.666667	0.407936	0.878702
GO:0070197	meiotic attachment of telomere to nuclear envelope	biological_process	cellular component organization or biogenesis	1	6349	1	14485	1	0.438315	0.878702
GO:0070212	protein poly-ADP-ribosylation	biological_process	cellular process	3	6349	5	14485	0.6	0.385494	0.878702
GO:0070407	oxidation-dependent protein catabolic process	biological_process	cellular process	1	6349	1	14485	1	0.438315	0.878702
GO:0070413	trehalose metabolism in response to stress	biological_process	cellular process	2	6349	3	14485	0.666667	0.407936	0.878702
GO:0070417	cellular response to cold	biological_process	cellular process	12	6349	21	14485	0.571429	0.156227	0.878702
GO:0070476	rRNA (guanine-N7)-methylation	biological_process	cellular component organization or biogenesis	2	6349	2	14485	1	0.192104	0.878702
GO:0070544	histone H3-K36 demethylation	biological_process	cellular component organization or biogenesis	1	6349	1	14485	1	0.438315	0.878702
GO:0070574	cadmium ion transmembrane transport	biological_process	localization	1	6349	1	14485	1	0.438315	0.878702
GO:0070588	calcium ion transmembrane transport	biological_process	localization	7	6349	14	14485	0.5	0.418529	0.878702
GO:0070647	protein modification by small protein conjugation or removal	biological_process	cellular process	6	6349	10	14485	0.6	0.237199	0.878702
GO:0070681	glutaminyl-tRNAGln biosynthesis via transamidation	biological_process	metabolic process	3	6349	5	14485	0.6	0.385494	0.878702
GO:0070716	mismatch repair involved in maintenance of fidelity involved in DNA-dependent DNA replication	biological_process	metabolic process	1	6349	1	14485	1	0.438315	0.878702
GO:0070734	histone H3-K27 methylation	biological_process	cellular component organization or biogenesis	2	6349	2	14485	1	0.192104	0.878702
GO:0070813	hydrogen sulfide metabolic process	biological_process	cellular process	2	6349	2	14485	1	0.192104	0.878702
GO:0070828	heterochromatin organization	biological_process	cellular component organization or biogenesis	1	6349	1	14485	1	0.438315	0.878702
GO:0070981	L-asparagine biosynthetic process	biological_process	cellular process	1	6349	1	14485	1	0.438315	0.878702
GO:0071033	nuclear retention of pre-mRNA at the site of transcription	biological_process	localization	1	6349	1	14485	1	0.438315	0.878702
GO:0071034	CUT catabolic process	biological_process	cellular process	2	6349	2	14485	1	0.192104	0.878702
GO:0071035	nuclear polyadenylation-dependent rRNA catabolic process	biological_process	cellular process	5	6349	7	14485	0.714286	0.138118	0.878702
GO:0071038	nuclear polyadenylation-dependent tRNA catabolic process	biological_process	cellular process	4	6349	5	14485	0.8	0.119797	0.878702
GO:0071042	nuclear polyadenylation-dependent mRNA catabolic process	biological_process	biological regulation	4	6349	5	14485	0.8	0.119797	0.878702
GO:0071049	nuclear retention of pre-mRNA with aberrant 3'-ends at the site of transcription	biological_process	biological regulation	2	6349	2	14485	1	0.192104	0.878702
GO:0071051	polyadenylation-dependent snoRNA 3'-end processing	biological_process	cellular process	5	6349	6	14485	0.833333	0.0615752	0.878702
GO:0071158	positive regulation of cell cycle arrest	biological_process	biological regulation	4	6349	5	14485	0.8	0.119797	0.878702
GO:0071163	DNA replication preinitiation complex assembly	biological_process	cellular component organization or biogenesis	3	6349	3	14485	1	0.084187	0.878702
GO:0071211	protein targeting to vacuole involved in autophagy	biological_process	cellular process	1	6349	1	14485	1	0.438315	0.878702
GO:0071215	cellular response to abscisic acid stimulus	biological_process	cellular process	12	6349	25	14485	0.48	0.41061	0.878702
GO:0071248	cellular response to metal ion	biological_process	cellular process	1	6349	1	14485	1	0.438315	0.878702
GO:0071249	cellular response to nitrate	biological_process	cellular process	8	6349	14	14485	0.571429	0.230305	0.878702
GO:0071280	cellular response to copper ion	biological_process	cellular process	1	6349	1	14485	1	0.438315	0.878702
GO:0071281	cellular response to iron ion	biological_process	cellular process	15	6349	27	14485	0.555556	0.150458	0.878702
GO:0071286	cellular response to magnesium ion	biological_process	response to stimulus	1	6349	1	14485	1	0.438315	0.878702
GO:0071325	cellular response to mannitol stimulus	biological_process	response to stimulus	1	6349	1	14485	1	0.438315	0.878702
GO:0071329	cellular response to sucrose stimulus	biological_process	response to stimulus	3	6349	3	14485	1	0.084187	0.878702
GO:0071332	cellular response to fructose stimulus	biological_process	cellular process	1	6349	1	14485	1	0.438315	0.878702
GO:0071344	diphosphate metabolic process	biological_process	cellular process	2	6349	3	14485	0.666667	0.407936	0.878702
GO:0071367	cellular response to brassinosteroid stimulus	biological_process	cellular process	2	6349	2	14485	1	0.192104	0.878702
GO:0071369	cellular response to ethylene stimulus	biological_process	cellular process	9	6349	15	14485	0.6	0.158127	0.878702
GO:0071395	cellular response to jasmonic acid stimulus	biological_process	cellular process	5	6349	7	14485	0.714286	0.138118	0.878702
GO:0071446	cellular response to salicylic acid stimulus	biological_process	cellular process	3	6349	4	14485	0.75	0.226076	0.878702
GO:0071461	cellular response to redox state	biological_process	response to stimulus	2	6349	2	14485	1	0.192104	0.878702
GO:0071462	cellular response to water stimulus	biological_process	cellular process	1	6349	1	14485	1	0.438315	0.878702
GO:0071465	cellular response to desiccation	biological_process	cellular process	4	6349	6	14485	0.666667	0.236241	0.878702
GO:0071482	cellular response to light stimulus	biological_process	cellular process	7	6349	10	14485	0.7	0.0889772	0.878702
GO:0071485	cellular response to absence of light	biological_process	cellular process	3	6349	4	14485	0.75	0.226076	0.878702
GO:0071491	cellular response to red light	biological_process	cellular process	1	6349	1	14485	1	0.438315	0.878702
GO:0071492	cellular response to UV-A	biological_process	response to stimulus	2	6349	2	14485	1	0.192104	0.878702
GO:0071669	plant-type cell wall organization or biogenesis	biological_process	cellular process	7	6349	10	14485	0.7	0.0889772	0.878702
GO:0071731	response to nitric oxide	biological_process	response to stimulus	2	6349	2	14485	1	0.192104	0.878702
GO:0071836	nectar secretion	biological_process	localization	2	6349	2	14485	1	0.192104	0.878702
GO:0071897	DNA biosynthetic process	biological_process	cellular process	4	6349	6	14485	0.666667	0.236241	0.878702
GO:0072321	chaperone-mediated protein transport	biological_process	localization	2	6349	3	14485	0.666667	0.407936	0.878702
GO:0072355	histone H3-T3 phosphorylation	biological_process	cellular component organization or biogenesis	1	6349	1	14485	1	0.438315	0.878702
GO:0072423	response to DNA damage checkpoint signaling	biological_process	response to stimulus	1	6349	1	14485	1	0.438315	0.878702
GO:0072428	signal transduction involved in intra-S DNA damage checkpoint	biological_process	regulation of biological process	1	6349	1	14485	1	0.438315	0.878702
GO:0072488	ammonium transmembrane transport	biological_process	localization	3	6349	3	14485	1	0.084187	0.878702
GO:0072583	clathrin-dependent endocytosis	biological_process	localization	17	6349	34	14485	0.5	0.288851	0.878702
GO:0072659	protein localization to plasma membrane	biological_process	localization	4	6349	5	14485	0.8	0.119797	0.878702
GO:0072709	cellular response to sorbitol	biological_process	cellular process	1	6349	1	14485	1	0.438315	0.878702
GO:0080024	indolebutyric acid metabolic process	biological_process	biological regulation	2	6349	2	14485	1	0.192104	0.878702
GO:0080026	response to indolebutyric acid	biological_process	response to stimulus	1	6349	1	14485	1	0.438315	0.878702
GO:0080037	negative regulation of cytokinin-activated signaling pathway	biological_process	biological regulation	3	6349	4	14485	0.75	0.226076	0.878702
GO:0080060	integument development	biological_process	developmental process	2	6349	3	14485	0.666667	0.407936	0.878702
GO:0080088	spermidine hydroxycinnamate conjugate biosynthetic process	biological_process	cellular process	1	6349	1	14485	1	0.438315	0.878702
GO:0080092	regulation of pollen tube growth	biological_process	biological regulation	20	6349	38	14485	0.526316	0.175748	0.878702
GO:0080093	regulation of photorespiration	biological_process	biological regulation	2	6349	2	14485	1	0.192104	0.878702
GO:0080142	regulation of salicylic acid biosynthetic process	biological_process	biological regulation	7	6349	13	14485	0.538462	0.324417	0.878702
GO:0080144	amino acid homeostasis	biological_process	biological regulation	3	6349	5	14485	0.6	0.385494	0.878702
GO:0080148	negative regulation of response to water deprivation	biological_process	biological regulation	9	6349	14	14485	0.642857	0.101831	0.878702
GO:0080153	negative regulation of reductive pentose-phosphate cycle	biological_process	biological regulation	2	6349	3	14485	0.666667	0.407936	0.878702
GO:0080155	regulation of double fertilization forming a zygote and endosperm	biological_process	biological regulation	3	6349	4	14485	0.75	0.226076	0.878702
GO:0080156	mitochondrial mRNA modification	biological_process	cellular process	18	6349	35	14485	0.514286	0.230016	0.878702
GO:0080163	regulation of protein serine/threonine phosphatase activity	biological_process	biological regulation	9	6349	16	14485	0.5625	0.225905	0.878702
GO:0080164	regulation of nitric oxide metabolic process	biological_process	biological regulation	1	6349	1	14485	1	0.438315	0.878702
GO:0080165	callose deposition in phloem sieve plate	biological_process	localization	2	6349	2	14485	1	0.192104	0.878702
GO:0080168	abscisic acid transport	biological_process	localization	3	6349	5	14485	0.6	0.385494	0.878702
GO:0080169	cellular response to boron-containing substance deprivation	biological_process	cellular process	3	6349	3	14485	1	0.084187	0.878702
GO:0080175	phragmoplast microtubule organization	biological_process	cellular component organization or biogenesis	3	6349	4	14485	0.75	0.226076	0.878702
GO:0080177	plastoglobule organization	biological_process	cellular component organization or biogenesis	4	6349	5	14485	0.8	0.119797	0.878702
GO:0080186	developmental vegetative growth	biological_process	developmental process	4	6349	6	14485	0.666667	0.236241	0.878702
GO:0080187	floral organ senescence	biological_process	developmental process	3	6349	3	14485	1	0.084187	0.878702
GO:0090042	tubulin deacetylation	biological_process	cellular process	1	6349	1	14485	1	0.438315	0.878702
GO:0090058	metaxylem development	biological_process	developmental process	3	6349	4	14485	0.75	0.226076	0.878702
GO:0090063	positive regulation of microtubule nucleation	biological_process	biological regulation	2	6349	2	14485	1	0.192104	0.878702
GO:0090155	negative regulation of sphingolipid biosynthetic process	biological_process	biological regulation	2	6349	3	14485	0.666667	0.407936	0.878702
GO:0090228	positive regulation of red or far-red light signaling pathway	biological_process	biological regulation	1	6349	1	14485	1	0.438315	0.878702
GO:0090241	negative regulation of histone H4 acetylation	biological_process	biological regulation	2	6349	2	14485	1	0.192104	0.878702
GO:0090333	regulation of stomatal closure	biological_process	biological regulation	15	6349	28	14485	0.535714	0.1975	0.878702
GO:0090355	positive regulation of auxin metabolic process	biological_process	cellular process	1	6349	1	14485	1	0.438315	0.878702
GO:0090358	positive regulation of tryptophan metabolic process	biological_process	biological regulation	1	6349	1	14485	1	0.438315	0.878702
GO:0090377	seed trichome initiation	biological_process	cellular process	1	6349	1	14485	1	0.438315	0.878702
GO:0090414	molybdate ion export from vacuole	biological_process	localization	1	6349	1	14485	1	0.438315	0.878702
GO:0090428	perianth development	biological_process	developmental process	2	6349	2	14485	1	0.192104	0.878702
GO:0090435	protein localization to nuclear envelope	biological_process	localization	1	6349	1	14485	1	0.438315	0.878702
GO:0090449	phloem glucosinolate loading	biological_process	localization	2	6349	3	14485	0.666667	0.407936	0.878702
GO:0090548	response to nitrate starvation	biological_process	response to stimulus	3	6349	3	14485	1	0.084187	0.878702
GO:0090610	bundle sheath cell fate specification	biological_process	cellular process	1	6349	1	14485	1	0.438315	0.878702
GO:0090626	plant epidermis morphogenesis	biological_process	developmental process	1	6349	1	14485	1	0.438315	0.878702
GO:0090627	plant epidermal cell differentiation	biological_process	cellular process	4	6349	5	14485	0.8	0.119797	0.878702
GO:0090657	telomeric loop disassembly	biological_process	cellular component organization or biogenesis	1	6349	1	14485	1	0.438315	0.878702
GO:0090691	formation of plant organ boundary	biological_process	developmental process	3	6349	4	14485	0.75	0.226076	0.878702
GO:0090696	post-embryonic plant organ development	biological_process	developmental process	2	6349	2	14485	1	0.192104	0.878702
GO:0090697	post-embryonic plant organ morphogenesis	biological_process	developmental process	4	6349	7	14485	0.571429	0.367073	0.878702
GO:0090708	specification of plant organ axis polarity	biological_process	developmental process	3	6349	5	14485	0.6	0.385494	0.878702
GO:0097054	L-glutamate biosynthetic process	biological_process	biological regulation	2	6349	2	14485	1	0.192104	0.878702
GO:0097056	selenocysteinyl-tRNA(Sec) biosynthetic process	biological_process	cellular process	2	6349	2	14485	1	0.192104	0.878702
GO:0097164	ammonium ion metabolic process	biological_process	metabolic process	1	6349	1	14485	1	0.438315	0.878702
GO:0097237	cellular response to toxic substance	biological_process	cellular process	3	6349	3	14485	1	0.084187	0.878702
GO:0097275	cellular ammonia homeostasis	biological_process	biological regulation	1	6349	1	14485	1	0.438315	0.878702
GO:0097295	morphine biosynthetic process	biological_process	cellular process	2	6349	3	14485	0.666667	0.407936	0.878702
GO:0097339	glycolate transmembrane transport	biological_process	localization	1	6349	1	14485	1	0.438315	0.878702
GO:0097428	protein maturation by iron-sulfur cluster transfer	biological_process	metabolic process	6	6349	9	14485	0.666667	0.148266	0.878702
GO:0097510	base-excision repair, AP site formation via deaminated base removal	biological_process	cellular process	1	6349	1	14485	1	0.438315	0.878702
GO:0097552	mitochondrial double-strand break repair via homologous recombination	biological_process	cellular process	1	6349	1	14485	1	0.438315	0.878702
GO:0097623	potassium ion export across plasma membrane	biological_process	cellular process	1	6349	1	14485	1	0.438315	0.878702
GO:0098504	DNA 3' dephosphorylation involved in DNA repair	biological_process	cellular process	1	6349	1	14485	1	0.438315	0.878702
GO:0098542	defense response to other organism	biological_process	multi-organism process	2	6349	3	14485	0.666667	0.407936	0.878702
GO:0098586	cellular response to virus	biological_process	multi-organism process	1	6349	1	14485	1	0.438315	0.878702
GO:0098702	adenine import across plasma membrane	biological_process	localization	2	6349	2	14485	1	0.192104	0.878702
GO:0098710	guanine import across plasma membrane	biological_process	localization	2	6349	2	14485	1	0.192104	0.878702
GO:0098721	uracil import across plasma membrane	biological_process	localization	2	6349	2	14485	1	0.192104	0.878702
GO:0098754	detoxification	biological_process	detoxification	1	6349	1	14485	1	0.438315	0.878702
GO:0098755	maintenance of seed dormancy by absisic acid	biological_process	developmental process	2	6349	2	14485	1	0.192104	0.878702
GO:0101030	tRNA-guanine transglycosylation	biological_process	cellular process	2	6349	3	14485	0.666667	0.407936	0.878702
GO:0106146	sideretin biosynthesis	biological_process	cellular process	4	6349	5	14485	0.8	0.119797	0.878702
GO:0106147	fraxetin biosynthesis	biological_process	cellular process	1	6349	1	14485	1	0.438315	0.878702
GO:0120029	proton export across plasma membrane	biological_process	localization	6	6349	8	14485	0.75	0.0779135	0.878702
GO:0140021	mitochondrial ADP transmembrane transport	biological_process	localization	1	6349	1	14485	1	0.438315	0.878702
GO:0140042	lipid droplet formation	biological_process	biological regulation	3	6349	3	14485	1	0.084187	0.878702
GO:1900034	regulation of cellular response to heat	biological_process	biological regulation	1	6349	1	14485	1	0.438315	0.878702
GO:1900057	positive regulation of leaf senescence	biological_process	biological regulation	13	6349	21	14485	0.619048	0.0740071	0.878702
GO:1900060	negative regulation of ceramide biosynthetic process	biological_process	biological regulation	2	6349	3	14485	0.666667	0.407936	0.878702
GO:1900109	regulation of histone H3-K9 dimethylation	biological_process	biological regulation	1	6349	1	14485	1	0.438315	0.878702
GO:1900233	positive regulation of single-species biofilm formation on inanimate substrate	biological_process	multi-organism process	1	6349	1	14485	1	0.438315	0.878702
GO:1900366	negative regulation of defense response to insect	biological_process	biological regulation	1	6349	1	14485	1	0.438315	0.878702
GO:1900367	positive regulation of defense response to insect	biological_process	biological regulation	4	6349	7	14485	0.571429	0.367073	0.878702
GO:1900424	regulation of defense response to bacterium	biological_process	biological regulation	6	6349	10	14485	0.6	0.237199	0.878702
GO:1900426	positive regulation of defense response to bacterium	biological_process	biological regulation	15	6349	30	14485	0.5	0.307785	0.878702
GO:1900433	positive regulation of filamentous growth of a population of unicellular organisms in response to heat	biological_process	biological regulation	1	6349	1	14485	1	0.438315	0.878702
GO:1900442	positive regulation of filamentous growth of a population of unicellular organisms in response to neutral pH	biological_process	biological regulation	1	6349	1	14485	1	0.438315	0.878702
GO:1900994	(-)-secologanin biosynthetic process	biological_process	cellular process	5	6349	9	14485	0.555556	0.351197	0.878702
GO:1901010	(S)-reticuline metabolic process	biological_process	cellular process	3	6349	4	14485	0.75	0.226076	0.878702
GO:1901012	(S)-reticuline biosynthetic process	biological_process	cellular process	1	6349	1	14485	1	0.438315	0.878702
GO:1901031	regulation of response to reactive oxygen species	biological_process	biological regulation	2	6349	2	14485	1	0.192104	0.878702
GO:1901038	cyanidin 3-O-glucoside metabolic process	biological_process	metabolic process	2	6349	3	14485	0.666667	0.407936	0.878702
GO:1901141	regulation of lignin biosynthetic process	biological_process	cellular process	2	6349	2	14485	1	0.192104	0.878702
GO:1901177	lycopene biosynthetic process	biological_process	cellular process	2	6349	2	14485	1	0.192104	0.878702
GO:1901181	negative regulation of cellular response to caffeine	biological_process	biological regulation	3	6349	3	14485	1	0.084187	0.878702
GO:1901347	negative regulation of secondary cell wall biogenesis	biological_process	biological regulation	2	6349	2	14485	1	0.192104	0.878702
GO:1901349	glucosinolate transport	biological_process	localization	2	6349	3	14485	0.666667	0.407936	0.878702
GO:1901371	regulation of leaf morphogenesis	biological_process	biological regulation	6	6349	11	14485	0.545455	0.337124	0.878702
GO:1901401	regulation of tetrapyrrole metabolic process	biological_process	biological regulation	1	6349	1	14485	1	0.438315	0.878702
GO:1901407	regulation of phosphorylation of RNA polymerase II C-terminal domain	biological_process	biological regulation	2	6349	3	14485	0.666667	0.407936	0.878702
GO:1901528	hydrogen peroxide mediated signaling pathway involved in stomatal movement	biological_process	biological regulation	2	6349	3	14485	0.666667	0.407936	0.878702
GO:1901537	positive regulation of DNA demethylation	biological_process	biological regulation	3	6349	4	14485	0.75	0.226076	0.878702
GO:1901562	response to paraquat	biological_process	response to stimulus	3	6349	3	14485	1	0.084187	0.878702
GO:1901601	strigolactone biosynthetic process	biological_process	biological regulation	3	6349	4	14485	0.75	0.226076	0.878702
GO:1901651	regulation of mitotic chromosome decondensation	biological_process	biological regulation	1	6349	1	14485	1	0.438315	0.878702
GO:1901812	beta-carotene biosynthetic process	biological_process	cellular process	1	6349	1	14485	1	0.438315	0.878702
GO:1901868	ecgonine methyl ester catabolic process	biological_process	cellular process	1	6349	1	14485	1	0.438315	0.878702
GO:1901869	ecgonine methyl ester biosynthetic process	biological_process	cellular process	1	6349	1	14485	1	0.438315	0.878702
GO:1901871	ecgonone methyl ester catabolic process	biological_process	cellular process	1	6349	1	14485	1	0.438315	0.878702
GO:1901872	ecgonone methyl ester biosynthetic process	biological_process	cellular process	1	6349	1	14485	1	0.438315	0.878702
GO:1901959	positive regulation of cutin biosynthetic process	biological_process	biological regulation	3	6349	5	14485	0.6	0.385494	0.878702
GO:1901975	glycerate transmembrane transport	biological_process	localization	1	6349	1	14485	1	0.438315	0.878702
GO:1901997	negative regulation of indoleacetic acid biosynthetic process via tryptophan	biological_process	biological regulation	1	6349	1	14485	1	0.438315	0.878702
GO:1902025	nitrate import	biological_process	localization	3	6349	3	14485	1	0.084187	0.878702
GO:1902074	response to salt	biological_process	response to stimulus	13	6349	23	14485	0.565217	0.154561	0.878702
GO:1902075	cellular response to salt	biological_process	cellular process	4	6349	5	14485	0.8	0.119797	0.878702
GO:1902171	regulation of tocopherol cyclase activity	biological_process	biological regulation	3	6349	4	14485	0.75	0.226076	0.878702
GO:1902182	shoot apical meristem development	biological_process	developmental process	2	6349	3	14485	0.666667	0.407936	0.878702
GO:1902184	negative regulation of shoot apical meristem development	biological_process	biological regulation	1	6349	1	14485	1	0.438315	0.878702
GO:1902196	isovaleryl-CoA(4-) catabolic process	biological_process	cellular process	1	6349	1	14485	1	0.438315	0.878702
GO:1902198	3-methylbut-2-enoyl-CoA(4-) metabolic process	biological_process	cellular process	1	6349	1	14485	1	0.438315	0.878702
GO:1902265	abscisic acid homeostasis	biological_process	biological regulation	2	6349	2	14485	1	0.192104	0.878702
GO:1902290	positive regulation of defense response to oomycetes	biological_process	biological regulation	8	6349	14	14485	0.571429	0.230305	0.878702
GO:1902334	fructose export from vacuole to cytoplasm	biological_process	localization	1	6349	1	14485	1	0.438315	0.878702
GO:1902347	response to strigolactone	biological_process	response to stimulus	1	6349	1	14485	1	0.438315	0.878702
GO:1902348	cellular response to strigolactone	biological_process	cellular process	1	6349	1	14485	1	0.438315	0.878702
GO:1902395	regulation of 1-deoxy-D-xylulose-5-phosphate synthase activity	biological_process	biological regulation	2	6349	2	14485	1	0.192104	0.878702
GO:1902448	positive regulation of shade avoidance	biological_process	biological regulation	1	6349	1	14485	1	0.438315	0.878702
GO:1902479	positive regulation of defense response to bacterium, incompatible interaction	biological_process	biological regulation	3	6349	4	14485	0.75	0.226076	0.878702
GO:1902600	proton transmembrane transport	biological_process	localization	17	6349	36	14485	0.472222	0.401924	0.878702
GO:1902609	(R)-2-hydroxy-alpha-linolenic acid biosynthetic process	biological_process	cellular process	1	6349	1	14485	1	0.438315	0.878702
GO:1902749	regulation of cell cycle G2/M phase transition	biological_process	biological regulation	1	6349	1	14485	1	0.438315	0.878702
GO:1902884	positive regulation of response to oxidative stress	biological_process	biological regulation	2	6349	2	14485	1	0.192104	0.878702
GO:1902975	mitotic DNA replication initiation	biological_process	metabolic process	2	6349	2	14485	1	0.192104	0.878702
GO:1902981	synthesis of RNA primer involved in mitotic DNA replication	biological_process	cellular process	2	6349	2	14485	1	0.192104	0.878702
GO:1903052	positive regulation of proteolysis involved in cellular protein catabolic process	biological_process	biological regulation	1	6349	1	14485	1	0.438315	0.878702
GO:1903086	negative regulation of sinapate ester biosynthetic process	biological_process	cellular process	1	6349	1	14485	1	0.438315	0.878702
GO:1903338	regulation of cell wall organization or biogenesis	biological_process	cellular process	3	6349	4	14485	0.75	0.226076	0.878702
GO:1903409	reactive oxygen species biosynthetic process	biological_process	cellular process	1	6349	1	14485	1	0.438315	0.878702
GO:1903461	Okazaki fragment processing involved in mitotic DNA replication	biological_process	cellular process	1	6349	1	14485	1	0.438315	0.878702
GO:1903507	negative regulation of nucleic acid-templated transcription	biological_process	cellular process	2	6349	2	14485	1	0.192104	0.878702
GO:1903830	magnesium ion transmembrane transport	biological_process	localization	1	6349	1	14485	1	0.438315	0.878702
GO:1903866	palisade mesophyll development	biological_process	developmental process	1	6349	1	14485	1	0.438315	0.878702
GO:1904143	positive regulation of carotenoid biosynthetic process	biological_process	biological regulation	4	6349	5	14485	0.8	0.119797	0.878702
GO:1904263	positive regulation of TORC1 signaling	biological_process	biological regulation	2	6349	3	14485	0.666667	0.407936	0.878702
GO:1904369	positive regulation of sclerenchyma cell differentiation	biological_process	biological regulation	1	6349	1	14485	1	0.438315	0.878702
GO:1904430	negative regulation of t-circle formation	biological_process	biological regulation	1	6349	1	14485	1	0.438315	0.878702
GO:1904812	rRNA acetylation involved in maturation of SSU-rRNA	biological_process	cellular component organization or biogenesis	1	6349	1	14485	1	0.438315	0.878702
GO:1904825	protein localization to microtubule plus-end	biological_process	localization	2	6349	2	14485	1	0.192104	0.878702
GO:1904962	plastid to vacuole vesicle-mediated transport	biological_process	localization	1	6349	1	14485	1	0.438315	0.878702
GO:1905034	regulation of antifungal innate immune response	biological_process	immune system process	1	6349	1	14485	1	0.438315	0.878702
GO:1905143	eukaryotic translation initiation factor 2 complex assembly	biological_process	cellular component organization or biogenesis	1	6349	1	14485	1	0.438315	0.878702
GO:1905183	negative regulation of protein serine/threonine phosphatase activity	biological_process	biological regulation	2	6349	3	14485	0.666667	0.407936	0.878702
GO:1905639	positive regulation of mitochondrial mRNA catabolic process	biological_process	biological regulation	1	6349	1	14485	1	0.438315	0.878702
GO:1905775	negative regulation of DNA helicase activity	biological_process	cellular process	1	6349	1	14485	1	0.438315	0.878702
GO:1990059	fruit valve development	biological_process	developmental process	3	6349	3	14485	1	0.084187	0.878702
GO:1990067	intrachromosomal DNA recombination	biological_process	cellular process	2	6349	3	14485	0.666667	0.407936	0.878702
GO:1990120	messenger ribonucleoprotein complex assembly	biological_process	cellular component organization or biogenesis	1	6349	1	14485	1	0.438315	0.878702
GO:1990169	stress response to copper ion	biological_process	response to stimulus	2	6349	2	14485	1	0.192104	0.878702
GO:1990248	regulation of transcription from RNA polymerase II promoter in response to DNA damage	biological_process	biological regulation	1	6349	1	14485	1	0.438315	0.878702
GO:1990258	histone glutamine methylation	biological_process	cellular component organization or biogenesis	1	6349	1	14485	1	0.438315	0.878702
GO:1990388	xylem-to-phloem iron transport	biological_process	localization	1	6349	1	14485	1	0.438315	0.878702
GO:1990544	mitochondrial ATP transmembrane transport	biological_process	response to stimulus	1	6349	1	14485	1	0.438315	0.878702
GO:1990559	mitochondrial coenzyme A transmembrane transport	biological_process	localization	2	6349	2	14485	1	0.192104	0.878702
GO:1990575	mitochondrial L-ornithine transmembrane transport	biological_process	localization	3	6349	4	14485	0.75	0.226076	0.878702
GO:1990641	response to iron ion starvation	biological_process	response to stimulus	4	6349	7	14485	0.571429	0.367073	0.878702
GO:2000001	regulation of DNA damage checkpoint	biological_process	biological regulation	2	6349	2	14485	1	0.192104	0.878702
GO:2000011	regulation of adaxial/abaxial pattern formation	biological_process	biological regulation	2	6349	3	14485	0.666667	0.407936	0.878702
GO:2000023	regulation of lateral root development	biological_process	developmental process	1	6349	1	14485	1	0.438315	0.878702
GO:2000025	regulation of leaf formation	biological_process	biological regulation	2	6349	2	14485	1	0.192104	0.878702
GO:2000033	regulation of seed dormancy process	biological_process	biological regulation	4	6349	7	14485	0.571429	0.367073	0.878702
GO:2000036	regulation of stem cell population maintenance	biological_process	biological regulation	1	6349	1	14485	1	0.438315	0.878702
GO:2000114	regulation of establishment of cell polarity	biological_process	biological regulation	2	6349	3	14485	0.666667	0.407936	0.878702
GO:2000122	negative regulation of stomatal complex development	biological_process	biological regulation	3	6349	5	14485	0.6	0.385494	0.878702
GO:2000280	regulation of root development	biological_process	biological regulation	13	6349	25	14485	0.52	0.265669	0.878702
GO:2000369	regulation of clathrin-dependent endocytosis	biological_process	biological regulation	2	6349	3	14485	0.666667	0.407936	0.878702
GO:2000379	positive regulation of reactive oxygen species metabolic process	biological_process	biological regulation	1	6349	1	14485	1	0.438315	0.878702
GO:2000469	negative regulation of peroxidase activity	biological_process	biological regulation	4	6349	7	14485	0.571429	0.367073	0.878702
GO:2000488	positive regulation of brassinosteroid biosynthetic process	biological_process	biological regulation	1	6349	1	14485	1	0.438315	0.878702
GO:2000653	regulation of genetic imprinting	biological_process	biological regulation	1	6349	1	14485	1	0.438315	0.878702
GO:2000694	regulation of phragmoplast microtubule organization	biological_process	biological regulation	1	6349	1	14485	1	0.438315	0.878702
GO:2000762	regulation of phenylpropanoid metabolic process	biological_process	biological regulation	4	6349	7	14485	0.571429	0.367073	0.878702
GO:2000767	positive regulation of cytoplasmic translation	biological_process	biological regulation	1	6349	1	14485	1	0.438315	0.878702
GO:2001022	positive regulation of response to DNA damage stimulus	biological_process	biological regulation	4	6349	6	14485	0.666667	0.236241	0.878702
GO:2001108	positive regulation of Rho guanyl-nucleotide exchange factor activity	biological_process	biological regulation	2	6349	2	14485	1	0.192104	0.878702
GO:2001141	regulation of RNA biosynthetic process	biological_process	biological regulation	5	6349	6	14485	0.833333	0.0615752	0.878702
GO:2001295	malonyl-CoA biosynthetic process	biological_process	cellular process	3	6349	4	14485	0.75	0.226076	0.878702
GO:0007005	mitochondrion organization	biological_process	cellular component organization or biogenesis	10	6349	21	14485	0.47619	0.444919	0.885689
GO:0045489	pectin biosynthetic process	biological_process	cellular process	22	6349	48	14485	0.458333	0.444351	0.885689
GO:0055046	microgametogenesis	biological_process	developmental process	10	6349	21	14485	0.47619	0.444919	0.885689
GO:0055075	potassium ion homeostasis	biological_process	biological regulation	10	6349	21	14485	0.47619	0.444919	0.885689
GO:0006526	arginine biosynthetic process	biological_process	cellular process	5	6349	10	14485	0.5	0.465196	0.915385
GO:0006561	proline biosynthetic process	biological_process	cellular process	5	6349	10	14485	0.5	0.465196	0.915385
GO:0007004	telomere maintenance via telomerase	biological_process	biological regulation	5	6349	10	14485	0.5	0.465196	0.915385
GO:0008272	sulfate transport	biological_process	localization	5	6349	10	14485	0.5	0.465196	0.915385
GO:0009089	lysine biosynthetic process via diaminopimelate	biological_process	cellular process	5	6349	10	14485	0.5	0.465196	0.915385
GO:0010152	pollen maturation	biological_process	developmental process	9	6349	19	14485	0.473684	0.4646	0.915385
GO:0010199	organ boundary specification between lateral organs and the meristem	biological_process	developmental process	5	6349	10	14485	0.5	0.465196	0.915385
GO:0010449	root meristem growth	biological_process	developmental process	5	6349	10	14485	0.5	0.465196	0.915385
GO:0031540	regulation of anthocyanin biosynthetic process	biological_process	regulation of biological process	5	6349	10	14485	0.5	0.465196	0.915385
GO:0032544	plastid translation	biological_process	cellular component organization or biogenesis	5	6349	10	14485	0.5	0.465196	0.915385
GO:0035067	negative regulation of histone acetylation	biological_process	biological regulation	5	6349	10	14485	0.5	0.465196	0.915385
GO:0042218	1-aminocyclopropane-1-carboxylate biosynthetic process	biological_process	cellular process	5	6349	10	14485	0.5	0.465196	0.915385
GO:0048467	gynoecium development	biological_process	developmental process	5	6349	10	14485	0.5	0.465196	0.915385
GO:0071732	cellular response to nitric oxide	biological_process	cellular process	5	6349	10	14485	0.5	0.465196	0.915385
GO:0080147	root hair cell development	biological_process	cellular process	5	6349	10	14485	0.5	0.465196	0.915385
GO:0009058	biosynthetic process	biological_process	metabolic process	24	6349	53	14485	0.45283	0.468024	0.919537
GO:0009835	fruit ripening	biological_process	developmental process	24	6349	53	14485	0.45283	0.468024	0.919537
GO:0009637	response to blue light	biological_process	response to stimulus	16	6349	35	14485	0.457143	0.475628	0.933762
GO:0051603	proteolysis involved in cellular protein catabolic process	biological_process	metabolic process	27	6349	60	14485	0.45	0.476997	0.935733
GO:0010540	basipetal auxin transport	biological_process	biological regulation	12	6349	26	14485	0.461538	0.480399	0.941685
GO:0010039	response to iron ion	biological_process	response to stimulus	8	6349	17	14485	0.470588	0.48646	0.95211
GO:0030048	actin filament-based movement	biological_process	cellular process	8	6349	17	14485	0.470588	0.48646	0.95211
GO:0006833	water transport	biological_process	localization	4	6349	8	14485	0.5	0.495689	0.957734
GO:0008652	cellular amino acid biosynthetic process	biological_process	cellular process	4	6349	8	14485	0.5	0.495689	0.957734
GO:0009788	negative regulation of abscisic acid-activated signaling pathway	biological_process	cellular process	22	6349	49	14485	0.44898	0.49504	0.957734
GO:0009902	chloroplast relocation	biological_process	cellular component organization or biogenesis	4	6349	8	14485	0.5	0.495689	0.957734
GO:0010117	photoprotection	biological_process	response to stimulus	4	6349	8	14485	0.5	0.495689	0.957734
GO:0015976	carbon utilization	biological_process	carbon utilization	4	6349	8	14485	0.5	0.495689	0.957734
GO:0031935	regulation of chromatin silencing	biological_process	metabolic process	4	6349	8	14485	0.5	0.495689	0.957734
GO:0033320	UDP-D-xylose biosynthetic process	biological_process	cellular process	4	6349	8	14485	0.5	0.495689	0.957734
GO:0042939	tripeptide transport	biological_process	localization	4	6349	8	14485	0.5	0.495689	0.957734
GO:0043562	cellular response to nitrogen levels	biological_process	response to stimulus	4	6349	8	14485	0.5	0.495689	0.957734
GO:0046486	glycerolipid metabolic process	biological_process	cellular process	4	6349	8	14485	0.5	0.495689	0.957734
GO:0048262	determination of dorsal/ventral asymmetry	biological_process	developmental process	4	6349	8	14485	0.5	0.495689	0.957734
GO:0048530	fruit morphogenesis	biological_process	developmental process	4	6349	8	14485	0.5	0.495689	0.957734
GO:0048574	long-day photoperiodism, flowering	biological_process	developmental process	4	6349	8	14485	0.5	0.495689	0.957734
GO:0061158	3'-UTR-mediated mRNA destabilization	biological_process	biological regulation	4	6349	8	14485	0.5	0.495689	0.957734
GO:0071219	cellular response to molecule of bacterial origin	biological_process	cellular process	4	6349	8	14485	0.5	0.495689	0.957734
GO:1902326	positive regulation of chlorophyll biosynthetic process	biological_process	biological regulation	4	6349	8	14485	0.5	0.495689	0.957734
GO:0006378	mRNA polyadenylation	biological_process	cellular process	11	6349	24	14485	0.458333	0.499775	0.9649
GO:0009733	response to auxin	biological_process	response to stimulus	82	6349	186	14485	0.44086	0.500391	0.965363
GO:0006979	response to oxidative stress	biological_process	response to stimulus	103	6349	234	14485	0.440171	0.502431	0.968568
GO:0000122	negative regulation of transcription by RNA polymerase II	biological_process	biological regulation	21	6349	47	14485	0.446809	0.509401	0.980646
GO:0006631	fatty acid metabolic process	biological_process	cellular process	28	6349	63	14485	0.444444	0.509462	0.980646
GO:0009423	chorismate biosynthetic process	biological_process	cellular process	7	6349	15	14485	0.466667	0.511045	0.980748
GO:0010417	glucuronoxylan biosynthetic process	biological_process	cellular component organization or biogenesis	7	6349	15	14485	0.466667	0.511045	0.980748
GO:0052324	plant-type cell wall cellulose biosynthetic process	biological_process	cellular component organization or biogenesis	7	6349	15	14485	0.466667	0.511045	0.980748
GO:1900458	negative regulation of brassinosteroid mediated signaling pathway	biological_process	biological regulation	7	6349	15	14485	0.466667	0.511045	0.980748
GO:0000038	very long-chain fatty acid metabolic process	biological_process	metabolic process	2	6349	4	14485	0.5	0.589797	0.985812
GO:0000055	ribosomal large subunit export from nucleus	biological_process	cellular component organization or biogenesis	4	6349	9	14485	0.444444	0.611282	0.985812
GO:0000245	spliceosomal complex assembly	biological_process	cellular component organization or biogenesis	6	6349	13	14485	0.461538	0.539139	0.985812
GO:0000349	generation of catalytic spliceosome for first transesterification step	biological_process	cellular component organization or biogenesis	1	6349	2	14485	0.5	0.684527	0.985812
GO:0000460	maturation of 5.8S rRNA	biological_process	cellular component organization or biogenesis	2	6349	4	14485	0.5	0.589797	0.985812
GO:0000469	cleavage involved in rRNA processing	biological_process	cellular process	1	6349	2	14485	0.5	0.684527	0.985812
GO:0000481	maturation of 5S rRNA	biological_process	cellular component organization or biogenesis	1	6349	2	14485	0.5	0.684527	0.985812
GO:0000733	DNA strand renaturation	biological_process	cellular component organization or biogenesis	1	6349	2	14485	0.5	0.684527	0.985812
GO:0000738	DNA catabolic process, exonucleolytic	biological_process	cellular process	1	6349	2	14485	0.5	0.684527	0.985812
GO:0000956	nuclear-transcribed mRNA catabolic process	biological_process	cellular process	2	6349	4	14485	0.5	0.589797	0.985812
GO:0000957	mitochondrial RNA catabolic process	biological_process	cellular process	1	6349	2	14485	0.5	0.684527	0.985812
GO:0000958	mitochondrial mRNA catabolic process	biological_process	biological regulation	1	6349	2	14485	0.5	0.684527	0.985812
GO:0000967	rRNA 5'-end processing	biological_process	cellular component organization or biogenesis	1	6349	2	14485	0.5	0.684527	0.985812
GO:0000972	transcription-dependent tethering of RNA polymerase II gene DNA at nuclear periphery	biological_process	cellular component organization or biogenesis	1	6349	2	14485	0.5	0.684527	0.985812
GO:0001510	RNA methylation	biological_process	cellular process	1	6349	2	14485	0.5	0.684527	0.985812
GO:0001558	regulation of cell growth	biological_process	biological regulation	3	6349	6	14485	0.5	0.534747	0.985812
GO:0001731	formation of translation preinitiation complex	biological_process	cellular component organization or biogenesis	3	6349	6	14485	0.5	0.534747	0.985812
GO:0002127	tRNA wobble base cytosine methylation	biological_process	cellular process	1	6349	2	14485	0.5	0.684527	0.985812
GO:0002188	translation reinitiation	biological_process	cellular process	1	6349	2	14485	0.5	0.684527	0.985812
GO:0002213	defense response to insect	biological_process	multi-organism process	7	6349	16	14485	0.4375	0.597658	0.985812
GO:0005513	detection of calcium ion	biological_process	response to stimulus	2	6349	4	14485	0.5	0.589797	0.985812
GO:0006006	glucose metabolic process	biological_process	metabolic process	7	6349	16	14485	0.4375	0.597658	0.985812
GO:0006012	galactose metabolic process	biological_process	metabolic process	5	6349	12	14485	0.416667	0.666126	0.985812
GO:0006015	5-phosphoribose 1-diphosphate biosynthetic process	biological_process	cellular process	2	6349	4	14485	0.5	0.589797	0.985812
GO:0006024	glycosaminoglycan biosynthetic process	biological_process	metabolic process	2	6349	4	14485	0.5	0.589797	0.985812
GO:0006065	UDP-glucuronate biosynthetic process	biological_process	cellular process	2	6349	4	14485	0.5	0.589797	0.985812
GO:0006096	glycolytic process	biological_process	cellular process	24	6349	56	14485	0.428571	0.608975	0.985812
GO:0006098	pentose-phosphate shunt	biological_process	cellular process	6	6349	13	14485	0.461538	0.539139	0.985812
GO:0006102	isocitrate metabolic process	biological_process	cellular process	2	6349	4	14485	0.5	0.589797	0.985812
GO:0006163	purine nucleotide metabolic process	biological_process	cellular process	1	6349	2	14485	0.5	0.684527	0.985812
GO:0006169	adenosine salvage	biological_process	cellular process	1	6349	2	14485	0.5	0.684527	0.985812
GO:0006177	GMP biosynthetic process	biological_process	cellular process	1	6349	2	14485	0.5	0.684527	0.985812
GO:0006203	dGTP catabolic process	biological_process	cellular process	1	6349	2	14485	0.5	0.684527	0.985812
GO:0006218	uridine catabolic process	biological_process	cellular process	1	6349	2	14485	0.5	0.684527	0.985812
GO:0006226	dUMP biosynthetic process	biological_process	metabolic process	3	6349	6	14485	0.5	0.534747	0.985812
GO:0006228	UTP biosynthetic process	biological_process	cellular process	3	6349	7	14485	0.428571	0.660502	0.985812
GO:0006264	mitochondrial DNA replication	biological_process	metabolic process	2	6349	4	14485	0.5	0.589797	0.985812
GO:0006281	DNA repair	biological_process	response to stimulus	65	6349	150	14485	0.433333	0.580439	0.985812
GO:0006405	RNA export from nucleus	biological_process	localization	2	6349	4	14485	0.5	0.589797	0.985812
GO:0006419	alanyl-tRNA aminoacylation	biological_process	cellular process	1	6349	2	14485	0.5	0.684527	0.985812
GO:0006427	histidyl-tRNA aminoacylation	biological_process	cellular process	1	6349	2	14485	0.5	0.684527	0.985812
GO:0006436	tryptophanyl-tRNA aminoacylation	biological_process	metabolic process	1	6349	2	14485	0.5	0.684527	0.985812
GO:0006464	cellular protein modification process	biological_process	cellular process	3	6349	7	14485	0.428571	0.660502	0.985812
GO:0006516	glycoprotein catabolic process	biological_process	cellular process	1	6349	2	14485	0.5	0.684527	0.985812
GO:0006528	asparagine metabolic process	biological_process	cellular process	1	6349	2	14485	0.5	0.684527	0.985812
GO:0006534	cysteine metabolic process	biological_process	cellular process	1	6349	2	14485	0.5	0.684527	0.985812
GO:0006536	glutamate metabolic process	biological_process	cellular process	5	6349	11	14485	0.454545	0.571922	0.985812
GO:0006537	glutamate biosynthetic process	biological_process	cellular process	1	6349	2	14485	0.5	0.684527	0.985812
GO:0006552	leucine catabolic process	biological_process	cellular process	3	6349	7	14485	0.428571	0.660502	0.985812
GO:0006555	methionine metabolic process	biological_process	cellular process	2	6349	4	14485	0.5	0.589797	0.985812
GO:0006556	S-adenosylmethionine biosynthetic process	biological_process	cellular process	2	6349	4	14485	0.5	0.589797	0.985812
GO:0006559	L-phenylalanine catabolic process	biological_process	cellular process	9	6349	20	14485	0.45	0.54389	0.985812
GO:0006566	threonine metabolic process	biological_process	cellular process	2	6349	4	14485	0.5	0.589797	0.985812
GO:0006572	tyrosine catabolic process	biological_process	cellular process	5	6349	11	14485	0.454545	0.571922	0.985812
GO:0006605	protein targeting	biological_process	localization	4	6349	9	14485	0.444444	0.611282	0.985812
GO:0006607	NLS-bearing protein import into nucleus	biological_process	localization	5	6349	11	14485	0.454545	0.571922	0.985812
GO:0006654	phosphatidic acid biosynthetic process	biological_process	cellular process	1	6349	2	14485	0.5	0.684527	0.985812
GO:0006659	phosphatidylserine biosynthetic process	biological_process	cellular process	1	6349	2	14485	0.5	0.684527	0.985812
GO:0006695	cholesterol biosynthetic process	biological_process	metabolic process	2	6349	4	14485	0.5	0.589797	0.985812
GO:0006723	cuticle hydrocarbon biosynthetic process	biological_process	developmental process	2	6349	4	14485	0.5	0.589797	0.985812
GO:0006741	NADP biosynthetic process	biological_process	cellular process	2	6349	4	14485	0.5	0.589797	0.985812
GO:0006788	heme oxidation	biological_process	cellular process	1	6349	2	14485	0.5	0.684527	0.985812
GO:0006799	polyphosphate biosynthetic process	biological_process	metabolic process	1	6349	2	14485	0.5	0.684527	0.985812
GO:0006839	mitochondrial transport	biological_process	localization	2	6349	4	14485	0.5	0.589797	0.985812
GO:0006851	mitochondrial calcium ion transmembrane transport	biological_process	localization	1	6349	2	14485	0.5	0.684527	0.985812
GO:0006882	cellular zinc ion homeostasis	biological_process	biological regulation	3	6349	7	14485	0.428571	0.660502	0.985812
GO:0006949	syncytium formation	biological_process	cellular process	3	6349	6	14485	0.5	0.534747	0.985812
GO:0006972	hyperosmotic response	biological_process	response to stimulus	3	6349	7	14485	0.428571	0.660502	0.985812
GO:0006974	cellular response to DNA damage stimulus	biological_process	cellular process	17	6349	41	14485	0.414634	0.676423	0.985812
GO:0007000	nucleolus organization	biological_process	cellular component organization or biogenesis	1	6349	2	14485	0.5	0.684527	0.985812
GO:0007021	tubulin complex assembly	biological_process	cellular component organization or biogenesis	3	6349	6	14485	0.5	0.534747	0.985812
GO:0007051	spindle organization	biological_process	cellular component organization or biogenesis	1	6349	2	14485	0.5	0.684527	0.985812
GO:0007060	male meiosis chromosome segregation	biological_process	cellular component organization or biogenesis	1	6349	2	14485	0.5	0.684527	0.985812
GO:0007129	synapsis	biological_process	cellular component organization or biogenesis	5	6349	12	14485	0.416667	0.666126	0.985812
GO:0007166	cell surface receptor signaling pathway	biological_process	biological regulation	2	6349	4	14485	0.5	0.589797	0.985812
GO:0007275	multicellular organism development	biological_process	developmental process	141	6349	324	14485	0.435185	0.567206	0.985812
GO:0007338	single fertilization	biological_process	multi-organism process	3	6349	7	14485	0.428571	0.660502	0.985812
GO:0007569	cell aging	biological_process	developmental process	1	6349	2	14485	0.5	0.684527	0.985812
GO:0008053	mitochondrial fusion	biological_process	cellular process	2	6349	4	14485	0.5	0.589797	0.985812
GO:0008154	actin polymerization or depolymerization	biological_process	cellular component organization or biogenesis	1	6349	2	14485	0.5	0.684527	0.985812
GO:0008202	steroid metabolic process	biological_process	metabolic process	1	6349	2	14485	0.5	0.684527	0.985812
GO:0008340	determination of adult lifespan	biological_process	multicellular organismal process	1	6349	2	14485	0.5	0.684527	0.985812
GO:0009102	biotin biosynthetic process	biological_process	cellular process	4	6349	9	14485	0.444444	0.611282	0.985812
GO:0009107	lipoate biosynthetic process	biological_process	cellular process	1	6349	2	14485	0.5	0.684527	0.985812
GO:0009165	nucleotide biosynthetic process	biological_process	cellular process	3	6349	6	14485	0.5	0.534747	0.985812
GO:0009173	pyrimidine ribonucleoside monophosphate metabolic process	biological_process	cellular process	1	6349	2	14485	0.5	0.684527	0.985812
GO:0009225	nucleotide-sugar metabolic process	biological_process	cellular process	1	6349	2	14485	0.5	0.684527	0.985812
GO:0009267	cellular response to starvation	biological_process	cellular process	3	6349	7	14485	0.428571	0.660502	0.985812
GO:0009269	response to desiccation	biological_process	response to stimulus	6	6349	13	14485	0.461538	0.539139	0.985812
GO:0009294	DNA mediated transformation	biological_process	cellular process	10	6349	23	14485	0.434783	0.593004	0.985812
GO:0009311	oligosaccharide metabolic process	biological_process	metabolic process	3	6349	6	14485	0.5	0.534747	0.985812
GO:0009408	response to heat	biological_process	response to stimulus	50	6349	118	14485	0.423729	0.659249	0.985812
GO:0009446	putrescine biosynthetic process	biological_process	cellular process	1	6349	2	14485	0.5	0.684527	0.985812
GO:0009448	gamma-aminobutyric acid metabolic process	biological_process	metabolic process	2	6349	4	14485	0.5	0.589797	0.985812
GO:0009612	response to mechanical stimulus	biological_process	response to stimulus	2	6349	4	14485	0.5	0.589797	0.985812
GO:0009630	gravitropism	biological_process	response to stimulus	13	6349	30	14485	0.433333	0.59147	0.985812
GO:0009648	photoperiodism	biological_process	response to stimulus	3	6349	6	14485	0.5	0.534747	0.985812
GO:0009651	response to salt stress	biological_process	response to stimulus	175	6349	406	14485	0.431034	0.636397	0.985812
GO:0009652	thigmotropism	biological_process	response to stimulus	2	6349	4	14485	0.5	0.589797	0.985812
GO:0009694	jasmonic acid metabolic process	biological_process	biological regulation	10	6349	24	14485	0.416667	0.659596	0.985812
GO:0009723	response to ethylene	biological_process	response to stimulus	53	6349	121	14485	0.438017	0.537796	0.985812
GO:0009755	hormone-mediated signaling pathway	biological_process	biological regulation	2	6349	4	14485	0.5	0.589797	0.985812
GO:0009765	photosynthesis, light harvesting	biological_process	cellular process	6	6349	13	14485	0.461538	0.539139	0.985812
GO:0009768	photosynthesis, light harvesting in photosystem I	biological_process	cellular process	11	6349	26	14485	0.423077	0.635417	0.985812
GO:0009800	cinnamic acid biosynthetic process	biological_process	cellular process	5	6349	11	14485	0.454545	0.571922	0.985812
GO:0009816	defense response to bacterium, incompatible interaction	biological_process	immune system process	14	6349	34	14485	0.411765	0.684002	0.985812
GO:0009819	drought recovery	biological_process	response to stimulus	3	6349	6	14485	0.5	0.534747	0.985812
GO:0009827	plant-type cell wall modification	biological_process	cellular component organization or biogenesis	7	6349	16	14485	0.4375	0.597658	0.985812
GO:0009838	abscission	biological_process	developmental process	2	6349	4	14485	0.5	0.589797	0.985812
GO:0009863	salicylic acid mediated signaling pathway	biological_process	biological regulation	10	6349	22	14485	0.454545	0.520837	0.985812
GO:0009865	pollen tube adhesion	biological_process	biological adhesion	1	6349	2	14485	0.5	0.684527	0.985812
GO:0009911	positive regulation of flower development	biological_process	biological regulation	17	6349	40	14485	0.425	0.626642	0.985812
GO:0009915	phloem sucrose loading	biological_process	localization	1	6349	2	14485	0.5	0.684527	0.985812
GO:0009970	cellular response to sulfate starvation	biological_process	cellular process	2	6349	4	14485	0.5	0.589797	0.985812
GO:0010023	proanthocyanidin biosynthetic process	biological_process	cellular process	1	6349	2	14485	0.5	0.684527	0.985812
GO:0010030	positive regulation of seed germination	biological_process	biological regulation	11	6349	25	14485	0.44	0.569833	0.985812
GO:0010036	response to boron-containing substance	biological_process	response to stimulus	1	6349	2	14485	0.5	0.684527	0.985812
GO:0010043	response to zinc ion	biological_process	response to stimulus	7	6349	17	14485	0.411765	0.675497	0.985812
GO:0010050	vegetative phase change	biological_process	multicellular organismal process	2	6349	4	14485	0.5	0.589797	0.985812
GO:0010052	guard cell differentiation	biological_process	multicellular organismal process	6	6349	13	14485	0.461538	0.539139	0.985812
GO:0010054	trichoblast differentiation	biological_process	cellular process	1	6349	2	14485	0.5	0.684527	0.985812
GO:0010067	procambium histogenesis	biological_process	developmental process	4	6349	9	14485	0.444444	0.611282	0.985812
GO:0010074	maintenance of meristem identity	biological_process	developmental process	1	6349	2	14485	0.5	0.684527	0.985812
GO:0010078	maintenance of root meristem identity	biological_process	developmental process	8	6349	18	14485	0.444444	0.569324	0.985812
GO:0010086	embryonic root morphogenesis	biological_process	developmental process	1	6349	2	14485	0.5	0.684527	0.985812
GO:0010090	trichome morphogenesis	biological_process	cellular component organization or biogenesis	12	6349	28	14485	0.428571	0.612758	0.985812
GO:0010097	specification of stamen identity	biological_process	developmental process	1	6349	2	14485	0.5	0.684527	0.985812
GO:0010099	regulation of photomorphogenesis	biological_process	biological regulation	3	6349	7	14485	0.428571	0.660502	0.985812
GO:0010100	negative regulation of photomorphogenesis	biological_process	biological regulation	4	6349	9	14485	0.444444	0.611282	0.985812
GO:0010103	stomatal complex morphogenesis	biological_process	developmental process	5	6349	11	14485	0.454545	0.571922	0.985812
GO:0010105	negative regulation of ethylene-activated signaling pathway	biological_process	biological regulation	4	6349	9	14485	0.444444	0.611282	0.985812
GO:0010116	positive regulation of abscisic acid biosynthetic process	biological_process	biological regulation	5	6349	11	14485	0.454545	0.571922	0.985812
GO:0010150	leaf senescence	biological_process	developmental process	46	6349	105	14485	0.438095	0.539513	0.985812
GO:0010151	chloroplast elongation	biological_process	cellular component organization or biogenesis	1	6349	2	14485	0.5	0.684527	0.985812
GO:0010155	regulation of proton transport	biological_process	biological regulation	1	6349	2	14485	0.5	0.684527	0.985812
GO:0010192	mucilage biosynthetic process	biological_process	cellular process	6	6349	13	14485	0.461538	0.539139	0.985812
GO:0010234	anther wall tapetum cell fate specification	biological_process	cellular process	1	6349	2	14485	0.5	0.684527	0.985812
GO:0010236	plastoquinone biosynthetic process	biological_process	cellular process	1	6349	2	14485	0.5	0.684527	0.985812
GO:0010244	response to low fluence blue light stimulus by blue low-fluence system	biological_process	response to stimulus	2	6349	4	14485	0.5	0.589797	0.985812
GO:0010253	UDP-rhamnose biosynthetic process	biological_process	cellular process	2	6349	4	14485	0.5	0.589797	0.985812
GO:0010255	glucose mediated signaling pathway	biological_process	regulation of biological process	1	6349	2	14485	0.5	0.684527	0.985812
GO:0010259	multicellular organism aging	biological_process	multicellular organismal process	1	6349	2	14485	0.5	0.684527	0.985812
GO:0010271	regulation of chlorophyll catabolic process	biological_process	biological regulation	1	6349	2	14485	0.5	0.684527	0.985812
GO:0010336	gibberellic acid homeostasis	biological_process	biological regulation	2	6349	4	14485	0.5	0.589797	0.985812
GO:0010345	suberin biosynthetic process	biological_process	metabolic process	9	6349	21	14485	0.428571	0.618118	0.985812
GO:0010371	regulation of gibberellin biosynthetic process	biological_process	biological regulation	3	6349	6	14485	0.5	0.534747	0.985812
GO:0010412	mannan metabolic process	biological_process	cellular process	2	6349	4	14485	0.5	0.589797	0.985812
GO:0010431	seed maturation	biological_process	developmental process	10	6349	23	14485	0.434783	0.593004	0.985812
GO:0010440	stomatal lineage progression	biological_process	developmental process	1	6349	2	14485	0.5	0.684527	0.985812
GO:0010442	guard cell morphogenesis	biological_process	cellular component organization or biogenesis	1	6349	2	14485	0.5	0.684527	0.985812
GO:0010444	guard mother cell differentiation	biological_process	cellular process	3	6349	6	14485	0.5	0.534747	0.985812
GO:0010495	long-distance posttranscriptional gene silencing	biological_process	biological regulation	1	6349	2	14485	0.5	0.684527	0.985812
GO:0010500	transmitting tissue development	biological_process	developmental process	3	6349	7	14485	0.428571	0.660502	0.985812
GO:0010541	acropetal auxin transport	biological_process	biological regulation	1	6349	2	14485	0.5	0.684527	0.985812
GO:0010569	regulation of double-strand break repair via homologous recombination	biological_process	biological regulation	3	6349	7	14485	0.428571	0.660502	0.985812
GO:0010589	leaf proximal/distal pattern formation	biological_process	multicellular organismal process	1	6349	2	14485	0.5	0.684527	0.985812
GO:0010597	green leaf volatile biosynthetic process	biological_process	cellular process	1	6349	2	14485	0.5	0.684527	0.985812
GO:0010629	negative regulation of gene expression	biological_process	biological regulation	8	6349	19	14485	0.421053	0.645487	0.985812
GO:0010729	positive regulation of hydrogen peroxide biosynthetic process	biological_process	biological regulation	3	6349	7	14485	0.428571	0.660502	0.985812
GO:0010942	positive regulation of cell death	biological_process	biological regulation	2	6349	4	14485	0.5	0.589797	0.985812
GO:0012501	programmed cell death	biological_process	cellular process	7	6349	17	14485	0.411765	0.675497	0.985812
GO:0015689	molybdate ion transport	biological_process	localization	1	6349	2	14485	0.5	0.684527	0.985812
GO:0015709	thiosulfate transport	biological_process	localization	1	6349	2	14485	0.5	0.684527	0.985812
GO:0015713	phosphoglycerate transmembrane transport	biological_process	localization	3	6349	6	14485	0.5	0.534747	0.985812
GO:0015755	fructose transmembrane transport	biological_process	localization	1	6349	2	14485	0.5	0.684527	0.985812
GO:0015805	S-adenosyl-L-methionine transport	biological_process	localization	1	6349	2	14485	0.5	0.684527	0.985812
GO:0015811	L-cystine transport	biological_process	localization	1	6349	2	14485	0.5	0.684527	0.985812
GO:0015812	gamma-aminobutyric acid transport	biological_process	localization	1	6349	2	14485	0.5	0.684527	0.985812
GO:0015866	ADP transport	biological_process	localization	1	6349	2	14485	0.5	0.684527	0.985812
GO:0015867	ATP transport	biological_process	localization	1	6349	2	14485	0.5	0.684527	0.985812
GO:0015893	drug transport	biological_process	localization	1	6349	2	14485	0.5	0.684527	0.985812
GO:0015936	coenzyme A metabolic process	biological_process	metabolic process	2	6349	4	14485	0.5	0.589797	0.985812
GO:0015940	pantothenate biosynthetic process	biological_process	cellular process	1	6349	2	14485	0.5	0.684527	0.985812
GO:0015966	diadenosine tetraphosphate biosynthetic process	biological_process	cellular process	1	6349	2	14485	0.5	0.684527	0.985812
GO:0015995	chlorophyll biosynthetic process	biological_process	metabolic process	14	6349	33	14485	0.424242	0.629852	0.985812
GO:0016036	cellular response to phosphate starvation	biological_process	cellular process	20	6349	45	14485	0.444444	0.52438	0.985812
GO:0016045	detection of bacterium	biological_process	multi-organism process	5	6349	11	14485	0.454545	0.571922	0.985812
GO:0016125	sterol metabolic process	biological_process	metabolic process	14	6349	32	14485	0.4375	0.57142	0.985812
GO:0016132	brassinosteroid biosynthetic process	biological_process	biological regulation	10	6349	24	14485	0.416667	0.659596	0.985812
GO:0016139	glycoside catabolic process	biological_process	metabolic process	1	6349	2	14485	0.5	0.684527	0.985812
GO:0016180	snRNA processing	biological_process	cellular process	3	6349	6	14485	0.5	0.534747	0.985812
GO:0016477	cell migration	biological_process	cellular process	3	6349	7	14485	0.428571	0.660502	0.985812
GO:0017038	protein import	biological_process	localization	1	6349	2	14485	0.5	0.684527	0.985812
GO:0017186	peptidyl-pyroglutamic acid biosynthetic process, using glutaminyl-peptide cyclotransferase	biological_process	cellular process	1	6349	2	14485	0.5	0.684527	0.985812
GO:0018026	peptidyl-lysine monomethylation	biological_process	cellular process	1	6349	2	14485	0.5	0.684527	0.985812
GO:0018206	peptidyl-methionine modification	biological_process	cellular process	1	6349	2	14485	0.5	0.684527	0.985812
GO:0018874	benzoate metabolic process	biological_process	cellular process	1	6349	2	14485	0.5	0.684527	0.985812
GO:0019048	modulation by virus of host morphology or physiology	biological_process	multi-organism process	2	6349	4	14485	0.5	0.589797	0.985812
GO:0019305	dTDP-rhamnose biosynthetic process	biological_process	cellular process	1	6349	2	14485	0.5	0.684527	0.985812
GO:0019318	hexose metabolic process	biological_process	metabolic process	1	6349	2	14485	0.5	0.684527	0.985812
GO:0019346	transsulfuration	biological_process	cellular process	2	6349	4	14485	0.5	0.589797	0.985812
GO:0019427	acetyl-CoA biosynthetic process from acetate	biological_process	cellular process	1	6349	2	14485	0.5	0.684527	0.985812
GO:0019483	beta-alanine biosynthetic process	biological_process	biological regulation	1	6349	2	14485	0.5	0.684527	0.985812
GO:0019499	cyanide metabolic process	biological_process	cellular process	1	6349	2	14485	0.5	0.684527	0.985812
GO:0019567	arabinose biosynthetic process	biological_process	metabolic process	2	6349	4	14485	0.5	0.589797	0.985812
GO:0019628	urate catabolic process	biological_process	cellular process	1	6349	2	14485	0.5	0.684527	0.985812
GO:0019632	shikimate metabolic process	biological_process	cellular process	2	6349	4	14485	0.5	0.589797	0.985812
GO:0019674	NAD metabolic process	biological_process	cellular process	2	6349	4	14485	0.5	0.589797	0.985812
GO:0019722	calcium-mediated signaling	biological_process	biological regulation	9	6349	20	14485	0.45	0.54389	0.985812
GO:0019745	pentacyclic triterpenoid biosynthetic process	biological_process	cellular process	1	6349	2	14485	0.5	0.684527	0.985812
GO:0019953	sexual reproduction	biological_process	multi-organism process	6	6349	13	14485	0.461538	0.539139	0.985812
GO:0019985	translesion synthesis	biological_process	response to stimulus	1	6349	2	14485	0.5	0.684527	0.985812
GO:0022622	root system development	biological_process	developmental process	2	6349	4	14485	0.5	0.589797	0.985812
GO:0030029	actin filament-based process	biological_process	cellular process	2	6349	4	14485	0.5	0.589797	0.985812
GO:0030091	protein repair	biological_process	cellular process	3	6349	6	14485	0.5	0.534747	0.985812
GO:0030163	protein catabolic process	biological_process	metabolic process	37	6349	88	14485	0.420455	0.670967	0.985812
GO:0030490	maturation of SSU-rRNA	biological_process	cellular process	5	6349	12	14485	0.416667	0.666126	0.985812
GO:0030833	regulation of actin filament polymerization	biological_process	biological regulation	1	6349	2	14485	0.5	0.684527	0.985812
GO:0030838	positive regulation of actin filament polymerization	biological_process	biological regulation	3	6349	6	14485	0.5	0.534747	0.985812
GO:0031028	septation initiation signaling	biological_process	biological regulation	3	6349	7	14485	0.428571	0.660502	0.985812
GO:0031048	chromatin silencing by small RNA	biological_process	biological regulation	3	6349	6	14485	0.5	0.534747	0.985812
GO:0031204	posttranslational protein targeting to membrane, translocation	biological_process	localization	3	6349	7	14485	0.428571	0.660502	0.985812
GO:0031425	chloroplast RNA processing	biological_process	cellular process	8	6349	19	14485	0.421053	0.645487	0.985812
GO:0031426	polycistronic mRNA processing	biological_process	cellular process	1	6349	2	14485	0.5	0.684527	0.985812
GO:0031508	pericentric heterochromatin assembly	biological_process	cellular component organization or biogenesis	1	6349	2	14485	0.5	0.684527	0.985812
GO:0031532	actin cytoskeleton reorganization	biological_process	cellular component organization or biogenesis	3	6349	6	14485	0.5	0.534747	0.985812
GO:0031538	negative regulation of anthocyanin metabolic process	biological_process	biological regulation	2	6349	4	14485	0.5	0.589797	0.985812
GO:0031573	intra-S DNA damage checkpoint	biological_process	biological regulation	1	6349	2	14485	0.5	0.684527	0.985812
GO:0031937	positive regulation of chromatin silencing	biological_process	biological regulation	1	6349	2	14485	0.5	0.684527	0.985812
GO:0032259	methylation	biological_process	metabolic process	5	6349	12	14485	0.416667	0.666126	0.985812
GO:0032324	molybdopterin cofactor biosynthetic process	biological_process	cellular process	1	6349	2	14485	0.5	0.684527	0.985812
GO:0032350	regulation of hormone metabolic process	biological_process	biological regulation	1	6349	2	14485	0.5	0.684527	0.985812
GO:0032482	Rab protein signal transduction	biological_process	biological regulation	21	6349	48	14485	0.4375	0.559995	0.985812
GO:0032508	DNA duplex unwinding	biological_process	cellular component organization or biogenesis	8	6349	18	14485	0.444444	0.569324	0.985812
GO:0032790	ribosome disassembly	biological_process	cellular component organization or biogenesis	2	6349	4	14485	0.5	0.589797	0.985812
GO:0033014	tetrapyrrole biosynthetic process	biological_process	cellular process	1	6349	2	14485	0.5	0.684527	0.985812
GO:0033215	iron assimilation by reduction and transport	biological_process	biological regulation	2	6349	4	14485	0.5	0.589797	0.985812
GO:0033306	phytol metabolic process	biological_process	cellular process	1	6349	2	14485	0.5	0.684527	0.985812
GO:0033356	UDP-L-arabinose metabolic process	biological_process	metabolic process	2	6349	4	14485	0.5	0.589797	0.985812
GO:0033383	geranyl diphosphate metabolic process	biological_process	cellular process	1	6349	2	14485	0.5	0.684527	0.985812
GO:0033468	CMP-keto-3-deoxy-D-manno-octulosonic acid biosynthetic process	biological_process	cellular process	2	6349	4	14485	0.5	0.589797	0.985812
GO:0033473	indoleacetic acid conjugate metabolic process	biological_process	biological regulation	1	6349	2	14485	0.5	0.684527	0.985812
GO:0033481	galacturonate biosynthetic process	biological_process	cellular process	2	6349	4	14485	0.5	0.589797	0.985812
GO:0034089	establishment of meiotic sister chromatid cohesion	biological_process	cellular component organization or biogenesis	1	6349	2	14485	0.5	0.684527	0.985812
GO:0034097	response to cytokine	biological_process	response to stimulus	1	6349	2	14485	0.5	0.684527	0.985812
GO:0034196	acylglycerol transport	biological_process	localization	1	6349	2	14485	0.5	0.684527	0.985812
GO:0034398	telomere tethering at nuclear periphery	biological_process	localization	2	6349	4	14485	0.5	0.589797	0.985812
GO:0034421	post-translational protein acetylation	biological_process	cellular process	1	6349	2	14485	0.5	0.684527	0.985812
GO:0034462	small-subunit processome assembly	biological_process	cellular process	1	6349	2	14485	0.5	0.684527	0.985812
GO:0034504	protein localization to nucleus	biological_process	localization	4	6349	9	14485	0.444444	0.611282	0.985812
GO:0034628	'de novo' NAD biosynthetic process from aspartate	biological_process	cellular process	1	6349	2	14485	0.5	0.684527	0.985812
GO:0034765	regulation of ion transmembrane transport	biological_process	biological regulation	10	6349	24	14485	0.416667	0.659596	0.985812
GO:0035066	positive regulation of histone acetylation	biological_process	biological regulation	3	6349	6	14485	0.5	0.534747	0.985812
GO:0035279	mRNA cleavage involved in gene silencing by miRNA	biological_process	biological regulation	1	6349	2	14485	0.5	0.684527	0.985812
GO:0035436	triose phosphate transmembrane transport	biological_process	localization	2	6349	4	14485	0.5	0.589797	0.985812
GO:0035556	intracellular signal transduction	biological_process	cellular process	52	6349	121	14485	0.429752	0.609885	0.985812
GO:0035627	ceramide transport	biological_process	localization	2	6349	4	14485	0.5	0.589797	0.985812
GO:0035835	indole alkaloid biosynthetic process	biological_process	metabolic process	1	6349	2	14485	0.5	0.684527	0.985812
GO:0042023	DNA endoreduplication	biological_process	cellular process	5	6349	12	14485	0.416667	0.666126	0.985812
GO:0042219	cellular modified amino acid catabolic process	biological_process	metabolic process	1	6349	2	14485	0.5	0.684527	0.985812
GO:0042335	cuticle development	biological_process	multicellular organismal process	9	6349	20	14485	0.45	0.54389	0.985812
GO:0042446	hormone biosynthetic process	biological_process	biological regulation	1	6349	2	14485	0.5	0.684527	0.985812
GO:0042548	regulation of photosynthesis, light reaction	biological_process	biological regulation	1	6349	2	14485	0.5	0.684527	0.985812
GO:0042659	regulation of cell fate specification	biological_process	biological regulation	2	6349	4	14485	0.5	0.589797	0.985812
GO:0042762	regulation of sulfur metabolic process	biological_process	cellular process	1	6349	2	14485	0.5	0.684527	0.985812
GO:0042816	vitamin B6 metabolic process	biological_process	cellular process	1	6349	2	14485	0.5	0.684527	0.985812
GO:0042938	dipeptide transport	biological_process	localization	4	6349	9	14485	0.444444	0.611282	0.985812
GO:0043066	negative regulation of apoptotic process	biological_process	biological regulation	1	6349	2	14485	0.5	0.684527	0.985812
GO:0043100	pyrimidine nucleobase salvage	biological_process	metabolic process	2	6349	4	14485	0.5	0.589797	0.985812
GO:0043266	regulation of potassium ion transport	biological_process	biological regulation	1	6349	2	14485	0.5	0.684527	0.985812
GO:0043335	protein unfolding	biological_process	cellular process	1	6349	2	14485	0.5	0.684527	0.985812
GO:0043388	positive regulation of DNA binding	biological_process	biological regulation	1	6349	2	14485	0.5	0.684527	0.985812
GO:0043610	regulation of carbohydrate utilization	biological_process	biological regulation	1	6349	2	14485	0.5	0.684527	0.985812
GO:0043622	cortical microtubule organization	biological_process	cellular component organization or biogenesis	13	6349	30	14485	0.433333	0.59147	0.985812
GO:0043686	co-translational protein modification	biological_process	cellular process	1	6349	2	14485	0.5	0.684527	0.985812
GO:0043928	exonucleolytic nuclear-transcribed mRNA catabolic process involved in deadenylation-dependent decay	biological_process	biological regulation	5	6349	11	14485	0.454545	0.571922	0.985812
GO:0044208	'de novo' AMP biosynthetic process	biological_process	cellular process	1	6349	2	14485	0.5	0.684527	0.985812
GO:0045005	DNA-dependent DNA replication maintenance of fidelity	biological_process	cellular process	1	6349	2	14485	0.5	0.684527	0.985812
GO:0045037	protein import into chloroplast stroma	biological_process	localization	4	6349	9	14485	0.444444	0.611282	0.985812
GO:0045041	protein import into mitochondrial intermembrane space	biological_process	cellular component organization or biogenesis	3	6349	7	14485	0.428571	0.660502	0.985812
GO:0045046	protein import into peroxisome membrane	biological_process	cellular component organization or biogenesis	1	6349	2	14485	0.5	0.684527	0.985812
GO:0045184	establishment of protein localization	biological_process	localization	2	6349	4	14485	0.5	0.589797	0.985812
GO:0045723	positive regulation of fatty acid biosynthetic process	biological_process	biological regulation	4	6349	9	14485	0.444444	0.611282	0.985812
GO:0045893	positive regulation of transcription, DNA-templated	biological_process	biological regulation	123	6349	283	14485	0.434629	0.573134	0.985812
GO:0045900	negative regulation of translational elongation	biological_process	metabolic process	1	6349	2	14485	0.5	0.684527	0.985812
GO:0045927	positive regulation of growth	biological_process	biological regulation	3	6349	6	14485	0.5	0.534747	0.985812
GO:0045930	negative regulation of mitotic cell cycle	biological_process	biological regulation	1	6349	2	14485	0.5	0.684527	0.985812
GO:0045943	positive regulation of transcription by RNA polymerase I	biological_process	biological regulation	1	6349	2	14485	0.5	0.684527	0.985812
GO:0045951	positive regulation of mitotic recombination	biological_process	biological regulation	1	6349	2	14485	0.5	0.684527	0.985812
GO:0046110	xanthine metabolic process	biological_process	cellular process	1	6349	2	14485	0.5	0.684527	0.985812
GO:0046294	formaldehyde catabolic process	biological_process	cellular process	3	6349	7	14485	0.428571	0.660502	0.985812
GO:0046417	chorismate metabolic process	biological_process	metabolic process	1	6349	2	14485	0.5	0.684527	0.985812
GO:0046443	FAD metabolic process	biological_process	cellular process	1	6349	2	14485	0.5	0.684527	0.985812
GO:0046444	FMN metabolic process	biological_process	cellular process	1	6349	2	14485	0.5	0.684527	0.985812
GO:0046459	short-chain fatty acid metabolic process	biological_process	metabolic process	1	6349	2	14485	0.5	0.684527	0.985812
GO:0046482	para-aminobenzoic acid metabolic process	biological_process	cellular process	1	6349	2	14485	0.5	0.684527	0.985812
GO:0046656	folic acid biosynthetic process	biological_process	cellular process	1	6349	2	14485	0.5	0.684527	0.985812
GO:0046685	response to arsenic-containing substance	biological_process	response to stimulus	3	6349	6	14485	0.5	0.534747	0.985812
GO:0046686	response to cadmium ion	biological_process	response to stimulus	75	6349	175	14485	0.428571	0.631239	0.985812
GO:0046713	borate transport	biological_process	localization	3	6349	6	14485	0.5	0.534747	0.985812
GO:0046739	transport of virus in multicellular host	biological_process	localization	2	6349	4	14485	0.5	0.589797	0.985812
GO:0046740	transport of virus in host, cell to cell	biological_process	localization	1	6349	2	14485	0.5	0.684527	0.985812
GO:0046777	protein autophosphorylation	biological_process	cellular process	97	6349	228	14485	0.425439	0.677246	0.985812
GO:0046825	regulation of protein export from nucleus	biological_process	biological regulation	1	6349	2	14485	0.5	0.684527	0.985812
GO:0046838	phosphorylated carbohydrate dephosphorylation	biological_process	cellular process	1	6349	2	14485	0.5	0.684527	0.985812
GO:0048017	inositol lipid-mediated signaling	biological_process	biological regulation	1	6349	2	14485	0.5	0.684527	0.985812
GO:0048026	positive regulation of mRNA splicing, via spliceosome	biological_process	biological regulation	3	6349	7	14485	0.428571	0.660502	0.985812
GO:0048205	COPI coating of Golgi vesicle	biological_process	cellular component organization or biogenesis	1	6349	2	14485	0.5	0.684527	0.985812
GO:0048236	plant-type sporogenesis	biological_process	cellular process	1	6349	2	14485	0.5	0.684527	0.985812
GO:0048255	mRNA stabilization	biological_process	biological regulation	1	6349	2	14485	0.5	0.684527	0.985812
GO:0048364	root development	biological_process	developmental process	53	6349	125	14485	0.424	0.659543	0.985812
GO:0048481	plant ovule development	biological_process	developmental process	17	6349	38	14485	0.447368	0.517624	0.985812
GO:0048482	plant ovule morphogenesis	biological_process	developmental process	1	6349	2	14485	0.5	0.684527	0.985812
GO:0048564	photosystem I assembly	biological_process	cellular component organization or biogenesis	4	6349	9	14485	0.444444	0.611282	0.985812
GO:0048579	negative regulation of long-day photoperiodism, flowering	biological_process	regulation of biological process	7	6349	16	14485	0.4375	0.597658	0.985812
GO:0048609	multicellular organismal reproductive process	biological_process	multicellular organismal process	1	6349	2	14485	0.5	0.684527	0.985812
GO:0048766	root hair initiation	biological_process	cellular component organization or biogenesis	3	6349	7	14485	0.428571	0.660502	0.985812
GO:0048767	root hair elongation	biological_process	cellular process	15	6349	36	14485	0.416667	0.664111	0.985812
GO:0048768	root hair cell tip growth	biological_process	cellular component organization or biogenesis	5	6349	11	14485	0.454545	0.571922	0.985812
GO:0048826	cotyledon morphogenesis	biological_process	developmental process	3	6349	6	14485	0.5	0.534747	0.985812
GO:0048831	regulation of shoot system development	biological_process	multicellular organismal process	5	6349	11	14485	0.454545	0.571922	0.985812
GO:0050482	arachidonic acid secretion	biological_process	localization	1	6349	2	14485	0.5	0.684527	0.985812
GO:0050684	regulation of mRNA processing	biological_process	cellular process	3	6349	6	14485	0.5	0.534747	0.985812
GO:0050688	regulation of defense response to virus	biological_process	biological regulation	1	6349	2	14485	0.5	0.684527	0.985812
GO:0050832	defense response to fungus	biological_process	multi-organism process	83	6349	189	14485	0.439153	0.518917	0.985812
GO:0051085	chaperone cofactor-dependent protein refolding	biological_process	cellular process	17	6349	38	14485	0.447368	0.517624	0.985812
GO:0051171	regulation of nitrogen compound metabolic process	biological_process	metabolic process	1	6349	2	14485	0.5	0.684527	0.985812
GO:0051258	protein polymerization	biological_process	cellular process	1	6349	2	14485	0.5	0.684527	0.985812
GO:0051259	protein complex oligomerization	biological_process	cellular component organization or biogenesis	6	6349	14	14485	0.428571	0.629597	0.985812
GO:0051345	positive regulation of hydrolase activity	biological_process	biological regulation	1	6349	2	14485	0.5	0.684527	0.985812
GO:0051365	cellular response to potassium ion starvation	biological_process	cellular process	2	6349	4	14485	0.5	0.589797	0.985812
GO:0051455	attachment of spindle microtubules to kinetochore involved in homologous chromosome segregation	biological_process	cellular process	1	6349	2	14485	0.5	0.684527	0.985812
GO:0051457	maintenance of protein location in nucleus	biological_process	localization	3	6349	6	14485	0.5	0.534747	0.985812
GO:0051493	regulation of cytoskeleton organization	biological_process	biological regulation	1	6349	2	14485	0.5	0.684527	0.985812
GO:0051511	negative regulation of unidimensional cell growth	biological_process	biological regulation	2	6349	4	14485	0.5	0.589797	0.985812
GO:0051560	mitochondrial calcium ion homeostasis	biological_process	biological regulation	3	6349	6	14485	0.5	0.534747	0.985812
GO:0051562	negative regulation of mitochondrial calcium ion concentration	biological_process	biological regulation	1	6349	2	14485	0.5	0.684527	0.985812
GO:0051571	positive regulation of histone H3-K4 methylation	biological_process	biological regulation	1	6349	2	14485	0.5	0.684527	0.985812
GO:0051607	defense response to virus	biological_process	immune system process	12	6349	29	14485	0.413793	0.672342	0.985812
GO:0051640	organelle localization	biological_process	localization	4	6349	9	14485	0.444444	0.611282	0.985812
GO:0051650	establishment of vesicle localization	biological_process	localization	1	6349	2	14485	0.5	0.684527	0.985812
GO:0051707	response to other organism	biological_process	multi-organism process	4	6349	9	14485	0.444444	0.611282	0.985812
GO:0051776	detection of redox state	biological_process	response to stimulus	1	6349	2	14485	0.5	0.684527	0.985812
GO:0052033	pathogen-associated molecular pattern dependent induction by symbiont of host innate immune response	biological_process	biological regulation	5	6349	11	14485	0.454545	0.571922	0.985812
GO:0052541	plant-type cell wall cellulose metabolic process	biological_process	cellular component organization or biogenesis	1	6349	2	14485	0.5	0.684527	0.985812
GO:0055071	manganese ion homeostasis	biological_process	biological regulation	1	6349	2	14485	0.5	0.684527	0.985812
GO:0055072	iron ion homeostasis	biological_process	biological regulation	10	6349	23	14485	0.434783	0.593004	0.985812
GO:0055074	calcium ion homeostasis	biological_process	biological regulation	1	6349	2	14485	0.5	0.684527	0.985812
GO:0055078	sodium ion homeostasis	biological_process	biological regulation	3	6349	7	14485	0.428571	0.660502	0.985812
GO:0060145	viral gene silencing in virus induced gene silencing	biological_process	biological regulation	1	6349	2	14485	0.5	0.684527	0.985812
GO:0060303	regulation of nucleosome density	biological_process	biological regulation	1	6349	2	14485	0.5	0.684527	0.985812
GO:0060586	multicellular organismal iron ion homeostasis	biological_process	biological regulation	1	6349	2	14485	0.5	0.684527	0.985812
GO:0061086	negative regulation of histone H3-K27 methylation	biological_process	negative regulation of biological process	1	6349	2	14485	0.5	0.684527	0.985812
GO:0061621	canonical glycolysis	biological_process	cellular process	1	6349	2	14485	0.5	0.684527	0.985812
GO:0061635	regulation of protein complex stability	biological_process	biological regulation	2	6349	4	14485	0.5	0.589797	0.985812
GO:0070070	proton-transporting V-type ATPase complex assembly	biological_process	cellular component organization or biogenesis	1	6349	2	14485	0.5	0.684527	0.985812
GO:0070084	protein initiator methionine removal	biological_process	metabolic process	2	6349	4	14485	0.5	0.589797	0.985812
GO:0070125	mitochondrial translational elongation	biological_process	metabolic process	1	6349	2	14485	0.5	0.684527	0.985812
GO:0070150	mitochondrial glycyl-tRNA aminoacylation	biological_process	cellular process	1	6349	2	14485	0.5	0.684527	0.985812
GO:0070301	cellular response to hydrogen peroxide	biological_process	cellular process	3	6349	6	14485	0.5	0.534747	0.985812
GO:0070478	nuclear-transcribed mRNA catabolic process, 3'-5' exonucleolytic nonsense-mediated decay	biological_process	biological regulation	2	6349	4	14485	0.5	0.589797	0.985812
GO:0070481	nuclear-transcribed mRNA catabolic process, non-stop decay	biological_process	biological regulation	2	6349	4	14485	0.5	0.589797	0.985812
GO:0070483	detection of hypoxia	biological_process	response to stimulus	2	6349	4	14485	0.5	0.589797	0.985812
GO:0070534	protein K63-linked ubiquitination	biological_process	cellular process	3	6349	6	14485	0.5	0.534747	0.985812
GO:0070651	nonfunctional rRNA decay	biological_process	cellular process	2	6349	4	14485	0.5	0.589797	0.985812
GO:0070921	regulation of production of siRNA involved in chromatin silencing by small RNA	biological_process	biological regulation	2	6349	4	14485	0.5	0.589797	0.985812
GO:0071140	resolution of mitotic recombination intermediates	biological_process	cellular process	1	6349	2	14485	0.5	0.684527	0.985812
GO:0071333	cellular response to glucose stimulus	biological_process	biological regulation	2	6349	4	14485	0.5	0.589797	0.985812
GO:0071421	manganese ion transmembrane transport	biological_process	localization	1	6349	2	14485	0.5	0.684527	0.985812
GO:0071422	succinate transmembrane transport	biological_process	response to stimulus	1	6349	2	14485	0.5	0.684527	0.985812
GO:0071454	cellular response to anoxia	biological_process	cellular process	1	6349	2	14485	0.5	0.684527	0.985812
GO:0071480	cellular response to gamma radiation	biological_process	cellular process	3	6349	6	14485	0.5	0.534747	0.985812
GO:0071483	cellular response to blue light	biological_process	cellular process	1	6349	2	14485	0.5	0.684527	0.985812
GO:0071484	cellular response to light intensity	biological_process	cellular process	1	6349	2	14485	0.5	0.684527	0.985812
GO:0071493	cellular response to UV-B	biological_process	cellular process	1	6349	2	14485	0.5	0.684527	0.985812
GO:0071494	cellular response to UV-C	biological_process	cellular process	1	6349	2	14485	0.5	0.684527	0.985812
GO:0071555	cell wall organization	biological_process	cellular component organization or biogenesis	153	6349	349	14485	0.438395	0.519704	0.985812
GO:0071705	nitrogen compound transport	biological_process	localization	1	6349	2	14485	0.5	0.684527	0.985812
GO:0072318	clathrin coat disassembly	biological_process	cellular component organization or biogenesis	3	6349	6	14485	0.5	0.534747	0.985812
GO:0072593	reactive oxygen species metabolic process	biological_process	metabolic process	4	6349	9	14485	0.444444	0.611282	0.985812
GO:0072598	protein localization to chloroplast	biological_process	localization	1	6349	2	14485	0.5	0.684527	0.985812
GO:0072660	maintenance of protein location in plasma membrane	biological_process	biological regulation	1	6349	2	14485	0.5	0.684527	0.985812
GO:0075733	intracellular transport of virus	biological_process	localization	1	6349	2	14485	0.5	0.684527	0.985812
GO:0080009	mRNA methylation	biological_process	metabolic process	3	6349	6	14485	0.5	0.534747	0.985812
GO:0080027	response to herbivore	biological_process	multi-organism process	1	6349	2	14485	0.5	0.684527	0.985812
GO:0080029	cellular response to boron-containing substance levels	biological_process	cellular process	1	6349	2	14485	0.5	0.684527	0.985812
GO:0080038	positive regulation of cytokinin-activated signaling pathway	biological_process	biological regulation	1	6349	2	14485	0.5	0.684527	0.985812
GO:0080064	4,4-dimethyl-9beta,19-cyclopropylsterol oxidation	biological_process	cellular process	1	6349	2	14485	0.5	0.684527	0.985812
GO:0080086	stamen filament development	biological_process	developmental process	2	6349	4	14485	0.5	0.589797	0.985812
GO:0080117	secondary growth	biological_process	growth	1	6349	2	14485	0.5	0.684527	0.985812
GO:0080149	sucrose induced translational repression	biological_process	biological regulation	1	6349	2	14485	0.5	0.684527	0.985812
GO:0080173	male-female gamete recognition during double fertilization forming a zygote and endosperm	biological_process	cellular component organization or biogenesis	2	6349	4	14485	0.5	0.589797	0.985812
GO:0080178	5-carbamoylmethyl uridine residue modification	biological_process	cellular process	1	6349	2	14485	0.5	0.684527	0.985812
GO:0080183	response to photooxidative stress	biological_process	response to stimulus	3	6349	6	14485	0.5	0.534747	0.985812
GO:0090059	protoxylem development	biological_process	developmental process	2	6349	4	14485	0.5	0.589797	0.985812
GO:0090065	regulation of production of siRNA involved in RNA interference	biological_process	biological regulation	1	6349	2	14485	0.5	0.684527	0.985812
GO:0090071	negative regulation of ribosome biogenesis	biological_process	biological regulation	1	6349	2	14485	0.5	0.684527	0.985812
GO:0090116	C-5 methylation of cytosine	biological_process	cellular process	1	6349	2	14485	0.5	0.684527	0.985812
GO:0090156	cellular sphingolipid homeostasis	biological_process	biological regulation	2	6349	4	14485	0.5	0.589797	0.985812
GO:0090309	positive regulation of methylation-dependent chromatin silencing	biological_process	biological regulation	1	6349	2	14485	0.5	0.684527	0.985812
GO:0090378	seed trichome elongation	biological_process	reproduction	3	6349	6	14485	0.5	0.534747	0.985812
GO:0090436	leaf pavement cell development	biological_process	cellular process	1	6349	2	14485	0.5	0.684527	0.985812
GO:0090501	RNA phosphodiester bond hydrolysis	biological_process	cellular process	3	6349	7	14485	0.428571	0.660502	0.985812
GO:0090502	RNA phosphodiester bond hydrolysis, endonucleolytic	biological_process	cellular process	5	6349	11	14485	0.454545	0.571922	0.985812
GO:0090558	plant epidermis development	biological_process	developmental process	2	6349	4	14485	0.5	0.589797	0.985812
GO:0090693	plant organ senescence	biological_process	multicellular organismal process	2	6349	4	14485	0.5	0.589797	0.985812
GO:0097264	self proteolysis	biological_process	metabolic process	1	6349	2	14485	0.5	0.684527	0.985812
GO:0098530	positive regulation of strand invasion	biological_process	metabolic process	1	6349	2	14485	0.5	0.684527	0.985812
GO:0098712	L-glutamate import across plasma membrane	biological_process	biological regulation	2	6349	4	14485	0.5	0.589797	0.985812
GO:0098876	vesicle-mediated transport to the plasma membrane	biological_process	localization	3	6349	7	14485	0.428571	0.660502	0.985812
GO:0099402	plant organ development	biological_process	developmental process	6	6349	14	14485	0.428571	0.629597	0.985812
GO:0110102	chloroplast ribulose bisphosphate carboxylase complex assembly	biological_process	cellular component organization or biogenesis	1	6349	2	14485	0.5	0.684527	0.985812
GO:0110128	phloem sucrose unloading	biological_process	localization	1	6349	2	14485	0.5	0.684527	0.985812
GO:0120009	intermembrane lipid transfer	biological_process	cellular component organization or biogenesis	2	6349	4	14485	0.5	0.589797	0.985812
GO:0120010	intermembrane phospholipid transfer	biological_process	cellular component organization or biogenesis	1	6349	2	14485	0.5	0.684527	0.985812
GO:1900140	regulation of seedling development	biological_process	biological regulation	3	6349	7	14485	0.428571	0.660502	0.985812
GO:1900363	regulation of mRNA polyadenylation	biological_process	biological regulation	2	6349	4	14485	0.5	0.589797	0.985812
GO:1900386	positive regulation of flavonol biosynthetic process	biological_process	biological regulation	1	6349	2	14485	0.5	0.684527	0.985812
GO:1900425	negative regulation of defense response to bacterium	biological_process	multi-organism process	12	6349	27	14485	0.444444	0.54835	0.985812
GO:1900864	mitochondrial RNA modification	biological_process	cellular process	3	6349	6	14485	0.5	0.534747	0.985812
GO:1900865	chloroplast RNA modification	biological_process	cellular process	6	6349	13	14485	0.461538	0.539139	0.985812
GO:1901135	carbohydrate derivative metabolic process	biological_process	metabolic process	2	6349	4	14485	0.5	0.589797	0.985812
GO:1901527	abscisic acid-activated signaling pathway involved in stomatal movement	biological_process	biological regulation	2	6349	4	14485	0.5	0.589797	0.985812
GO:1901565	organonitrogen compound catabolic process	biological_process	metabolic process	1	6349	2	14485	0.5	0.684527	0.985812
GO:1901671	positive regulation of superoxide dismutase activity	biological_process	biological regulation	1	6349	2	14485	0.5	0.684527	0.985812
GO:1901698	response to nitrogen compound	biological_process	response to stimulus	1	6349	2	14485	0.5	0.684527	0.985812
GO:1902183	regulation of shoot apical meristem development	biological_process	biological regulation	6	6349	13	14485	0.461538	0.539139	0.985812
GO:1902412	regulation of mitotic cytokinesis	biological_process	biological regulation	1	6349	2	14485	0.5	0.684527	0.985812
GO:1902464	regulation of histone H3-K27 trimethylation	biological_process	biological regulation	1	6349	2	14485	0.5	0.684527	0.985812
GO:1902478	negative regulation of defense response to bacterium, incompatible interaction	biological_process	negative regulation of biological process	3	6349	6	14485	0.5	0.534747	0.985812
GO:1902542	regulation of protein localization to mitotic spindle pole body	biological_process	biological regulation	1	6349	2	14485	0.5	0.684527	0.985812
GO:1902626	assembly of large subunit precursor of preribosome	biological_process	cellular component organization or biogenesis	3	6349	6	14485	0.5	0.534747	0.985812
GO:1903224	regulation of endodermal cell differentiation	biological_process	biological regulation	2	6349	4	14485	0.5	0.589797	0.985812
GO:1903646	positive regulation of chaperone-mediated protein folding	biological_process	biological regulation	1	6349	2	14485	0.5	0.684527	0.985812
GO:1903800	positive regulation of production of miRNAs involved in gene silencing by miRNA	biological_process	biological regulation	1	6349	2	14485	0.5	0.684527	0.985812
GO:1904659	glucose transmembrane transport	biological_process	localization	1	6349	2	14485	0.5	0.684527	0.985812
GO:1904667	negative regulation of ubiquitin protein ligase activity	biological_process	biological regulation	1	6349	2	14485	0.5	0.684527	0.985812
GO:1904961	quiescent center organization	biological_process	developmental process	1	6349	2	14485	0.5	0.684527	0.985812
GO:1905036	positive regulation of antifungal innate immune response	biological_process	biological regulation	1	6349	2	14485	0.5	0.684527	0.985812
GO:1905393	plant organ formation	biological_process	developmental process	4	6349	9	14485	0.444444	0.611282	0.985812
GO:1905428	regulation of plant organ formation	biological_process	regulation of biological process	1	6349	2	14485	0.5	0.684527	0.985812
GO:1905615	positive regulation of developmental vegetative growth	biological_process	biological regulation	3	6349	6	14485	0.5	0.534747	0.985812
GO:1905642	negative regulation of DNA methylation	biological_process	biological regulation	1	6349	2	14485	0.5	0.684527	0.985812
GO:1905933	regulation of cell fate determination	biological_process	biological regulation	1	6349	2	14485	0.5	0.684527	0.985812
GO:1990058	fruit replum development	biological_process	developmental process	1	6349	2	14485	0.5	0.684527	0.985812
GO:1990110	callus formation	biological_process	multicellular organismal process	1	6349	2	14485	0.5	0.684527	0.985812
GO:1990426	mitotic recombination-dependent replication fork processing	biological_process	cellular process	1	6349	2	14485	0.5	0.684527	0.985812
GO:1990481	mRNA pseudouridine synthesis	biological_process	cellular process	1	6349	2	14485	0.5	0.684527	0.985812
GO:1990542	mitochondrial transmembrane transport	biological_process	localization	1	6349	2	14485	0.5	0.684527	0.985812
GO:1990966	ATP generation from poly-ADP-D-ribose	biological_process	cellular process	1	6349	2	14485	0.5	0.684527	0.985812
GO:2000032	regulation of secondary shoot formation	biological_process	developmental process	5	6349	11	14485	0.454545	0.571922	0.985812
GO:2000068	regulation of defense response to insect	biological_process	biological regulation	1	6349	2	14485	0.5	0.684527	0.985812
GO:2000214	regulation of proline metabolic process	biological_process	biological regulation	1	6349	2	14485	0.5	0.684527	0.985812
GO:2000785	regulation of autophagosome assembly	biological_process	biological regulation	1	6349	2	14485	0.5	0.684527	0.985812
GO:0008654	phospholipid biosynthetic process	biological_process	cellular process	11	6349	27	14485	0.407407	0.695276	0.999605
GO:0010091	trichome branching	biological_process	cellular process	16	6349	39	14485	0.410256	0.69477	0.999605
GO:0048359	mucilage metabolic process involved in seed coat development	biological_process	metabolic process	11	6349	27	14485	0.407407	0.695276	0.999605
GO:0000077	DNA damage checkpoint	biological_process	biological regulation	2	6349	5	14485	0.4	0.725998	0.999823
GO:0000388	spliceosome conformational change to release U4 (or U4atac) and U1 (or U11)	biological_process	cellular component organization or biogenesis	2	6349	5	14485	0.4	0.725998	0.999823
GO:0002183	cytoplasmic translational initiation	biological_process	metabolic process	4	6349	10	14485	0.4	0.708674	0.999823
GO:0006011	UDP-glucose metabolic process	biological_process	cellular process	2	6349	5	14485	0.4	0.725998	0.999823
GO:0006221	pyrimidine nucleotide biosynthetic process	biological_process	cellular process	2	6349	5	14485	0.4	0.725998	0.999823
GO:0006325	chromatin organization	biological_process	cellular component organization or biogenesis	30	6349	73	14485	0.410959	0.721359	0.999823
GO:0006333	chromatin assembly or disassembly	biological_process	cellular process	2	6349	5	14485	0.4	0.725998	0.999823
GO:0006342	chromatin silencing	biological_process	biological regulation	4	6349	10	14485	0.4	0.708674	0.999823
GO:0006542	glutamine biosynthetic process	biological_process	cellular process	2	6349	5	14485	0.4	0.725998	0.999823
GO:0006656	phosphatidylcholine biosynthetic process	biological_process	cellular process	2	6349	5	14485	0.4	0.725998	0.999823
GO:0006850	mitochondrial pyruvate transmembrane transport	biological_process	localization	2	6349	5	14485	0.4	0.725998	0.999823
GO:0007050	cell cycle arrest	biological_process	biological regulation	2	6349	5	14485	0.4	0.725998	0.999823
GO:0007219	Notch signaling pathway	biological_process	biological regulation	2	6349	5	14485	0.4	0.725998	0.999823
GO:0009082	branched-chain amino acid biosynthetic process	biological_process	cellular process	2	6349	5	14485	0.4	0.725998	0.999823
GO:0009097	isoleucine biosynthetic process	biological_process	cellular process	8	6349	20	14485	0.4	0.713218	0.999823
GO:0009395	phospholipid catabolic process	biological_process	cellular process	2	6349	5	14485	0.4	0.725998	0.999823
GO:0009616	virus induced gene silencing	biological_process	immune system process	2	6349	5	14485	0.4	0.725998	0.999823
GO:0009638	phototropism	biological_process	response to stimulus	4	6349	10	14485	0.4	0.708674	0.999823
GO:0009642	response to light intensity	biological_process	response to stimulus	4	6349	10	14485	0.4	0.708674	0.999823
GO:0009685	gibberellin metabolic process	biological_process	biological regulation	2	6349	5	14485	0.4	0.725998	0.999823
GO:0009686	gibberellin biosynthetic process	biological_process	biological regulation	12	6349	30	14485	0.4	0.726257	0.999823
GO:0009699	phenylpropanoid biosynthetic process	biological_process	cellular process	2	6349	5	14485	0.4	0.725998	0.999823
GO:0009739	response to gibberellin	biological_process	response to stimulus	32	6349	77	14485	0.415584	0.696492	0.999823
GO:0010014	meristem initiation	biological_process	developmental process	2	6349	5	14485	0.4	0.725998	0.999823
GO:0010070	zygote asymmetric cell division	biological_process	cellular process	2	6349	5	14485	0.4	0.725998	0.999823
GO:0010076	maintenance of floral meristem identity	biological_process	developmental process	2	6349	5	14485	0.4	0.725998	0.999823
GO:0010077	maintenance of inflorescence meristem identity	biological_process	developmental process	4	6349	10	14485	0.4	0.708674	0.999823
GO:0010205	photoinhibition	biological_process	cellular process	2	6349	5	14485	0.4	0.725998	0.999823
GO:0010208	pollen wall assembly	biological_process	cellular component organization or biogenesis	6	6349	15	14485	0.4	0.708632	0.999823
GO:0010288	response to lead ion	biological_process	response to stimulus	2	6349	5	14485	0.4	0.725998	0.999823
GO:0010366	negative regulation of ethylene biosynthetic process	biological_process	biological regulation	2	6349	5	14485	0.4	0.725998	0.999823
GO:0010929	positive regulation of auxin mediated signaling pathway	biological_process	biological regulation	4	6349	10	14485	0.4	0.708674	0.999823
GO:0010973	positive regulation of division septum assembly	biological_process	biological regulation	2	6349	5	14485	0.4	0.725998	0.999823
GO:0015714	phosphoenolpyruvate transport	biological_process	localization	2	6349	5	14485	0.4	0.725998	0.999823
GO:0015804	neutral amino acid transport	biological_process	localization	2	6349	5	14485	0.4	0.725998	0.999823
GO:0015858	nucleoside transport	biological_process	localization	2	6349	5	14485	0.4	0.725998	0.999823
GO:0015908	fatty acid transport	biological_process	localization	4	6349	10	14485	0.4	0.708674	0.999823
GO:0016024	CDP-diacylglycerol biosynthetic process	biological_process	cellular process	6	6349	15	14485	0.4	0.708632	0.999823
GO:0016127	sterol catabolic process	biological_process	metabolic process	2	6349	5	14485	0.4	0.725998	0.999823
GO:0016135	saponin biosynthetic process	biological_process	metabolic process	2	6349	5	14485	0.4	0.725998	0.999823
GO:0016246	RNA interference	biological_process	biological regulation	2	6349	5	14485	0.4	0.725998	0.999823
GO:0019915	lipid storage	biological_process	biological regulation	8	6349	20	14485	0.4	0.713218	0.999823
GO:0022900	electron transport chain	biological_process	cellular process	6	6349	15	14485	0.4	0.708632	0.999823
GO:0030104	water homeostasis	biological_process	biological regulation	4	6349	10	14485	0.4	0.708674	0.999823
GO:0030308	negative regulation of cell growth	biological_process	biological regulation	2	6349	5	14485	0.4	0.725998	0.999823
GO:0032957	inositol trisphosphate metabolic process	biological_process	cellular process	4	6349	10	14485	0.4	0.708674	0.999823
GO:0033499	galactose catabolic process via UDP-galactose	biological_process	metabolic process	2	6349	5	14485	0.4	0.725998	0.999823
GO:0033500	carbohydrate homeostasis	biological_process	biological regulation	2	6349	5	14485	0.4	0.725998	0.999823
GO:0034219	carbohydrate transmembrane transport	biological_process	localization	2	6349	5	14485	0.4	0.725998	0.999823
GO:0034220	ion transmembrane transport	biological_process	localization	2	6349	5	14485	0.4	0.725998	0.999823
GO:0034434	sterol esterification	biological_process	metabolic process	2	6349	5	14485	0.4	0.725998	0.999823
GO:0034613	cellular protein localization	biological_process	localization	4	6349	10	14485	0.4	0.708674	0.999823
GO:0034975	protein folding in endoplasmic reticulum	biological_process	cellular process	2	6349	5	14485	0.4	0.725998	0.999823
GO:0042407	cristae formation	biological_process	cellular process	2	6349	5	14485	0.4	0.725998	0.999823
GO:0042780	tRNA 3'-end processing	biological_process	metabolic process	2	6349	5	14485	0.4	0.725998	0.999823
GO:0044209	AMP salvage	biological_process	cellular process	2	6349	5	14485	0.4	0.725998	0.999823
GO:0045088	regulation of innate immune response	biological_process	biological regulation	4	6349	10	14485	0.4	0.708674	0.999823
GO:0045604	regulation of epidermal cell differentiation	biological_process	biological regulation	2	6349	5	14485	0.4	0.725998	0.999823
GO:0045736	negative regulation of cyclin-dependent protein serine/threonine kinase activity	biological_process	biological regulation	2	6349	5	14485	0.4	0.725998	0.999823
GO:0045806	negative regulation of endocytosis	biological_process	biological regulation	2	6349	5	14485	0.4	0.725998	0.999823
GO:0046168	glycerol-3-phosphate catabolic process	biological_process	cellular process	2	6349	5	14485	0.4	0.725998	0.999823
GO:0046473	phosphatidic acid metabolic process	biological_process	cellular process	2	6349	5	14485	0.4	0.725998	0.999823
GO:0048317	seed morphogenesis	biological_process	developmental process	2	6349	5	14485	0.4	0.725998	0.999823
GO:0048462	carpel formation	biological_process	developmental process	2	6349	5	14485	0.4	0.725998	0.999823
GO:0050777	negative regulation of immune response	biological_process	biological regulation	2	6349	5	14485	0.4	0.725998	0.999823
GO:0051228	mitotic spindle disassembly	biological_process	cellular component organization or biogenesis	2	6349	5	14485	0.4	0.725998	0.999823
GO:0071456	cellular response to hypoxia	biological_process	cellular process	6	6349	15	14485	0.4	0.708632	0.999823
GO:0071486	cellular response to high light intensity	biological_process	response to stimulus	2	6349	5	14485	0.4	0.725998	0.999823
GO:0071629	cytoplasm protein quality control by the ubiquitin-proteasome system	biological_process	cellular process	2	6349	5	14485	0.4	0.725998	0.999823
GO:0072334	UDP-galactose transmembrane transport	biological_process	localization	2	6349	5	14485	0.4	0.725998	0.999823
GO:0080022	primary root development	biological_process	multicellular organismal process	4	6349	10	14485	0.4	0.708674	0.999823
GO:0080143	regulation of amino acid export	biological_process	biological regulation	2	6349	5	14485	0.4	0.725998	0.999823
GO:0097352	autophagosome maturation	biological_process	cellular component organization or biogenesis	2	6349	5	14485	0.4	0.725998	0.999823
GO:1900111	positive regulation of histone H3-K9 dimethylation	biological_process	biological regulation	2	6349	5	14485	0.4	0.725998	0.999823
GO:1904966	positive regulation of vitamin E biosynthetic process	biological_process	biological regulation	2	6349	5	14485	0.4	0.725998	0.999823
GO:2000071	regulation of defense response by callose deposition	biological_process	biological regulation	2	6349	5	14485	0.4	0.725998	0.999823
GO:2000652	regulation of secondary cell wall biogenesis	biological_process	cellular component organization or biogenesis	4	6349	10	14485	0.4	0.708674	0.999823
GO:2000769	regulation of establishment or maintenance of cell polarity regulating cell shape	biological_process	biological regulation	2	6349	5	14485	0.4	0.725998	0.999823
GO:2001289	lipid X metabolic process	biological_process	cellular process	2	6349	5	14485	0.4	0.725998	0.999823
GO:0000003	reproduction	biological_process	reproduction	1	6349	4	14485	0.25	0.900499	1
GO:0000023	maltose metabolic process	biological_process	cellular process	1	6349	3	14485	0.333333	0.822823	1
GO:0000032	cell wall mannoprotein biosynthetic process	biological_process	cellular component organization or biogenesis	1	6349	3	14485	0.333333	0.822823	1
GO:0000045	autophagosome assembly	biological_process	cellular process	6	6349	24	14485	0.25	0.983162	1
GO:0000054	ribosomal subunit export from nucleus	biological_process	localization	1	6349	7	14485	0.142857	0.982382	1
GO:0000103	sulfate assimilation	biological_process	cellular process	2	6349	10	14485	0.2	0.972524	1
GO:0000105	histidine biosynthetic process	biological_process	cellular process	2	6349	8	14485	0.25	0.9283	1
GO:0000160	phosphorelay signal transduction system	biological_process	biological regulation	13	6349	35	14485	0.371429	0.833568	1
GO:0000165	MAPK cascade	biological_process	biological regulation	9	6349	24	14485	0.375	0.796092	1
GO:0000184	nuclear-transcribed mRNA catabolic process, nonsense-mediated decay	biological_process	biological regulation	5	6349	19	14485	0.263158	0.964996	1
GO:0000209	protein polyubiquitination	biological_process	cellular process	9	6349	30	14485	0.3	0.958896	1
GO:0000244	spliceosomal tri-snRNP complex assembly	biological_process	cellular component organization or biogenesis	1	6349	4	14485	0.25	0.900499	1
GO:0000266	mitochondrial fission	biological_process	cellular component organization or biogenesis	6	6349	21	14485	0.285714	0.951365	1
GO:0000289	nuclear-transcribed mRNA poly(A) tail shortening	biological_process	biological regulation	5	6349	18	14485	0.277778	0.949609	1
GO:0000290	deadenylation-dependent decapping of nuclear-transcribed mRNA	biological_process	biological regulation	2	6349	10	14485	0.2	0.972524	1
GO:0000304	response to singlet oxygen	biological_process	response to stimulus	1	6349	3	14485	0.333333	0.822823	1
GO:0000338	protein deneddylation	biological_process	cellular process	3	6349	11	14485	0.272727	0.924454	1
GO:0000373	Group II intron splicing	biological_process	cellular process	10	6349	31	14485	0.322581	0.932616	1
GO:0000394	RNA splicing, via endonucleolytic cleavage and ligation	biological_process	cellular process	1	6349	3	14485	0.333333	0.822823	1
GO:0000398	mRNA splicing, via spliceosome	biological_process	cellular process	32	6349	99	14485	0.323232	0.992827	1
GO:0000413	protein peptidyl-prolyl isomerization	biological_process	cellular process	5	6349	13	14485	0.384615	0.745493	1
GO:0000422	autophagy of mitochondrion	biological_process	cellular component organization or biogenesis	2	6349	17	14485	0.117647	0.999218	1
GO:0000453	enzyme-directed rRNA 2'-O-methylation	biological_process	cellular component organization or biogenesis	1	6349	3	14485	0.333333	0.822823	1
GO:0000706	meiotic DNA double-strand break processing	biological_process	cellular process	1	6349	4	14485	0.25	0.900499	1
GO:0000723	telomere maintenance	biological_process	biological regulation	6	6349	29	14485	0.206897	0.997564	1
GO:0000725	recombinational repair	biological_process	cellular process	1	6349	3	14485	0.333333	0.822823	1
GO:0000737	DNA catabolic process, endonucleolytic	biological_process	cellular process	1	6349	3	14485	0.333333	0.822823	1
GO:0000963	mitochondrial RNA processing	biological_process	cellular process	2	6349	7	14485	0.285714	0.886073	1
GO:0000965	mitochondrial RNA 3'-end processing	biological_process	cellular process	1	6349	4	14485	0.25	0.900499	1
GO:0001174	transcriptional start site selection at RNA polymerase II promoter	biological_process	cellular process	1	6349	4	14485	0.25	0.900499	1
GO:0001302	replicative cell aging	biological_process	developmental process	1	6349	3	14485	0.333333	0.822823	1
GO:0001522	pseudouridine synthesis	biological_process	cellular process	5	6349	13	14485	0.384615	0.745493	1
GO:0001666	response to hypoxia	biological_process	response to stimulus	8	6349	25	14485	0.32	0.920407	1
GO:0001682	tRNA 5'-leader removal	biological_process	cellular process	1	6349	4	14485	0.25	0.900499	1
GO:0001708	cell fate specification	biological_process	cellular process	2	6349	9	14485	0.222222	0.955402	1
GO:0001736	establishment of planar polarity	biological_process	developmental process	1	6349	4	14485	0.25	0.900499	1
GO:0002098	tRNA wobble uridine modification	biological_process	cellular process	4	6349	11	14485	0.363636	0.786817	1
GO:0002184	cytoplasmic translational termination	biological_process	cellular component organization or biogenesis	3	6349	8	14485	0.375	0.75939	1
GO:0002215	defense response to nematode	biological_process	multi-organism process	1	6349	4	14485	0.25	0.900499	1
GO:0002230	positive regulation of defense response to virus by host	biological_process	biological regulation	1	6349	4	14485	0.25	0.900499	1
GO:0002237	response to molecule of bacterial origin	biological_process	response to stimulus	16	6349	40	14485	0.4	0.740188	1
GO:0002939	tRNA N1-guanine methylation	biological_process	metabolic process	1	6349	3	14485	0.333333	0.822823	1
GO:0002949	tRNA threonylcarbamoyladenosine modification	biological_process	cellular process	1	6349	4	14485	0.25	0.900499	1
GO:0003400	regulation of COPII vesicle coating	biological_process	biological regulation	1	6349	6	14485	0.166667	0.968624	1
GO:0005976	polysaccharide metabolic process	biological_process	metabolic process	1	6349	3	14485	0.333333	0.822823	1
GO:0005978	glycogen biosynthetic process	biological_process	cellular process	2	6349	9	14485	0.222222	0.955402	1
GO:0005982	starch metabolic process	biological_process	cellular process	3	6349	8	14485	0.375	0.75939	1
GO:0005985	sucrose metabolic process	biological_process	cellular process	12	6349	31	14485	0.387097	0.774066	1
GO:0005997	xylulose metabolic process	biological_process	metabolic process	1	6349	3	14485	0.333333	0.822823	1
GO:0006004	fucose metabolic process	biological_process	metabolic process	13	6349	42	14485	0.309524	0.968959	1
GO:0006013	mannose metabolic process	biological_process	metabolic process	2	6349	6	14485	0.333333	0.821624	1
GO:0006020	inositol metabolic process	biological_process	cellular process	1	6349	3	14485	0.333333	0.822823	1
GO:0006048	UDP-N-acetylglucosamine biosynthetic process	biological_process	cellular process	1	6349	6	14485	0.166667	0.968624	1
GO:0006072	glycerol-3-phosphate metabolic process	biological_process	cellular process	1	6349	4	14485	0.25	0.900499	1
GO:0006075	(1->3)-beta-D-glucan biosynthetic process	biological_process	metabolic process	3	6349	9	14485	0.333333	0.833444	1
GO:0006081	cellular aldehyde metabolic process	biological_process	cellular process	1	6349	6	14485	0.166667	0.968624	1
GO:0006084	acetyl-CoA metabolic process	biological_process	cellular process	1	6349	3	14485	0.333333	0.822823	1
GO:0006085	acetyl-CoA biosynthetic process	biological_process	metabolic process	1	6349	3	14485	0.333333	0.822823	1
GO:0006086	acetyl-CoA biosynthetic process from pyruvate	biological_process	cellular process	3	6349	9	14485	0.333333	0.833444	1
GO:0006097	glyoxylate cycle	biological_process	cellular process	5	6349	13	14485	0.384615	0.745493	1
GO:0006099	tricarboxylic acid cycle	biological_process	cellular process	12	6349	46	14485	0.26087	0.995915	1
GO:0006103	2-oxoglutarate metabolic process	biological_process	cellular process	2	6349	7	14485	0.285714	0.886073	1
GO:0006108	malate metabolic process	biological_process	cellular process	6	6349	17	14485	0.352941	0.829608	1
GO:0006121	mitochondrial electron transport, succinate to ubiquinone	biological_process	cellular process	1	6349	4	14485	0.25	0.900499	1
GO:0006152	purine nucleoside catabolic process	biological_process	cellular process	2	6349	6	14485	0.333333	0.821624	1
GO:0006166	purine ribonucleoside salvage	biological_process	cellular process	1	6349	5	14485	0.2	0.944124	1
GO:0006168	adenine salvage	biological_process	cellular process	1	6349	3	14485	0.333333	0.822823	1
GO:0006183	GTP biosynthetic process	biological_process	cellular process	3	6349	8	14485	0.375	0.75939	1
GO:0006189	'de novo' IMP biosynthetic process	biological_process	cellular process	2	6349	11	14485	0.181818	0.983206	1
GO:0006212	uracil catabolic process	biological_process	cellular process	1	6349	4	14485	0.25	0.900499	1
GO:0006296	nucleotide-excision repair, DNA incision, 5'-to lesion	biological_process	cellular process	1	6349	4	14485	0.25	0.900499	1
GO:0006301	postreplication repair	biological_process	cellular process	2	6349	7	14485	0.285714	0.886073	1
GO:0006306	DNA methylation	biological_process	cellular process	7	6349	21	14485	0.333333	0.884178	1
GO:0006310	DNA recombination	biological_process	cellular process	28	6349	154	14485	0.181818	1	1
GO:0006313	transposition, DNA-mediated	biological_process	cellular process	2	6349	17	14485	0.117647	0.999218	1
GO:0006314	intron homing	biological_process	cellular process	1	6349	3	14485	0.333333	0.822823	1
GO:0006338	chromatin remodeling	biological_process	cellular component organization or biogenesis	7	6349	31	14485	0.225806	0.996094	1
GO:0006352	DNA-templated transcription, initiation	biological_process	cellular process	7	6349	20	14485	0.35	0.846699	1
GO:0006353	DNA-templated transcription, termination	biological_process	cellular process	6	6349	18	14485	0.333333	0.872881	1
GO:0006357	regulation of transcription by RNA polymerase II	biological_process	biological regulation	11	6349	75	14485	0.146667	1	1
GO:0006366	transcription by RNA polymerase II	biological_process	cellular process	9	6349	30	14485	0.3	0.958896	1
GO:0006367	transcription initiation from RNA polymerase II promoter	biological_process	cellular process	1	6349	7	14485	0.142857	0.982382	1
GO:0006368	transcription elongation from RNA polymerase II promoter	biological_process	cellular process	5	6349	15	14485	0.333333	0.860503	1
GO:0006369	termination of RNA polymerase II transcription	biological_process	cellular process	1	6349	7	14485	0.142857	0.982382	1
GO:0006370	7-methylguanosine mRNA capping	biological_process	cellular process	1	6349	5	14485	0.2	0.944124	1
GO:0006396	RNA processing	biological_process	cellular process	16	6349	44	14485	0.363636	0.875919	1
GO:0006397	mRNA processing	biological_process	cellular process	82	6349	233	14485	0.351931	0.997197	1
GO:0006400	tRNA modification	biological_process	cellular process	6	6349	38	14485	0.157895	0.999947	1
GO:0006401	RNA catabolic process	biological_process	cellular process	4	6349	18	14485	0.222222	0.984691	1
GO:0006402	mRNA catabolic process	biological_process	biological regulation	2	6349	18	14485	0.111111	0.999537	1
GO:0006406	mRNA export from nucleus	biological_process	metabolic process	5	6349	19	14485	0.263158	0.964996	1
GO:0006415	translational termination	biological_process	cellular component organization or biogenesis	2	6349	11	14485	0.181818	0.983206	1
GO:0006417	regulation of translation	biological_process	cellular process	18	6349	49	14485	0.367347	0.874852	1
GO:0006426	glycyl-tRNA aminoacylation	biological_process	cellular process	1	6349	3	14485	0.333333	0.822823	1
GO:0006429	leucyl-tRNA aminoacylation	biological_process	cellular process	1	6349	3	14485	0.333333	0.822823	1
GO:0006430	lysyl-tRNA aminoacylation	biological_process	cellular process	1	6349	6	14485	0.166667	0.968624	1
GO:0006432	phenylalanyl-tRNA aminoacylation	biological_process	metabolic process	1	6349	4	14485	0.25	0.900499	1
GO:0006435	threonyl-tRNA aminoacylation	biological_process	cellular process	1	6349	3	14485	0.333333	0.822823	1
GO:0006446	regulation of translational initiation	biological_process	biological regulation	1	6349	3	14485	0.333333	0.822823	1
GO:0006465	signal peptide processing	biological_process	cellular process	2	6349	12	14485	0.166667	0.989804	1
GO:0006470	protein dephosphorylation	biological_process	cellular process	10	6349	36	14485	0.277778	0.984464	1
GO:0006486	protein glycosylation	biological_process	cellular process	48	6349	134	14485	0.358209	0.976091	1
GO:0006487	protein N-linked glycosylation	biological_process	cellular process	3	6349	28	14485	0.107143	0.999976	1
GO:0006490	oligosaccharide-lipid intermediate biosynthetic process	biological_process	cellular process	1	6349	4	14485	0.25	0.900499	1
GO:0006497	protein lipidation	biological_process	cellular process	1	6349	7	14485	0.142857	0.982382	1
GO:0006499	N-terminal protein myristoylation	biological_process	cellular process	1	6349	3	14485	0.333333	0.822823	1
GO:0006511	ubiquitin-dependent protein catabolic process	biological_process	metabolic process	50	6349	181	14485	0.276243	0.999998	1
GO:0006515	protein quality control for misfolded or incompletely synthesized proteins	biological_process	cellular process	3	6349	13	14485	0.230769	0.967577	1
GO:0006517	protein deglycosylation	biological_process	cellular process	1	6349	4	14485	0.25	0.900499	1
GO:0006518	peptide metabolic process	biological_process	metabolic process	2	6349	6	14485	0.333333	0.821624	1
GO:0006529	asparagine biosynthetic process	biological_process	cellular process	1	6349	3	14485	0.333333	0.822823	1
GO:0006531	aspartate metabolic process	biological_process	metabolic process	1	6349	5	14485	0.2	0.944124	1
GO:0006535	cysteine biosynthetic process from serine	biological_process	cellular process	5	6349	13	14485	0.384615	0.745493	1
GO:0006544	glycine metabolic process	biological_process	biological regulation	1	6349	5	14485	0.2	0.944124	1
GO:0006565	L-serine catabolic process	biological_process	cellular process	2	6349	6	14485	0.333333	0.821624	1
GO:0006571	tyrosine biosynthetic process	biological_process	cellular process	2	6349	6	14485	0.333333	0.821624	1
GO:0006574	valine catabolic process	biological_process	cellular process	3	6349	9	14485	0.333333	0.833444	1
GO:0006610	ribosomal protein import into nucleus	biological_process	localization	1	6349	3	14485	0.333333	0.822823	1
GO:0006612	protein targeting to membrane	biological_process	localization	9	6349	32	14485	0.28125	0.977781	1
GO:0006614	SRP-dependent cotranslational protein targeting to membrane	biological_process	localization	2	6349	11	14485	0.181818	0.983206	1
GO:0006616	SRP-dependent cotranslational protein targeting to membrane, translocation	biological_process	localization	3	6349	8	14485	0.375	0.75939	1
GO:0006620	posttranslational protein targeting to endoplasmic reticulum membrane	biological_process	localization	1	6349	7	14485	0.142857	0.982382	1
GO:0006621	protein retention in ER lumen	biological_process	biological regulation	2	6349	6	14485	0.333333	0.821624	1
GO:0006623	protein targeting to vacuole	biological_process	localization	8	6349	30	14485	0.266667	0.983403	1
GO:0006625	protein targeting to peroxisome	biological_process	cellular component organization or biogenesis	1	6349	7	14485	0.142857	0.982382	1
GO:0006626	protein targeting to mitochondrion	biological_process	cellular component organization or biogenesis	6	6349	16	14485	0.375	0.775216	1
GO:0006627	protein processing involved in protein targeting to mitochondrion	biological_process	cellular component organization or biogenesis	1	6349	5	14485	0.2	0.944124	1
GO:0006635	fatty acid beta-oxidation	biological_process	cellular process	18	6349	46	14485	0.391304	0.785106	1
GO:0006646	phosphatidylethanolamine biosynthetic process	biological_process	cellular process	3	6349	10	14485	0.3	0.886916	1
GO:0006665	sphingolipid metabolic process	biological_process	cellular process	3	6349	10	14485	0.3	0.886916	1
GO:0006672	ceramide metabolic process	biological_process	cellular process	2	6349	11	14485	0.181818	0.983206	1
GO:0006730	one-carbon metabolic process	biological_process	cellular process	7	6349	20	14485	0.35	0.846699	1
GO:0006739	NADP metabolic process	biological_process	cellular process	1	6349	3	14485	0.333333	0.822823	1
GO:0006744	ubiquinone biosynthetic process	biological_process	cellular process	4	6349	11	14485	0.363636	0.786817	1
GO:0006747	FAD biosynthetic process	biological_process	cellular process	1	6349	3	14485	0.333333	0.822823	1
GO:0006777	Mo-molybdopterin cofactor biosynthetic process	biological_process	cellular process	2	6349	8	14485	0.25	0.9283	1
GO:0006790	sulfur compound metabolic process	biological_process	cellular process	2	6349	9	14485	0.222222	0.955402	1
[truncated: 564 more rows]

## Sheet: Table S2B
Table S2B GO_cellular components enrichment information sheet
GO_C Term ID	GO_C Term Desc	GO_C Term Level1	GO_C Term Level2	Term Candidate Gene Num	Total Candidate Gene Num	Term Gene Num	Total Gene Num	Rich Ratio	P value	Q value
GO:0022625	cytosolic large ribosomal subunit	cellular_component	cell	83	6837	97	15639	0.85567	1.23921e-17	6.86524e-15
GO:0022626	cytosolic ribosome	cellular_component	cell	83	6837	107	15639	0.775701	8.25125e-13	1.52373e-10
GO:0022627	cytosolic small ribosomal subunit	cellular_component	cell	57	6837	66	15639	0.863636	7.07495e-13	1.52373e-10
GO:0005730	nucleolus	cellular_component	cell	208	6837	344	15639	0.604651	2.06832e-10	2.86462e-08
GO:0005886	plasma membrane	cellular_component	cell	1222	6837	2482	15639	0.492345	9.75154e-10	1.08047e-07
GO:0042788	polysomal ribosome	cellular_component	cell	46	6837	55	15639	0.836364	1.17061e-09	1.08087e-07
GO:0005840	ribosome	cellular_component	cell part	114	6837	175	15639	0.651429	7.81287e-09	6.18333e-07
GO:0005576	extracellular region	cellular_component	extracellular region	411	6837	779	15639	0.527599	1.23799e-07	8.57309e-06
GO:0000786	nucleosome	cellular_component	cell	54	6837	73	15639	0.739726	1.44209e-07	8.87689e-06
GO:0005618	cell wall	cellular_component	cell	259	6837	479	15639	0.54071	2.42385e-06	0.000134281
GO:0046658	anchored component of plasma membrane	cellular_component	cell	99	6837	161	15639	0.614907	3.88989e-06	0.000195909
GO:0031225	anchored component of membrane	cellular_component	membrane	94	6837	153	15639	0.614379	7.11563e-06	0.000328505
GO:0005874	microtubule	cellular_component	cell part	100	6837	167	15639	0.598802	1.76791e-05	0.000719267
GO:0009535	chloroplast thylakoid membrane	cellular_component	cell	163	6837	292	15639	0.558219	1.81764e-05	0.000719267
GO:0010598	NAD(P)H dehydrogenase complex (plastoquinone)	cellular_component	cell	13	6837	13	15639	1	2.11712e-05	0.000781922
GO:0005871	kinesin complex	cellular_component	cell	40	6837	57	15639	0.701754	4.74947e-05	0.0016445
GO:0009506	plasmodesma	cellular_component	cell junction	349	6837	685	15639	0.509489	5.9628e-05	0.00194317
GO:0009508	plastid chromosome	cellular_component	cell	10	6837	10	15639	1	0.000254072	0.00781976
GO:0005615	extracellular space	cellular_component	extracellular region part	64	6837	106	15639	0.603774	0.000394562	0.0115046
GO:0005832	chaperonin-containing T-complex	cellular_component	cell	9	6837	9	15639	1	0.000581596	0.0161102
GO:0033290	eukaryotic 48S preinitiation complex	cellular_component	cell part	15	6837	18	15639	0.833333	0.000682708	0.0180105
GO:0009574	preprophase band	cellular_component	cell part	11	6837	12	15639	0.916667	0.000798566	0.0201094
GO:0005635	nuclear envelope	cellular_component	cell	36	6837	55	15639	0.654545	0.000931724	0.0224424
GO:0090406	pollen tube	cellular_component	cell	31	6837	46	15639	0.673913	0.00100833	0.0232756
GO:0000307	cyclin-dependent protein kinase holoenzyme complex	cellular_component	cell	23	6837	32	15639	0.71875	0.00118128	0.024919
GO:0005887	integral component of plasma membrane	cellular_component	membrane	77	6837	135	15639	0.57037	0.00121446	0.024919
GO:0009534	chloroplast thylakoid	cellular_component	cell	65	6837	111	15639	0.585586	0.00113174	0.024919
GO:0016282	eukaryotic 43S preinitiation complex	cellular_component	cell	14	6837	17	15639	0.823529	0.00131565	0.026031
GO:0016020	membrane	cellular_component	membrane	461	6837	954	15639	0.483229	0.00176171	0.0336548
GO:0009524	phragmoplast	cellular_component	cell	58	6837	99	15639	0.585859	0.00200658	0.0370549
GO:0005819	spindle	cellular_component	cell	39	6837	64	15639	0.609375	0.0040756	0.072835
GO:0005852	eukaryotic translation initiation factor 3 complex	cellular_component	cell	12	6837	15	15639	0.8	0.00472825	0.0818578
GO:0000930	gamma-tubulin complex	cellular_component	cell	6	6837	6	15639	1	0.00697273	0.104099
GO:0005663	DNA replication factor C complex	cellular_component	cell	8	6837	9	15639	0.888889	0.00732825	0.104099
GO:0005664	nuclear origin of replication recognition complex	cellular_component	cell	6	6837	6	15639	1	0.00697273	0.104099
GO:0005680	anaphase-promoting complex	cellular_component	organelle	8	6837	9	15639	0.888889	0.00732825	0.104099
GO:0005828	kinetochore microtubule	cellular_component	cell	6	6837	6	15639	1	0.00697273	0.104099
GO:0016324	apical plasma membrane	cellular_component	cell part	13	6837	17	15639	0.764706	0.00638703	0.104099
GO:0033597	mitotic checkpoint complex	cellular_component	cell	6	6837	6	15639	1	0.00697273	0.104099
GO:0010369	chromocenter	cellular_component	cell	11	6837	14	15639	0.785714	0.00879211	0.121771
GO:0000777	condensed chromosome kinetochore	cellular_component	cell	9	6837	11	15639	0.818182	0.0118289	0.159835
GO:0005694	chromosome	cellular_component	cell	27	6837	44	15639	0.613636	0.0138168	0.178012
GO:0009295	nucleoid	cellular_component	nucleoid	13	6837	18	15639	0.722222	0.0138129	0.178012
GO:0000177	cytoplasmic exosome (RNase complex)	cellular_component	cell	7	6837	8	15639	0.875	0.0150559	0.185355
GO:0000922	spindle pole	cellular_component	cell	7	6837	8	15639	0.875	0.0150559	0.185355
GO:0000808	origin recognition complex	cellular_component	cell	5	6837	5	15639	1	0.015956	0.188078
GO:0032040	small-subunit processome	cellular_component	protein-containing complex	20	6837	31	15639	0.645161	0.0158144	0.188078
GO:0000776	kinetochore	cellular_component	cell	8	6837	10	15639	0.8	0.022524	0.254659
GO:0005740	mitochondrial envelope	cellular_component	cell	8	6837	10	15639	0.8	0.022524	0.254659
GO:0010287	plastoglobule	cellular_component	cell	42	6837	76	15639	0.552632	0.0280062	0.310309
GO:0000427	plastid-encoded plastid RNA polymerase complex	cellular_component	cell	6	6837	7	15639	0.857143	0.0305283	0.313198
GO:0030686	90S preribosome	cellular_component	protein-containing complex	6	6837	7	15639	0.857143	0.0305283	0.313198
GO:0031080	nuclear pore outer ring	cellular_component	cell	6	6837	7	15639	0.857143	0.0305283	0.313198
GO:0042555	MCM complex	cellular_component	protein-containing complex	6	6837	7	15639	0.857143	0.0305283	0.313198
GO:0009317	acetyl-CoA carboxylase complex	cellular_component	cell	4	6837	4	15639	1	0.03651	0.342823
GO:0031429	box H/ACA snoRNP complex	cellular_component	membrane-enclosed lumen	4	6837	4	15639	1	0.03651	0.342823
GO:0051233	spindle midzone	cellular_component	cell	4	6837	4	15639	1	0.03651	0.342823
GO:0090404	pollen tube tip	cellular_component	cell	4	6837	4	15639	1	0.03651	0.342823
GO:0097268	cytoophidium	cellular_component	cell	4	6837	4	15639	1	0.03651	0.342823
GO:0000176	nuclear exosome (RNase complex)	cellular_component	cell	7	6837	9	15639	0.777778	0.0421026	0.388748
GO:0005813	centrosome	cellular_component	cell	15	6837	24	15639	0.625	0.049941	0.453563
GO:0030133	transport vesicle	cellular_component	cell	8	6837	11	15639	0.727273	0.0510441	0.456104
GO:0005764	lysosome	cellular_component	cell	18	6837	30	15639	0.6	0.0536755	0.472004
GO:0048046	apoplast	cellular_component	extracellular region	159	6837	330	15639	0.481818	0.0555279	0.480664
GO:0031428	box C/D snoRNP complex	cellular_component	cell part	5	6837	6	15639	0.833333	0.0608726	0.518822
GO:0005856	cytoskeleton	cellular_component	cell	36	6837	67	15639	0.537313	0.0632252	0.530708
GO:0000923	equatorial microtubule organizing center	cellular_component	cell	3	6837	3	15639	1	0.0835339	0.593092
GO:0005654	nucleoplasm	cellular_component	cell	58	6837	115	15639	0.504348	0.0867981	0.593092
GO:0005658	alpha DNA polymerase:primase complex	cellular_component	cell	3	6837	3	15639	1	0.0835339	0.593092
GO:0005732	small nucleolar ribonucleoprotein complex	cellular_component	protein-containing complex	6	6837	8	15639	0.75	0.0769455	0.593092
GO:0005853	eukaryotic translation elongation factor 1 complex	cellular_component	cell	3	6837	3	15639	1	0.0835339	0.593092
GO:0005881	cytoplasmic microtubule	cellular_component	cell	3	6837	3	15639	1	0.0835339	0.593092
GO:0005884	actin filament	cellular_component	cell	7	6837	10	15639	0.7	0.0877862	0.593092
GO:0005971	ribonucleoside-diphosphate reductase complex	cellular_component	cell	3	6837	3	15639	1	0.0835339	0.593092
GO:0009360	DNA polymerase III complex	cellular_component	protein-containing complex	3	6837	3	15639	1	0.0835339	0.593092
GO:0009570	chloroplast stroma	cellular_component	cell part	189	6837	400	15639	0.4725	0.0822456	0.593092
GO:0012506	vesicle membrane	cellular_component	membrane	3	6837	3	15639	1	0.0835339	0.593092
GO:0015629	actin cytoskeleton	cellular_component	cell	6	6837	8	15639	0.75	0.0769455	0.593092
GO:0015935	small ribosomal subunit	cellular_component	cell	7	6837	10	15639	0.7	0.0877862	0.593092
GO:0035061	interchromatin granule	cellular_component	cell	3	6837	3	15639	1	0.0835339	0.593092
GO:0035618	root hair	cellular_component	cell	3	6837	3	15639	1	0.0835339	0.593092
GO:0071944	cell periphery	cellular_component	cell	7	6837	10	15639	0.7	0.0877862	0.593092
GO:0016604	nuclear body	cellular_component	cell	9	6837	14	15639	0.642857	0.100284	0.6614
GO:0032541	cortical endoplasmic reticulum	cellular_component	cell	9	6837	14	15639	0.642857	0.100284	0.6614
GO:1990904	ribonucleoprotein complex	cellular_component	protein-containing complex	34	6837	65	15639	0.523077	0.101756	0.66321
GO:0009504	cell plate	cellular_component	cell	18	6837	32	15639	0.5625	0.105663	0.680664
GO:0000109	nucleotide-excision repair complex	cellular_component	cell	4	6837	5	15639	0.8	0.118726	0.730823
GO:0000793	condensed chromosome	cellular_component	cell	4	6837	5	15639	0.8	0.118726	0.730823
GO:0005662	DNA replication factor A complex	cellular_component	cell	4	6837	5	15639	0.8	0.118726	0.730823
GO:0070545	PeBoW complex	cellular_component	cell	4	6837	5	15639	0.8	0.118726	0.730823
GO:0005815	microtubule organizing center	cellular_component	cell	5	6837	7	15639	0.714286	0.136734	0.823373
GO:0009986	cell surface	cellular_component	cell	5	6837	7	15639	0.714286	0.136734	0.823373
GO:0043231	intracellular membrane-bounded organelle	cellular_component	cell part	57	6837	116	15639	0.491379	0.138561	0.825409
GO:0000780	condensed nuclear chromosome, centromeric region	cellular_component	cell	2	6837	2	15639	1	0.191107	0.840266
GO:0000796	condensin complex	cellular_component	cell	2	6837	2	15639	1	0.191107	0.840266
GO:0005622	intracellular	cellular_component	cell	2	6837	2	15639	1	0.191107	0.840266
GO:0005637	nuclear inner membrane	cellular_component	cell	2	6837	2	15639	1	0.191107	0.840266
GO:0005640	nuclear outer membrane	cellular_component	cell	2	6837	2	15639	1	0.191107	0.840266
GO:0005656	nuclear pre-replicative complex	cellular_component	cell	2	6837	2	15639	1	0.191107	0.840266
GO:0005736	RNA polymerase I complex	cellular_component	cell part	7	6837	11	15639	0.636364	0.152085	0.840266
GO:0005872	minus-end kinesin complex	cellular_component	cell	2	6837	2	15639	1	0.191107	0.840266
GO:0005950	anthranilate synthase complex	cellular_component	cell	2	6837	2	15639	1	0.191107	0.840266
GO:0005955	calcineurin complex	cellular_component	cell	2	6837	2	15639	1	0.191107	0.840266
GO:0008274	gamma-tubulin ring complex	cellular_component	cell	2	6837	2	15639	1	0.191107	0.840266
GO:0008275	gamma-tubulin small complex	cellular_component	cell	2	6837	2	15639	1	0.191107	0.840266
GO:0008622	epsilon DNA polymerase complex	cellular_component	cell	2	6837	2	15639	1	0.191107	0.840266
GO:0009344	nitrite reductase complex [NAD(P)H]	cellular_component	protein-containing complex	2	6837	2	15639	1	0.191107	0.840266
GO:0019822	P4 peroxisome	cellular_component	cell	2	6837	2	15639	1	0.191107	0.840266
GO:0030093	chloroplast photosystem I	cellular_component	cell	2	6837	2	15639	1	0.191107	0.840266
GO:0030690	Noc1p-Noc2p complex	cellular_component	cell	2	6837	2	15639	1	0.191107	0.840266
GO:0030863	cortical cytoskeleton	cellular_component	cell	2	6837	2	15639	1	0.191107	0.840266
GO:0030981	cortical microtubule cytoskeleton	cellular_component	cell	2	6837	2	15639	1	0.191107	0.840266
GO:0031021	interphase microtubule organizing center	cellular_component	cell	2	6837	2	15639	1	0.191107	0.840266
GO:0031510	SUMO activating enzyme complex	cellular_component	cell	2	6837	2	15639	1	0.191107	0.840266
GO:0031616	spindle pole centrosome	cellular_component	cell	2	6837	2	15639	1	0.191107	0.840266
GO:0032133	chromosome passenger complex	cellular_component	cell	2	6837	2	15639	1	0.191107	0.840266
GO:0033186	CAF-1 complex	cellular_component	protein-containing complex	2	6837	2	15639	1	0.191107	0.840266
GO:0035371	microtubule plus-end	cellular_component	cell part	2	6837	2	15639	1	0.191107	0.840266
GO:0042719	mitochondrial intermembrane space protein transporter complex	cellular_component	cell	2	6837	2	15639	1	0.191107	0.840266
GO:0044611	nuclear pore inner ring	cellular_component	cell	2	6837	2	15639	1	0.191107	0.840266
GO:0055028	cortical microtubule	cellular_component	cell	9	6837	15	15639	0.6	0.15595	0.840266
GO:0090568	nuclear transcriptional repressor complex	cellular_component	cell	2	6837	2	15639	1	0.191107	0.840266
GO:0098572	stromal side of plastid thylakoid membrane	cellular_component	cell	2	6837	2	15639	1	0.191107	0.840266
GO:0099080	supramolecular complex	cellular_component	supramolecular complex	2	6837	2	15639	1	0.191107	0.840266
GO:1903293	phosphatase complex	cellular_component	protein-containing complex	2	6837	2	15639	1	0.191107	0.840266
GO:1990298	bub1-bub3 complex	cellular_component	protein-containing complex	2	6837	2	15639	1	0.191107	0.840266
GO:0000500	RNA polymerase I upstream activating factor complex	cellular_component	cell	3	6837	4	15639	0.75	0.224605	0.860522
GO:0005643	nuclear pore	cellular_component	organelle	14	6837	26	15639	0.538462	0.198833	0.860522
GO:0005666	RNA polymerase III complex	cellular_component	cell	8	6837	14	15639	0.571429	0.22765	0.860522
GO:0005685	U1 snRNP	cellular_component	cell	10	6837	18	15639	0.555556	0.218318	0.860522
GO:0005687	U4 snRNP	cellular_component	cell	6	6837	10	15639	0.6	0.234899	0.860522
GO:0005742	mitochondrial outer membrane translocase complex	cellular_component	cell	6	6837	10	15639	0.6	0.234899	0.860522
GO:0005782	peroxisomal matrix	cellular_component	cell	3	6837	4	15639	0.75	0.224605	0.860522
GO:0005850	eukaryotic translation initiation factor 2 complex	cellular_component	cell	3	6837	4	15639	0.75	0.224605	0.860522
GO:0005876	spindle microtubule	cellular_component	cell	6	6837	10	15639	0.6	0.234899	0.860522
GO:0005930	axoneme	cellular_component	cell	5	6837	8	15639	0.625	0.23638	0.860522
GO:0005947	mitochondrial alpha-ketoglutarate dehydrogenase complex	cellular_component	cell	3	6837	4	15639	0.75	0.224605	0.860522
GO:0009505	plant-type cell wall	cellular_component	cell	109	6837	234	15639	0.465812	0.204926	0.860522
GO:0010005	cortical microtubule, transverse to long axis	cellular_component	cell part	4	6837	6	15639	0.666667	0.234432	0.860522
GO:0010319	stromule	cellular_component	cell	8	6837	14	15639	0.571429	0.22765	0.860522
GO:0012505	endomembrane system	cellular_component	cell part	42	6837	87	15639	0.482759	0.225783	0.860522
GO:0015934	large ribosomal subunit	cellular_component	cell	6	6837	10	15639	0.6	0.234899	0.860522
GO:0017101	aminoacyl-tRNA synthetase multienzyme complex	cellular_component	cell	3	6837	4	15639	0.75	0.224605	0.860522
GO:0030286	dynein complex	cellular_component	cell	5	6837	8	15639	0.625	0.23638	0.860522
GO:0031436	BRCA1-BARD1 complex	cellular_component	cell	3	6837	4	15639	0.75	0.224605	0.860522
GO:0031464	Cul4A-RING E3 ubiquitin ligase complex	cellular_component	cell	5	6837	8	15639	0.625	0.23638	0.860522
GO:0032300	mismatch repair complex	cellular_component	cell	5	6837	8	15639	0.625	0.23638	0.860522
GO:0034715	pICln-Sm protein complex	cellular_component	cell	3	6837	4	15639	0.75	0.224605	0.860522
GO:0042721	TIM22 mitochondrial import inner membrane insertion complex	cellular_component	cell part	5	6837	8	15639	0.625	0.23638	0.860522
GO:0070531	BRCA1-A complex	cellular_component	cell	3	6837	4	15639	0.75	0.224605	0.860522
GO:0080008	Cul4-RING E3 ubiquitin ligase complex	cellular_component	cell	23	6837	46	15639	0.5	0.237653	0.860522
GO:0097014	ciliary plasm	cellular_component	cell	5	6837	8	15639	0.625	0.23638	0.860522
GO:0098687	chromosomal region	cellular_component	cell	3	6837	4	15639	0.75	0.224605	0.860522
GO:0009579	thylakoid	cellular_component	cell	54	6837	114	15639	0.473684	0.243299	0.875244
GO:0000152	nuclear ubiquitin ligase complex	cellular_component	cell	1	6837	1	15639	1	0.437176	0.946077
GO:0000153	cytoplasmic ubiquitin ligase complex	cellular_component	cell	1	6837	1	15639	1	0.437176	0.946077
GO:0000214	tRNA-intron endonuclease complex	cellular_component	cell	1	6837	1	15639	1	0.437176	0.946077
GO:0000243	commitment complex	cellular_component	cell	3	6837	5	15639	0.6	0.383425	0.946077
GO:0000324	fungal-type vacuole	cellular_component	cell	1	6837	1	15639	1	0.437176	0.946077
GO:0000333	telomerase catalytic core complex	cellular_component	cell	1	6837	1	15639	1	0.437176	0.946077
GO:0000418	RNA polymerase IV complex	cellular_component	cell	5	6837	9	15639	0.555556	0.348566	0.946077
GO:0000419	RNA polymerase V complex	cellular_component	cell	10	6837	20	15639	0.5	0.363773	0.946077
GO:0000775	chromosome, centromeric region	cellular_component	cell	14	6837	28	15639	0.5	0.313771	0.946077
GO:0000778	condensed nuclear chromosome kinetochore	cellular_component	cell part	2	6837	3	15639	0.666667	0.406254	0.946077
GO:0000781	chromosome, telomeric region	cellular_component	cell	7	6837	13	15639	0.538462	0.321379	0.946077
GO:0000791	euchromatin	cellular_component	cell part	1	6837	1	15639	1	0.437176	0.946077
GO:0000794	condensed nuclear chromosome	cellular_component	cell	9	6837	17	15639	0.529412	0.298714	0.946077
GO:0000799	nuclear condensin complex	cellular_component	cell	1	6837	1	15639	1	0.437176	0.946077
GO:0000811	GINS complex	cellular_component	cell	1	6837	1	15639	1	0.437176	0.946077
GO:0000818	nuclear MIS12/MIND complex	cellular_component	cell	1	6837	1	15639	1	0.437176	0.946077
GO:0001411	hyphal tip	cellular_component	cell	1	6837	1	15639	1	0.437176	0.946077
GO:0001673	male germ cell nucleus	cellular_component	cell	2	6837	3	15639	0.666667	0.406254	0.946077
GO:0005712	chiasma	cellular_component	cell part	1	6837	1	15639	1	0.437176	0.946077
GO:0005719	nuclear euchromatin	cellular_component	cell part	4	6837	7	15639	0.571429	0.364697	0.946077
GO:0005720	nuclear heterochromatin	cellular_component	cell	2	6837	3	15639	0.666667	0.406254	0.946077
GO:0005761	mitochondrial ribosome	cellular_component	cell	1	6837	1	15639	1	0.437176	0.946077
GO:0005814	centriole	cellular_component	cell	1	6837	1	15639	1	0.437176	0.946077
GO:0005835	fatty acid synthase complex	cellular_component	cell	1	6837	1	15639	1	0.437176	0.946077
GO:0005846	nuclear cap binding complex	cellular_component	cell	2	6837	3	15639	0.666667	0.406254	0.946077
GO:0005854	nascent polypeptide-associated complex	cellular_component	cell part	2	6837	3	15639	0.666667	0.406254	0.946077
GO:0005911	cell-cell junction	cellular_component	cell junction	1	6837	1	15639	1	0.437176	0.946077
GO:0005948	acetolactate synthase complex	cellular_component	cell	1	6837	1	15639	1	0.437176	0.946077
GO:0005960	glycine cleavage complex	cellular_component	cell	2	6837	3	15639	0.666667	0.406254	0.946077
GO:0009507	chloroplast	cellular_component	cell	681	6837	1533	15639	0.444227	0.287912	0.946077
GO:0009509	chromoplast	cellular_component	cell	3	6837	5	15639	0.6	0.383425	0.946077
GO:0009514	glyoxysome	cellular_component	cell	8	6837	16	15639	0.5	0.396079	0.946077
GO:0009537	proplastid	cellular_component	cell	1	6837	1	15639	1	0.437176	0.946077
GO:0009575	chromoplast stroma	cellular_component	cell	1	6837	1	15639	1	0.437176	0.946077
GO:0009578	etioplast stroma	cellular_component	cell	1	6837	1	15639	1	0.437176	0.946077
GO:0009782	photosystem I antenna complex	cellular_component	cell	1	6837	1	15639	1	0.437176	0.946077
GO:0009842	cyanelle	cellular_component	cell	1	6837	1	15639	1	0.437176	0.946077
GO:0009930	longitudinal side of cell surface	cellular_component	cell	1	6837	1	15639	1	0.437176	0.946077
GO:0010368	chloroplast isoamylase complex	cellular_component	cell	1	6837	1	15639	1	0.437176	0.946077
GO:0012511	monolayer-surrounded lipid storage body	cellular_component	cell	6	6837	12	15639	0.5	0.43683	0.946077
GO:0015630	microtubule cytoskeleton	cellular_component	cell	2	6837	3	15639	0.666667	0.406254	0.946077
GO:0016459	myosin complex	cellular_component	cell	8	6837	15	15639	0.533333	0.309592	0.946077
GO:0019013	viral nucleocapsid	cellular_component	virion	3	6837	5	15639	0.6	0.383425	0.946077
GO:0019908	nuclear cyclin-dependent protein kinase holoenzyme complex	cellular_component	cell	1	6837	1	15639	1	0.437176	0.946077
GO:0030136	clathrin-coated vesicle	cellular_component	cell	16	6837	33	15639	0.484848	0.351031	0.946077
GO:0030532	small nuclear ribonucleoprotein complex	cellular_component	cell part	1	6837	1	15639	1	0.437176	0.946077
GO:0030687	preribosome, large subunit precursor	cellular_component	protein-containing complex	12	6837	23	15639	0.521739	0.270257	0.946077
GO:0030691	Noc2p-Noc3p complex	cellular_component	cell	1	6837	1	15639	1	0.437176	0.946077
GO:0030692	Noc4p-Nop14p complex	cellular_component	cell	1	6837	1	15639	1	0.437176	0.946077
GO:0030894	replisome	cellular_component	cell	1	6837	1	15639	1	0.437176	0.946077
GO:0030956	glutamyl-tRNA(Gln) amidotransferase complex	cellular_component	cell	3	6837	5	15639	0.6	0.383425	0.946077
GO:0031261	DNA replication preinitiation complex	cellular_component	cell	1	6837	1	15639	1	0.437176	0.946077
GO:0031303	integral component of endosome membrane	cellular_component	cell	1	6837	1	15639	1	0.437176	0.946077
GO:0031304	intrinsic component of mitochondrial inner membrane	cellular_component	cell	1	6837	1	15639	1	0.437176	0.946077
GO:0031390	Ctf18 RFC-like complex	cellular_component	cell	1	6837	1	15639	1	0.437176	0.946077
GO:0031422	RecQ helicase-Topo III complex	cellular_component	cell	2	6837	3	15639	0.666667	0.406254	0.946077
GO:0031431	Dbf4-dependent protein kinase complex	cellular_component	cell part	1	6837	1	15639	1	0.437176	0.946077
GO:0031465	Cul4B-RING E3 ubiquitin ligase complex	cellular_component	protein-containing complex	1	6837	1	15639	1	0.437176	0.946077
GO:0031982	vesicle	cellular_component	organelle	7	6837	14	15639	0.5	0.415109	0.946077
GO:0032299	ribonuclease H2 complex	cellular_component	cell	1	6837	1	15639	1	0.437176	0.946077
GO:0032301	MutSalpha complex	cellular_component	cell	1	6837	1	15639	1	0.437176	0.946077
GO:0032302	MutSbeta complex	cellular_component	cell	1	6837	1	15639	1	0.437176	0.946077
GO:0032389	MutLalpha complex	cellular_component	cell	1	6837	1	15639	1	0.437176	0.946077
GO:0032432	actin filament bundle	cellular_component	cell	3	6837	5	15639	0.6	0.383425	0.946077
GO:0032586	protein storage vacuole membrane	cellular_component	cell	7	6837	14	15639	0.5	0.415109	0.946077
GO:0032797	SMN complex	cellular_component	cell	1	6837	1	15639	1	0.437176	0.946077
GO:0033065	Rad51C-XRCC3 complex	cellular_component	cell	1	6837	1	15639	1	0.437176	0.946077
GO:0033097	amyloplast membrane	cellular_component	organelle part	1	6837	1	15639	1	0.437176	0.946077
GO:0033588	Elongator holoenzyme complex	cellular_component	cell part	4	6837	7	15639	0.571429	0.364697	0.946077
GO:0034245	mitochondrial DNA-directed RNA polymerase complex	cellular_component	cell	1	6837	1	15639	1	0.437176	0.946077
GO:0034388	Pwp2p-containing subcomplex of 90S preribosome	cellular_component	cell	3	6837	5	15639	0.6	0.383425	0.946077
GO:0034399	nuclear periphery	cellular_component	cell	7	6837	14	15639	0.5	0.415109	0.946077
GO:0034455	t-UTP complex	cellular_component	cell	1	6837	1	15639	1	0.437176	0.946077
GO:0034709	methylosome	cellular_component	cell	1	6837	1	15639	1	0.437176	0.946077
GO:0034719	SMN-Sm protein complex	cellular_component	cell	3	6837	5	15639	0.6	0.383425	0.946077
GO:0035101	FACT complex	cellular_component	cell	2	6837	3	15639	0.666667	0.406254	0.946077
GO:0035339	SPOTS complex	cellular_component	cell	2	6837	3	15639	0.666667	0.406254	0.946077
GO:0035448	extrinsic component of thylakoid membrane	cellular_component	cell	1	6837	1	15639	1	0.437176	0.946077
GO:0035649	Nrd1 complex	cellular_component	protein-containing complex	1	6837	1	15639	1	0.437176	0.946077
GO:0035859	Seh1-associated complex	cellular_component	protein-containing complex	1	6837	1	15639	1	0.437176	0.946077
GO:0036396	RNA N6-methyladenosine methyltransferase complex	cellular_component	cell	1	6837	1	15639	1	0.437176	0.946077
GO:0036410	Mst2 histone acetyltransferase complex	cellular_component	cell part	1	6837	1	15639	1	0.437176	0.946077
GO:0043033	isoamylase complex	cellular_component	protein-containing complex	1	6837	1	15639	1	0.437176	0.946077
GO:0043036	starch grain	cellular_component	cell	1	6837	1	15639	1	0.437176	0.946077
GO:0043528	tRNA (m2G10) methyltransferase complex	cellular_component	cell	1	6837	1	15639	1	0.437176	0.946077
GO:0043614	multi-eIF complex	cellular_component	cell	1	6837	1	15639	1	0.437176	0.946077
GO:0043626	PCNA complex	cellular_component	cell	1	6837	1	15639	1	0.437176	0.946077
GO:0043661	peribacteroid membrane	cellular_component	cell	3	6837	5	15639	0.6	0.383425	0.946077
GO:0044613	nuclear pore central transport channel	cellular_component	cell	5	6837	9	15639	0.555556	0.348566	0.946077
GO:0045177	apical part of cell	cellular_component	cell	2	6837	3	15639	0.666667	0.406254	0.946077
GO:0045298	tubulin complex	cellular_component	cell	1	6837	1	15639	1	0.437176	0.946077
GO:0061574	ASAP complex	cellular_component	protein-containing complex	1	6837	1	15639	1	0.437176	0.946077
GO:0061673	mitotic spindle astral microtubule	cellular_component	cell	1	6837	1	15639	1	0.437176	0.946077
GO:0070176	DRM complex	cellular_component	cell	1	6837	1	15639	1	0.437176	0.946077
GO:0070209	ASTRA complex	cellular_component	cell	1	6837	1	15639	1	0.437176	0.946077
GO:0070382	exocytic vesicle	cellular_component	cell	2	6837	3	15639	0.666667	0.406254	0.946077
GO:0071541	eukaryotic translation initiation factor 3 complex, eIF3m	cellular_component	cell part	2	6837	3	15639	0.666667	0.406254	0.946077
GO:0090661	box H/ACA telomerase RNP complex	cellular_component	cell	1	6837	1	15639	1	0.437176	0.946077
GO:0097255	R2TP complex	cellular_component	protein-containing complex	2	6837	3	15639	0.666667	0.406254	0.946077
GO:0097344	Rix1 complex	cellular_component	protein-containing complex	1	6837	1	15639	1	0.437176	0.946077
GO:0097431	mitotic spindle pole	cellular_component	cell	1	6837	1	15639	1	0.437176	0.946077
GO:1990023	mitotic spindle midzone	cellular_component	cell	1	6837	1	15639	1	0.437176	0.946077
GO:0015030	Cajal body	cellular_component	cell	5	6837	10	15639	0.5	0.462234	0.992548
GO:0072686	mitotic spindle	cellular_component	cell	5	6837	10	15639	0.5	0.462234	0.992548
GO:0009707	chloroplast outer membrane	cellular_component	cell	20	6837	44	15639	0.454545	0.465485	0.99567
GO:0000015	phosphopyruvate hydratase complex	cellular_component	cell	1	6837	4	15639	0.25	0.899686	1
GO:0000118	histone deacetylase complex	cellular_component	cell	1	6837	12	15639	0.0833333	0.998993	1
GO:0000123	histone acetyltransferase complex	cellular_component	cell	3	6837	8	15639	0.375	0.757324	1
GO:0000138	Golgi trans cisterna	cellular_component	cell part	1	6837	6	15639	0.166667	0.968238	1
GO:0000139	Golgi membrane	cellular_component	cell	128	6837	422	15639	0.303318	1	1
GO:0000145	exocyst	cellular_component	cell part	9	6837	35	15639	0.257143	0.99138	1
GO:0000148	1,3-beta-D-glucan synthase complex	cellular_component	cell	3	6837	9	15639	0.333333	0.8317	1
GO:0000151	ubiquitin ligase complex	cellular_component	cell	4	6837	21	15639	0.190476	0.995627	1
GO:0000159	protein phosphatase type 2A complex	cellular_component	cell	2	6837	22	15639	0.0909091	0.999942	1
GO:0000172	ribonuclease MRP complex	cellular_component	protein-containing complex	1	6837	2	15639	0.5	0.683245	1
GO:0000178	exosome (RNase complex)	cellular_component	cell	3	6837	6	15639	0.5	0.532417	1
GO:0000220	vacuolar proton-transporting V-type ATPase, V0 domain	cellular_component	cell	1	6837	6	15639	0.166667	0.968238	1
GO:0000275	mitochondrial proton-transporting ATP synthase complex, catalytic core F(1)	cellular_component	cell	2	6837	5	15639	0.4	0.724222	1
GO:0000306	extrinsic component of vacuolar membrane	cellular_component	organelle part	1	6837	6	15639	0.166667	0.968238	1
GO:0000325	plant-type vacuole	cellular_component	cell	8	6837	32	15639	0.25	0.99136	1
GO:0000326	protein storage vacuole	cellular_component	cell	4	6837	11	15639	0.363636	0.784569	1
GO:0000347	THO complex	cellular_component	cell	2	6837	9	15639	0.222222	0.954761	1
GO:0000407	phagophore assembly site	cellular_component	cell	2	6837	12	15639	0.166667	0.989595	1
GO:0000408	EKC/KEOPS complex	cellular_component	cell	1	6837	4	15639	0.25	0.899686	1
GO:0000421	autophagosome membrane	cellular_component	cell	3	6837	9	15639	0.333333	0.8317	1
GO:0000439	transcription factor TFIIH core complex	cellular_component	cell	1	6837	4	15639	0.25	0.899686	1
GO:0000502	proteasome complex	cellular_component	cell	9	6837	43	15639	0.209302	0.999521	1
GO:0000784	nuclear chromosome, telomeric region	cellular_component	cell	4	6837	12	15639	0.333333	0.845265	1
GO:0000785	chromatin	cellular_component	cell	11	6837	47	15639	0.234043	0.998888	1
GO:0000790	nuclear chromatin	cellular_component	cell	14	6837	36	15639	0.388889	0.773073	1
GO:0000792	heterochromatin	cellular_component	cell	2	6837	4	15639	0.5	0.587903	1
GO:0000795	synaptonemal complex	cellular_component	cell part	1	6837	3	15639	0.333333	0.821741	1
GO:0000812	Swr1 complex	cellular_component	cell	2	6837	7	15639	0.285714	0.884892	1
GO:0000815	ESCRT III complex	cellular_component	cell	3	6837	11	15639	0.272727	0.923369	1
GO:0000932	P-body	cellular_component	cell	13	6837	71	15639	0.183099	0.999999	1
GO:0000943	retrotransposon nucleocapsid	cellular_component	cell part	12	6837	185	15639	0.0648649	1	1
GO:0000974	Prp19 complex	cellular_component	protein-containing complex	3	6837	11	15639	0.272727	0.923369	1
GO:0001405	PAM complex, Tim23 associated import motor	cellular_component	cell	2	6837	7	15639	0.285714	0.884892	1
GO:0002189	ribose phosphate diphosphokinase complex	cellular_component	protein-containing complex	2	6837	4	15639	0.5	0.587903	1
GO:0005623	cell	cellular_component	cell	22	6837	54	15639	0.407407	0.717256	1
GO:0005628	prospore membrane	cellular_component	cell	1	6837	3	15639	0.333333	0.821741	1
GO:0005634	nucleus	cellular_component	cell	1850	6837	4268	15639	0.433458	0.723119	1
GO:0005655	nucleolar ribonuclease P complex	cellular_component	cell	1	6837	2	15639	0.5	0.683245	1
GO:0005657	replication fork	cellular_component	cell	4	6837	9	15639	0.444444	0.608573	1
GO:0005665	RNA polymerase II, core complex	cellular_component	cell	6	6837	15	15639	0.4	0.705535	1
GO:0005667	transcription factor complex	cellular_component	cell	3	6837	11	15639	0.272727	0.923369	1
GO:0005669	transcription factor TFIID complex	cellular_component	cell	1	6837	16	15639	0.0625	0.999899	1
GO:0005675	transcription factor TFIIH holo complex	cellular_component	cell	2	6837	9	15639	0.222222	0.954761	1
GO:0005677	chromatin silencing complex	cellular_component	cell	1	6837	5	15639	0.2	0.943552	1
GO:0005681	spliceosomal complex	cellular_component	cell	39	6837	99	15639	0.393939	0.834322	1
GO:0005682	U5 snRNP	cellular_component	cell	8	6837	19	15639	0.421053	0.641711	1
GO:0005686	U2 snRNP	cellular_component	cell	9	6837	23	15639	0.391304	0.741327	1
GO:0005688	U6 snRNP	cellular_component	cell	3	6837	8	15639	0.375	0.757324	1
GO:0005689	U12-type spliceosomal complex	cellular_component	cell part	4	6837	14	15639	0.285714	0.924122	1
GO:0005737	cytoplasm	cellular_component	cell	899	6837	2084	15639	0.431382	0.72442	1
GO:0005739	mitochondrion	cellular_component	cell	370	6837	1002	15639	0.369261	0.999997	1
GO:0005741	mitochondrial outer membrane	cellular_component	cell	18	6837	45	15639	0.4	0.742017	1
GO:0005743	mitochondrial inner membrane	cellular_component	cell	41	6837	127	15639	0.322835	0.996872	1
GO:0005744	TIM23 mitochondrial import inner membrane translocase complex	cellular_component	cell	4	6837	16	15639	0.25	0.964761	1
GO:0005746	mitochondrial respiratory chain	cellular_component	cell	1	6837	2	15639	0.5	0.683245	1
GO:0005747	mitochondrial respiratory chain complex I	cellular_component	cell	5	6837	37	15639	0.135135	0.999984	1
GO:0005758	mitochondrial intermembrane space	cellular_component	cell	11	6837	30	15639	0.366667	0.83214	1
GO:0005759	mitochondrial matrix	cellular_component	cell	32	6837	76	15639	0.421053	0.65377	1
GO:0005762	mitochondrial large ribosomal subunit	cellular_component	cell	4	6837	12	15639	0.333333	0.845265	1
GO:0005765	lysosomal membrane	cellular_component	cell	6	6837	20	15639	0.3	0.930816	1
GO:0005768	endosome	cellular_component	cell	88	6837	270	15639	0.325926	0.999936	1
GO:0005769	early endosome	cellular_component	cell	9	6837	35	15639	0.257143	0.99138	1
GO:0005770	late endosome	cellular_component	cell	14	6837	47	15639	0.297872	0.982577	1
GO:0005771	multivesicular body	cellular_component	cell	3	6837	20	15639	0.15	0.998673	1
GO:0005773	vacuole	cellular_component	cell	177	6837	409	15639	0.432763	0.591305	1
GO:0005774	vacuolar membrane	cellular_component	organelle part	165	6837	378	15639	0.436508	0.53065	1
GO:0005775	vacuolar lumen	cellular_component	cell	2	6837	4	15639	0.5	0.587903	1
GO:0005776	autophagosome	cellular_component	cell	2	6837	10	15639	0.2	0.972073	1
GO:0005777	peroxisome	cellular_component	cell part	69	6837	162	15639	0.425926	0.643115	1
GO:0005778	peroxisomal membrane	cellular_component	cell	8	6837	37	15639	0.216216	0.998611	1
GO:0005779	integral component of peroxisomal membrane	cellular_component	cell	3	6837	13	15639	0.230769	0.966982	1
GO:0005783	endoplasmic reticulum	cellular_component	cell part	233	6837	626	15639	0.372204	0.999672	1
GO:0005784	Sec61 translocon complex	cellular_component	cell	2	6837	4	15639	0.5	0.587903	1
GO:0005786	signal recognition particle, endoplasmic reticulum targeting	cellular_component	cell	1	6837	10	15639	0.1	0.996818	1
GO:0005787	signal peptidase complex	cellular_component	cell	1	6837	4	15639	0.25	0.899686	1
GO:0005788	endoplasmic reticulum lumen	cellular_component	cell	15	6837	36	15639	0.416667	0.659032	1
GO:0005789	endoplasmic reticulum membrane	cellular_component	cell	189	6837	510	15639	0.370588	0.999178	1
GO:0005793	endoplasmic reticulum-Golgi intermediate compartment	cellular_component	cell	3	6837	20	15639	0.15	0.998673	1
GO:0005794	Golgi apparatus	cellular_component	cell	246	6837	742	15639	0.331536	1	1
GO:0005795	Golgi stack	cellular_component	cell	3	6837	14	15639	0.214286	0.978672	1
GO:0005797	Golgi medial cisterna	cellular_component	cell	3	6837	7	15639	0.428571	0.658208	1
GO:0005798	Golgi-associated vesicle	cellular_component	cell	1	6837	4	15639	0.25	0.899686	1
GO:0005801	cis-Golgi network	cellular_component	cell	4	6837	19	15639	0.210526	0.989678	1
GO:0005802	trans-Golgi network	cellular_component	organelle	77	6837	263	15639	0.292776	1	1
GO:0005811	lipid droplet	cellular_component	cell	12	6837	26	15639	0.461538	0.475684	1
GO:0005816	spindle pole body	cellular_component	cell	2	6837	5	15639	0.4	0.724222	1
GO:0005829	cytosol	cellular_component	cell	626	6837	1564	15639	0.400256	0.999152	1
GO:0005834	heterotrimeric G-protein complex	cellular_component	cell	1	6837	7	15639	0.142857	0.982129	1
GO:0005839	proteasome core complex	cellular_component	cell	2	6837	12	15639	0.166667	0.989595	1
GO:0005844	polysome	cellular_component	protein-containing complex	1	6837	9	15639	0.111111	0.994343	1
GO:0005845	mRNA cap binding complex	cellular_component	cell part	1	6837	3	15639	0.333333	0.821741	1
GO:0005847	mRNA cleavage and polyadenylation specificity factor complex	cellular_component	cell	4	6837	8	15639	0.5	0.493014	1
GO:0005849	mRNA cleavage factor complex	cellular_component	cell	3	6837	7	15639	0.428571	0.658208	1
GO:0005851	eukaryotic translation initiation factor 2B complex	cellular_component	cell	2	6837	6	15639	0.333333	0.820125	1
GO:0005875	microtubule associated complex	cellular_component	cell	2	6837	8	15639	0.25	0.927414	1
GO:0005880	nuclear microtubule	cellular_component	cell	3	6837	7	15639	0.428571	0.658208	1
GO:0005901	caveola	cellular_component	cell	2	6837	4	15639	0.5	0.587903	1
GO:0005905	clathrin-coated pit	cellular_component	cell	10	6837	22	15639	0.454545	0.516493	1
GO:0005929	cilium	cellular_component	cell	2	6837	8	15639	0.25	0.927414	1
GO:0005935	cellular bud neck	cellular_component	cell	1	6837	3	15639	0.333333	0.821741	1
GO:0005938	cell cortex	cellular_component	cell part	12	6837	26	15639	0.461538	0.475684	1
GO:0008023	transcription elongation factor complex	cellular_component	cell	1	6837	4	15639	0.25	0.899686	1
GO:0008024	cyclin/CDK positive transcription elongation factor complex	cellular_component	cell	1	6837	3	15639	0.333333	0.821741	1
GO:0008180	COP9 signalosome	cellular_component	cell	3	6837	11	15639	0.272727	0.923369	1
GO:0008250	oligosaccharyltransferase complex	cellular_component	cell part	2	6837	7	15639	0.285714	0.884892	1
GO:0008278	cohesin complex	cellular_component	cell	2	6837	5	15639	0.4	0.724222	1
GO:0008352	katanin complex	cellular_component	cell	1	6837	3	15639	0.333333	0.821741	1
GO:0008540	proteasome regulatory particle, base subcomplex	cellular_component	cell	2	6837	15	15639	0.133333	0.99773	1
GO:0008541	proteasome regulatory particle, lid subcomplex	cellular_component	cell	1	6837	8	15639	0.125	0.989945	1
GO:0009328	phenylalanine-tRNA ligase complex	cellular_component	cell	1	6837	3	15639	0.333333	0.821741	1
GO:0009331	glycerol-3-phosphate dehydrogenase complex	cellular_component	cell	2	6837	5	15639	0.4	0.724222	1
GO:0009346	citrate lyase complex	cellular_component	cell	1	6837	3	15639	0.333333	0.821741	1
GO:0009349	riboflavin synthase complex	cellular_component	protein-containing complex	1	6837	2	15639	0.5	0.683245	1
GO:0009353	mitochondrial oxoglutarate dehydrogenase complex	cellular_component	cell	1	6837	2	15639	0.5	0.683245	1
GO:0009368	endopeptidase Clp complex	cellular_component	cell	1	6837	9	15639	0.111111	0.994343	1
GO:0009501	amyloplast	cellular_component	cell	6	6837	20	15639	0.3	0.930816	1
GO:0009513	etioplast	cellular_component	cell	1	6837	3	15639	0.333333	0.821741	1
GO:0009522	photosystem I	cellular_component	cell	13	6837	30	15639	0.433333	0.586533	1
GO:0009523	photosystem II	cellular_component	cell	17	6837	44	15639	0.386364	0.796762	1
GO:0009526	plastid envelope	cellular_component	cell	2	6837	5	15639	0.4	0.724222	1
GO:0009527	plastid outer membrane	cellular_component	cell	2	6837	4	15639	0.5	0.587903	1
GO:0009528	plastid inner membrane	cellular_component	cell	1	6837	3	15639	0.333333	0.821741	1
GO:0009530	primary cell wall	cellular_component	cell	8	6837	24	15639	0.333333	0.892351	1
GO:0009531	secondary cell wall	cellular_component	cell part	2	6837	4	15639	0.5	0.587903	1
GO:0009532	plastid stroma	cellular_component	cell	1	6837	13	15639	0.0769231	0.999434	1
GO:0009533	chloroplast stromal thylakoid	cellular_component	cell	1	6837	5	15639	0.2	0.943552	1
GO:0009536	plastid	cellular_component	cell part	93	6837	245	15639	0.379592	0.971611	1
GO:0009538	photosystem I reaction center	cellular_component	cell	3	6837	10	15639	0.3	0.885515	1
GO:0009543	chloroplast thylakoid lumen	cellular_component	cell	19	6837	52	15639	0.365385	0.882707	1
GO:0009569	chloroplast starch grain	cellular_component	cell	1	6837	7	15639	0.142857	0.982129	1
GO:0009654	photosystem II oxygen evolving complex	cellular_component	cell	8	6837	21	15639	0.380952	0.768522	1
GO:0009705	plant-type vacuole membrane	cellular_component	cell	33	6837	101	15639	0.326733	0.991205	1
GO:0009706	chloroplast inner membrane	cellular_component	cell part	28	6837	73	15639	0.383562	0.851864	1
GO:0009840	chloroplastic endopeptidase Clp complex	cellular_component	cell	1	6837	6	15639	0.166667	0.968238	1
GO:0009897	external side of plasma membrane	cellular_component	cell	7	6837	16	15639	0.4375	0.594048	1
GO:0009898	cytoplasmic side of plasma membrane	cellular_component	cell	5	6837	11	15639	0.454545	0.568866	1
GO:0009941	chloroplast envelope	cellular_component	cell	138	6837	325	15639	0.424615	0.697098	1
GO:0010008	endosome membrane	cellular_component	cell	28	6837	91	15639	0.307692	0.995912	1
GO:0010168	ER body	cellular_component	cell	1	6837	3	15639	0.333333	0.821741	1
GO:0010282	senescence-associated vacuole	cellular_component	cell	2	6837	7	15639	0.285714	0.884892	1
GO:0010445	nuclear dicing body	cellular_component	cell part	1	6837	6	15639	0.166667	0.968238	1
GO:0010494	cytoplasmic stress granule	cellular_component	cell	3	6837	19	15639	0.157895	0.997861	1
GO:0012507	ER to Golgi transport vesicle membrane	cellular_component	cell	1	6837	15	15639	0.0666667	0.999821	1
GO:0012510	trans-Golgi network transport vesicle membrane	cellular_component	cell	2	6837	4	15639	0.5	0.587903	1
GO:0016021	integral component of membrane	cellular_component	membrane	1829	6837	4239	15639	0.43147	0.814703	1
GO:0016272	prefoldin complex	cellular_component	protein-containing complex	3	6837	6	15639	0.5	0.532417	1
GO:0016281	eukaryotic translation initiation factor 4F complex	cellular_component	cell	1	6837	5	15639	0.2	0.943552	1
GO:0016328	lateral plasma membrane	cellular_component	cell	1	6837	2	15639	0.5	0.683245	1
GO:0016363	nuclear matrix	cellular_component	cell	2	6837	9	15639	0.222222	0.954761	1
GO:0016471	vacuolar proton-transporting V-type ATPase complex	cellular_component	cell	2	6837	8	15639	0.25	0.927414	1
GO:0016589	NURF complex	cellular_component	cell	1	6837	2	15639	0.5	0.683245	1
GO:0016592	mediator complex	cellular_component	cell	6	6837	55	15639	0.109091	1	1
GO:0016593	Cdc73/Paf1 complex	cellular_component	cell	4	6837	10	15639	0.4	0.706132	1
GO:0016602	CCAAT-binding factor complex	cellular_component	cell part	1	6837	14	15639	0.0714286	0.999681	1
GO:0016607	nuclear speck	cellular_component	cell	33	6837	88	15639	0.375	0.901603	1
GO:0017119	Golgi transport complex	cellular_component	cell	4	6837	11	15639	0.363636	0.784569	1
GO:0018444	translation release factor complex	cellular_component	cell	2	6837	6	15639	0.333333	0.820125	1
GO:0019005	SCF ubiquitin ligase complex	cellular_component	cell	15	6837	56	15639	0.267857	0.997107	1
GO:0019008	molybdopterin synthase complex	cellular_component	cell	1	6837	3	15639	0.333333	0.821741	1
GO:0019773	proteasome core complex, alpha-subunit complex	cellular_component	cell	3	6837	10	15639	0.3	0.885515	1
GO:0019774	proteasome core complex, beta-subunit complex	cellular_component	cell	1	6837	7	15639	0.142857	0.982129	1
GO:0019897	extrinsic component of plasma membrane	cellular_component	cell	1	6837	6	15639	0.166667	0.968238	1
GO:0019898	extrinsic component of membrane	cellular_component	membrane	10	6837	32	15639	0.3125	0.947481	1
GO:0030014	CCR4-NOT complex	cellular_component	cell	3	6837	16	15639	0.1875	0.991325	1
GO:0030015	CCR4-NOT core complex	cellular_component	cell	5	6837	29	15639	0.172414	0.999393	1
GO:0030125	clathrin vesicle coat	cellular_component	cell	2	6837	7	15639	0.285714	0.884892	1
GO:0030126	COPI vesicle coat	cellular_component	cell	3	6837	17	15639	0.176471	0.994527	1
GO:0030127	COPII vesicle coat	cellular_component	cell	2	6837	16	15639	0.125	0.998645	1
GO:0030130	clathrin coat of trans-Golgi network vesicle	cellular_component	cell	3	6837	7	15639	0.428571	0.658208	1
GO:0030132	clathrin coat of coated pit	cellular_component	cell	3	6837	7	15639	0.428571	0.658208	1
GO:0030134	COPII-coated ER to Golgi transport vesicle	cellular_component	cell	4	6837	15	15639	0.266667	0.947981	1
GO:0030139	endocytic vesicle	cellular_component	cell	2	6837	4	15639	0.5	0.587903	1
GO:0030140	trans-Golgi network transport vesicle	cellular_component	cell	1	6837	4	15639	0.25	0.899686	1
GO:0030173	integral component of Golgi membrane	cellular_component	cell	5	6837	29	15639	0.172414	0.999393	1
GO:0030176	integral component of endoplasmic reticulum membrane	cellular_component	cell	11	6837	46	15639	0.23913	0.998424	1
GO:0030428	cell septum	cellular_component	cell	1	6837	3	15639	0.333333	0.821741	1
GO:0030658	transport vesicle membrane	cellular_component	cell	1	6837	6	15639	0.166667	0.968238	1
GO:0030659	cytoplasmic vesicle membrane	cellular_component	cell	8	6837	22	15639	0.363636	0.818195	1
GO:0030665	clathrin-coated vesicle membrane	cellular_component	cell	3	6837	9	15639	0.333333	0.8317	1
GO:0030688	preribosome, small subunit precursor	cellular_component	protein-containing complex	2	6837	5	15639	0.4	0.724222	1
GO:0030864	cortical actin cytoskeleton	cellular_component	cell part	1	6837	3	15639	0.333333	0.821741	1
GO:0030870	Mre11 complex	cellular_component	cell	1	6837	3	15639	0.333333	0.821741	1
GO:0030875	rDNA protrusion	cellular_component	cell part	1	6837	2	15639	0.5	0.683245	1
GO:0030915	Smc5-Smc6 complex	cellular_component	cell	4	6837	8	15639	0.5	0.493014	1
GO:0031011	Ino80 complex	cellular_component	cell	4	6837	12	15639	0.333333	0.845265	1
GO:0031012	extracellular matrix	cellular_component	extracellular region	2	6837	8	15639	0.25	0.927414	1
GO:0031090	organelle membrane	cellular_component	membrane	14	6837	36	15639	0.388889	0.773073	1
GO:0031201	SNARE complex	cellular_component	cell	15	6837	51	15639	0.294118	0.98757	1
GO:0031205	endoplasmic reticulum Sec complex	cellular_component	cell	2	6837	4	15639	0.5	0.587903	1
GO:0031262	Ndc80 complex	cellular_component	cell	1	6837	3	15639	0.333333	0.821741	1
GO:0031298	replication fork protection complex	cellular_component	cell	1	6837	3	15639	0.333333	0.821741	1
GO:0031305	integral component of mitochondrial inner membrane	cellular_component	cell	8	6837	23	15639	0.347826	0.859191	1
GO:0031307	integral component of mitochondrial outer membrane	cellular_component	membrane	4	6837	16	15639	0.25	0.964761	1
GO:0031314	extrinsic component of mitochondrial inner membrane	cellular_component	cell	2	6837	7	15639	0.285714	0.884892	1
GO:0031357	integral component of chloroplast inner membrane	cellular_component	cell	1	6837	3	15639	0.333333	0.821741	1
GO:0031359	integral component of chloroplast outer membrane	cellular_component	cell	2	6837	11	15639	0.181818	0.982896	1
GO:0031410	cytoplasmic vesicle	cellular_component	cell	10	6837	26	15639	0.384615	0.768373	1
GO:0031461	cullin-RING ubiquitin ligase complex	cellular_component	cell	5	6837	14	15639	0.357143	0.807519	1
GO:0031462	Cul2-RING ubiquitin ligase complex	cellular_component	cell	1	6837	2	15639	0.5	0.683245	1
GO:0031463	Cul3-RING ubiquitin ligase complex	cellular_component	cell	1	6837	3	15639	0.333333	0.821741	1
GO:0031467	Cul7-RING ubiquitin ligase complex	cellular_component	cell	1	6837	2	15639	0.5	0.683245	1
GO:0031514	motile cilium	cellular_component	cell	5	6837	11	15639	0.454545	0.568866	1
GO:0031515	tRNA (m1A) methyltransferase complex	cellular_component	cell part	1	6837	2	15639	0.5	0.683245	1
GO:0031519	PcG protein complex	cellular_component	cell	2	6837	5	15639	0.4	0.724222	1
GO:0031597	cytosolic proteasome complex	cellular_component	cell	1	6837	6	15639	0.166667	0.968238	1
GO:0031901	early endosome membrane	cellular_component	cell	3	6837	17	15639	0.176471	0.994527	1
GO:0031902	late endosome membrane	cellular_component	cell	9	6837	52	15639	0.173077	0.999987	1
GO:0031965	nuclear membrane	cellular_component	cell	16	6837	39	15639	0.410256	0.689689	1
GO:0031966	mitochondrial membrane	cellular_component	cell part	3	6837	33	15639	0.0909091	0.999998	1
GO:0031969	chloroplast membrane	cellular_component	cell part	49	6837	116	15639	0.422414	0.659902	1
GO:0031972	chloroplast intermembrane space	cellular_component	cell	1	6837	3	15639	0.333333	0.821741	1
GO:0031977	thylakoid lumen	cellular_component	cell	12	6837	31	15639	0.387097	0.770178	1
GO:0032153	cell division site	cellular_component	cell	6	6837	15	15639	0.4	0.705535	1
GO:0032578	aleurone grain membrane	cellular_component	cell	1	6837	2	15639	0.5	0.683245	1
GO:0032580	Golgi cisterna membrane	cellular_component	cell	11	6837	32	15639	0.34375	0.894524	1
GO:0032585	multivesicular body membrane	cellular_component	cell	3	6837	10	15639	0.3	0.885515	1
GO:0032588	trans-Golgi network membrane	cellular_component	cell	2	6837	11	15639	0.181818	0.982896	1
GO:0032991	protein-containing complex	cellular_component	protein-containing complex	9	6837	24	15639	0.375	0.79287	1
GO:0033063	Rad51B-Rad51C-Rad51D-XRCC2 complex	cellular_component	cell	2	6837	4	15639	0.5	0.587903	1
GO:0033100	NuA3 histone acetyltransferase complex	cellular_component	cell	1	6837	2	15639	0.5	0.683245	1
GO:0033116	endoplasmic reticulum-Golgi intermediate compartment membrane	cellular_component	cell	1	6837	6	15639	0.166667	0.968238	1
GO:0033178	proton-transporting two-sector ATPase complex, catalytic domain	cellular_component	membrane	1	6837	4	15639	0.25	0.899686	1
GO:0033180	proton-transporting V-type ATPase, V1 domain	cellular_component	membrane	1	6837	5	15639	0.2	0.943552	1
GO:0033203	DNA helicase A complex	cellular_component	cell part	1	6837	2	15639	0.5	0.683245	1
GO:0033281	TAT protein transport complex	cellular_component	protein-containing complex	1	6837	2	15639	0.5	0.683245	1
GO:0034045	phagophore assembly site membrane	cellular_component	cell	4	6837	11	15639	0.363636	0.784569	1
GO:0034098	VCP-NPL4-UFD1 AAA ATPase complex	cellular_component	cell	2	6837	6	15639	0.333333	0.820125	1
GO:0034457	Mpp10 complex	cellular_component	cell	2	6837	4	15639	0.5	0.587903	1
GO:0034515	proteasome storage granule	cellular_component	cell	2	6837	4	15639	0.5	0.587903	1
GO:0034663	endoplasmic reticulum chaperone complex	cellular_component	cell	1	6837	4	15639	0.25	0.899686	1
GO:0034707	chloride channel complex	cellular_component	membrane	2	6837	9	15639	0.222222	0.954761	1
GO:0035097	histone methyltransferase complex	cellular_component	cell	1	6837	9	15639	0.111111	0.994343	1
GO:0035102	PRC1 complex	cellular_component	cell	1	6837	3	15639	0.333333	0.821741	1
GO:0035145	exon-exon junction complex	cellular_component	cell	1	6837	4	15639	0.25	0.899686	1
GO:0035267	NuA4 histone acetyltransferase complex	cellular_component	cell	2	6837	8	15639	0.25	0.927414	1
GO:0035861	site of double-strand break	cellular_component	cell	5	6837	11	15639	0.454545	0.568866	1
GO:0036513	Derlin-1 retrotranslocation complex	cellular_component	cell	1	6837	8	15639	0.125	0.989945	1
GO:0042644	chloroplast nucleoid	cellular_component	cell	10	6837	23	15639	0.434783	0.588678	1
GO:0042645	mitochondrial nucleoid	cellular_component	cell	3	6837	7	15639	0.428571	0.658208	1
GO:0042646	plastid nucleoid	cellular_component	cell part	1	6837	4	15639	0.25	0.899686	1
GO:0042651	thylakoid membrane	cellular_component	cell part	8	6837	18	15639	0.444444	0.56544	1
GO:0042765	GPI-anchor transamidase complex	cellular_component	cell	1	6837	5	15639	0.2	0.943552	1
GO:0043186	P granule	cellular_component	cell	2	6837	4	15639	0.5	0.587903	1
GO:0043224	nuclear SCF ubiquitin ligase complex	cellular_component	cell	1	6837	2	15639	0.5	0.683245	1
GO:0043226	organelle	cellular_component	organelle	2	6837	4	15639	0.5	0.587903	1
GO:0043240	Fanconi anaemia nuclear complex	cellular_component	cell	1	6837	3	15639	0.333333	0.821741	1
GO:0043601	nuclear replisome	cellular_component	cell	1	6837	2	15639	0.5	0.683245	1
GO:0043625	delta DNA polymerase complex	cellular_component	cell	1	6837	2	15639	0.5	0.683245	1
GO:0043657	host cell	cellular_component	other organism	1	6837	4	15639	0.25	0.899686	1
GO:0044614	nuclear pore cytoplasmic filaments	cellular_component	cell	2	6837	5	15639	0.4	0.724222	1
GO:0044615	nuclear pore nuclear basket	cellular_component	cell	1	6837	3	15639	0.333333	0.821741	1
GO:0044732	mitotic spindle pole body	cellular_component	organelle part	7	6837	18	15639	0.388889	0.739881	1
GO:0045252	oxoglutarate dehydrogenase complex	cellular_component	cell	1	6837	4	15639	0.25	0.899686	1
GO:0045261	proton-transporting ATP synthase complex, catalytic core F(1)	cellular_component	membrane part	4	6837	9	15639	0.444444	0.608573	1
GO:0045263	proton-transporting ATP synthase complex, coupling factor F(o)	cellular_component	cell	2	6837	6	15639	0.333333	0.820125	1
GO:0045334	clathrin-coated endocytic vesicle	cellular_component	cell	1	6837	2	15639	0.5	0.683245	1
GO:0045335	phagocytic vesicle	cellular_component	cell part	4	6837	8	15639	0.5	0.493014	1
GO:0046540	U4/U6 x U5 tri-snRNP complex	cellular_component	cell	14	6837	31	15639	0.451613	0.504506	1
GO:0046861	glyoxysomal membrane	cellular_component	cell part	1	6837	6	15639	0.166667	0.968238	1
GO:0046930	pore complex	cellular_component	membrane	6	6837	15	15639	0.4	0.705535	1
GO:0048188	Set1C/COMPASS complex	cellular_component	cell	2	6837	7	15639	0.285714	0.884892	1
GO:0048226	Casparian strip	cellular_component	cell	3	6837	10	15639	0.3	0.885515	1
GO:0048471	perinuclear region of cytoplasm	cellular_component	cell	10	6837	24	15639	0.416667	0.655423	1
GO:0048476	Holliday junction resolvase complex	cellular_component	cell	1	6837	2	15639	0.5	0.683245	1
GO:0048555	generative cell nucleus	cellular_component	cell part	2	6837	5	15639	0.4	0.724222	1
GO:0051286	cell tip	cellular_component	cell part	1	6837	4	15639	0.25	0.899686	1
GO:0055035	plastid thylakoid membrane	cellular_component	cell	2	6837	4	15639	0.5	0.587903	1
GO:0055037	recycling endosome	cellular_component	cell	1	6837	6	15639	0.166667	0.968238	1
GO:0055038	recycling endosome membrane	cellular_component	cell	1	6837	4	15639	0.25	0.899686	1
GO:0070062	extracellular exosome	cellular_component	extracellular region	1	6837	12	15639	0.0833333	0.998993	1
GO:0070390	transcription export complex 2	cellular_component	cell	1	6837	4	15639	0.25	0.899686	1
GO:0070469	respiratory chain	cellular_component	membrane part	5	6837	27	15639	0.185185	0.998556	1
GO:0070603	SWI/SNF superfamily-type complex	cellular_component	cell	1	6837	2	15639	0.5	0.683245	1
GO:0070652	HAUS complex	cellular_component	cell part	1	6837	7	15639	0.142857	0.982129	1
GO:0070765	gamma-secretase complex	cellular_component	cell	1	6837	2	15639	0.5	0.683245	1
GO:0070847	core mediator complex	cellular_component	cell part	1	6837	8	15639	0.125	0.989945	1
GO:0070985	transcription factor TFIIK complex	cellular_component	cell	1	6837	4	15639	0.25	0.899686	1
GO:0071004	U2-type prespliceosome	cellular_component	cell	8	6837	22	15639	0.363636	0.818195	1
GO:0071006	U2-type catalytic step 1 spliceosome	cellular_component	cell	3	6837	7	15639	0.428571	0.658208	1
GO:0071007	U2-type catalytic step 2 spliceosome	cellular_component	cell	2	6837	5	15639	0.4	0.724222	1
GO:0071008	U2-type post-mRNA release spliceosomal complex	cellular_component	cell	1	6837	2	15639	0.5	0.683245	1
GO:0071013	catalytic step 2 spliceosome	cellular_component	cell	14	6837	41	15639	0.341463	0.919841	1
GO:0071014	post-mRNA release spliceosomal complex	cellular_component	cell	6	6837	22	15639	0.272727	0.964687	1
GO:0071339	MLL1 complex	cellular_component	cell	1	6837	2	15639	0.5	0.683245	1
GO:0071439	clathrin complex	cellular_component	cell	1	6837	3	15639	0.333333	0.821741	1
GO:0071540	eukaryotic translation initiation factor 3 complex, eIF3e	cellular_component	cell	1	6837	2	15639	0.5	0.683245	1
GO:0071821	FANCM-MHF complex	cellular_component	cell	1	6837	2	15639	0.5	0.683245	1
GO:0072380	TRC complex	cellular_component	cell	1	6837	2	15639	0.5	0.683245	1
GO:0072546	ER membrane protein complex	cellular_component	membrane part	1	6837	8	15639	0.125	0.989945	1
GO:0090575	RNA polymerase II transcription factor complex	cellular_component	cell	5	6837	16	15639	0.3125	0.89764	1
GO:0097550	transcriptional preinitiation complex	cellular_component	protein-containing complex	1	6837	5	15639	0.2	0.943552	1
GO:0097708	intracellular vesicle	cellular_component	cell part	1	6837	2	15639	0.5	0.683245	1
GO:0098807	chloroplast thylakoid membrane protein complex	cellular_component	cell	1	6837	3	15639	0.333333	0.821741	1
GO:0101031	chaperone complex	cellular_component	protein-containing complex	1	6837	4	15639	0.25	0.899686	1
GO:1990726	Lsm1-7-Pat1 complex	cellular_component	protein-containing complex	4	6837	9	15639	0.444444	0.608573	1

## Sheet: Table S2C
Table S2C GO_molecular functions enrichment information sheet
GO_F Term ID	GO_F Term Desc	GO_F Term Level1	GO_F Term Level2	Term Candidate Gene Num	Total Candidate Gene Num	Term Gene Num	Total Gene Num	Rich Ratio	P value	Q value
GO:0003735	structural constituent of ribosome	molecular_function	structural molecule activity	242	6861	326	15989	0.742331	4.58238e-31	7.75339e-28
GO:0003777	microtubule motor activity	molecular_function	catalytic activity	44	6861	62	15989	0.709677	7.09554e-06	0.00400188
GO:0008017	microtubule binding	molecular_function	binding	79	6861	126	15989	0.626984	5.6441e-06	0.00400188
GO:0015293	symporter activity	molecular_function	transporter activity	32	6861	42	15989	0.761905	1.1823e-05	0.00500113
GO:0016491	oxidoreductase activity	molecular_function	catalytic activity	205	6861	385	15989	0.532468	2.32747e-05	0.00787617
GO:0031492	nucleosomal DNA binding	molecular_function	binding	17	6861	20	15989	0.85	0.000135419	0.0381881
GO:0003688	DNA replication origin binding	molecular_function	binding	10	6861	10	15989	1	0.000210879	0.0409908
GO:0004867	serine-type endopeptidase inhibitor activity	molecular_function	molecular function regulator	24	6861	32	15989	0.75	0.000231068	0.0409908
GO:0015171	amino acid transmembrane transporter activity	molecular_function	transporter activity	35	6861	51	15989	0.686275	0.000181653	0.0409908
GO:0050404	zeatin O-beta-D-xylosyltransferase activity	molecular_function	catalytic activity	21	6861	27	15989	0.777778	0.000242262	0.0409908
GO:0030570	pectate lyase activity	molecular_function	catalytic activity	19	6861	24	15989	0.791667	0.000324711	0.0457843
GO:0050403	trans-zeatin O-beta-D-glucosyltransferase activity	molecular_function	catalytic activity	19	6861	24	15989	0.791667	0.000324711	0.0457843
GO:0051119	sugar transmembrane transporter activity	molecular_function	transporter activity	22	6861	30	15989	0.733333	0.000717597	0.093398
GO:0019901	protein kinase binding	molecular_function	binding	42	6861	67	15989	0.626866	0.000853853	0.103194
GO:0016709	oxidoreductase activity, acting on paired donors, with incorporation or reduction of molecular oxygen, NAD(P)H as one donor, and incorporation of one atom of oxygen	molecular_function	catalytic activity	47	6861	77	15989	0.61039	0.0010054	0.113409
GO:0004031	aldehyde oxidase activity	molecular_function	catalytic activity	12	6861	14	15989	0.857143	0.00129134	0.114997
GO:0010997	anaphase-promoting complex binding	molecular_function	binding	8	6861	8	15989	1	0.00114688	0.114997
GO:0102797	geranial:oxygen oxidoreductase activity	molecular_function	catalytic activity	12	6861	14	15989	0.857143	0.00129134	0.114997
GO:0102798	heptaldehyde:oxygen oxidoreductase activity	molecular_function	catalytic activity	12	6861	14	15989	0.857143	0.00129134	0.114997
GO:0005524	ATP binding	molecular_function	binding	1110	6861	2436	15989	0.455665	0.00218909	0.173835
GO:0016788	hydrolase activity, acting on ester bonds	molecular_function	catalytic activity	48	6861	81	15989	0.592593	0.00217856	0.173835
GO:0019843	rRNA binding	molecular_function	binding	54	6861	93	15989	0.580645	0.00226026	0.173835
GO:0097027	ubiquitin-protein transferase activator activity	molecular_function	molecular function regulator	7	6861	7	15989	1	0.00267426	0.196733
GO:0048038	quinone binding	molecular_function	binding	14	6861	18	15989	0.777778	0.0028587	0.201539
GO:0043021	ribonucleoprotein complex binding	molecular_function	binding	9	6861	10	15989	0.9	0.00302014	0.204403
GO:0004672	protein kinase activity	molecular_function	catalytic activity	158	6861	312	15989	0.50641	0.00330306	0.214953
GO:0080043	quercetin 3-O-glucosyltransferase activity	molecular_function	catalytic activity	34	6861	55	15989	0.618182	0.00360573	0.217889
GO:0080044	quercetin 7-O-glucosyltransferase activity	molecular_function	catalytic activity	34	6861	55	15989	0.618182	0.00360573	0.217889
GO:0004806	triglyceride lipase activity	molecular_function	catalytic activity	12	6861	15	15989	0.8	0.00392214	0.228836
GO:0004553	hydrolase activity, hydrolyzing O-glycosyl compounds	molecular_function	catalytic activity	50	6861	87	15989	0.574713	0.00429879	0.242452
GO:0042973	glucan endo-1,3-beta-D-glucosidase activity	molecular_function	catalytic activity	34	6861	56	15989	0.607143	0.00542955	0.296348
GO:0016165	linoleate 13S-lipoxygenase activity	molecular_function	catalytic activity	6	6861	6	15989	1	0.00623526	0.310296
GO:0016614	oxidoreductase activity, acting on CH-OH group of donors	molecular_function	catalytic activity	6	6861	6	15989	1	0.00623526	0.310296
GO:0046593	mandelonitrile lyase activity	molecular_function	catalytic activity	6	6861	6	15989	1	0.00623526	0.310296
GO:0015299	solute:proton antiporter activity	molecular_function	transporter activity	20	6861	30	15989	0.666667	0.00740005	0.357739
GO:0017056	structural constituent of nuclear pore	molecular_function	structural molecule activity	15	6861	21	15989	0.714286	0.00781023	0.367081
GO:0030599	pectinesterase activity	molecular_function	catalytic activity	40	6861	69	15989	0.57971	0.00824883	0.36729
GO:0045330	aspartyl esterase activity	molecular_function	catalytic activity	39	6861	67	15989	0.58209	0.00823763	0.36729
GO:0010329	auxin efflux transmembrane transporter activity	molecular_function	transporter activity	16	6861	23	15989	0.695652	0.00895443	0.380251
GO:0016538	cyclin-dependent protein serine/threonine kinase regulator activity	molecular_function	molecular function regulator	23	6861	36	15989	0.638889	0.00898938	0.380251
GO:0001872	(1->3)-beta-D-glucan binding	molecular_function	binding	7	6861	8	15989	0.875	0.0133659	0.396714
GO:0003677	DNA binding	molecular_function	binding	621	6861	1355	15989	0.458303	0.0126473	0.396714
GO:0003896	DNA primase activity	molecular_function	catalytic activity	5	6861	5	15989	1	0.0145368	0.396714
GO:0004566	beta-glucuronidase activity	molecular_function	catalytic activity	5	6861	5	15989	1	0.0145368	0.396714
GO:0005345	purine nucleobase transmembrane transporter activity	molecular_function	transporter activity	14	6861	20	15989	0.7	0.0132947	0.396714
GO:0008534	oxidized purine nucleobase lesion DNA N-glycosylase activity	molecular_function	catalytic activity	5	6861	5	15989	1	0.0145368	0.396714
GO:0008728	GTP diphosphokinase activity	molecular_function	catalytic activity	5	6861	5	15989	1	0.0145368	0.396714
GO:0015145	monosaccharide transmembrane transporter activity	molecular_function	transporter activity	5	6861	5	15989	1	0.0145368	0.396714
GO:0016207	4-coumarate-CoA ligase activity	molecular_function	catalytic activity	5	6861	5	15989	1	0.0145368	0.396714
GO:0016655	oxidoreductase activity, acting on NAD(P)H, quinone or similar compound as acceptor	molecular_function	catalytic activity	5	6861	5	15989	1	0.0145368	0.396714
GO:0030414	peptidase inhibitor activity	molecular_function	molecular function regulator	5	6861	5	15989	1	0.0145368	0.396714
GO:0032357	oxidized purine DNA binding	molecular_function	binding	5	6861	5	15989	1	0.0145368	0.396714
GO:0034485	phosphatidylinositol-3,4,5-trisphosphate 5-phosphatase activity	molecular_function	catalytic activity	9	6861	11	15989	0.818182	0.0102409	0.396714
GO:0043015	gamma-tubulin binding	molecular_function	binding	5	6861	5	15989	1	0.0145368	0.396714
GO:0047714	galactolipase activity	molecular_function	catalytic activity	9	6861	11	15989	0.818182	0.0102409	0.396714
GO:0050113	inositol oxygenase activity	molecular_function	catalytic activity	5	6861	5	15989	1	0.0145368	0.396714
GO:0050366	tyramine N-feruloyltransferase activity	molecular_function	catalytic activity	5	6861	5	15989	1	0.0145368	0.396714
GO:0070182	DNA polymerase binding	molecular_function	binding	5	6861	5	15989	1	0.0145368	0.396714
GO:0102336	3-oxo-arachidoyl-CoA synthase activity	molecular_function	catalytic activity	14	6861	20	15989	0.7	0.0132947	0.396714
GO:0102337	3-oxo-cerotoyl-CoA synthase activity	molecular_function	catalytic activity	14	6861	20	15989	0.7	0.0132947	0.396714
GO:0102338	3-oxo-lignoceronyl-CoA synthase activity	molecular_function	catalytic activity	14	6861	20	15989	0.7	0.0132947	0.396714
GO:0102756	very-long-chain 3-ketoacyl-CoA synthase activity	molecular_function	catalytic activity	14	6861	20	15989	0.7	0.0132947	0.396714
GO:0005315	inorganic phosphate transmembrane transporter activity	molecular_function	transporter activity	15	6861	22	15989	0.681818	0.0148653	0.399241
GO:0016798	hydrolase activity, acting on glycosyl bonds	molecular_function	catalytic activity	31	6861	53	15989	0.584906	0.0159748	0.419852
GO:0030246	carbohydrate binding	molecular_function	binding	105	6861	208	15989	0.504808	0.0161291	0.419852
GO:0004564	beta-fructofuranosidase activity	molecular_function	catalytic activity	8	6861	10	15989	0.8	0.0198566	0.43638
GO:0004675	transmembrane receptor protein serine/threonine kinase activity	molecular_function	catalytic activity	79	6861	153	15989	0.51634	0.0178917	0.43638
GO:0005351	carbohydrate:proton symporter activity	molecular_function	transporter activity	17	6861	26	15989	0.653846	0.017434	0.43638
GO:0009922	fatty acid elongase activity	molecular_function	catalytic activity	8	6861	10	15989	0.8	0.0198566	0.43638
GO:0015035	protein disulfide oxidoreductase activity	molecular_function	catalytic activity	48	6861	88	15989	0.545455	0.0181804	0.43638
GO:0016616	oxidoreductase activity, acting on the CH-OH group of donors, NAD or NADP as acceptor	molecular_function	catalytic activity	19	6861	30	15989	0.633333	0.0193299	0.43638
GO:0016799	hydrolase activity, hydrolyzing N-glycosyl compounds	molecular_function	catalytic activity	8	6861	10	15989	0.8	0.0198566	0.43638
GO:0016831	carboxy-lyase activity	molecular_function	catalytic activity	12	6861	17	15989	0.705882	0.0198589	0.43638
GO:0047134	protein-disulfide reductase activity	molecular_function	catalytic activity	8	6861	10	15989	0.8	0.0198566	0.43638
GO:0047215	indole-3-acetate beta-glucosyltransferase activity	molecular_function	catalytic activity	8	6861	10	15989	0.8	0.0198566	0.43638
GO:0080019	fatty-acyl-CoA reductase (alcohol-forming) activity	molecular_function	catalytic activity	8	6861	10	15989	0.8	0.0198566	0.43638
GO:0102965	alcohol-forming fatty acyl-CoA reductase activity	molecular_function	catalytic activity	8	6861	10	15989	0.8	0.0198566	0.43638
GO:0003899	DNA-directed 5'-3' RNA polymerase activity	molecular_function	catalytic activity	22	6861	36	15989	0.611111	0.0211717	0.459264
GO:0003746	translation elongation factor activity	molecular_function	binding	23	6861	38	15989	0.605263	0.021572	0.462024
GO:0004620	phospholipase activity	molecular_function	catalytic activity	14	6861	21	15989	0.666667	0.0242636	0.513174
GO:0008574	ATP-dependent microtubule motor activity, plus-end-directed	molecular_function	catalytic activity	9	6861	12	15989	0.75	0.025363	0.517039
GO:0017022	myosin binding	molecular_function	binding	9	6861	12	15989	0.75	0.025363	0.517039
GO:0030976	thiamine pyrophosphate binding	molecular_function	binding	9	6861	12	15989	0.75	0.025363	0.517039
GO:0008469	histone-arginine N-methyltransferase activity	molecular_function	catalytic activity	6	6861	7	15989	0.857143	0.0276013	0.530697
GO:0032549	ribonucleoside binding	molecular_function	binding	6	6861	7	15989	0.857143	0.0276013	0.530697
GO:0047196	long-chain-alcohol O-fatty-acyltransferase activity	molecular_function	catalytic activity	6	6861	7	15989	0.857143	0.0276013	0.530697
GO:0102966	arachidoyl-CoA:1-dodecanol O-acyltransferase activity	molecular_function	catalytic activity	6	6861	7	15989	0.857143	0.0276013	0.530697
GO:0103095	wax ester synthase activity	molecular_function	catalytic activity	6	6861	7	15989	0.857143	0.0276013	0.530697
GO:0008194	UDP-glycosyltransferase activity	molecular_function	catalytic activity	37	6861	67	15989	0.552239	0.0282032	0.536178
GO:0002020	protease binding	molecular_function	binding	4	6861	4	15989	1	0.0338881	0.546083
GO:0003824	catalytic activity	molecular_function	catalytic activity	70	6861	137	15989	0.510949	0.0321537	0.546083
GO:0003883	CTP synthase activity	molecular_function	catalytic activity	4	6861	4	15989	1	0.0338881	0.546083
GO:0004185	serine-type carboxypeptidase activity	molecular_function	catalytic activity	27	6861	47	15989	0.574468	0.0314521	0.546083
GO:0004737	pyruvate decarboxylase activity	molecular_function	catalytic activity	4	6861	4	15989	1	0.0338881	0.546083
GO:0004748	ribonucleoside-diphosphate reductase activity, thioredoxin disulfide as acceptor	molecular_function	catalytic activity	4	6861	4	15989	1	0.0338881	0.546083
GO:0005506	iron ion binding	molecular_function	binding	170	6861	355	15989	0.478873	0.031679	0.546083
GO:0009882	blue light photoreceptor activity	molecular_function	molecular transducer activity	4	6861	4	15989	1	0.0338881	0.546083
GO:0015301	anion:anion antiporter activity	molecular_function	transporter activity	11	6861	16	15989	0.6875	0.0335783	0.546083
GO:0046524	sucrose-phosphate synthase activity	molecular_function	catalytic activity	4	6861	4	15989	1	0.0338881	0.546083
GO:0046577	long-chain-alcohol oxidase activity	molecular_function	catalytic activity	4	6861	4	15989	1	0.0338881	0.546083
GO:0046910	pectinesterase inhibitor activity	molecular_function	molecular function regulator	28	6861	49	15989	0.571429	0.031271	0.546083
GO:0050362	L-tryptophan:2-oxoglutarate aminotransferase activity	molecular_function	catalytic activity	4	6861	4	15989	1	0.0338881	0.546083
GO:0050664	oxidoreductase activity, acting on NAD(P)H, oxygen as acceptor	molecular_function	catalytic activity	4	6861	4	15989	1	0.0338881	0.546083
GO:0051082	unfolded protein binding	molecular_function	binding	61	6861	118	15989	0.516949	0.0332914	0.546083
GO:0102311	8-hydroxygeraniol dehydrogenase activity	molecular_function	catalytic activity	4	6861	4	15989	1	0.0338881	0.546083
GO:0035673	oligopeptide transmembrane transporter activity	molecular_function	transporter activity	39	6861	72	15989	0.541667	0.035396	0.565001
GO:0001653	peptide receptor activity	molecular_function	molecular transducer activity	7	6861	9	15989	0.777778	0.0377907	0.58129
GO:0052691	UDP-arabinopyranose mutase activity	molecular_function	catalytic activity	7	6861	9	15989	0.777778	0.0377907	0.58129
GO:0070181	small ribosomal subunit rRNA binding	molecular_function	binding	7	6861	9	15989	0.777778	0.0377907	0.58129
GO:0102911	(-)-secoisolariciresinol dehydrogenase activity	molecular_function	catalytic activity	7	6861	9	15989	0.777778	0.0377907	0.58129
GO:0038023	signaling receptor activity	molecular_function	molecular transducer activity	14	6861	22	15989	0.636364	0.0407105	0.62056
GO:0003697	single-stranded DNA binding	molecular_function	binding	29	6861	52	15989	0.557692	0.0419447	0.630946
GO:0004857	enzyme inhibitor activity	molecular_function	molecular function regulator	28	6861	50	15989	0.56	0.0425106	0.630946
GO:0043565	sequence-specific DNA binding	molecular_function	binding	335	6861	727	15989	0.460798	0.0421948	0.630946
GO:0004709	MAP kinase kinase kinase activity	molecular_function	catalytic activity	20	6861	34	15989	0.588235	0.0449721	0.655972
GO:0050662	coenzyme binding	molecular_function	binding	20	6861	34	15989	0.588235	0.0449721	0.655972
GO:0004674	protein serine/threonine kinase activity	molecular_function	catalytic activity	358	6861	780	15989	0.458974	0.0456797	0.660599
GO:0000064	L-ornithine transmembrane transporter activity	molecular_function	transporter activity	5	6861	6	15989	0.833333	0.0560446	0.729442
GO:0003854	3-beta-hydroxy-delta5-steroid dehydrogenase activity	molecular_function	catalytic activity	5	6861	6	15989	0.833333	0.0560446	0.729442
GO:0003989	acetyl-CoA carboxylase activity	molecular_function	catalytic activity	5	6861	6	15989	0.833333	0.0560446	0.729442
GO:0004714	transmembrane receptor protein tyrosine kinase activity	molecular_function	catalytic activity	10	6861	15	15989	0.666667	0.055569	0.729442
GO:0008515	sucrose transmembrane transporter activity	molecular_function	transporter activity	10	6861	15	15989	0.666667	0.055569	0.729442
GO:0010294	abscisic acid glucosyltransferase activity	molecular_function	catalytic activity	10	6861	15	15989	0.666667	0.055569	0.729442
GO:0015116	sulfate transmembrane transporter activity	molecular_function	transporter activity	9	6861	13	15989	0.692308	0.0512733	0.729442
GO:0015631	tubulin binding	molecular_function	binding	5	6861	6	15989	0.833333	0.0560446	0.729442
GO:0016628	oxidoreductase activity, acting on the CH-CH group of donors, NAD or NADP as acceptor	molecular_function	catalytic activity	5	6861	6	15989	0.833333	0.0560446	0.729442
GO:0016887	ATPase activity	molecular_function	catalytic activity	97	6861	199	15989	0.487437	0.0551606	0.729442
GO:0035242	protein-arginine omega-N asymmetric methyltransferase activity	molecular_function	catalytic activity	5	6861	6	15989	0.833333	0.0560446	0.729442
GO:0042132	fructose 1,6-bisphosphate 1-phosphatase activity	molecular_function	catalytic activity	5	6861	6	15989	0.833333	0.0560446	0.729442
GO:0102985	Delta12-fatty-acid desaturase activity	molecular_function	catalytic activity	5	6861	6	15989	0.833333	0.0560446	0.729442
GO:0000179	rRNA (adenine-N6,N6-)-dimethyltransferase activity	molecular_function	catalytic activity	3	6861	3	15989	1	0.0789932	0.756997
GO:0003700	DNA-binding transcription factor activity	molecular_function	transcription regulator activity	581	6861	1293	15989	0.449343	0.0664526	0.756997
GO:0003886	DNA (cytosine-5-)-methyltransferase activity	molecular_function	catalytic activity	6	6861	8	15989	0.75	0.0703072	0.756997
GO:0003955	NAD(P)H dehydrogenase (quinone) activity	molecular_function	catalytic activity	6	6861	8	15989	0.75	0.0703072	0.756997
GO:0004003	ATP-dependent DNA helicase activity	molecular_function	catalytic activity	13	6861	21	15989	0.619048	0.0626141	0.756997
GO:0004049	anthranilate synthase activity	molecular_function	catalytic activity	3	6861	3	15989	1	0.0789932	0.756997
GO:0004324	ferredoxin-NADP+ reductase activity	molecular_function	catalytic activity	3	6861	3	15989	1	0.0789932	0.756997
GO:0004348	glucosylceramidase activity	molecular_function	catalytic activity	3	6861	3	15989	1	0.0789932	0.756997
GO:0004514	nicotinate-nucleotide diphosphorylase (carboxylating) activity	molecular_function	catalytic activity	3	6861	3	15989	1	0.0789932	0.756997
GO:0004586	ornithine decarboxylase activity	molecular_function	catalytic activity	3	6861	3	15989	1	0.0789932	0.756997
GO:0004802	transketolase activity	molecular_function	catalytic activity	3	6861	3	15989	1	0.0789932	0.756997
GO:0005290	L-histidine transmembrane transporter activity	molecular_function	transporter activity	3	6861	3	15989	1	0.0789932	0.756997
GO:0008242	omega peptidase activity	molecular_function	catalytic activity	3	6861	3	15989	1	0.0789932	0.756997
GO:0008886	glyceraldehyde-3-phosphate dehydrogenase (NADP+) (non-phosphorylating) activity	molecular_function	catalytic activity	3	6861	3	15989	1	0.0789932	0.756997
GO:0008889	glycerophosphodiester phosphodiesterase activity	molecular_function	catalytic activity	6	6861	8	15989	0.75	0.0703072	0.756997
GO:0010436	carotenoid dioxygenase activity	molecular_function	catalytic activity	6	6861	8	15989	0.75	0.0703072	0.756997
GO:0015137	citrate transmembrane transporter activity	molecular_function	transporter activity	3	6861	3	15989	1	0.0789932	0.756997
GO:0015189	L-lysine transmembrane transporter activity	molecular_function	transporter activity	6	6861	8	15989	0.75	0.0703072	0.756997
GO:0015238	drug transmembrane transporter activity	molecular_function	transporter activity	35	6861	66	15989	0.530303	0.0624434	0.756997
GO:0015267	channel activity	molecular_function	transporter activity	19	6861	33	15989	0.575758	0.0640122	0.756997
GO:0015333	peptide:proton symporter activity	molecular_function	transporter activity	34	6861	64	15989	0.53125	0.0639344	0.756997
GO:0016157	sucrose synthase activity	molecular_function	catalytic activity	7	6861	10	15989	0.7	0.0796368	0.756997
GO:0016161	beta-amylase activity	molecular_function	catalytic activity	6	6861	8	15989	0.75	0.0703072	0.756997
GO:0016274	protein-arginine N-methyltransferase activity	molecular_function	catalytic activity	3	6861	3	15989	1	0.0789932	0.756997
GO:0016277	[myelin basic protein]-arginine N-methyltransferase activity	molecular_function	catalytic activity	3	6861	3	15989	1	0.0789932	0.756997
GO:0016615	malate dehydrogenase activity	molecular_function	catalytic activity	3	6861	3	15989	1	0.0789932	0.756997
GO:0017046	peptide hormone binding	molecular_function	binding	3	6861	3	15989	1	0.0789932	0.756997
GO:0019900	kinase binding	molecular_function	binding	25	6861	46	15989	0.543478	0.0784038	0.756997
GO:0019902	phosphatase binding	molecular_function	binding	3	6861	3	15989	1	0.0789932	0.756997
GO:0019903	protein phosphatase binding	molecular_function	binding	3	6861	3	15989	1	0.0789932	0.756997
GO:0033612	receptor serine/threonine kinase binding	molecular_function	binding	12	6861	19	15989	0.631579	0.0610147	0.756997
GO:0034511	U3 snoRNA binding	molecular_function	binding	3	6861	3	15989	1	0.0789932	0.756997
GO:0034513	box H/ACA snoRNA binding	molecular_function	binding	3	6861	3	15989	1	0.0789932	0.756997
GO:0034722	gamma-glutamyl-peptidase activity	molecular_function	catalytic activity	3	6861	3	15989	1	0.0789932	0.756997
GO:0035175	histone kinase activity (H3-S10 specific)	molecular_function	catalytic activity	3	6861	3	15989	1	0.0789932	0.756997
GO:0043394	proteoglycan binding	molecular_function	binding	3	6861	3	15989	1	0.0789932	0.756997
GO:0045549	9-cis-epoxycarotenoid dioxygenase activity	molecular_function	catalytic activity	6	6861	8	15989	0.75	0.0703072	0.756997
GO:0045551	cinnamyl-alcohol dehydrogenase activity	molecular_function	catalytic activity	7	6861	10	15989	0.7	0.0796368	0.756997
GO:0046592	polyamine oxidase activity	molecular_function	catalytic activity	6	6861	8	15989	0.75	0.0703072	0.756997
GO:0046982	protein heterodimerization activity	molecular_function	binding	69	6861	139	15989	0.496403	0.0642656	0.756997
GO:0050660	flavin adenine dinucleotide binding	molecular_function	binding	45	6861	87	15989	0.517241	0.0603556	0.756997
GO:0052747	sinapyl alcohol dehydrogenase activity	molecular_function	catalytic activity	7	6861	10	15989	0.7	0.0796368	0.756997
GO:0052895	N1-acetylspermine:oxygen oxidoreductase (N1-acetylspermidine-forming) activity	molecular_function	catalytic activity	3	6861	3	15989	1	0.0789932	0.756997
GO:0070001	aspartic-type peptidase activity	molecular_function	catalytic activity	3	6861	3	15989	1	0.0789932	0.756997
GO:0080097	L-tryptophan:pyruvate aminotransferase activity	molecular_function	catalytic activity	3	6861	3	15989	1	0.0789932	0.756997
GO:0102229	amylopectin maltohydrolase activity	molecular_function	catalytic activity	6	6861	8	15989	0.75	0.0703072	0.756997
GO:0103075	indole-3-pyruvate monooxygenase activity	molecular_function	catalytic activity	3	6861	3	15989	1	0.0789932	0.756997
GO:1904680	peptide transmembrane transporter activity	molecular_function	transporter activity	34	6861	64	15989	0.53125	0.0639344	0.756997
GO:0005516	calmodulin binding	molecular_function	binding	110	6861	231	15989	0.47619	0.0827145	0.78186
GO:0080030	methyl indole-3-acetate esterase activity	molecular_function	catalytic activity	22	6861	40	15989	0.55	0.0833956	0.783918
GO:0004012	phospholipid-translocating ATPase activity	molecular_function	transporter activity	8	6861	12	15989	0.666667	0.0857699	0.797377
GO:0051020	GTPase binding	molecular_function	binding	8	6861	12	15989	0.666667	0.0857699	0.797377
GO:0008168	methyltransferase activity	molecular_function	catalytic activity	52	6861	104	15989	0.5	0.0864318	0.79914
GO:0005249	voltage-gated potassium channel activity	molecular_function	transporter activity	9	6861	14	15989	0.642857	0.0897468	0.820819
GO:0016308	1-phosphatidylinositol-4-phosphate 5-kinase activity	molecular_function	catalytic activity	9	6861	14	15989	0.642857	0.0897468	0.820819
GO:0005215	transporter activity	molecular_function	transporter activity	37	6861	72	15989	0.513889	0.0910515	0.828275
GO:0044183	protein binding involved in protein folding	molecular_function	binding	10	6861	16	15989	0.625	0.0922202	0.83442
GO:0003774	motor activity	molecular_function	catalytic activity	14	6861	24	15989	0.583333	0.0938396	0.839115
GO:0016671	oxidoreductase activity, acting on a sulfur group of donors, disulfide as acceptor	molecular_function	catalytic activity	14	6861	24	15989	0.583333	0.0938396	0.839115
GO:0032050	clathrin heavy chain binding	molecular_function	binding	12	6861	20	15989	0.6	0.0942268	0.839115
GO:0000107	imidazoleglycerol-phosphate synthase activity	molecular_function	catalytic activity	1	6861	1	15989	1	0.429107	0.862292
GO:0000121	glycerol-1-phosphatase activity	molecular_function	catalytic activity	1	6861	1	15989	1	0.429107	0.862292
GO:0000150	recombinase activity	molecular_function	catalytic activity	3	6861	4	15989	0.75	0.214309	0.862292
GO:0000156	phosphorelay response regulator activity	molecular_function	molecular transducer activity	6	6861	12	15989	0.5	0.414198	0.862292
GO:0000170	sphingosine hydroxylase activity	molecular_function	catalytic activity	6	6861	11	15989	0.545455	0.314314	0.862292
GO:0000175	3'-5'-exoribonuclease activity	molecular_function	catalytic activity	6	6861	10	15989	0.6	0.218895	0.862292
GO:0000213	tRNA-intron endonuclease activity	molecular_function	catalytic activity	1	6861	1	15989	1	0.429107	0.862292
GO:0000293	ferric-chelate reductase activity	molecular_function	catalytic activity	3	6861	5	15989	0.6	0.368831	0.862292
GO:0000309	nicotinamide-nucleotide adenylyltransferase activity	molecular_function	catalytic activity	1	6861	1	15989	1	0.429107	0.862292
GO:0000400	four-way junction DNA binding	molecular_function	binding	3	6861	5	15989	0.6	0.368831	0.862292
GO:0000403	Y-form DNA binding	molecular_function	binding	2	6861	3	15989	0.666667	0.394367	0.862292
GO:0000405	bubble DNA binding	molecular_function	binding	2	6861	3	15989	0.666667	0.394367	0.862292
GO:0000406	double-strand/single-strand DNA junction binding	molecular_function	binding	1	6861	1	15989	1	0.429107	0.862292
GO:0000701	purine-specific mismatch base pair DNA N-glycosylase activity	molecular_function	catalytic activity	1	6861	1	15989	1	0.429107	0.862292
GO:0000900	translation repressor activity, mRNA regulatory element binding	molecular_function	binding	2	6861	2	15989	1	0.184118	0.862292
GO:0000978	RNA polymerase II proximal promoter sequence-specific DNA binding	molecular_function	binding	15	6861	31	15989	0.483871	0.32958	0.862292
GO:0001054	RNA polymerase I activity	molecular_function	catalytic activity	2	6861	2	15989	1	0.184118	0.862292
GO:0001181	RNA polymerase I general transcription initiation factor activity	molecular_function	transcription regulator activity	3	6861	4	15989	0.75	0.214309	0.862292
GO:0001530	lipopolysaccharide binding	molecular_function	binding	1	6861	1	15989	1	0.429107	0.862292
GO:0001734	mRNA (N6-adenosine)-methyltransferase activity	molecular_function	catalytic activity	1	6861	1	15989	1	0.429107	0.862292
GO:0001882	nucleoside binding	molecular_function	binding	1	6861	1	15989	1	0.429107	0.862292
GO:0002094	polyprenyltransferase activity	molecular_function	catalytic activity	3	6861	4	15989	0.75	0.214309	0.862292
GO:0003680	AT DNA binding	molecular_function	binding	16	6861	31	15989	0.516129	0.211673	0.862292
GO:0003684	damaged DNA binding	molecular_function	binding	17	6861	34	15989	0.5	0.252593	0.862292
GO:0003689	DNA clamp loader activity	molecular_function	binding	1	6861	1	15989	1	0.429107	0.862292
GO:0003720	telomerase activity	molecular_function	catalytic activity	1	6861	1	15989	1	0.429107	0.862292
GO:0003721	telomerase RNA reverse transcriptase activity	molecular_function	catalytic activity	1	6861	1	15989	1	0.429107	0.862292
GO:0003725	double-stranded RNA binding	molecular_function	binding	9	6861	16	15989	0.5625	0.203748	0.862292
GO:0003729	mRNA binding	molecular_function	binding	117	6861	261	15989	0.448276	0.284464	0.862292
GO:0003730	mRNA 3'-UTR binding	molecular_function	binding	8	6861	14	15989	0.571429	0.209255	0.862292
GO:0003779	actin binding	molecular_function	binding	25	6861	52	15989	0.480769	0.268578	0.862292
GO:0003785	actin monomer binding	molecular_function	binding	5	6861	9	15989	0.555556	0.33009	0.862292
GO:0003825	alpha,alpha-trehalose-phosphate synthase (UDP-forming) activity	molecular_function	catalytic activity	2	6861	3	15989	0.666667	0.394367	0.862292
GO:0003826	alpha-ketoacid dehydrogenase activity	molecular_function	catalytic activity	3	6861	4	15989	0.75	0.214309	0.862292
GO:0003831	beta-N-acetylglucosaminylglycopeptide beta-1,4-galactosyltransferase activity	molecular_function	catalytic activity	1	6861	1	15989	1	0.429107	0.862292
GO:0003838	sterol 24-C-methyltransferase activity	molecular_function	catalytic activity	2	6861	2	15989	1	0.184118	0.862292
GO:0003839	gamma-glutamylcyclotransferase activity	molecular_function	catalytic activity	2	6861	3	15989	0.666667	0.394367	0.862292
GO:0003842	1-pyrroline-5-carboxylate dehydrogenase activity	molecular_function	catalytic activity	1	6861	1	15989	1	0.429107	0.862292
GO:0003856	3-dehydroquinate synthase activity	molecular_function	catalytic activity	1	6861	1	15989	1	0.429107	0.862292
GO:0003857	3-hydroxyacyl-CoA dehydrogenase activity	molecular_function	catalytic activity	4	6861	6	15989	0.666667	0.221791	0.862292
GO:0003863	3-methyl-2-oxobutanoate dehydrogenase (2-methylpropanoyl-transferring) activity	molecular_function	catalytic activity	4	6861	5	15989	0.8	0.111293	0.862292
GO:0003864	3-methyl-2-oxobutanoate hydroxymethyltransferase activity	molecular_function	catalytic activity	1	6861	1	15989	1	0.429107	0.862292
GO:0003868	4-hydroxyphenylpyruvate dioxygenase activity	molecular_function	catalytic activity	2	6861	2	15989	1	0.184118	0.862292
GO:0003872	6-phosphofructokinase activity	molecular_function	catalytic activity	6	6861	12	15989	0.5	0.414198	0.862292
GO:0003873	6-phosphofructo-2-kinase activity	molecular_function	catalytic activity	1	6861	1	15989	1	0.429107	0.862292
GO:0003914	DNA (6-4) photolyase activity	molecular_function	catalytic activity	1	6861	1	15989	1	0.429107	0.862292
GO:0003919	FMN adenylyltransferase activity	molecular_function	catalytic activity	3	6861	5	15989	0.6	0.368831	0.862292
GO:0003922	GMP synthase (glutamine-hydrolyzing) activity	molecular_function	catalytic activity	1	6861	1	15989	1	0.429107	0.862292
GO:0003934	GTP cyclohydrolase I activity	molecular_function	catalytic activity	1	6861	1	15989	1	0.429107	0.862292
GO:0003937	IMP cyclohydrolase activity	molecular_function	catalytic activity	1	6861	1	15989	1	0.429107	0.862292
GO:0003958	NADPH-hemoprotein reductase activity	molecular_function	catalytic activity	2	6861	3	15989	0.666667	0.394367	0.862292
GO:0003959	NADPH dehydrogenase activity	molecular_function	catalytic activity	2	6861	2	15989	1	0.184118	0.862292
GO:0003978	UDP-glucose 4-epimerase activity	molecular_function	catalytic activity	5	6861	8	15989	0.625	0.221896	0.862292
GO:0003984	acetolactate synthase activity	molecular_function	catalytic activity	4	6861	6	15989	0.666667	0.221791	0.862292
GO:0003985	acetyl-CoA C-acetyltransferase activity	molecular_function	catalytic activity	2	6861	3	15989	0.666667	0.394367	0.862292
GO:0003987	acetate-CoA ligase activity	molecular_function	catalytic activity	3	6861	4	15989	0.75	0.214309	0.862292
GO:0003988	acetyl-CoA C-acyltransferase activity	molecular_function	catalytic activity	4	6861	5	15989	0.8	0.111293	0.862292
GO:0003991	acetylglutamate kinase activity	molecular_function	catalytic activity	1	6861	1	15989	1	0.429107	0.862292
GO:0003993	acid phosphatase activity	molecular_function	catalytic activity	20	6861	40	15989	0.5	0.226698	0.862292
GO:0004014	adenosylmethionine decarboxylase activity	molecular_function	catalytic activity	3	6861	5	15989	0.6	0.368831	0.862292
GO:0004015	adenosylmethionine-8-amino-7-oxononanoate transaminase activity	molecular_function	catalytic activity	3	6861	5	15989	0.6	0.368831	0.862292
GO:0004026	alcohol O-acetyltransferase activity	molecular_function	catalytic activity	1	6861	1	15989	1	0.429107	0.862292
GO:0004038	allantoinase activity	molecular_function	catalytic activity	1	6861	1	15989	1	0.429107	0.862292
GO:0004047	aminomethyltransferase activity	molecular_function	catalytic activity	1	6861	1	15989	1	0.429107	0.862292
GO:0004055	argininosuccinate synthase activity	molecular_function	catalytic activity	1	6861	1	15989	1	0.429107	0.862292
GO:0004056	argininosuccinate lyase activity	molecular_function	catalytic activity	1	6861	1	15989	1	0.429107	0.862292
GO:0004070	aspartate carbamoyltransferase activity	molecular_function	catalytic activity	1	6861	1	15989	1	0.429107	0.862292
GO:0004112	cyclic-nucleotide phosphodiesterase activity	molecular_function	catalytic activity	1	6861	1	15989	1	0.429107	0.862292
GO:0004123	cystathionine gamma-lyase activity	molecular_function	catalytic activity	2	6861	2	15989	1	0.184118	0.862292
GO:0004126	cytidine deaminase activity	molecular_function	catalytic activity	1	6861	1	15989	1	0.429107	0.862292
GO:0004132	dCMP deaminase activity	molecular_function	catalytic activity	1	6861	1	15989	1	0.429107	0.862292
GO:0004141	dethiobiotin synthase activity	molecular_function	catalytic activity	1	6861	1	15989	1	0.429107	0.862292
GO:0004143	diacylglycerol kinase activity	molecular_function	catalytic activity	5	6861	8	15989	0.625	0.221896	0.862292
GO:0004144	diacylglycerol O-acyltransferase activity	molecular_function	catalytic activity	7	6861	11	15989	0.636364	0.139379	0.862292
GO:0004146	dihydrofolate reductase activity	molecular_function	catalytic activity	1	6861	1	15989	1	0.429107	0.862292
GO:0004147	dihydrolipoamide branched chain acyltransferase activity	molecular_function	catalytic activity	1	6861	1	15989	1	0.429107	0.862292
GO:0004151	dihydroorotase activity	molecular_function	catalytic activity	1	6861	1	15989	1	0.429107	0.862292
GO:0004152	dihydroorotate dehydrogenase activity	molecular_function	catalytic activity	1	6861	1	15989	1	0.429107	0.862292
GO:0004157	dihydropyrimidinase activity	molecular_function	catalytic activity	1	6861	1	15989	1	0.429107	0.862292
GO:0004164	diphthine synthase activity	molecular_function	catalytic activity	1	6861	1	15989	1	0.429107	0.862292
GO:0004170	dUTP diphosphatase activity	molecular_function	catalytic activity	2	6861	3	15989	0.666667	0.394367	0.862292
GO:0004180	carboxypeptidase activity	molecular_function	catalytic activity	2	6861	3	15989	0.666667	0.394367	0.862292
GO:0004252	serine-type endopeptidase activity	molecular_function	catalytic activity	59	6861	132	15989	0.44697	0.370115	0.862292
GO:0004301	epoxide hydrolase activity	molecular_function	catalytic activity	1	6861	1	15989	1	0.429107	0.862292
GO:0004305	ethanolamine kinase activity	molecular_function	catalytic activity	1	6861	1	15989	1	0.429107	0.862292
GO:0004310	farnesyl-diphosphate farnesyltransferase activity	molecular_function	catalytic activity	4	6861	7	15989	0.571429	0.347975	0.862292
GO:0004314	[acyl-carrier-protein] S-malonyltransferase activity	molecular_function	catalytic activity	1	6861	1	15989	1	0.429107	0.862292
GO:0004315	3-oxoacyl-[acyl-carrier-protein] synthase activity	molecular_function	catalytic activity	6	6861	9	15989	0.666667	0.13534	0.862292
GO:0004316	3-oxoacyl-[acyl-carrier-protein] reductase (NADPH) activity	molecular_function	catalytic activity	2	6861	3	15989	0.666667	0.394367	0.862292
GO:0004318	enoyl-[acyl-carrier-protein] reductase (NADH) activity	molecular_function	catalytic activity	2	6861	2	15989	1	0.184118	0.862292
GO:0004321	fatty-acyl-CoA synthase activity	molecular_function	catalytic activity	2	6861	3	15989	0.666667	0.394367	0.862292
GO:0004325	ferrochelatase activity	molecular_function	catalytic activity	2	6861	3	15989	0.666667	0.394367	0.862292
GO:0004328	formamidase activity	molecular_function	catalytic activity	1	6861	1	15989	1	0.429107	0.862292
GO:0004331	fructose-2,6-bisphosphate 2-phosphatase activity	molecular_function	catalytic activity	1	6861	1	15989	1	0.429107	0.862292
GO:0004332	fructose-bisphosphate aldolase activity	molecular_function	catalytic activity	6	6861	10	15989	0.6	0.218895	0.862292
GO:0004338	glucan exo-1,3-beta-glucosidase activity	molecular_function	catalytic activity	2	6861	2	15989	1	0.184118	0.862292
GO:0004349	glutamate 5-kinase activity	molecular_function	catalytic activity	2	6861	3	15989	0.666667	0.394367	0.862292
GO:0004350	glutamate-5-semialdehyde dehydrogenase activity	molecular_function	catalytic activity	2	6861	3	15989	0.666667	0.394367	0.862292
GO:0004351	glutamate decarboxylase activity	molecular_function	catalytic activity	3	6861	5	15989	0.6	0.368831	0.862292
GO:0004353	glutamate dehydrogenase [NAD(P)+] activity	molecular_function	catalytic activity	2	6861	3	15989	0.666667	0.394367	0.862292
GO:0004364	glutathione transferase activity	molecular_function	catalytic activity	32	6861	66	15989	0.484848	0.213583	0.862292
GO:0004365	glyceraldehyde-3-phosphate dehydrogenase (NAD+) (phosphorylating) activity	molecular_function	catalytic activity	3	6861	4	15989	0.75	0.214309	0.862292
GO:0004370	glycerol kinase activity	molecular_function	catalytic activity	1	6861	1	15989	1	0.429107	0.862292
GO:0004371	glycerone kinase activity	molecular_function	catalytic activity	1	6861	1	15989	1	0.429107	0.862292
GO:0004375	glycine dehydrogenase (decarboxylating) activity	molecular_function	catalytic activity	1	6861	1	15989	1	0.429107	0.862292
GO:0004396	hexokinase activity	molecular_function	catalytic activity	3	6861	5	15989	0.6	0.368831	0.862292
GO:0004401	histidinol-phosphatase activity	molecular_function	catalytic activity	1	6861	1	15989	1	0.429107	0.862292
GO:0004418	hydroxymethylbilane synthase activity	molecular_function	catalytic activity	1	6861	1	15989	1	0.429107	0.862292
GO:0004419	hydroxymethylglutaryl-CoA lyase activity	molecular_function	catalytic activity	2	6861	3	15989	0.666667	0.394367	0.862292
GO:0004439	phosphatidylinositol-4,5-bisphosphate 5-phosphatase activity	molecular_function	catalytic activity	10	6861	19	15989	0.526316	0.264425	0.862292
GO:0004450	isocitrate dehydrogenase (NADP+) activity	molecular_function	catalytic activity	2	6861	3	15989	0.666667	0.394367	0.862292
GO:0004451	isocitrate lyase activity	molecular_function	catalytic activity	1	6861	1	15989	1	0.429107	0.862292
GO:0004467	long-chain fatty acid-CoA ligase activity	molecular_function	catalytic activity	7	6861	12	15989	0.583333	0.214431	0.862292
GO:0004470	malic enzyme activity	molecular_function	catalytic activity	2	6861	2	15989	1	0.184118	0.862292
GO:0004473	malate dehydrogenase (decarboxylating) (NADP+) activity	molecular_function	catalytic activity	3	6861	5	15989	0.6	0.368831	0.862292
GO:0004482	mRNA (guanine-N7-)-methyltransferase activity	molecular_function	catalytic activity	2	6861	3	15989	0.666667	0.394367	0.862292
GO:0004497	monooxygenase activity	molecular_function	catalytic activity	101	6861	227	15989	0.444934	0.337195	0.862292
GO:0004499	N,N-dimethylaniline monooxygenase activity	molecular_function	catalytic activity	10	6861	18	15989	0.555556	0.19812	0.862292
GO:0004512	inositol-3-phosphate synthase activity	molecular_function	catalytic activity	2	6861	3	15989	0.666667	0.394367	0.862292
GO:0004515	nicotinate-nucleotide adenylyltransferase activity	molecular_function	catalytic activity	1	6861	1	15989	1	0.429107	0.862292
GO:0004516	nicotinate phosphoribosyltransferase activity	molecular_function	catalytic activity	2	6861	2	15989	1	0.184118	0.862292
GO:0004518	nuclease activity	molecular_function	catalytic activity	7	6861	14	15989	0.5	0.391029	0.862292
GO:0004536	deoxyribonuclease activity	molecular_function	catalytic activity	1	6861	1	15989	1	0.429107	0.862292
GO:0004550	nucleoside diphosphate kinase activity	molecular_function	catalytic activity	6	6861	12	15989	0.5	0.414198	0.862292
GO:0004556	alpha-amylase activity	molecular_function	catalytic activity	4	6861	5	15989	0.8	0.111293	0.862292
GO:0004567	beta-mannosidase activity	molecular_function	catalytic activity	1	6861	1	15989	1	0.429107	0.862292
GO:0004568	chitinase activity	molecular_function	catalytic activity	13	6861	23	15989	0.565217	0.134005	0.862292
GO:0004575	sucrose alpha-glucosidase activity	molecular_function	catalytic activity	6	6861	9	15989	0.666667	0.13534	0.862292
GO:0004601	peroxidase activity	molecular_function	catalytic activity	67	6861	149	15989	0.449664	0.333895	0.862292
GO:0004602	glutathione peroxidase activity	molecular_function	antioxidant activity	5	6861	7	15989	0.714286	0.127153	0.862292
GO:0004607	phosphatidylcholine-sterol O-acyltransferase activity	molecular_function	catalytic activity	1	6861	1	15989	1	0.429107	0.862292
GO:0004612	phosphoenolpyruvate carboxykinase (ATP) activity	molecular_function	catalytic activity	2	6861	2	15989	1	0.184118	0.862292
GO:0004616	phosphogluconate dehydrogenase (decarboxylating) activity	molecular_function	catalytic activity	2	6861	3	15989	0.666667	0.394367	0.862292
GO:0004617	phosphoglycerate dehydrogenase activity	molecular_function	catalytic activity	4	6861	7	15989	0.571429	0.347975	0.862292
GO:0004630	phospholipase D activity	molecular_function	catalytic activity	8	6861	16	15989	0.5	0.37074	0.862292
GO:0004641	phosphoribosylformylglycinamidine cyclo-ligase activity	molecular_function	catalytic activity	1	6861	1	15989	1	0.429107	0.862292
GO:0004643	phosphoribosylaminoimidazolecarboxamide formyltransferase activity	molecular_function	catalytic activity	1	6861	1	15989	1	0.429107	0.862292
GO:0004648	O-phospho-L-serine:2-oxoglutarate aminotransferase activity	molecular_function	catalytic activity	1	6861	1	15989	1	0.429107	0.862292
GO:0004657	proline dehydrogenase activity	molecular_function	catalytic activity	2	6861	2	15989	1	0.184118	0.862292
GO:0004668	protein-arginine deiminase activity	molecular_function	catalytic activity	1	6861	1	15989	1	0.429107	0.862292
GO:0004693	cyclin-dependent protein serine/threonine kinase activity	molecular_function	catalytic activity	14	6861	29	15989	0.482759	0.343448	0.862292
GO:0004722	protein serine/threonine phosphatase activity	molecular_function	catalytic activity	44	6861	97	15989	0.453608	0.348284	0.862292
GO:0004723	calcium-dependent protein serine/threonine phosphatase activity	molecular_function	catalytic activity	2	6861	2	15989	1	0.184118	0.862292
GO:0004724	magnesium-dependent protein serine/threonine phosphatase activity	molecular_function	catalytic activity	38	6861	84	15989	0.452381	0.372229	0.862292
GO:0004726	non-membrane spanning protein tyrosine phosphatase activity	molecular_function	catalytic activity	1	6861	1	15989	1	0.429107	0.862292
GO:0004730	pseudouridylate synthase activity	molecular_function	catalytic activity	1	6861	1	15989	1	0.429107	0.862292
GO:0004753	saccharopine dehydrogenase activity	molecular_function	catalytic activity	1	6861	1	15989	1	0.429107	0.862292
GO:0004760	serine-pyruvate transaminase activity	molecular_function	catalytic activity	1	6861	1	15989	1	0.429107	0.862292
GO:0004766	spermidine synthase activity	molecular_function	catalytic activity	3	6861	4	15989	0.75	0.214309	0.862292
GO:0004793	threonine aldolase activity	molecular_function	catalytic activity	1	6861	1	15989	1	0.429107	0.862292
GO:0004794	L-threonine ammonia-lyase activity	molecular_function	catalytic activity	2	6861	3	15989	0.666667	0.394367	0.862292
GO:0004797	thymidine kinase activity	molecular_function	catalytic activity	2	6861	2	15989	1	0.184118	0.862292
GO:0004798	thymidylate kinase activity	molecular_function	catalytic activity	1	6861	1	15989	1	0.429107	0.862292
GO:0004799	thymidylate synthase activity	molecular_function	catalytic activity	1	6861	1	15989	1	0.429107	0.862292
GO:0004805	trehalose-phosphatase activity	molecular_function	catalytic activity	5	6861	9	15989	0.555556	0.33009	0.862292
GO:0004809	tRNA (guanine-N2-)-methyltransferase activity	molecular_function	catalytic activity	2	6861	2	15989	1	0.184118	0.862292
GO:0004827	proline-tRNA ligase activity	molecular_function	catalytic activity	2	6861	3	15989	0.666667	0.394367	0.862292
GO:0004828	serine-tRNA ligase activity	molecular_function	catalytic activity	2	6861	2	15989	1	0.184118	0.862292
GO:0004844	uracil DNA N-glycosylase activity	molecular_function	catalytic activity	1	6861	1	15989	1	0.429107	0.862292
GO:0004846	urate oxidase activity	molecular_function	catalytic activity	1	6861	1	15989	1	0.429107	0.862292
GO:0004852	uroporphyrinogen-III synthase activity	molecular_function	catalytic activity	2	6861	2	15989	1	0.184118	0.862292
GO:0004853	uroporphyrinogen decarboxylase activity	molecular_function	catalytic activity	2	6861	2	15989	1	0.184118	0.862292
GO:0004860	protein kinase inhibitor activity	molecular_function	molecular function regulator	3	6861	4	15989	0.75	0.214309	0.862292
GO:0004866	endopeptidase inhibitor activity	molecular_function	molecular function regulator	6	6861	11	15989	0.545455	0.314314	0.862292
GO:0004869	cysteine-type endopeptidase inhibitor activity	molecular_function	molecular function regulator	8	6861	13	15989	0.615385	0.140964	0.862292
GO:0005034	osmosensor activity	molecular_function	molecular transducer activity	1	6861	1	15989	1	0.429107	0.862292
GO:0005089	Rho guanyl-nucleotide exchange factor activity	molecular_function	molecular function regulator	9	6861	15	15989	0.6	0.141014	0.862292
GO:0005179	hormone activity	molecular_function	binding	7	6861	11	15989	0.636364	0.139379	0.862292
GO:0005216	ion channel activity	molecular_function	transporter activity	9	6861	15	15989	0.6	0.141014	0.862292
GO:0005267	potassium channel activity	molecular_function	transporter activity	2	6861	3	15989	0.666667	0.394367	0.862292
GO:0005347	ATP transmembrane transporter activity	molecular_function	transporter activity	3	6861	5	15989	0.6	0.368831	0.862292
GO:0005354	galactose transmembrane transporter activity	molecular_function	transporter activity	2	6861	2	15989	1	0.184118	0.862292
GO:0005358	high-affinity glucose:proton symporter activity	molecular_function	transporter activity	1	6861	1	15989	1	0.429107	0.862292
GO:0005365	myo-inositol transmembrane transporter activity	molecular_function	transporter activity	1	6861	1	15989	1	0.429107	0.862292
GO:0005366	myo-inositol:proton symporter activity	molecular_function	transporter activity	4	6861	5	15989	0.8	0.111293	0.862292
GO:0005452	inorganic anion exchanger activity	molecular_function	transporter activity	3	6861	5	15989	0.6	0.368831	0.862292
GO:0005471	ATP:ADP antiporter activity	molecular_function	transporter activity	4	6861	7	15989	0.571429	0.347975	0.862292
GO:0005509	calcium ion binding	molecular_function	binding	110	6861	244	15989	0.45082	0.265314	0.862292
GO:0005515	protein binding	molecular_function	binding	7	6861	14	15989	0.5	0.391029	0.862292
GO:0005522	profilin binding	molecular_function	binding	1	6861	1	15989	1	0.429107	0.862292
GO:0005536	glucose binding	molecular_function	binding	4	6861	6	15989	0.666667	0.221791	0.862292
GO:0005543	phospholipid binding	molecular_function	binding	13	6861	24	15989	0.541667	0.181473	0.862292
GO:0005545	1-phosphatidylinositol binding	molecular_function	binding	10	6861	17	15989	0.588235	0.140063	0.862292
GO:0005546	phosphatidylinositol-4,5-bisphosphate binding	molecular_function	binding	11	6861	20	15989	0.55	0.19249	0.862292
GO:0005547	phosphatidylinositol-3,4,5-trisphosphate binding	molecular_function	binding	1	6861	1	15989	1	0.429107	0.862292
GO:0008061	chitin binding	molecular_function	binding	15	6861	27	15989	0.555556	0.12872	0.862292
GO:0008080	N-acetyltransferase activity	molecular_function	catalytic activity	7	6861	12	15989	0.583333	0.214431	0.862292
GO:0008081	phosphoric diester hydrolase activity	molecular_function	catalytic activity	5	6861	8	15989	0.625	0.221896	0.862292
GO:0008083	growth factor activity	molecular_function	binding	3	6861	4	15989	0.75	0.214309	0.862292
GO:0008094	DNA-dependent ATPase activity	molecular_function	catalytic activity	9	6861	18	15989	0.5	0.352668	0.862292
GO:0008097	5S rRNA binding	molecular_function	binding	4	6861	5	15989	0.8	0.111293	0.862292
GO:0008126	acetylesterase activity	molecular_function	catalytic activity	2	6861	2	15989	1	0.184118	0.862292
GO:0008143	poly(A) binding	molecular_function	binding	7	6861	13	15989	0.538462	0.300142	0.862292
GO:0008171	O-methyltransferase activity	molecular_function	catalytic activity	8	6861	16	15989	0.5	0.37074	0.862292
GO:0008235	metalloexopeptidase activity	molecular_function	catalytic activity	2	6861	3	15989	0.666667	0.394367	0.862292
GO:0008253	5'-nucleotidase activity	molecular_function	catalytic activity	1	6861	1	15989	1	0.429107	0.862292
GO:0008266	poly(U) RNA binding	molecular_function	binding	5	6861	8	15989	0.625	0.221896	0.862292
GO:0008271	secondary active sulfate transmembrane transporter activity	molecular_function	transporter activity	9	6861	15	15989	0.6	0.141014	0.862292
GO:0008289	lipid binding	molecular_function	binding	63	6861	133	15989	0.473684	0.169694	0.862292
GO:0008296	3'-5'-exodeoxyribonuclease activity	molecular_function	catalytic activity	2	6861	3	15989	0.666667	0.394367	0.862292
GO:0008309	double-stranded DNA exodeoxyribonuclease activity	molecular_function	catalytic activity	1	6861	1	15989	1	0.429107	0.862292
GO:0008310	single-stranded DNA 3'-5' exodeoxyribonuclease activity	molecular_function	catalytic activity	1	6861	1	15989	1	0.429107	0.862292
GO:0008320	protein transmembrane transporter activity	molecular_function	transporter activity	6	6861	12	15989	0.5	0.414198	0.862292
GO:0008324	cation transmembrane transporter activity	molecular_function	transporter activity	9	6861	17	15989	0.529412	0.275394	0.862292
GO:0008381	mechanosensitive ion channel activity	molecular_function	transporter activity	4	6861	7	15989	0.571429	0.347975	0.862292
GO:0008409	5'-3' exonuclease activity	molecular_function	catalytic activity	4	6861	6	15989	0.666667	0.221791	0.862292
GO:0008453	alanine-glyoxylate transaminase activity	molecular_function	catalytic activity	3	6861	4	15989	0.75	0.214309	0.862292
GO:0008460	dTDP-glucose 4,6-dehydratase activity	molecular_function	catalytic activity	2	6861	2	15989	1	0.184118	0.862292
GO:0008470	isovaleryl-CoA dehydrogenase activity	molecular_function	catalytic activity	1	6861	1	15989	1	0.429107	0.862292
GO:0008482	sulfite oxidase activity	molecular_function	catalytic activity	1	6861	1	15989	1	0.429107	0.862292
GO:0008494	translation activator activity	molecular_function	binding	2	6861	2	15989	1	0.184118	0.862292
GO:0008509	anion transmembrane transporter activity	molecular_function	transporter activity	2	6861	3	15989	0.666667	0.394367	0.862292
GO:0008519	ammonium transmembrane transporter activity	molecular_function	transporter activity	4	6861	7	15989	0.571429	0.347975	0.862292
GO:0008531	riboflavin kinase activity	molecular_function	catalytic activity	2	6861	2	15989	1	0.184118	0.862292
GO:0008536	Ran GTPase binding	molecular_function	binding	9	6861	18	15989	0.5	0.352668	0.862292
GO:0008559	xenobiotic transmembrane transporting ATPase activity	molecular_function	catalytic activity	4	6861	7	15989	0.571429	0.347975	0.862292
GO:0008569	ATP-dependent microtubule motor activity, minus-end-directed	molecular_function	catalytic activity	2	6861	3	15989	0.666667	0.394367	0.862292
GO:0008649	rRNA methyltransferase activity	molecular_function	catalytic activity	1	6861	1	15989	1	0.429107	0.862292
GO:0008685	2-C-methyl-D-erythritol 2,4-cyclodiphosphate synthase activity	molecular_function	catalytic activity	1	6861	1	15989	1	0.429107	0.862292
GO:0008692	3-hydroxybutyryl-CoA epimerase activity	molecular_function	catalytic activity	4	6861	6	15989	0.666667	0.221791	0.862292
GO:0008696	4-amino-4-deoxychorismate lyase activity	molecular_function	catalytic activity	1	6861	1	15989	1	0.429107	0.862292
GO:0008710	8-amino-7-oxononanoate synthase activity	molecular_function	catalytic activity	1	6861	1	15989	1	0.429107	0.862292
GO:0008732	L-allo-threonine aldolase activity	molecular_function	catalytic activity	1	6861	1	15989	1	0.429107	0.862292
GO:0008756	o-succinylbenzoate-CoA ligase activity	molecular_function	catalytic activity	1	6861	1	15989	1	0.429107	0.862292
GO:0008759	UDP-3-O-[3-hydroxymyristoyl] N-acetylglucosamine deacetylase activity	molecular_function	catalytic activity	1	6861	1	15989	1	0.429107	0.862292
GO:0008810	cellulase activity	molecular_function	catalytic activity	11	6861	19	15989	0.578947	0.138445	0.862292
GO:0008824	cyanate hydratase activity	molecular_function	catalytic activity	1	6861	1	15989	1	0.429107	0.862292
GO:0008836	diaminopimelate decarboxylase activity	molecular_function	catalytic activity	1	6861	1	15989	1	0.429107	0.862292
GO:0008839	4-hydroxy-tetrahydrodipicolinate reductase	molecular_function	catalytic activity	2	6861	2	15989	1	0.184118	0.862292
GO:0008840	4-hydroxy-tetrahydrodipicolinate synthase	molecular_function	catalytic activity	2	6861	2	15989	1	0.184118	0.862292
GO:0008843	endochitinase activity	molecular_function	catalytic activity	1	6861	1	15989	1	0.429107	0.862292
GO:0008934	inositol monophosphate 1-phosphatase activity	molecular_function	catalytic activity	3	6861	5	15989	0.6	0.368831	0.862292
GO:0008936	nicotinamidase activity	molecular_function	catalytic activity	2	6861	2	15989	1	0.184118	0.862292
GO:0008948	oxaloacetate decarboxylase activity	molecular_function	catalytic activity	3	6861	5	15989	0.6	0.368831	0.862292
GO:0008970	phospholipase A1 activity	molecular_function	catalytic activity	16	6861	32	15989	0.5	0.262255	0.862292
GO:0008974	phosphoribulokinase activity	molecular_function	catalytic activity	1	6861	1	15989	1	0.429107	0.862292
GO:0009020	tRNA (guanosine-2'-O-)-methyltransferase activity	molecular_function	catalytic activity	1	6861	1	15989	1	0.429107	0.862292
GO:0009055	electron transfer activity	molecular_function	catalytic activity	66	6861	149	15989	0.442953	0.396126	0.862292
GO:0009496	plastoquinol--plastocyanin reductase activity	molecular_function	catalytic activity	1	6861	1	15989	1	0.429107	0.862292
GO:0009540	zeaxanthin epoxidase [overall] activity	molecular_function	catalytic activity	1	6861	1	15989	1	0.429107	0.862292
GO:0009679	hexose:proton symporter activity	molecular_function	transporter activity	2	6861	2	15989	1	0.184118	0.862292
GO:0009703	nitrate reductase (NADH) activity	molecular_function	catalytic activity	1	6861	1	15989	1	0.429107	0.862292
GO:0009815	1-aminocyclopropane-1-carboxylate oxidase activity	molecular_function	catalytic activity	4	6861	5	15989	0.8	0.111293	0.862292
GO:0009916	alternative oxidase activity	molecular_function	catalytic activity	4	6861	5	15989	0.8	0.111293	0.862292
GO:0009940	amino-terminal vacuolar sorting propeptide binding	molecular_function	binding	2	6861	2	15989	1	0.184118	0.862292
GO:0009976	tocopherol cyclase activity	molecular_function	catalytic activity	1	6861	1	15989	1	0.429107	0.862292
GO:0010178	IAA-amino acid conjugate hydrolase activity	molecular_function	catalytic activity	1	6861	1	15989	1	0.429107	0.862292
GO:0010179	IAA-Ala conjugate hydrolase activity	molecular_function	catalytic activity	2	6861	3	15989	0.666667	0.394367	0.862292
GO:0010181	FMN binding	molecular_function	binding	16	6861	31	15989	0.516129	0.211673	0.862292
GO:0010277	chlorophyllide a oxygenase [overall] activity	molecular_function	catalytic activity	4	6861	5	15989	0.8	0.111293	0.862292
GO:0010279	indole-3-acetic acid amido synthetase activity	molecular_function	catalytic activity	3	6861	4	15989	0.75	0.214309	0.862292
GO:0010280	UDP-L-rhamnose synthase activity	molecular_function	catalytic activity	2	6861	3	15989	0.666667	0.394367	0.862292
GO:0010291	carotene beta-ring hydroxylase activity	molecular_function	catalytic activity	1	6861	1	15989	1	0.429107	0.862292
GO:0010295	(+)-abscisic acid 8'-hydroxylase activity	molecular_function	catalytic activity	2	6861	3	15989	0.666667	0.394367	0.862292
GO:0010326	methionine-oxo-acid transaminase activity	molecular_function	catalytic activity	1	6861	1	15989	1	0.429107	0.862292
GO:0010427	abscisic acid binding	molecular_function	binding	11	6861	19	15989	0.578947	0.138445	0.862292
GO:0010428	methyl-CpNpG binding	molecular_function	binding	3	6861	5	15989	0.6	0.368831	0.862292
GO:0010429	methyl-CpNpN binding	molecular_function	binding	3	6861	5	15989	0.6	0.368831	0.862292
GO:0010486	manganese:proton antiporter activity	molecular_function	transporter activity	1	6861	1	15989	1	0.429107	0.862292
GO:0010487	thermospermine synthase activity	molecular_function	catalytic activity	2	6861	3	15989	0.666667	0.394367	0.862292
GO:0010488	UDP-galactose:N-glycan beta-1,3-galactosyltransferase activity	molecular_function	catalytic activity	1	6861	1	15989	1	0.429107	0.862292
GO:0015086	cadmium ion transmembrane transporter activity	molecular_function	transporter activity	3	6861	4	15989	0.75	0.214309	0.862292
GO:0015087	cobalt ion transmembrane transporter activity	molecular_function	transporter activity	1	6861	1	15989	1	0.429107	0.862292
GO:0015112	nitrate transmembrane transporter activity	molecular_function	transporter activity	10	6861	17	15989	0.588235	0.140063	0.862292
GO:0015114	phosphate ion transmembrane transporter activity	molecular_function	transporter activity	5	6861	8	15989	0.625	0.221896	0.862292
GO:0015148	D-xylose transmembrane transporter activity	molecular_function	transporter activity	1	6861	1	15989	1	0.429107	0.862292
GO:0015172	acidic amino acid transmembrane transporter activity	molecular_function	transporter activity	2	6861	2	15989	1	0.184118	0.862292
GO:0015175	neutral amino acid transmembrane transporter activity	molecular_function	transporter activity	4	6861	7	15989	0.571429	0.347975	0.862292
GO:0015181	arginine transmembrane transporter activity	molecular_function	transporter activity	3	6861	4	15989	0.75	0.214309	0.862292
GO:0015193	L-proline transmembrane transporter activity	molecular_function	transporter activity	1	6861	1	15989	1	0.429107	0.862292
GO:0015203	polyamine transmembrane transporter activity	molecular_function	transporter activity	6	6861	9	15989	0.666667	0.13534	0.862292
GO:0015205	nucleobase transmembrane transporter activity	molecular_function	transporter activity	1	6861	1	15989	1	0.429107	0.862292
GO:0015207	adenine transmembrane transporter activity	molecular_function	transporter activity	2	6861	2	15989	1	0.184118	0.862292
GO:0015208	guanine transmembrane transporter activity	molecular_function	transporter activity	2	6861	2	15989	1	0.184118	0.862292
GO:0015210	uracil transmembrane transporter activity	molecular_function	transporter activity	3	6861	5	15989	0.6	0.368831	0.862292
GO:0015211	purine nucleoside transmembrane transporter activity	molecular_function	transporter activity	2	6861	3	15989	0.666667	0.394367	0.862292
GO:0015228	coenzyme A transmembrane transporter activity	molecular_function	transporter activity	2	6861	2	15989	1	0.184118	0.862292
GO:0015247	aminophospholipid transmembrane transporter activity	molecular_function	transporter activity	2	6861	3	15989	0.666667	0.394367	0.862292
GO:0015250	water channel activity	molecular_function	transporter activity	8	6861	15	15989	0.533333	0.287244	0.862292
GO:0015271	outward rectifier potassium channel activity	molecular_function	transporter activity	1	6861	1	15989	1	0.429107	0.862292
GO:0015294	solute:cation symporter activity	molecular_function	transporter activity	2	6861	2	15989	1	0.184118	0.862292
GO:0015334	high-affinity oligopeptide transmembrane transporter activity	molecular_function	transporter activity	1	6861	1	15989	1	0.429107	0.862292
GO:0015369	calcium:proton antiporter activity	molecular_function	transporter activity	6	6861	10	15989	0.6	0.218895	0.862292
GO:0015386	potassium:proton antiporter activity	molecular_function	transporter activity	5	6861	8	15989	0.625	0.221896	0.862292
GO:0015398	high-affinity secondary active ammonium transmembrane transporter activity	molecular_function	transporter activity	1	6861	1	15989	1	0.429107	0.862292
GO:0015450	P-P-bond-hydrolysis-driven protein transmembrane transporter activity	molecular_function	transporter activity	7	6861	13	15989	0.538462	0.300142	0.862292
GO:0015575	mannitol transmembrane transporter activity	molecular_function	transporter activity	1	6861	1	15989	1	0.429107	0.862292
GO:0015576	sorbitol transmembrane transporter activity	molecular_function	transporter activity	1	6861	1	15989	1	0.429107	0.862292
GO:0015578	mannose transmembrane transporter activity	molecular_function	transporter activity	1	6861	1	15989	1	0.429107	0.862292
GO:0015591	D-ribose transmembrane transporter activity	molecular_function	transporter activity	1	6861	1	15989	1	0.429107	0.862292
GO:0015929	hexosaminidase activity	molecular_function	catalytic activity	1	6861	1	15989	1	0.429107	0.862292
GO:0016040	glutamate synthase (NADH) activity	molecular_function	catalytic activity	1	6861	1	15989	1	0.429107	0.862292
GO:0016041	glutamate synthase (ferredoxin) activity	molecular_function	catalytic activity	1	6861	1	15989	1	0.429107	0.862292
GO:0016166	phytoene dehydrogenase activity	molecular_function	catalytic activity	1	6861	1	15989	1	0.429107	0.862292
GO:0016279	protein-lysine N-methyltransferase activity	molecular_function	catalytic activity	4	6861	7	15989	0.571429	0.347975	0.862292
GO:0016298	lipase activity	molecular_function	catalytic activity	22	6861	45	15989	0.488889	0.253371	0.862292
GO:0016301	kinase activity	molecular_function	catalytic activity	89	6861	187	15989	0.475936	0.110157	0.862292
GO:0016405	CoA-ligase activity	molecular_function	catalytic activity	1	6861	1	15989	1	0.429107	0.862292
GO:0016410	N-acyltransferase activity	molecular_function	catalytic activity	2	6861	3	15989	0.666667	0.394367	0.862292
GO:0016413	O-acetyltransferase activity	molecular_function	catalytic activity	32	6861	70	15989	0.457143	0.359963	0.862292
GO:0016422	mRNA (2'-O-methyladenosine-N6-)-methyltransferase activity	molecular_function	catalytic activity	1	6861	1	15989	1	0.429107	0.862292
GO:0016423	tRNA (guanine) methyltransferase activity	molecular_function	catalytic activity	1	6861	1	15989	1	0.429107	0.862292
GO:0016462	pyrophosphatase activity	molecular_function	catalytic activity	4	6861	6	15989	0.666667	0.221791	0.862292
GO:0016530	metallochaperone activity	molecular_function	molecular carrier activity	1	6861	1	15989	1	0.429107	0.862292
GO:0016618	hydroxypyruvate reductase activity	molecular_function	catalytic activity	2	6861	3	15989	0.666667	0.394367	0.862292
GO:0016621	cinnamoyl-CoA reductase activity	molecular_function	catalytic activity	4	6861	6	15989	0.666667	0.221791	0.862292
GO:0016631	enoyl-[acyl-carrier-protein] reductase activity	molecular_function	catalytic activity	2	6861	2	15989	1	0.184118	0.862292
GO:0016639	oxidoreductase activity, acting on the CH-NH2 group of donors, NAD or NADP as acceptor	molecular_function	catalytic activity	2	6861	2	15989	1	0.184118	0.862292
GO:0016653	oxidoreductase activity, acting on NAD(P)H, heme protein as acceptor	molecular_function	catalytic activity	1	6861	1	15989	1	0.429107	0.862292
GO:0016682	oxidoreductase activity, acting on diphenols and related substances as donors, oxygen as acceptor	molecular_function	catalytic activity	6	6861	10	15989	0.6	0.218895	0.862292
GO:0016701	oxidoreductase activity, acting on single donors with incorporation of molecular oxygen	molecular_function	catalytic activity	1	6861	1	15989	1	0.429107	0.862292
GO:0016702	oxidoreductase activity, acting on single donors with incorporation of molecular oxygen, incorporation of two atoms of oxygen	molecular_function	catalytic activity	12	6861	22	15989	0.545455	0.186927	0.862292
GO:0016719	carotene 7,8-desaturase activity	molecular_function	catalytic activity	1	6861	1	15989	1	0.429107	0.862292
GO:0016758	transferase activity, transferring hexosyl groups	molecular_function	catalytic activity	28	6861	55	15989	0.509091	0.143781	0.862292
GO:0016760	cellulose synthase (UDP-forming) activity	molecular_function	catalytic activity	14	6861	28	15989	0.5	0.283487	0.862292
GO:0016762	xyloglucan:xyloglucosyl transferase activity	molecular_function	catalytic activity	19	6861	37	15989	0.513514	0.191139	0.862292
GO:0016763	transferase activity, transferring pentosyl groups	molecular_function	catalytic activity	1	6861	1	15989	1	0.429107	0.862292
GO:0016768	spermine synthase activity	molecular_function	catalytic activity	2	6861	3	15989	0.666667	0.394367	0.862292
GO:0016776	phosphotransferase activity, phosphate group as acceptor	molecular_function	catalytic activity	1	6861	1	15989	1	0.429107	0.862292
GO:0016787	hydrolase activity	molecular_function	catalytic activity	133	6861	287	15989	0.463415	0.130476	0.862292
GO:0016791	phosphatase activity	molecular_function	catalytic activity	17	6861	36	15989	0.472222	0.359064	0.862292
GO:0016810	hydrolase activity, acting on carbon-nitrogen (but not peptide) bonds	molecular_function	catalytic activity	2	6861	3	15989	0.666667	0.394367	0.862292
GO:0016813	hydrolase activity, acting on carbon-nitrogen (but not peptide) bonds, in linear amidines	molecular_function	catalytic activity	2	6861	2	15989	1	0.184118	0.862292
GO:0016829	lyase activity	molecular_function	catalytic activity	47	6861	96	15989	0.489583	0.136405	0.862292
GO:0016830	carbon-carbon lyase activity	molecular_function	catalytic activity	2	6861	2	15989	1	0.184118	0.862292
GO:0016833	oxo-acid-lyase activity	molecular_function	catalytic activity	1	6861	1	15989	1	0.429107	0.862292
GO:0016843	amine-lyase activity	molecular_function	catalytic activity	1	6861	1	15989	1	0.429107	0.862292
GO:0016846	carbon-sulfur lyase activity	molecular_function	catalytic activity	5	6861	8	15989	0.625	0.221896	0.862292
GO:0016853	isomerase activity	molecular_function	catalytic activity	16	6861	33	15989	0.484848	0.316625	0.862292
GO:0016866	intramolecular transferase activity	molecular_function	catalytic activity	4	6861	6	15989	0.666667	0.221791	0.862292
GO:0016874	ligase activity	molecular_function	catalytic activity	27	6861	58	15989	0.465517	0.332512	0.862292
GO:0016879	ligase activity, forming carbon-nitrogen bonds	molecular_function	catalytic activity	1	6861	1	15989	1	0.429107	0.862292
GO:0016881	acid-amino acid ligase activity	molecular_function	catalytic activity	1	6861	1	15989	1	0.429107	0.862292
GO:0016920	pyroglutamyl-peptidase activity	molecular_function	catalytic activity	1	6861	1	15989	1	0.429107	0.862292
GO:0016972	thiol oxidase activity	molecular_function	catalytic activity	1	6861	1	15989	1	0.429107	0.862292
GO:0016985	mannan endo-1,4-beta-mannosidase activity	molecular_function	catalytic activity	7	6861	12	15989	0.583333	0.214431	0.862292
GO:0016987	sigma factor activity	molecular_function	transcription regulator activity	5	6861	7	15989	0.714286	0.127153	0.862292
GO:0017076	purine nucleotide binding	molecular_function	binding	1	6861	1	15989	1	0.429107	0.862292
GO:0017096	acetylserotonin O-methyltransferase activity	molecular_function	catalytic activity	2	6861	2	15989	1	0.184118	0.862292
GO:0017171	serine hydrolase activity	molecular_function	catalytic activity	1	6861	1	15989	1	0.429107	0.862292
GO:0018458	isopiperitenol dehydrogenase activity	molecular_function	catalytic activity	2	6861	2	15989	1	0.184118	0.862292
GO:0018459	carveol dehydrogenase activity	molecular_function	catalytic activity	2	6861	2	15989	1	0.184118	0.862292
GO:0018580	nitronate monooxygenase activity	molecular_function	catalytic activity	1	6861	1	15989	1	0.429107	0.862292
GO:0018685	alkane 1-monooxygenase activity	molecular_function	catalytic activity	3	6861	4	15989	0.75	0.214309	0.862292
GO:0018812	3-hydroxyacyl-CoA dehydratase activity	molecular_function	catalytic activity	4	6861	6	15989	0.666667	0.221791	0.862292
GO:0018826	methionine gamma-lyase activity	molecular_function	catalytic activity	2	6861	2	15989	1	0.184118	0.862292
GO:0019133	choline monooxygenase activity	molecular_function	catalytic activity	2	6861	2	15989	1	0.184118	0.862292
GO:0019139	cytokinin dehydrogenase activity	molecular_function	catalytic activity	5	6861	8	15989	0.625	0.221896	0.862292
GO:0019156	isoamylase activity	molecular_function	catalytic activity	2	6861	3	15989	0.666667	0.394367	0.862292
GO:0019207	kinase regulator activity	molecular_function	molecular function regulator	1	6861	1	15989	1	0.429107	0.862292
GO:0019237	centromeric DNA binding	molecular_function	binding	1	6861	1	15989	1	0.429107	0.862292
GO:0019776	Atg8 ligase activity	molecular_function	catalytic activity	1	6861	1	15989	1	0.429107	0.862292
GO:0019828	aspartic-type endopeptidase inhibitor activity	molecular_function	molecular function regulator	1	6861	1	15989	1	0.429107	0.862292
GO:0019894	kinesin binding	molecular_function	binding	1	6861	1	15989	1	0.429107	0.862292
GO:0019904	protein domain specific binding	molecular_function	binding	20	6861	41	15989	0.487805	0.272136	0.862292
GO:0019948	SUMO activating enzyme activity	molecular_function	catalytic activity	2	6861	2	15989	1	0.184118	0.862292
GO:0020037	heme binding	molecular_function	binding	200	6861	448	15989	0.446429	0.240735	0.862292
GO:0022857	transmembrane transporter activity	molecular_function	transporter activity	78	6861	174	15989	0.448276	0.330194	0.862292
GO:0030247	polysaccharide binding	molecular_function	binding	23	6861	45	15989	0.511111	0.167867	0.862292
GO:0030295	protein kinase activator activity	molecular_function	molecular function regulator	5	6861	8	15989	0.625	0.221896	0.862292
GO:0030337	DNA polymerase processivity factor activity	molecular_function	molecular function regulator	1	6861	1	15989	1	0.429107	0.862292
GO:0030385	ferredoxin:thioredoxin reductase activity	molecular_function	catalytic activity	1	6861	1	15989	1	0.429107	0.862292
GO:0030410	nicotianamine synthase activity	molecular_function	catalytic activity	1	6861	1	15989	1	0.429107	0.862292
GO:0030515	snoRNA binding	molecular_function	binding	7	6861	11	15989	0.636364	0.139379	0.862292
GO:0030552	cAMP binding	molecular_function	binding	7	6861	13	15989	0.538462	0.300142	0.862292
GO:0030553	cGMP binding	molecular_function	binding	7	6861	13	15989	0.538462	0.300142	0.862292
GO:0030598	rRNA N-glycosylase activity	molecular_function	catalytic activity	2	6861	2	15989	1	0.184118	0.862292
GO:0030604	1-deoxy-D-xylulose-5-phosphate reductoisomerase activity	molecular_function	catalytic activity	1	6861	1	15989	1	0.429107	0.862292
GO:0030621	U4 snRNA binding	molecular_function	binding	1	6861	1	15989	1	0.429107	0.862292
GO:0030735	carnosine N-methyltransferase activity	molecular_function	catalytic activity	1	6861	1	15989	1	0.429107	0.862292
GO:0030797	24-methylenesterol C-methyltransferase activity	molecular_function	catalytic activity	2	6861	3	15989	0.666667	0.394367	0.862292
GO:0030983	mismatched DNA binding	molecular_function	binding	7	6861	13	15989	0.538462	0.300142	0.862292
GO:0031369	translation initiation factor binding	molecular_function	binding	5	6861	9	15989	0.555556	0.33009	0.862292
GO:0031386	protein tag	molecular_function	protein tag	6	6861	12	15989	0.5	0.414198	0.862292
GO:0031409	pigment binding	molecular_function	binding	1	6861	1	15989	1	0.429107	0.862292
GO:0031435	mitogen-activated protein kinase kinase kinase binding	molecular_function	binding	1	6861	1	15989	1	0.429107	0.862292
GO:0031543	peptidyl-proline dioxygenase activity	molecular_function	catalytic activity	3	6861	4	15989	0.75	0.214309	0.862292
GO:0031625	ubiquitin protein ligase binding	molecular_function	binding	26	6861	56	15989	0.464286	0.343676	0.862292
GO:0031956	medium-chain fatty acid-CoA ligase activity	molecular_function	catalytic activity	1	6861	1	15989	1	0.429107	0.862292
GO:0031957	very long-chain fatty acid-CoA ligase activity	molecular_function	catalytic activity	2	6861	2	15989	1	0.184118	0.862292
GO:0032542	sulfiredoxin activity	molecular_function	antioxidant activity	1	6861	1	15989	1	0.429107	0.862292
GO:0033699	DNA 5'-adenosine monophosphate hydrolase activity	molecular_function	catalytic activity	1	6861	1	15989	1	0.429107	0.862292
GO:0033729	anthocyanidin reductase activity	molecular_function	catalytic activity	1	6861	1	15989	1	0.429107	0.862292
GO:0033743	peptide-methionine (R)-S-oxide reductase activity	molecular_function	catalytic activity	3	6861	4	15989	0.75	0.214309	0.862292
GO:0033834	kaempferol 3-O-galactosyltransferase activity	molecular_function	catalytic activity	1	6861	1	15989	1	0.429107	0.862292
GO:0033853	aspartate-prephenate aminotransferase activity	molecular_function	catalytic activity	1	6861	1	15989	1	0.429107	0.862292
GO:0033854	glutamate-prephenate aminotransferase activity	molecular_function	catalytic activity	1	6861	1	15989	1	0.429107	0.862292
GO:0033907	beta-D-fucosidase activity	molecular_function	catalytic activity	1	6861	1	15989	1	0.429107	0.862292
GO:0033946	xyloglucan-specific endo-beta-1,4-glucanase activity	molecular_function	catalytic activity	1	6861	1	15989	1	0.429107	0.862292
GO:0034020	neoxanthin synthase activity	molecular_function	catalytic activity	1	6861	1	15989	1	0.429107	0.862292
GO:0034039	8-oxo-7,8-dihydroguanine DNA N-glycosylase activity	molecular_function	catalytic activity	2	6861	2	15989	1	0.184118	0.862292
GO:0034046	poly(G) binding	molecular_function	binding	1	6861	1	15989	1	0.429107	0.862292
GO:0034319	alcohol O-butanoyltransferase activity	molecular_function	catalytic activity	1	6861	1	15989	1	0.429107	0.862292
GO:0034336	misfolded RNA binding	molecular_function	binding	2	6861	2	15989	1	0.184118	0.862292
GO:0034338	short-chain carboxylesterase activity	molecular_function	catalytic activity	1	6861	1	15989	1	0.429107	0.862292
GO:0034595	phosphatidylinositol phosphate 5-phosphatase activity	molecular_function	catalytic activity	2	6861	3	15989	0.666667	0.394367	0.862292
GO:0034618	arginine binding	molecular_function	binding	1	6861	1	15989	1	0.429107	0.862292
GO:0034736	cholesterol O-acyltransferase activity	molecular_function	catalytic activity	1	6861	1	15989	1	0.429107	0.862292
GO:0035174	histone serine kinase activity	molecular_function	catalytic activity	2	6861	2	15989	1	0.184118	0.862292
GO:0035197	siRNA binding	molecular_function	binding	1	6861	1	15989	1	0.429107	0.862292
GO:0035241	protein-arginine omega-N monomethyltransferase activity	molecular_function	catalytic activity	3	6861	4	15989	0.75	0.214309	0.862292
GO:0035312	5'-3' exodeoxyribonuclease activity	molecular_function	catalytic activity	3	6861	5	15989	0.6	0.368831	0.862292
GO:0035402	histone kinase activity (H3-T11 specific)	molecular_function	catalytic activity	1	6861	1	15989	1	0.429107	0.862292
GO:0035485	adenine/guanine mispair binding	molecular_function	binding	1	6861	1	15989	1	0.429107	0.862292
GO:0035885	exochitinase activity	molecular_function	catalytic activity	1	6861	1	15989	1	0.429107	0.862292
GO:0036033	mediator complex binding	molecular_function	binding	1	6861	1	15989	1	0.429107	0.862292
GO:0036094	small molecule binding	molecular_function	binding	1	6861	1	15989	1	0.429107	0.862292
GO:0036310	annealing helicase activity	molecular_function	binding	2	6861	3	15989	0.666667	0.394367	0.862292
GO:0036361	racemase activity, acting on amino acids and derivatives	molecular_function	catalytic activity	1	6861	1	15989	1	0.429107	0.862292
GO:0042030	ATPase inhibitor activity	molecular_function	molecular function regulator	1	6861	1	15989	1	0.429107	0.862292
GO:0042277	peptide binding	molecular_function	binding	4	6861	5	15989	0.8	0.111293	0.862292
GO:0042282	hydroxymethylglutaryl-CoA reductase activity	molecular_function	catalytic activity	1	6861	1	15989	1	0.429107	0.862292
GO:0042283	dolichyl pyrophosphate Glc1Man9GlcNAc2 alpha-1,3-glucosyltransferase activity	molecular_function	catalytic activity	1	6861	1	15989	1	0.429107	0.862292
GO:0042286	glutamate-1-semialdehyde 2,1-aminomutase activity	molecular_function	catalytic activity	1	6861	1	15989	1	0.429107	0.862292
GO:0042299	lupeol synthase activity	molecular_function	catalytic activity	1	6861	1	15989	1	0.429107	0.862292
GO:0042300	beta-amyrin synthase activity	molecular_function	catalytic activity	2	6861	2	15989	1	0.184118	0.862292
GO:0042578	phosphoric ester hydrolase activity	molecular_function	catalytic activity	4	6861	5	15989	0.8	0.111293	0.862292
GO:0042834	peptidoglycan binding	molecular_function	binding	2	6861	2	15989	1	0.184118	0.862292
GO:0042900	arabinose transmembrane transporter activity	molecular_function	transporter activity	1	6861	1	15989	1	0.429107	0.862292
GO:0042903	tubulin deacetylase activity	molecular_function	catalytic activity	1	6861	1	15989	1	0.429107	0.862292
GO:0043014	alpha-tubulin binding	molecular_function	binding	1	6861	1	15989	1	0.429107	0.862292
GO:0043022	ribosome binding	molecular_function	binding	14	6861	30	15989	0.466667	0.405504	0.862292
GO:0043136	glycerol-3-phosphatase activity	molecular_function	catalytic activity	1	6861	1	15989	1	0.429107	0.862292
GO:0043142	single-stranded DNA-dependent ATPase activity	molecular_function	catalytic activity	2	6861	2	15989	1	0.184118	0.862292
GO:0043325	phosphatidylinositol-3,4-bisphosphate binding	molecular_function	binding	1	6861	1	15989	1	0.429107	0.862292
GO:0043546	molybdopterin cofactor binding	molecular_function	binding	2	6861	2	15989	1	0.184118	0.862292
GO:0043754	dihydrolipoyllysine-residue (2-methylpropanoyl)transferase activity	molecular_function	catalytic activity	1	6861	1	15989	1	0.429107	0.862292
GO:0043764	UDP-3-O-[3-hydroxymyristoyl] glucosamine N-acyltransferase activity	molecular_function	catalytic activity	1	6861	1	15989	1	0.429107	0.862292
GO:0043765	T/G mismatch-specific endonuclease activity	molecular_function	catalytic activity	2	6861	2	15989	1	0.184118	0.862292
GO:0043864	indoleacetamide hydrolase activity	molecular_function	catalytic activity	3	6861	4	15989	0.75	0.214309	0.862292
GO:0043879	glycolate transmembrane transporter activity	molecular_function	transporter activity	2	6861	2	15989	1	0.184118	0.862292
GO:0044022	histone kinase activity (H3-S28 specific)	molecular_function	catalytic activity	1	6861	1	15989	1	0.429107	0.862292
GO:0044212	transcription regulatory region DNA binding	molecular_function	binding	129	6861	282	15989	0.457447	0.181451	0.862292
GO:0044547	DNA topoisomerase binding	molecular_function	binding	1	6861	1	15989	1	0.429107	0.862292
GO:0044877	protein-containing complex binding	molecular_function	binding	9	6861	17	15989	0.529412	0.275394	0.862292
GO:0045156	electron transporter, transferring electrons within the cyclic electron transport pathway of photosynthesis activity	molecular_function	catalytic activity	3	6861	5	15989	0.6	0.368831	0.862292
GO:0045158	electron transporter, transferring electrons within cytochrome b6/f complex of photosystem II activity	molecular_function	catalytic activity	1	6861	1	15989	1	0.429107	0.862292
GO:0045182	translation regulator activity	molecular_function	translation regulator activity	1	6861	1	15989	1	0.429107	0.862292
GO:0045300	acyl-[acyl-carrier-protein] desaturase activity	molecular_function	catalytic activity	4	6861	6	15989	0.666667	0.221791	0.862292
GO:0045430	chalcone isomerase activity	molecular_function	catalytic activity	2	6861	3	15989	0.666667	0.394367	0.862292
GO:0045435	lycopene epsilon cyclase activity	molecular_function	catalytic activity	1	6861	1	15989	1	0.429107	0.862292
GO:0045436	lycopene beta cyclase activity	molecular_function	catalytic activity	2	6861	2	15989	1	0.184118	0.862292
GO:0045486	naringenin 3-dioxygenase activity	molecular_function	catalytic activity	2	6861	3	15989	0.666667	0.394367	0.862292
GO:0045547	dehydrodolichyl diphosphate synthase activity	molecular_function	catalytic activity	3	6861	5	15989	0.6	0.368831	0.862292
GO:0045552	dihydrokaempferol 4-reductase activity	molecular_function	catalytic activity	1	6861	1	15989	1	0.429107	0.862292
GO:0046030	inositol trisphosphate phosphatase activity	molecular_function	catalytic activity	1	6861	1	15989	1	0.429107	0.862292
GO:0046316	gluconokinase activity	molecular_function	catalytic activity	1	6861	1	15989	1	0.429107	0.862292
GO:0046404	ATP-dependent polydeoxyribonucleotide 5'-hydroxyl-kinase activity	molecular_function	catalytic activity	1	6861	1	15989	1	0.429107	0.862292
GO:0046422	violaxanthin de-epoxidase activity	molecular_function	catalytic activity	1	6861	1	15989	1	0.429107	0.862292
GO:0046429	4-hydroxy-3-methylbut-2-en-1-yl diphosphate synthase activity	molecular_function	catalytic activity	1	6861	1	15989	1	0.429107	0.862292
GO:0046481	digalactosyldiacylglycerol synthase activity	molecular_function	catalytic activity	3	6861	4	15989	0.75	0.214309	0.862292
GO:0046554	malate dehydrogenase (NADP+) activity	molecular_function	catalytic activity	2	6861	2	15989	1	0.184118	0.862292
GO:0046556	alpha-L-arabinofuranosidase activity	molecular_function	catalytic activity	8	6861	13	15989	0.615385	0.140964	0.862292
GO:0046566	DOPA dioxygenase activity	molecular_function	catalytic activity	1	6861	1	15989	1	0.429107	0.862292
GO:0046608	carotenoid isomerase activity	molecular_function	catalytic activity	1	6861	1	15989	1	0.429107	0.862292
GO:0046820	4-amino-4-deoxychorismate synthase activity	molecular_function	catalytic activity	1	6861	1	15989	1	0.429107	0.862292
GO:0046863	ribulose-1,5-bisphosphate carboxylase/oxygenase activator activity	molecular_function	molecular function regulator	1	6861	1	15989	1	0.429107	0.862292
GO:0046873	metal ion transmembrane transporter activity	molecular_function	transporter activity	4	6861	7	15989	0.571429	0.347975	0.862292
GO:0046914	transition metal ion binding	molecular_function	binding	4	6861	5	15989	0.8	0.111293	0.862292
GO:0046915	transition metal ion transmembrane transporter activity	molecular_function	transporter activity	1	6861	1	15989	1	0.429107	0.862292
GO:0046923	ER retention sequence binding	molecular_function	binding	2	6861	3	15989	0.666667	0.394367	0.862292
GO:0046974	histone methyltransferase activity (H3-K9 specific)	molecular_function	catalytic activity	1	6861	1	15989	1	0.429107	0.862292
GO:0046976	histone methyltransferase activity (H3-K27 specific)	molecular_function	catalytic activity	1	6861	1	15989	1	0.429107	0.862292
GO:0047012	sterol-4-alpha-carboxylate 3-dehydrogenase (decarboxylating) activity	molecular_function	catalytic activity	3	6861	4	15989	0.75	0.214309	0.862292
GO:0047066	phospholipid-hydroperoxide glutathione peroxidase activity	molecular_function	catalytic activity	2	6861	3	15989	0.666667	0.394367	0.862292
GO:0047100	glyceraldehyde-3-phosphate dehydrogenase (NADP+) (phosphorylating) activity	molecular_function	catalytic activity	2	6861	3	15989	0.666667	0.394367	0.862292
GO:0047130	saccharopine dehydrogenase (NADP+, L-lysine-forming) activity	molecular_function	catalytic activity	1	6861	1	15989	1	0.429107	0.862292
GO:0047131	saccharopine dehydrogenase (NAD+, L-glutamate-forming) activity	molecular_function	catalytic activity	1	6861	1	15989	1	0.429107	0.862292
GO:0047172	shikimate O-hydroxycinnamoyltransferase activity	molecular_function	catalytic activity	1	6861	1	15989	1	0.429107	0.862292
GO:0047184	1-acylglycerophosphocholine O-acyltransferase activity	molecular_function	catalytic activity	2	6861	3	15989	0.666667	0.394367	0.862292
GO:0047213	anthocyanidin 3-O-glucosyltransferase activity	molecular_function	catalytic activity	3	6861	4	15989	0.75	0.214309	0.862292
GO:0047262	polygalacturonate 4-alpha-galacturonosyltransferase activity	molecular_function	catalytic activity	15	6861	29	15989	0.517241	0.219242	0.862292
GO:0047274	galactinol-sucrose galactosyltransferase activity	molecular_function	catalytic activity	2	6861	3	15989	0.666667	0.394367	0.862292
GO:0047312	L-phenylalanine:pyruvate aminotransferase activity	molecular_function	catalytic activity	1	6861	1	15989	1	0.429107	0.862292
GO:0047334	diphosphate-fructose-6-phosphate 1-phosphotransferase activity	molecular_function	catalytic activity	3	6861	4	15989	0.75	0.214309	0.862292
GO:0047480	UDP-N-acetylmuramoyl-tripeptide-D-alanyl-D-alanine ligase activity	molecular_function	catalytic activity	1	6861	1	15989	1	0.429107	0.862292
GO:0047485	protein N-terminus binding	molecular_function	binding	1	6861	1	15989	1	0.429107	0.862292
GO:0047501	(+)-neomenthol dehydrogenase activity	molecular_function	catalytic activity	6	6861	11	15989	0.545455	0.314314	0.862292
GO:0047538	2-carboxy-D-arabinitol-1-phosphatase activity	molecular_function	catalytic activity	2	6861	2	15989	1	0.184118	0.862292
GO:0047632	agmatine deiminase activity	molecular_function	catalytic activity	1	6861	1	15989	1	0.429107	0.862292
GO:0047641	aldose-6-phosphate reductase (NADPH) activity	molecular_function	catalytic activity	1	6861	1	15989	1	0.429107	0.862292
GO:0047652	allantoate deiminase activity	molecular_function	catalytic activity	1	6861	1	15989	1	0.429107	0.862292
GO:0047668	amygdalin beta-glucosidase activity	molecular_function	catalytic activity	1	6861	1	15989	1	0.429107	0.862292
GO:0047701	beta-L-arabinosidase activity	molecular_function	catalytic activity	1	6861	1	15989	1	0.429107	0.862292
GO:0047734	CDP-glycerol diphosphatase activity	molecular_function	catalytic activity	1	6861	1	15989	1	0.429107	0.862292
GO:0047760	butyrate-CoA ligase activity	molecular_function	catalytic activity	3	6861	4	15989	0.75	0.214309	0.862292
GO:0047763	caffeate O-methyltransferase activity	molecular_function	catalytic activity	4	6861	6	15989	0.666667	0.221791	0.862292
GO:0047810	D-alanine:2-oxoglutarate aminotransferase activity	molecular_function	catalytic activity	1	6861	1	15989	1	0.429107	0.862292
GO:0047844	deoxycytidine deaminase activity	molecular_function	catalytic activity	1	6861	1	15989	1	0.429107	0.862292
GO:0047863	dimethylallylcistransferase activity	molecular_function	catalytic activity	1	6861	1	15989	1	0.429107	0.862292
GO:0047890	flavanone 4-reductase activity	molecular_function	catalytic activity	1	6861	1	15989	1	0.429107	0.862292
GO:0047893	flavonol 3-O-glucosyltransferase activity	molecular_function	catalytic activity	3	6861	5	15989	0.6	0.368831	0.862292
GO:0047894	flavonol 3-sulfotransferase activity	molecular_function	catalytic activity	1	6861	1	15989	1	0.429107	0.862292
GO:0047913	gallate 1-beta-glucosyltransferase activity	molecular_function	catalytic activity	1	6861	1	15989	1	0.429107	0.862292
GO:0047947	glutamine N-phenylacetyltransferase activity	molecular_function	catalytic activity	2	6861	2	15989	1	0.184118	0.862292
GO:0048018	receptor ligand activity	molecular_function	binding	2	6861	3	15989	0.666667	0.394367	0.862292
GO:0048027	mRNA 5'-UTR binding	molecular_function	binding	3	6861	4	15989	0.75	0.214309	0.862292
GO:0048032	galacturonate binding	molecular_function	binding	3	6861	4	15989	0.75	0.214309	0.862292
GO:0048244	phytanoyl-CoA dioxygenase activity	molecular_function	catalytic activity	1	6861	1	15989	1	0.429107	0.862292
GO:0048256	flap endonuclease activity	molecular_function	catalytic activity	4	6861	6	15989	0.666667	0.221791	0.862292
GO:0048257	3'-flap endonuclease activity	molecular_function	catalytic activity	1	6861	1	15989	1	0.429107	0.862292
GO:0048529	magnesium-protoporphyrin IX monomethyl ester (oxidative) cyclase activity	molecular_function	catalytic activity	1	6861	1	15989	1	0.429107	0.862292
GO:0050048	L-leucine:2-oxoglutarate aminotransferase activity	molecular_function	catalytic activity	1	6861	1	15989	1	0.429107	0.862292
GO:0050057	linamarin synthase activity	molecular_function	catalytic activity	1	6861	1	15989	1	0.429107	0.862292
GO:0050062	long-chain-fatty-acyl-CoA reductase activity	molecular_function	catalytic activity	2	6861	3	15989	0.666667	0.394367	0.862292
GO:0050080	malonyl-CoA decarboxylase activity	molecular_function	catalytic activity	1	6861	1	15989	1	0.429107	0.862292
GO:0050145	nucleoside monophosphate kinase activity	molecular_function	catalytic activity	1	6861	1	15989	1	0.429107	0.862292
GO:0050203	oxalate-CoA ligase activity	molecular_function	catalytic activity	2	6861	2	15989	1	0.184118	0.862292
GO:0050225	pseudouridine kinase activity	molecular_function	catalytic activity	1	6861	1	15989	1	0.429107	0.862292
GO:0050236	pyridoxine:NADP 4-dehydrogenase activity	molecular_function	catalytic activity	1	6861	1	15989	1	0.429107	0.862292
GO:0050242	pyruvate, phosphate dikinase activity	molecular_function	catalytic activity	1	6861	1	15989	1	0.429107	0.862292
GO:0050269	coniferyl-aldehyde dehydrogenase activity	molecular_function	catalytic activity	1	6861	1	15989	1	0.429107	0.862292
GO:0050281	serine-glyoxylate transaminase activity	molecular_function	catalytic activity	1	6861	1	15989	1	0.429107	0.862292
GO:0050290	sphingomyelin phosphodiesterase D activity	molecular_function	catalytic activity	1	6861	1	15989	1	0.429107	0.862292
GO:0050297	stizolobate synthase activity	molecular_function	catalytic activity	1	6861	1	15989	1	0.429107	0.862292
GO:0050302	indole-3-acetaldehyde oxidase activity	molecular_function	catalytic activity	1	6861	1	15989	1	0.429107	0.862292
GO:0050313	sulfur dioxygenase activity	molecular_function	catalytic activity	2	6861	2	15989	1	0.184118	0.862292
GO:0050342	tocopherol O-methyltransferase activity	molecular_function	catalytic activity	1	6861	1	15989	1	0.429107	0.862292
GO:0050373	UDP-arabinose 4-epimerase activity	molecular_function	catalytic activity	3	6861	5	15989	0.6	0.368831	0.862292
GO:0050377	UDP-glucose 4,6-dehydratase activity	molecular_function	catalytic activity	2	6861	3	15989	0.666667	0.394367	0.862292
GO:0050392	vicianin beta-glucosidase activity	molecular_function	catalytic activity	1	6861	1	15989	1	0.429107	0.862292
GO:0050408	[pyruvate kinase]-phosphatase activity	molecular_function	catalytic activity	1	6861	1	15989	1	0.429107	0.862292
GO:0050464	nitrate reductase (NADPH) activity	molecular_function	catalytic activity	1	6861	1	15989	1	0.429107	0.862292
GO:0050474	(S)-norcoclaurine synthase activity	molecular_function	catalytic activity	3	6861	4	15989	0.75	0.214309	0.862292
GO:0050505	hydroquinone glucosyltransferase activity	molecular_function	catalytic activity	2	6861	2	15989	1	0.184118	0.862292
GO:0050513	glycoprotein 2-beta-D-xylosyltransferase activity	molecular_function	catalytic activity	1	6861	1	15989	1	0.429107	0.862292
GO:0050521	alpha-glucan, water dikinase activity	molecular_function	catalytic activity	1	6861	1	15989	1	0.429107	0.862292
GO:0050567	glutaminyl-tRNA synthase (glutamine-hydrolyzing) activity	molecular_function	catalytic activity	3	6861	5	15989	0.6	0.368831	0.862292
[truncated: 974 more rows]
