# Supplementary material for: Transcriptome Analysis of Flower Development and Mining of Genes Related to Flowering Time in Tomato (Solanum lycopersicum)
Source: Int J Mol Sci. 2021 Jul 29;22(15):8128. doi: 10.3390/ijms22158128 (PMC8347202; doi:10.3390/ijms22158128)
Supplement: Supplementary file 1 [file ijms-22-08128-s001.zip › Table S3.xls]

## Sheet: Table S3A
Table S3A KEGG pathway enrichment results with upregulated DEGs from the MM_1-vs-MM_2 comparison.
KEGG Pathway Term ID	KEGG Pathway Term Desc	KEGG Pathway Term Level1	KEGG Pathway Term Level2	Term Candidate Gene Num	Total Candidate Gene Num	Term Gene Num	Total Gene Num	Rich Ratio	P value	Q value
195	Photosynthesis	Metabolism	Energy metabolism	35	969	53	6056	0.660377	2.81765e-16	9.35459e-14
1100	Metabolic pathways	Metabolism	Global and overview maps	425	969	2140	6056	0.198598	1.34937e-09	2.23995e-07
710	Carbon fixation in photosynthetic organisms	Metabolism	Energy metabolism	34	969	79	6056	0.43038	8.62482e-09	9.5448e-07
906	Carotenoid biosynthesis	Metabolism	Metabolism of terpenoids and polyketides	21	969	38	6056	0.552632	2.94693e-08	2.44595e-06
1200	Carbon metabolism	Metabolism	Global and overview maps	74	969	274	6056	0.270073	1.42388e-06	9.45457e-05
1110	Biosynthesis of secondary metabolites	Metabolism	Global and overview maps	251	969	1231	6056	0.203899	2.60451e-06	0.000144116
4626	Plant-pathogen interaction	Organismal Systems	Environmental adaptation	53	969	189	6056	0.280423	1.46478e-05	0.000442097
980	Metabolism of xenobiotics by cytochrome P450	Metabolism	Xenobiotics biodegradation and metabolism	27	969	75	6056	0.36	1.77019e-05	0.000489752
4075	Plant hormone signal transduction	Environmental Information Processing	Signal transduction	75	969	299	6056	0.250836	2.24217e-05	0.000572615
30	Pentose phosphate pathway	Metabolism	Carbohydrate metabolism	21	969	57	6056	0.368421	0.000102257	0.0019974
480	Glutathione metabolism	Metabolism	Metabolism of other amino acids	35	969	117	6056	0.299145	0.000102276	0.0019974
4016	MAPK signaling pathway - plant	Environmental Information Processing	Signal transduction	49	969	182	6056	0.269231	9.60051e-05	0.0019974
4712	Circadian rhythm - plant	Organismal Systems	Environmental adaptation	18	969	46	6056	0.391304	0.000129834	0.00239471
1120	Microbial metabolism in diverse environments	Metabolism	Global and overview maps	87	969	385	6056	0.225974	0.000295517	0.00490559
630	Glyoxylate and dicarboxylate metabolism	Metabolism	Carbohydrate metabolism	24	969	76	6056	0.315789	0.000513613	0.00775089
562	Inositol phosphate metabolism	Metabolism	Carbohydrate metabolism	23	969	75	6056	0.306667	0.00105085	0.0151688
860	Porphyrin and chlorophyll metabolism	Metabolism	Metabolism of cofactors and vitamins	17	969	50	6056	0.34	0.00132379	0.0169038
561	Glycerolipid metabolism	Metabolism	Lipid metabolism	25	969	86	6056	0.290698	0.00152548	0.0174641
40	Pentose and glucuronate interconversions	Metabolism	Carbohydrate metabolism	34	969	135	6056	0.251852	0.00365172	0.0404123
500	Starch and sucrose metabolism	Metabolism	Carbohydrate metabolism	34	969	146	6056	0.232877	0.0129311	0.122661

## Sheet: Table S3B
Table S3B KEGG pathway enrichment results with upregulated DEGs from the 20965_1-vs-20965_2 comparison.
KEGG Pathway Term ID	KEGG Pathway Term Desc	KEGG Pathway Term Level1	KEGG Pathway Term Level2	Term Candidate Gene Num	Total Candidate Gene Num	Term Gene Num	Total Gene Num	Rich Ratio	P value	Q value
4075	Plant hormone signal transduction	Environmental Information Processing	Signal transduction	119	1542	299	6056	0.397993	1.68117e-08	6.03539e-06
1100	Metabolic pathways	Metabolism	Global and overview maps	633	1542	2140	6056	0.295794	3.93559e-08	7.06438e-06
4626	Plant-pathogen interaction	Organismal Systems	Environmental adaptation	81	1542	189	6056	0.428571	9.08524e-08	1.0872e-05
4016	MAPK signaling pathway - plant	Environmental Information Processing	Signal transduction	78	1542	182	6056	0.428571	1.57961e-07	1.4177e-05
906	Carotenoid biosynthesis	Metabolism	Metabolism of terpenoids and polyketides	23	1542	38	6056	0.605263	4.78129e-06	0.000245212
1200	Carbon metabolism	Metabolism	Global and overview maps	101	1542	274	6056	0.368613	1.28308e-05	0.000524974
4070	Phosphatidylinositol signaling system	Environmental Information Processing	Signal transduction	36	1542	74	6056	0.486486	1.31609e-05	0.000524974
1120	Microbial metabolism in diverse environments	Metabolism	Global and overview maps	134	1542	385	6056	0.348052	1.56927e-05	0.000563368
561	Glycerolipid metabolism	Metabolism	Lipid metabolism	38	1542	86	6056	0.44186	0.000111808	0.003649
1110	Biosynthesis of secondary metabolites	Metabolism	Global and overview maps	362	1542	1231	6056	0.29407	0.000245693	0.00630027
562	Inositol phosphate metabolism	Metabolism	Carbohydrate metabolism	33	1542	75	6056	0.44	0.000341783	0.00650445
564	Glycerophospholipid metabolism	Metabolism	Lipid metabolism	43	1542	105	6056	0.409524	0.000329425	0.00650445
592	alpha-Linolenic acid metabolism	Metabolism	Lipid metabolism	25	1542	52	6056	0.480769	0.000344246	0.00650445
4144	Endocytosis	Cellular Processes	Transport and catabolism	69	1542	187	6056	0.368984	0.000292415	0.00650445
630	Glyoxylate and dicarboxylate metabolism	Metabolism	Carbohydrate metabolism	33	1542	76	6056	0.434211	0.000458846	0.00789272
710	Carbon fixation in photosynthetic organisms	Metabolism	Energy metabolism	34	1542	79	6056	0.43038	0.000461691	0.00789272
195	Photosynthesis	Metabolism	Energy metabolism	25	1542	53	6056	0.471698	0.000496128	0.00809591
680	Methane metabolism	Metabolism	Energy metabolism	27	1542	59	6056	0.457627	0.000547428	0.00854464
500	Starch and sucrose metabolism	Metabolism	Carbohydrate metabolism	55	1542	146	6056	0.376712	0.000659197	0.00986049
30	Pentose phosphate pathway	Metabolism	Carbohydrate metabolism	26	1542	57	6056	0.45614	0.000733397	0.0104341

## Sheet: Table S3C
Table S3C KEGG pathway enrichment results with upregulated DEGs from the MM_2-vs-20965_2 comparison.
KEGG Pathway Term ID	KEGG Pathway Term Desc	KEGG Pathway Term Level1	KEGG Pathway Term Level2	Term Candidate Gene Num	Total Candidate Gene Num	Term Gene Num	Total Gene Num	Rich Ratio	P value	Q value
1040	Biosynthesis of unsaturated fatty acids	Metabolism	Lipid metabolism	8	313	26	6056	0.307692	3.20922e-05	0.00393405
1100	Metabolic pathways	Metabolism	Global and overview maps	144	313	2140	6056	0.0672897	4.21505e-05	0.00393405
1110	Biosynthesis of secondary metabolites	Metabolism	Global and overview maps	93	313	1231	6056	0.0755483	3.24909e-05	0.00393405
270	Cysteine and methionine metabolism	Metabolism	Amino acid metabolism	13	313	113	6056	0.115044	0.0052526	0.210104
71	Fatty acid degradation	Metabolism	Lipid metabolism	8	313	60	6056	0.133333	0.0113829	0.22737
360	Phenylalanine metabolism	Metabolism	Amino acid metabolism	10	313	83	6056	0.120482	0.0099825	0.22737
520	Amino sugar and nucleotide sugar metabolism	Metabolism	Carbohydrate metabolism	14	313	134	6056	0.104478	0.00898587	0.22737
940	Phenylpropanoid biosynthesis	Metabolism	Biosynthesis of other secondary metabolites	20	313	222	6056	0.0900901	0.0103975	0.22737
1212	Fatty acid metabolism	Metabolism	Global and overview maps	10	313	81	6056	0.123457	0.00844113	0.22737
1230	Biosynthesis of amino acids	Metabolism	Global and overview maps	21	313	238	6056	0.0882353	0.0109722	0.22737
592	alpha-Linolenic acid metabolism	Metabolism	Lipid metabolism	7	313	52	6056	0.134615	0.0166344	0.291103
73	Cutin, suberine and wax biosynthesis	Metabolism	Lipid metabolism	5	313	33	6056	0.151515	0.0257536	0.407355
330	Arginine and proline metabolism	Metabolism	Amino acid metabolism	7	313	66	6056	0.106061	0.0527222	0.584545
350	Tyrosine metabolism	Metabolism	Amino acid metabolism	6	313	52	6056	0.115385	0.0501066	0.584545
591	Linoleic acid metabolism	Metabolism	Lipid metabolism	3	313	19	6056	0.157895	0.0717439	0.680723
626	Naphthalene degradation	Metabolism	Xenobiotics biodegradation and metabolism	2	313	9	6056	0.222222	0.0753657	0.680723
941	Flavonoid biosynthesis	Metabolism	Biosynthesis of other secondary metabolites	6	313	57	6056	0.105263	0.0723174	0.680723
945	Stilbenoid, diarylheptanoid and gingerol biosynthesis	Metabolism	Biosynthesis of other secondary metabolites	5	313	44	6056	0.113636	0.0747403	0.680723
4712	Circadian rhythm - plant	Organismal Systems	Environmental adaptation	5	313	46	6056	0.108696	0.086921	0.708403
904	Diterpenoid biosynthesis	Metabolism	Metabolism of terpenoids and polyketides	4	313	34	6056	0.117647	0.0961509	0.727629
