# Supplementary material for: Transcriptome Analysis of Flower Development and Mining of Genes Related to Flowering Time in Tomato (Solanum lycopersicum)
Source: Int J Mol Sci. 2021 Jul 29;22(15):8128. doi: 10.3390/ijms22158128 (PMC8347202; doi:10.3390/ijms22158128)
Supplement: Supplementary file 1 [file ijms-22-08128-s001.zip › Table S4.xls]

## Sheet: 1616674945652_3b4afc167001
Table S4 Information about all candidate genes.
Gene ID	Gene Symbol	Type	MM_1 Expression	MM_2 Expression	20965_1 Expression	20965_2 Expression	log2 (MM_2 / MM_1)	log2 (20965_2 / 20965_1)	Pvalue(MM_2 / MM_1)	Pvalue(20965_2 / 20965_1)	Qvalue (MM_2 / MM_1)	Qvalue (20965_2 / 20965_1)	KEGG Pathway Desc	GO_C Desc	GO_F Desc	GO_P Desc	GeneBank Desc
543547	COP1	mRNA	5.16667	5.94333	4.66	9.03	0.302939	1.15031	0.419485	2.36477e-09	0.595574	1.50991e-08	04115///p53 signaling pathway+++04120///Ubiquitin mediated proteolysis+++04712///Circadian rhythm - plant	GO:0005634///nucleus+++GO:0016604///nuclear body	GO:0004842///ubiquitin-protein transferase activity+++GO:0042802///identical protein binding+++GO:0061630///ubiquitin protein ligase activity	GO:0006281///DNA repair+++GO:0009640///photomorphogenesis+++GO:0009641///shade avoidance+++GO:0009649///entrainment of circadian clock+++GO:0010119///regulation of stomatal movement+++GO:0016567///protein ubiquitination+++GO:0046283///anthocyanin-containing compound metabolic process+++GO:0048573///photoperiodism, flowering	COP1 homolog
101259391	LOC101259391	mRNA	0.89	5.17	1.78333	20.3033	2.57697	3.73783	1.6867e-16	1.70026e-06	8.57751e-15	7.15434e-06	04115///p53 signaling pathway+++04120///Ubiquitin mediated proteolysis+++04712///Circadian rhythm - plant	GO:0005634///nucleus+++GO:0005829///cytosol+++GO:0080008///Cul4-RING E3 ubiquitin ligase complex		GO:0009658///chloroplast organization+++GO:0009908///flower development+++GO:0010224///response to UV-B+++GO:0043496///regulation of protein homodimerization activity	COP1-like protein
101263075	LOC101263075	mRNA	17.9367	24.3133	8.20333	24.52	0.525749	1.7801	0.0964294	4.82488e-16	0.195548	6.72985e-15		GO:0005634///nucleus+++GO:0005886///plasma membrane		GO:0009416///response to light stimulus+++GO:0009718///anthocyanin-containing compound biosynthetic process+++GO:0015995///chlorophyll biosynthetic process+++GO:0045893///positive regulation of transcription, DNA-templated	COP1-interacting protein 7
543596	CRY2	mRNA	11.0433	20.47	6.70333	15.9867	1.00739	1.4073	0.00424438	3.34472e-13	0.0146836	3.44443e-12	04712///Circadian rhythm - plant		GO:0009882///blue light photoreceptor activity		cryptochrome 2
778253	CO1	mRNA	0.506667	0.97	0.556667	33.79	1.01612	6.15719	0.124023	3.41172e-06	0.238739	1.36965e-05		GO:0005634///nucleus	GO:0008270///zinc ion binding	GO:0009909///regulation of flower development	CONSTANS 1
100191137	LOC100191137	mRNA	21.0367	55.5167	35.78	157.043	1.41944	2.35036	4.01415e-06	7.78627e-07	3.10571e-05	3.45131e-06		GO:0005634///nucleus	GO:0008270///zinc ion binding	GO:0009909///regulation of flower development	CONSTANS-like protein
101245415	CO3	mRNA	0.813333	1.81667	0.41	1.20667	1.29389	1.72737	0.0719396	0.0210472	0.155112	0.0398153		GO:0005634///nucleus	GO:0008270///zinc ion binding		CONSTANS 3
100134891	EZ1	mRNA	8.21667	11.4333	4.75333	9.21	0.587421	1.15017	0.144972	2.91893e-06	0.269943	1.18659e-05	00310///Lysine degradation+++05206///MicroRNAs in cancer	GO:0005634///nucleus+++GO:0005677///chromatin silencing complex+++GO:0009506///plasmodesma+++GO:0031519///PcG protein complex	GO:0003727///single-stranded RNA binding+++GO:0008168///methyltransferase activity+++GO:0016740///transferase activity+++GO:0018024///histone-lysine N-methyltransferase activity	GO:0006342///chromatin silencing+++GO:0006349///regulation of gene expression by genetic imprinting+++GO:0009737///response to abscisic acid+++GO:0032259///methylation+++GO:0048587///regulation of short-day photoperiodism, flowering+++GO:0070734///histone H3-K27 methylation+++GO:1900055///regulation of leaf senescence	histone-lysine N-methyltransferase EZ1
101245336	LOC101245336	mRNA	4.74	18.11	3.77333	15.7167	1.95385	2.2636	3.39159e-17	3.44782e-10	1.92322e-15	2.45234e-09		GO:0005886///plasma membrane+++GO:0016021///integral component of membrane		GO:0009901///anther dehiscence+++GO:0010930///negative regulation of auxin mediated signaling pathway	FT-interacting protein 1
109119816	LOC109119816	mRNA	0.153333	0.876667	0.0166667	0.696667	2.71786	5.2916	0.0474192	0.0010264	0.110478	0.00264666		GO:0005576///extracellular region+++GO:0009505///plant-type cell wall		GO:0009791///post-embryonic development+++GO:0010030///positive regulation of seed germination+++GO:2000028///regulation of photoperiodism, flowering	protein PELPK1-like
101256688	LOC101256688	mRNA	29.3133	47.9233	30.4933	58.3833	0.749112	1.12892	0.000136158	4.95073e-05	0.00071806	0.000165383		GO:0005634///nucleus	GO:0042803///protein homodimerization activity	GO:0009649///entrainment of circadian clock+++GO:0042753///positive regulation of circadian rhythm+++GO:0048511///rhythmic process	protein ELF4-LIKE 3
101265040	LOC101265040	mRNA	3.48667	5.16667	2.58333	6.37667	0.672883	1.4651	0.033544878	0.000349409	0.083394423	0.000993237	04712///Circadian rhythm - plant			GO:2000028///regulation of photoperiodism, flowering	ELF3-like protein 2
101265430	LOC101265430	mRNA	11.5133	26.0367	7.58333	15.31	1.22803	1.18462	0.000331419	0.00250313	0.00157815	0.00592794				GO:0006952///defense response+++GO:0009607///response to biotic stimulus	protein early flowering 2-like
101268174	LOC101268174	mRNA	5.37333	10.2	4.29	6.72333	1.02756	0.828041	0.00682605	0.00210235	0.022053	0.00506682	04712///Circadian rhythm - plant				protein EARLY FLOWERING 3
101252363	LOC101252363	mRNA	0.266667	2.07667	0.176667	2.82333	3.02667	4.2302	4.01375e-05	8.52093e-07	0.000243967	3.75876e-06		GO:0005634///nucleus	GO:0003677///DNA binding+++GO:0003700///DNA-binding transcription factor activity+++GO:0043565///sequence-specific DNA binding+++GO:0046983///protein dimerization activity	GO:0006351///transcription, DNA-templated+++GO:0009637///response to blue light+++GO:0009908///flower development+++GO:0009911///positive regulation of flower development	transcription factor BEE 2
101252729	LOC101252729	mRNA	9.24667	33.82	3.26333	46.3567	2.05584	4.053	0.000134552	1.5324e-22	0.000711064	3.69048e-21		GO:0005634///nucleus	GO:0003677///DNA binding+++GO:0003700///DNA-binding transcription factor activity+++GO:0043565///sequence-specific DNA binding+++GO:0046983///protein dimerization activity	GO:0006351///transcription, DNA-templated+++GO:0009637///response to blue light+++GO:0009908///flower development+++GO:0009911///positive regulation of flower development	transcription factor bHLH63
101265165	LOC101265165	mRNA	2.94	13.6167	2.99667	12.9333	2.30256	2.32483	5.09672e-11	7.81089e-09	1.06826e-09	4.65503e-08		GO:0005634///nucleus	GO:0001228///DNA-binding transcription activator activity, RNA polymerase II-specific+++GO:0003677///DNA binding+++GO:0003700///DNA-binding transcription factor activity+++GO:0046983///protein dimerization activity	GO:0006355///regulation of transcription, DNA-templated+++GO:0048573///photoperiodism, flowering	transcription factor bHLH130
101255722	LOC101255722	mRNA	1.60667	8.3	0.46	8.88	2.55254	4.49359	0.000106547	2.2456e-16	0.000577724	3.22654e-15		GO:0005737///cytoplasm	GO:0004672///protein kinase activity+++GO:0004674///protein serine/threonine kinase activity+++GO:0005524///ATP binding+++GO:0043424///protein histidine kinase binding	GO:0006468///protein phosphorylation+++GO:0035556///intracellular signal transduction+++GO:0048573///photoperiodism, flowering	probable serine/threonine-protein kinase WNK5
101258346	LOC101258346	mRNA	37.0833	89.16	31.2867	37.62	1.33863	0.419673	3.78631e-15	0.38515	1.56008e-13	0.485769	04712///Circadian rhythm - plant	GO:0005634///nucleus		GO:0009908///flower development+++GO:0030154///cell differentiation+++GO:0042752///regulation of circadian rhythm+++GO:0048511///rhythmic process+++GO:0048586///regulation of long-day photoperiodism, flowering	protein GIGANTEA-like
101244491	LOC101244491	mRNA	1.88667	4.41667	0.896667	6.46333	1.25604	3.29152	0.135173	2.13107e-12	0.255481	1.99379e-11		GO:0005634///nucleus	GO:0000977///RNA polymerase II regulatory region sequence-specific DNA binding+++GO:0003700///DNA-binding transcription factor activity+++GO:0008134///transcription factor binding+++GO:0043565///sequence-specific DNA binding+++GO:0044212///transcription regulatory region DNA binding+++GO:0046983///protein dimerization activity	GO:0007275///multicellular organism development+++GO:0009838///abscission+++GO:0009909///regulation of flower development+++GO:0010048///vernalization response+++GO:0010150///leaf senescence+++GO:0030154///cell differentiation+++GO:0045944///positive regulation of transcription by RNA polymerase II+++GO:0080187///floral organ senescence	MADS-box protein AGL42-like
101249083	LOC101249083	mRNA	0	2.68333	0	2.00333	8.63477	8.30566	4.813e-08	0.0335864	5.67947e-07	0.0601666	04013///MAPK signaling pathway - fly+++04022///cGMP-PKG signaling pathway+++04371///Apelin signaling pathway+++04928///Parathyroid hormone synthesis, secretion and action+++05418///Fluid shear stress and atherosclerosis	GO:0005634///nucleus	GO:0000977///RNA polymerase II regulatory region sequence-specific DNA binding+++GO:0003700///DNA-binding transcription factor activity+++GO:0008134///transcription factor binding+++GO:0043565///sequence-specific DNA binding+++GO:0044212///transcription regulatory region DNA binding+++GO:0046983///protein dimerization activity	GO:0007275///multicellular organism development+++GO:0009555///pollen development+++GO:0009909///regulation of flower development+++GO:0010048///vernalization response+++GO:0010152///pollen maturation+++GO:0045944///positive regulation of transcription by RNA polymerase II+++GO:0080092///regulation of pollen tube growth	agamous-like MADS-box protein AGL104
543553	GA20ox1	mRNA	2.94	5.92667	8.59333	10.36	1.11135	0.486272	0.16284	0.361074	0.296216	0.460398	00904///Diterpenoid biosynthesis+++01100///Metabolic pathways+++01110///Biosynthesis of secondary metabolites		GO:0016491///oxidoreductase activity+++GO:0045544///gibberellin 20-oxidase activity+++GO:0046872///metal ion binding+++GO:0051213///dioxygenase activity	GO:0009686///gibberellin biosynthetic process+++GO:0009826///unidimensional cell growth+++GO:0009908///flower development+++GO:0055114///oxidation-reduction process	gibberellin 20-oxidase-1
544211	20ox-2	mRNA	3.59	9.59667	4.38	11.0767	1.51692	1.53712	0.00681863	6.19528e-05	0.0220371	0.000203602	00904///Diterpenoid biosynthesis+++01100///Metabolic pathways+++01110///Biosynthesis of secondary metabolites		GO:0045544///gibberellin 20-oxidase activity+++GO:0046872///metal ion binding+++GO:0051213///dioxygenase activity	GO:0009686///gibberellin biosynthetic process+++GO:0009826///unidimensional cell growth+++GO:0009908///flower development	gibberellin 20-oxidase-2
100037505	GA2ox2	mRNA	3.04	8.79667	0.886667	53.0333	1.53335	6.07012	0.010658	5.28113e-72	0.0320215	1.42298e-69	00904///Diterpenoid biosynthesis+++01110///Biosynthesis of secondary metabolites		GO:0016491///oxidoreductase activity+++GO:0046872///metal ion binding+++GO:0051213///dioxygenase activity+++GO:0052634///C-19 gibberellin 2-beta-dioxygenase activity	GO:0045487///gibberellin catabolic process+++GO:0055114///oxidation-reduction process	gibberellin 2-oxidase 2
100134889	GA2ox4	mRNA	0.516667	3.64	0.65	8.36	2.9227	3.91585	3.45704e-05	7.08933e-10	0.000212953	4.85257e-09	00904///Diterpenoid biosynthesis+++01110///Biosynthesis of secondary metabolites		GO:0016491///oxidoreductase activity+++GO:0046872///metal ion binding+++GO:0051213///dioxygenase activity+++GO:0052634///C-19 gibberellin 2-beta-dioxygenase activity	GO:0045487///gibberellin catabolic process+++GO:0055114///oxidation-reduction process	gibberellin 2-oxidase
543839	FUL1	mRNA	4.44	32.1933	8.18	24.7833	2.90272	1.76264	4.15562e-15	1.33115e-05	1.70002e-13	4.88343e-05		GO:0005634///nucleus	GO:0000977///RNA polymerase II regulatory region sequence-specific DNA binding+++GO:0003677///DNA binding+++GO:0003700///DNA-binding transcription factor activity+++GO:0008134///transcription factor binding+++GO:0043565///sequence-specific DNA binding+++GO:0044212///transcription regulatory region DNA binding+++GO:0046983///protein dimerization activity	GO:0006355///regulation of transcription, DNA-templated+++GO:0007275///multicellular organism development+++GO:0045944///positive regulation of transcription by RNA polymerase II	agamous-like MADS-box protein AGL8 homolog
543887	FUL2	mRNA	20.2733	48.1167	37.8233	130.787	1.24805	1.97905	6.44326e-05	3.13488e-14	0.000368745	3.64458e-13		GO:0005634///nucleus	GO:0000977///RNA polymerase II regulatory region sequence-specific DNA binding+++GO:0003677///DNA binding+++GO:0003700///DNA-binding transcription factor activity+++GO:0046983///protein dimerization activity	GO:0006355///regulation of transcription, DNA-templated+++GO:0045944///positive regulation of transcription by RNA polymerase II	transcription factor FRUITFULL
101247719	LOC101247719	mRNA	5.65667	13.66	3.90667	10.9733	1.35637	1.67577	6.01486e-06	1.1303e-41	4.43497e-05	8.71627e-40	04075///Plant hormone signal transduction	GO:0005886///plasma membrane+++GO:0016021///integral component of membrane	GO:0000155///phosphorelay sensor kinase activity+++GO:0043424///protein histidine kinase binding	GO:0009414///response to water deprivation+++GO:0009651///response to salt stress+++GO:0009736///cytokinin-activated signaling pathway+++GO:0009909///regulation of flower development+++GO:0010029///regulation of seed germination+++GO:0010087///phloem or xylem histogenesis+++GO:0010150///leaf senescence+++GO:0010271///regulation of chlorophyll catabolic process+++GO:0016036///cellular response to …	histidine kinase 3
101249868	LOC101249868	mRNA	0.826667	1.07333	0.506667	1.34	0.469778	1.59011	0.491664	0.00733906	0.663068	0.0156695		GO:0005634///nucleus+++GO:0005737///cytoplasm	GO:0000977///RNA polymerase II regulatory region sequence-specific DNA binding+++GO:0003700///DNA-binding transcription factor activity+++GO:0008134///transcription factor binding+++GO:0043565///sequence-specific DNA binding+++GO:0044212///transcription regulatory region DNA binding+++GO:0046983///protein dimerization activity	GO:0007275///multicellular organism development+++GO:0009409///response to cold+++GO:0009739///response to gibberellin+++GO:0009908///flower development+++GO:0009909///regulation of flower development+++GO:0009911///positive regulation of flower development+++GO:0010048///vernalization response+++GO:0010077///maintenance of inflorescence meristem identity+++GO:0030154///cell differentiation+++GO:…	MADS-box protein SOC1-like
101253625	GID1ac	mRNA	3.04333	9.31	6.19333	8.18	1.58694	0.600213	5.36296e-05	0.0593841	0.000314461	0.0988929	04075///Plant hormone signal transduction	GO:0005634///nucleus+++GO:0005737///cytoplasm	GO:0010331///gibberellin binding+++GO:0016787///hydrolase activity	GO:0009739///response to gibberellin+++GO:0009939///positive regulation of gibberellic acid mediated signaling pathway+++GO:0010325///raffinose family oligosaccharide biosynthetic process+++GO:0010476///gibberellin mediated signaling pathway+++GO:0010629///negative regulation of gene expression+++GO:0048444///floral organ morphogenesis+++GO:0048530///fruit morphogenesis	gibberellin receptor GID1ac
100736493	GID1b-1	mRNA	5.04	20.58	9.8	11.08	2.03525	0.321272	8.17907e-09	0.603753	1.14391e-07	0.699078	04075///Plant hormone signal transduction		GO:0016787///hydrolase activity		gibberellin receptor GID1b-1
101258522	MYB21	mRNA	0.543333	91.15	0.08	204.97	7.64488	11.5187	9.43745e-05	2.30348e-42	0.000519343	1.83182e-40		GO:0005634///nucleus	GO:0003677///DNA binding		transcription factor MYB21
101265384	LOC101265384	mRNA	0.18	1.92667	0.27	0.766667	3.55176	1.70763	3.99623e-06	0.154262	3.09603e-05	0.225286	04075///Plant hormone signal transduction	GO:0005634///nucleus	GO:0003700///DNA-binding transcription factor activity+++GO:0003712///transcription coregulator activity+++GO:0043565///sequence-specific DNA binding	GO:0009723///response to ethylene+++GO:0009737///response to abscisic acid+++GO:0009740///gibberellic acid mediated signaling pathway+++GO:0009863///salicylic acid mediated signaling pathway+++GO:0009867///jasmonic acid mediated signaling pathway+++GO:0009938///negative regulation of gibberellic acid mediated signaling pathway+++GO:0010187///negative regulation of seed germination+++GO:0042538///…	DELLA protein GAI
100191138	AP2a	mRNA	7.68333	18.29	4.75667	15.2267	1.38912	1.84339	0.0028182	1.37522e-08	0.0102921	7.92366e-08		GO:0005634///nucleus	GO:0003677///DNA binding+++GO:0003700///DNA-binding transcription factor activity		APETALA2a
100736534	AP2c	mRNA	8.15667	11.98	9.36667	20.39	0.584172	1.31435	0.0118758	5.53286e-21	0.0350101	1.17988e-19		GO:0005634///nucleus	GO:0003677///DNA binding+++GO:0003700///DNA-binding transcription factor activity		APETALA2-like protein AP2c
101244632	LOC101244632	mRNA	3.27333	0.806667	6.58667	0.493333	-2.03658	-3.55676	0.000305023	9.05006e-20	0.00146802	1.74033e-18		GO:0005634///nucleus	GO:0003677///DNA binding+++GO:0003700///DNA-binding transcription factor activity+++GO:0043565///sequence-specific DNA binding	GO:0009908///flower development+++GO:0010492///maintenance of shoot apical meristem identity+++GO:0019760///glucosinolate metabolic process+++GO:0030154///cell differentiation+++GO:0042127///regulation of cell proliferation+++GO:0048830///adventitious root development+++GO:0080037///negative regulation of cytokinin-activated signaling pathway	AP2-like ethylene-responsive transcription factor ANT
101245946	LOC101245946	mRNA	9.17333	4.50667	9.13	2.77	-0.995828	-1.55412	2.23979e-05	3.38103e-06	0.000143971	1.35924e-05		GO:0005634///nucleus+++GO:0005737///cytoplasm	GO:0005200///structural constituent of cytoskeleton	GO:0006338///chromatin remodeling+++GO:0006355///regulation of transcription, DNA-templated+++GO:0006952///defense response+++GO:0006970///response to osmotic stress+++GO:0008283///cell proliferation+++GO:0009266///response to temperature stimulus+++GO:0009845///seed germination+++GO:0009910///negative regulation of flower development+++GO:0030029///actin filament-based process	actin-related protein 6
101246885	LOC101246885	mRNA	21.74	8.12	28.4767	7.63333	-1.38397	-1.72395	2.0758e-15	4.04438e-16	8.97255e-14	5.67924e-15		GO:0005634///nucleus+++GO:0005737///cytoplasm	GO:0005200///structural constituent of cytoskeleton	GO:0006325///chromatin organization+++GO:0009653///anatomical structure morphogenesis+++GO:0009793///embryo development ending in seed dormancy+++GO:0010227///floral organ abscission	actin-related protein 7
101266766	LOC101266766	mRNA	2.54333	1.44667	4.84667	1.32	-0.656805	-1.70364	0.383548	1.23853e-06	0.559322	5.32795e-06		GO:0005634///nucleus	GO:0000900///translation repressor activity, mRNA regulatory element binding+++GO:0000977///RNA polymerase II regulatory region sequence-specific DNA binding+++GO:0003700///DNA-binding transcription factor activity+++GO:0008134///transcription factor binding+++GO:0043565///sequence-specific DNA binding+++GO:0044212///transcription regulatory region DNA binding+++GO:0046983///protein dimerization …	GO:0007275///multicellular organism development+++GO:0009266///response to temperature stimulus+++GO:0009910///negative regulation of flower development+++GO:0030154///cell differentiation+++GO:0045892///negative regulation of transcription, DNA-templated+++GO:0045944///positive regulation of transcription by RNA polymerase II+++GO:0048438///floral whorl development	MADS-box protein SVP
101252303	LOC101252303	mRNA	6.00667	13.9533	6.89	15.61	1.30566	1.39038	1.43969e-05	0.000477976	9.69368e-05	0.00132245	04075///Plant hormone signal transduction	GO:0005634///nucleus	GO:0003677///DNA binding+++GO:0003700///DNA-binding transcription factor activity+++GO:0046983///protein dimerization activity	GO:0009585///red, far-red light phototransduction+++GO:0009693///ethylene biosynthetic process+++GO:0010244///response to low fluence blue light stimulus by blue low-fluence system+++GO:0010600///regulation of auxin biosynthetic process+++GO:0010928///regulation of auxin mediated signaling pathway	transcription factor PIF4
101246029	SFT	mRNA	0.133333	1.52333	0.21	0.843333	3.52002	2.20721	0.000482126	0.0123289	0.00219278	0.0248807	04712///Circadian rhythm - plant		GO:0008429///phosphatidylethanolamine binding	GO:0009909///regulation of flower development+++GO:0048573///photoperiodism, flowering	protein single flower truss
101252492	LOC101252492	mRNA	120.273	68.3933	158.67	63.69	-0.836995	-1.14034	0.015416	1.63964e-15	0.0436437	2.18457e-14				GO:0009908///flower development+++GO:0030154///cell differentiation	FRIGIDA-like protein 3
101251416	LOC101251416	mRNA	0.916667	63.47	1.26667	45.7067	6.14902	5.36126	1.14759e-40	2.5392e-21	7.96668e-38	5.52283e-20				GO:0009909///regulation of flower development	flowering-promoting factor 1-like protein 3
544020	PRK2	mRNA	0.0133333	19.06	0.0133333	45.0667	10.2078	11.5348	2.4383e-16	0.000174804	1.21169e-14	0.000527546		GO:0016020///membrane+++GO:0016021///integral component of membrane	GO:0004672///protein kinase activity+++GO:0005524///ATP binding+++GO:0016301///kinase activity	GO:0006468///protein phosphorylation+++GO:0016310///phosphorylation	receptor-like protein kinase
544021	PRK1	mRNA	0	9.06	0	18.1867	11.0252	12.1296	4.47641e-14	0.000520795	1.55379e-12	0.00142985	04010///MAPK signaling pathway+++04064///NF-kappa B signaling pathway+++04620///Toll-like receptor signaling pathway+++04621///NOD-like receptor signaling pathway+++04624///Toll and Imd signaling pathway+++04722///Neurotrophin signaling pathway+++05133///Pertussis+++05140///Leishmaniasis+++05142///Chagas disease (American trypanosomiasis)+++05145///Toxoplasmosis+++05152///Tuberculosis+++05161///H…	GO:0016020///membrane+++GO:0016021///integral component of membrane	GO:0000166///nucleotide binding+++GO:0004672///protein kinase activity+++GO:0005524///ATP binding+++GO:0016301///kinase activity	GO:0006468///protein phosphorylation+++GO:0016310///phosphorylation	receptor-like protein kinase
778332	KPP	mRNA	0.226667	4.03333	0.533333	7.89333	4.3539	3.99552	0.000471456	0.0252629	0.00215108	0.0468195			GO:0005085///guanyl-nucleotide exchange factor activity+++GO:0005089///Rho guanyl-nucleotide exchange factor activity+++GO:0016301///kinase activity	GO:0016310///phosphorylation	pollen-specific kinase partner protein
101243937	LOC101243937	mRNA	0.07	7.76	0.17	18.6	6.84241	6.88048	1.94399e-17	0.000421469	1.14855e-15	0.00118035		GO:0005886///plasma membrane+++GO:0009506///plasmodesma+++GO:0009507///chloroplast+++GO:0016021///integral component of membrane+++GO:0016324///apical plasma membrane	GO:0004672///protein kinase activity+++GO:0004674///protein serine/threonine kinase activity+++GO:0005524///ATP binding	GO:0046777///protein autophosphorylation+++GO:0080092///regulation of pollen tube growth	probable receptor-like protein kinase At4g39110
101249782	LOC101249782	mRNA	0.0533333	11.1733	0.326667	23.85	7.76876	6.31396	5.60067e-20	0.00313943	4.54985e-18	0.00728495		GO:0000148///1,3-beta-D-glucan synthase complex+++GO:0016021///integral component of membrane	GO:0003843///1,3-beta-D-glucan synthase activity	GO:0006075///(1->3)-beta-D-glucan biosynthetic process+++GO:0008360///regulation of cell shape+++GO:0009556///microsporogenesis+++GO:0009846///pollen germination+++GO:0009860///pollen tube growth+++GO:0010208///pollen wall assembly+++GO:0071555///cell wall organization+++GO:0080092///regulation of pollen tube growth	callose synthase 5
101245709	BOP3	mRNA	5.70333	5.65	8.87333	1.93667	-0.0428303	-1.98566	0.939933	2.8538e-08	0.968171	1.57458e-07	04075///Plant hormone signal transduction	GO:0005634///nucleus+++GO:0005737///cytoplasm		GO:0009864///induced systemic resistance, jasmonic acid mediated signaling pathway+++GO:0009944///polarity specification of adaxial/abaxial axis+++GO:0009954///proximal/distal pattern formation+++GO:0010227///floral organ abscission+++GO:0010254///nectary development+++GO:0010434///bract formation+++GO:0010582///floral meristem determinacy+++GO:0016567///protein ubiquitination+++GO:0048439///flow…	BLADE-ON-PETIOLE protein BOP3
101246001	BOP2	mRNA	2.22667	0.833333	3.62667	1.34667	-1.45665	-1.27123	0.0277462	0.00752054	0.0713078	0.0159973	04075///Plant hormone signal transduction	GO:0005634///nucleus		GO:0009864///induced systemic resistance, jasmonic acid mediated signaling pathway	BLADE-ON-PETIOLE protein BOP2
101246295	LOC101246295	mRNA	8.28	24.63	6.42	9.94333	1.56195	0.800868	0.00203842	0.120747	0.00776103	0.182865	00908///Zeatin biosynthesis		GO:0050403///trans-zeatin O-beta-D-glucosyltransferase activity+++GO:0050404///zeatin O-beta-D-xylosyltransferase activity	GO:0006486///protein glycosylation+++GO:0009690///cytokinin metabolic process+++GO:0009965///leaf morphogenesis+++GO:0010015///root morphogenesis+++GO:0010083///regulation of vegetative meristem growth+++GO:0010380///regulation of chlorophyll biosynthetic process+++GO:0045926///negative regulation of growth+++GO:0048316///seed development+++GO:0048439///flower morphogenesis	zeatin O-glucosyltransferase
101247407	LOC101247407	mRNA	2.47	5.07667	0.663333	2.15333	1.18136	1.89092	0.109637	0.050621	0.216737	0.00514678			GO:0050403///trans-zeatin O-beta-D-glucosyltransferase activity+++GO:0050404///zeatin O-beta-D-xylosyltransferase activity	GO:0010083///regulation of vegetative meristem growth+++GO:0010380///regulation of chlorophyll biosynthetic process+++GO:0045926///negative regulation of growth+++GO:0048316///seed development+++GO:0048439///flower morphogenesis+++GO:0006486///protein glycosylation+++GO:0009690///cytokinin metabolic process+++GO:0009965///leaf morphogenesis+++GO:0010015///root morphogenesis
101246927	TAA1	mRNA	0.01	0.253333	0.0133333	1.20333	4.29821	6.68347	0.0302939	0.000626365	0.076711	0.0016933	00380///Tryptophan metabolism+++01100///Metabolic pathways	GO:0005737///cytoplasm	GO:0004021///L-alanine:2-oxoglutarate aminotransferase activity+++GO:0004838///L-tyrosine:2-oxoglutarate aminotransferase activity+++GO:0016846///carbon-sulfur lyase activity+++GO:0030170///pyridoxal phosphate binding+++GO:0047312///L-phenylalanine:pyruvate aminotransferase activity+++GO:0050048///L-leucine:2-oxoglutarate aminotransferase activity+++GO:0050362///L-tryptophan:2-oxoglutarate aminot…	GO:0009641///shade avoidance+++GO:0009684///indoleacetic acid biosynthetic process+++GO:0009723///response to ethylene+++GO:0009908///flower development+++GO:0009926///auxin polar transport+++GO:0009958///positive gravitropism+++GO:0010078///maintenance of root meristem identity+++GO:0010087///phloem or xylem histogenesis+++GO:0042742///defense response to bacterium+++GO:0048364///root developmen…	L-tryptophan--pyruvate aminotransferase 1-like
101252256	LOC101252256	mRNA	47.55	100.227	43.1167	205.84	1.10718	2.3812	0.00684687	0.00536478	0.022114	0.0118201	00071///Fatty acid degradation+++00592///alpha-Linolenic acid metabolism+++01100///Metabolic pathways+++01110///Biosynthesis of secondary metabolites+++01212///Fatty acid metabolism	GO:0005618///cell wall+++GO:0005777///peroxisome+++GO:0009506///plasmodesma+++GO:0009507///chloroplast	GO:0003729///mRNA binding+++GO:0003857///3-hydroxyacyl-CoA dehydrogenase activity+++GO:0004165///dodecenoyl-CoA delta-isomerase activity+++GO:0004300///enoyl-CoA hydratase activity+++GO:0008017///microtubule binding+++GO:0008692///3-hydroxybutyryl-CoA epimerase activity+++GO:0018812///3-hydroxyacyl-CoA dehydratase activity	GO:0006635///fatty acid beta-oxidation+++GO:0009695///jasmonic acid biosynthetic process+++GO:0009908///flower development	peroxisomal fatty acid beta-oxidation multifunctional protein AIM1
101249569	LOC101249569	mRNA	3.45667	5.7	3.32333	7.20667	0.780729	1.29688	0.0665431	2.59305e-15	0.145712	3.3859e-14		GO:0005634///nucleus	GO:0003700///DNA-binding transcription factor activity+++GO:0043565///sequence-specific DNA binding	GO:0009908///flower development+++GO:0048366///leaf development+++GO:1901371///regulation of leaf morphogenesis	B3 domain-containing transcription factor NGA1-like
101250453	LOC101250453	mRNA	5.22667	20.1333	4.29667	18.7067	1.97691	2.3135	3.21324e-11	6.77831e-11	6.97746e-10	5.29119e-10		GO:0005634///nucleus	GO:0003677///DNA binding+++GO:0003700///DNA-binding transcription factor activity	GO:0009908///flower development	NAC domain-containing protein 35
100134911	JAZ2	mRNA	6.58667	9.49333	4.06333	37.6467	0.577878	3.38192	0.380756	4.61126e-06	0.556951	1.81651e-05	04075///Plant hormone signal transduction	GO:0005634///nucleus		GO:0009611///response to wounding+++GO:0031347///regulation of defense response+++GO:2000022///regulation of jasmonic acid mediated signaling pathway	jasmonate ZIM-domain protein 2
