# Supplementary material for: Transcriptome Analysis of Flower Development and Mining of Genes Related to Flowering Time in Tomato (Solanum lycopersicum)
Source: Int J Mol Sci. 2021 Jul 29;22(15):8128. doi: 10.3390/ijms22158128 (PMC8347202; doi:10.3390/ijms22158128)
Supplement: Supplementary file 1 [file ijms-22-08128-s001.zip › Table S5.xls]

## Sheet: Sheet1
Table S5 Primers used for qRT-PCR
Gene ID	Upstream Primer	Downstream Primer
PAL6	CTCCGAGCTTGTCAACGACT	CGCGCTTTGTACGTGGTTAG
GA2ox2	CATTCGGGCTGCGGTTAATG	TGGCGGATAGTGATTCAGCC
CO1	TGTACCGTTTACTGTCGGGC	TGCAGAGTGAATGTCAGCGT
CRY2	TTGAGACCCCGTAACCTCCT	TGTCTGCATTGCTCCAACCT
SPGB	CTTGCACCAACCAAATGCAAG	TGCAAACAGAGTAACTCGGCA
JAZ2	CGTCATCGTCGTCCGTTGAA	CAGAAGGCTGTGGCATTGAC
101247413	CCACACCCCTATCGAACACC	GCACTTGGTTCGCCTTGTTT
FUL1	ACGTCGATCTGGTTTGCTGA	AAAGAGAATCAGGGCGGCTC
